# Supplementary material
Source: publisher figshare collection journal article supplement (https://acs.figshare.com/ndownloader/files/4164754)

## Supporting Information

### Reversal of selectivity in acetate aldol reactions of *N*-acetyl-(*S*)-4-isopropyl-1-[(*R*)-1-phenylethyl]imidazolidin-2-one

Gopal L. Khatik, Varun Kumar, and Vipin A. Nair\*

Department of Medicinal Chemistry, National Institute of Pharmaceutical Education and Research (NIPER), Sector 67, Mohali, Punjab 160 062, India.

*Email: [vn74nr@yahoo.com](mailto:vn74nr@yahoo.com), [vnair@niper.ac.in](mailto:vnair@niper.ac.in)*

### NMR Spectra (<sup>1</sup>H and <sup>13</sup>C)

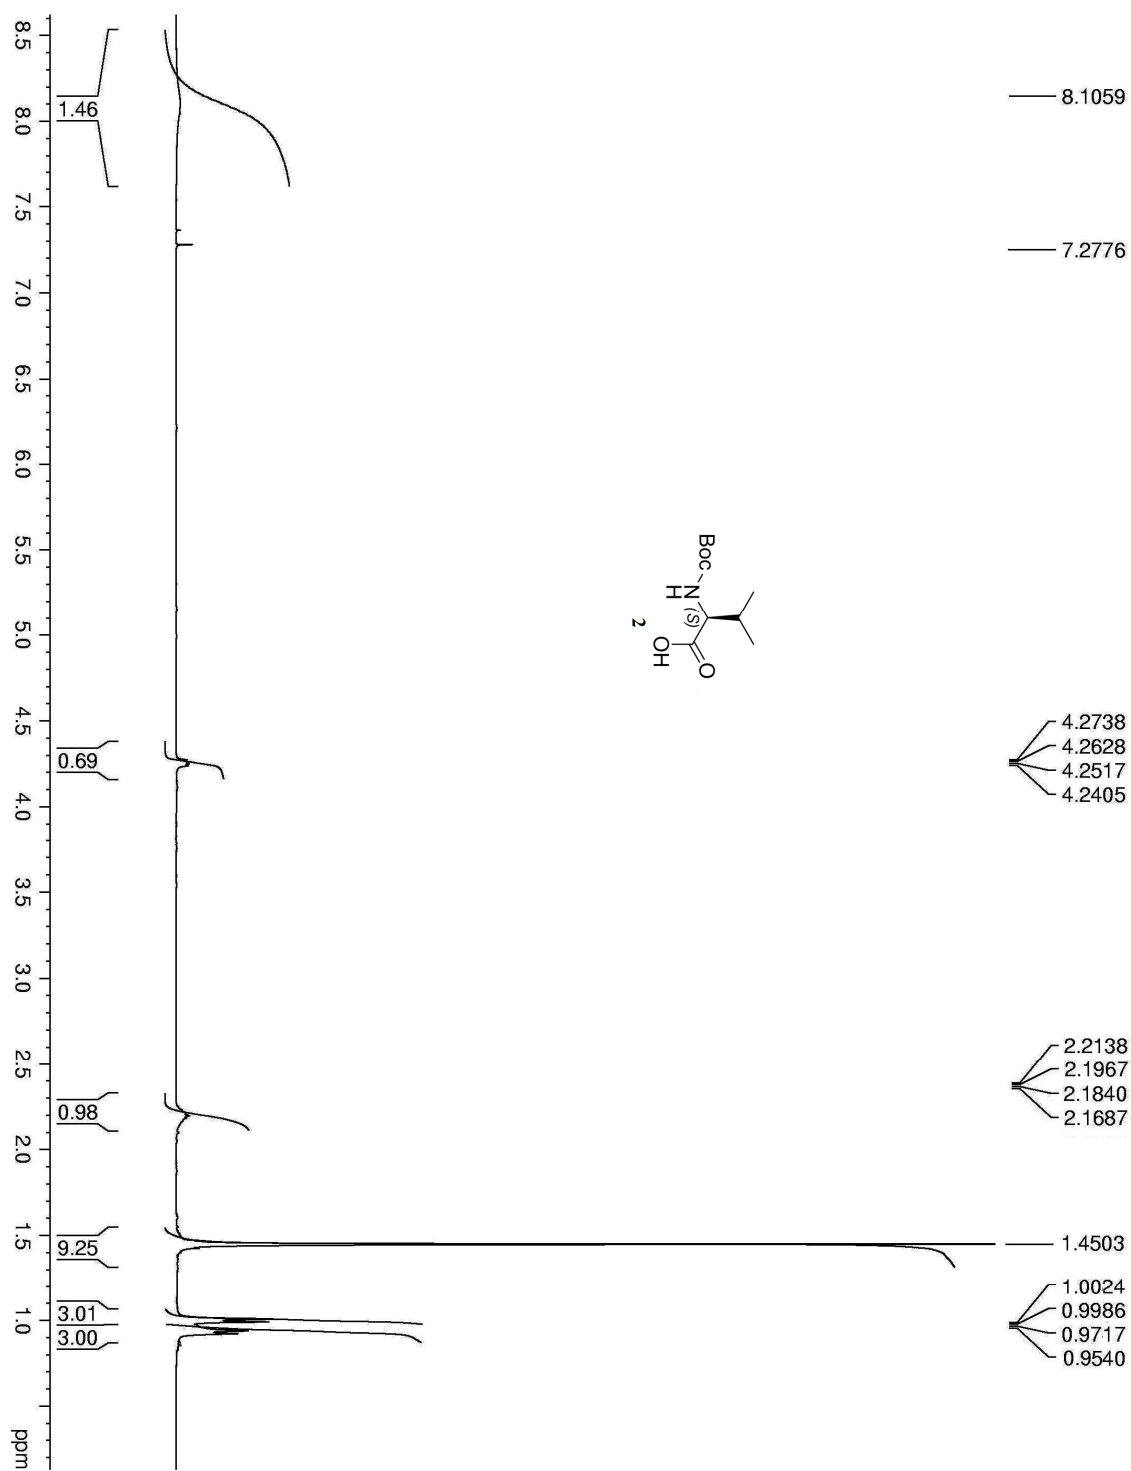



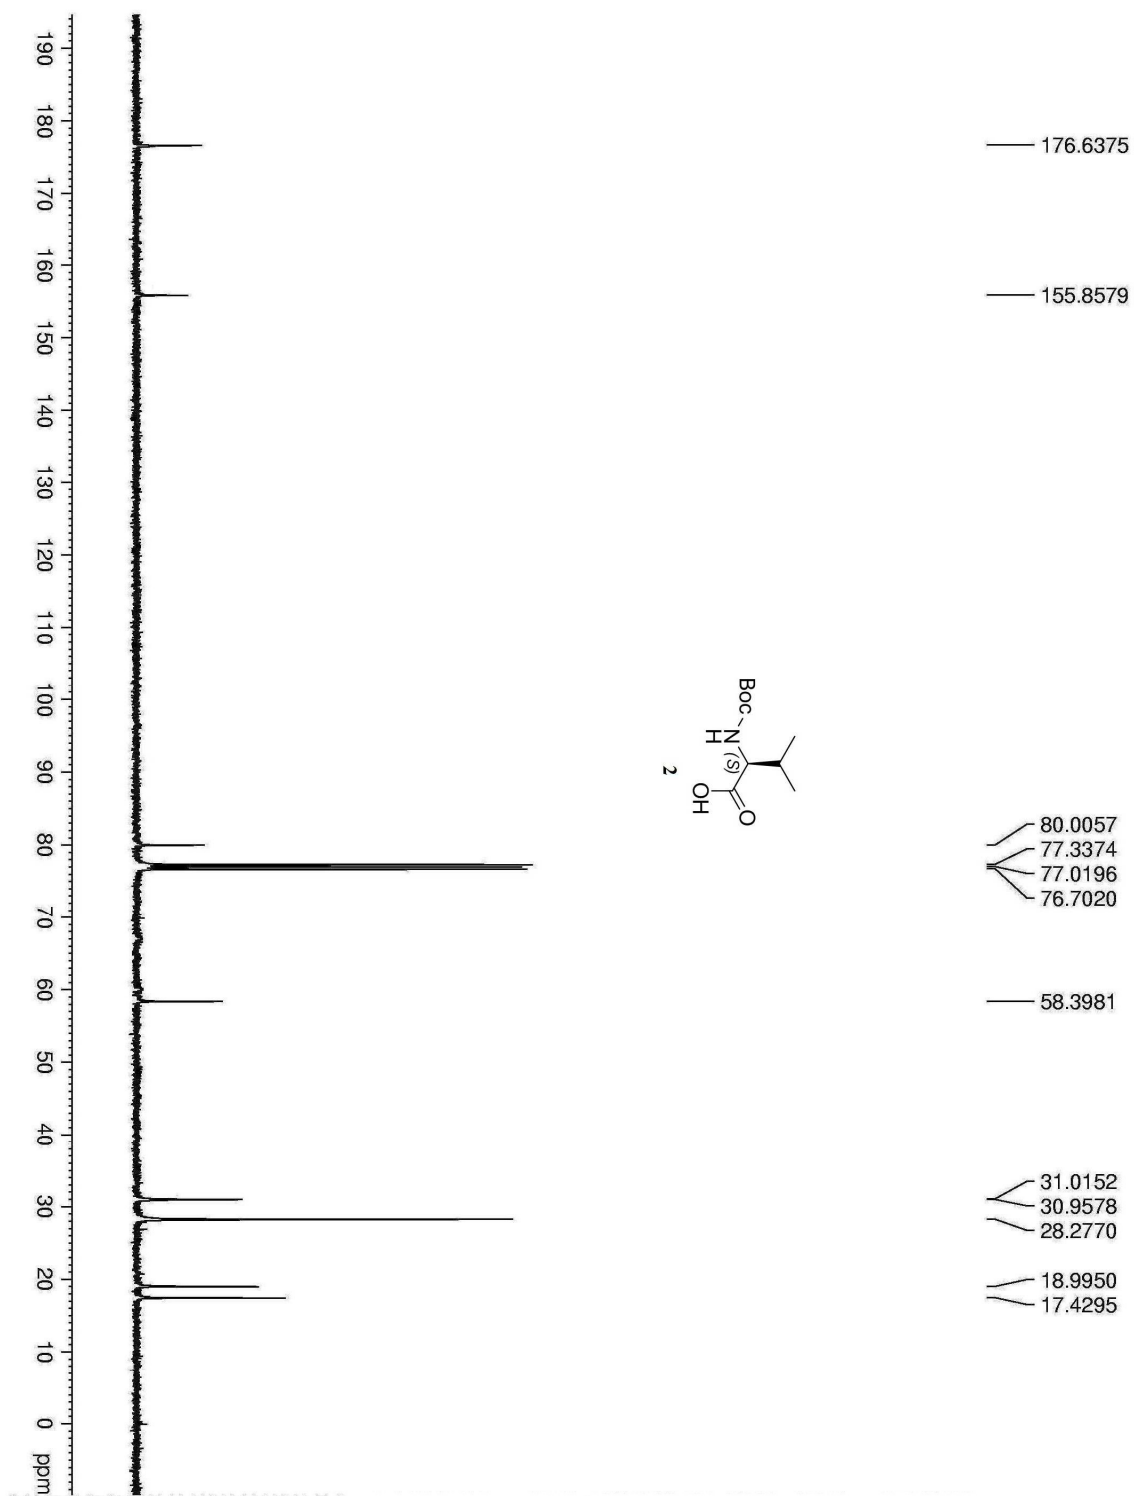

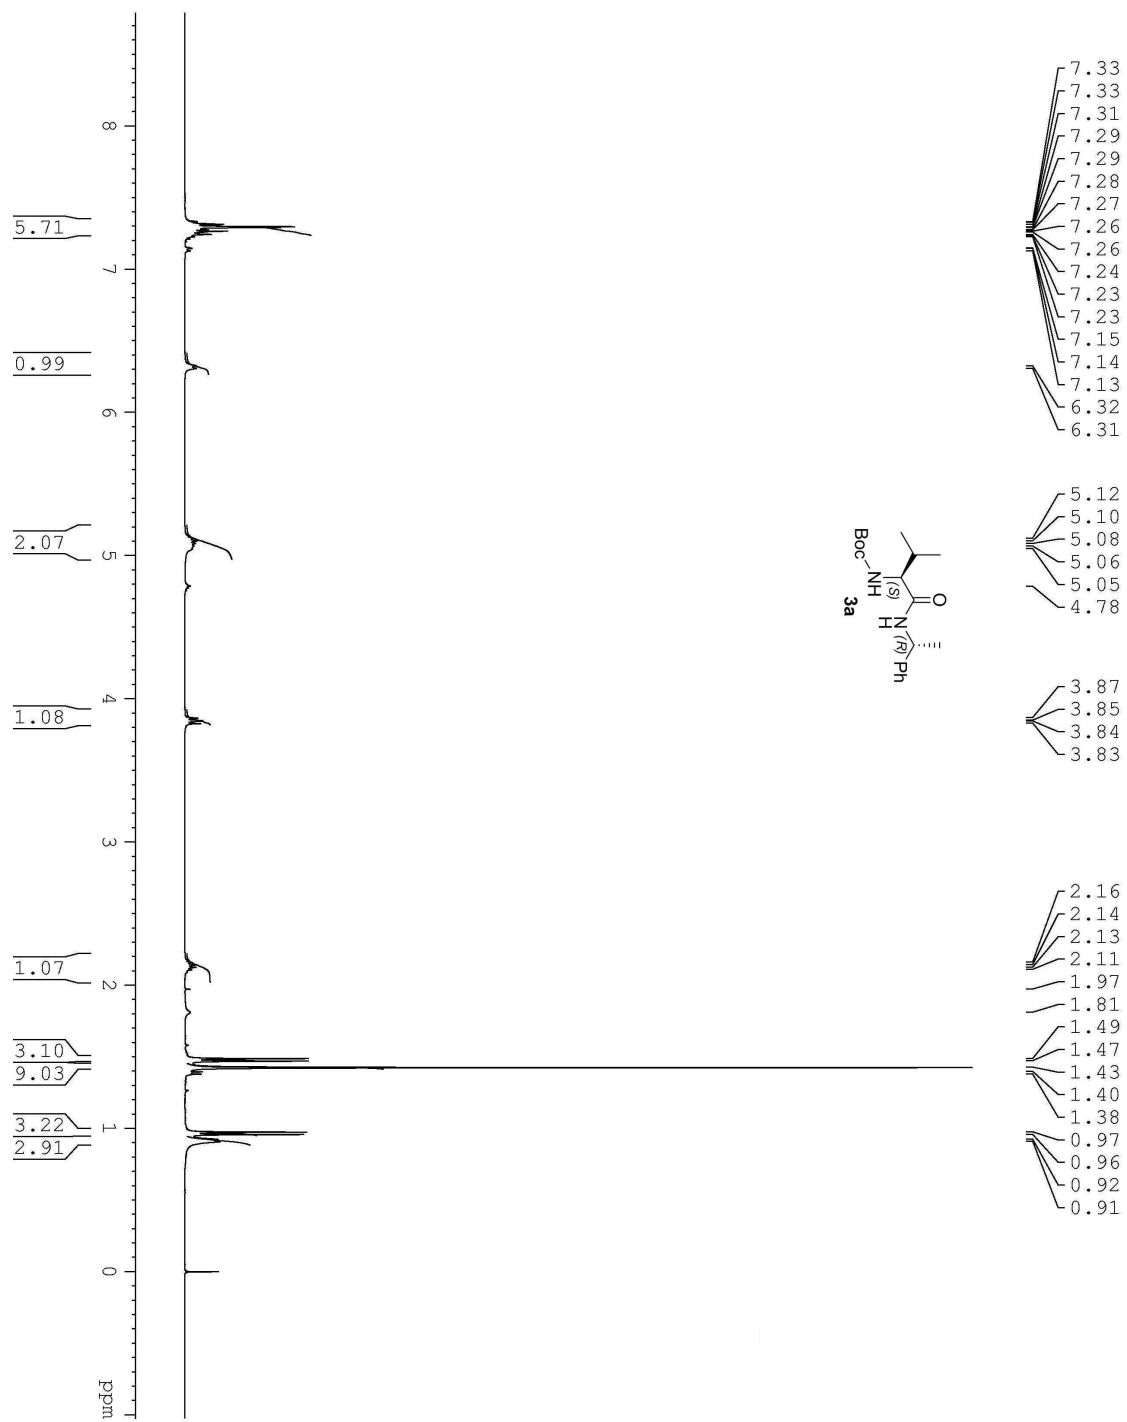

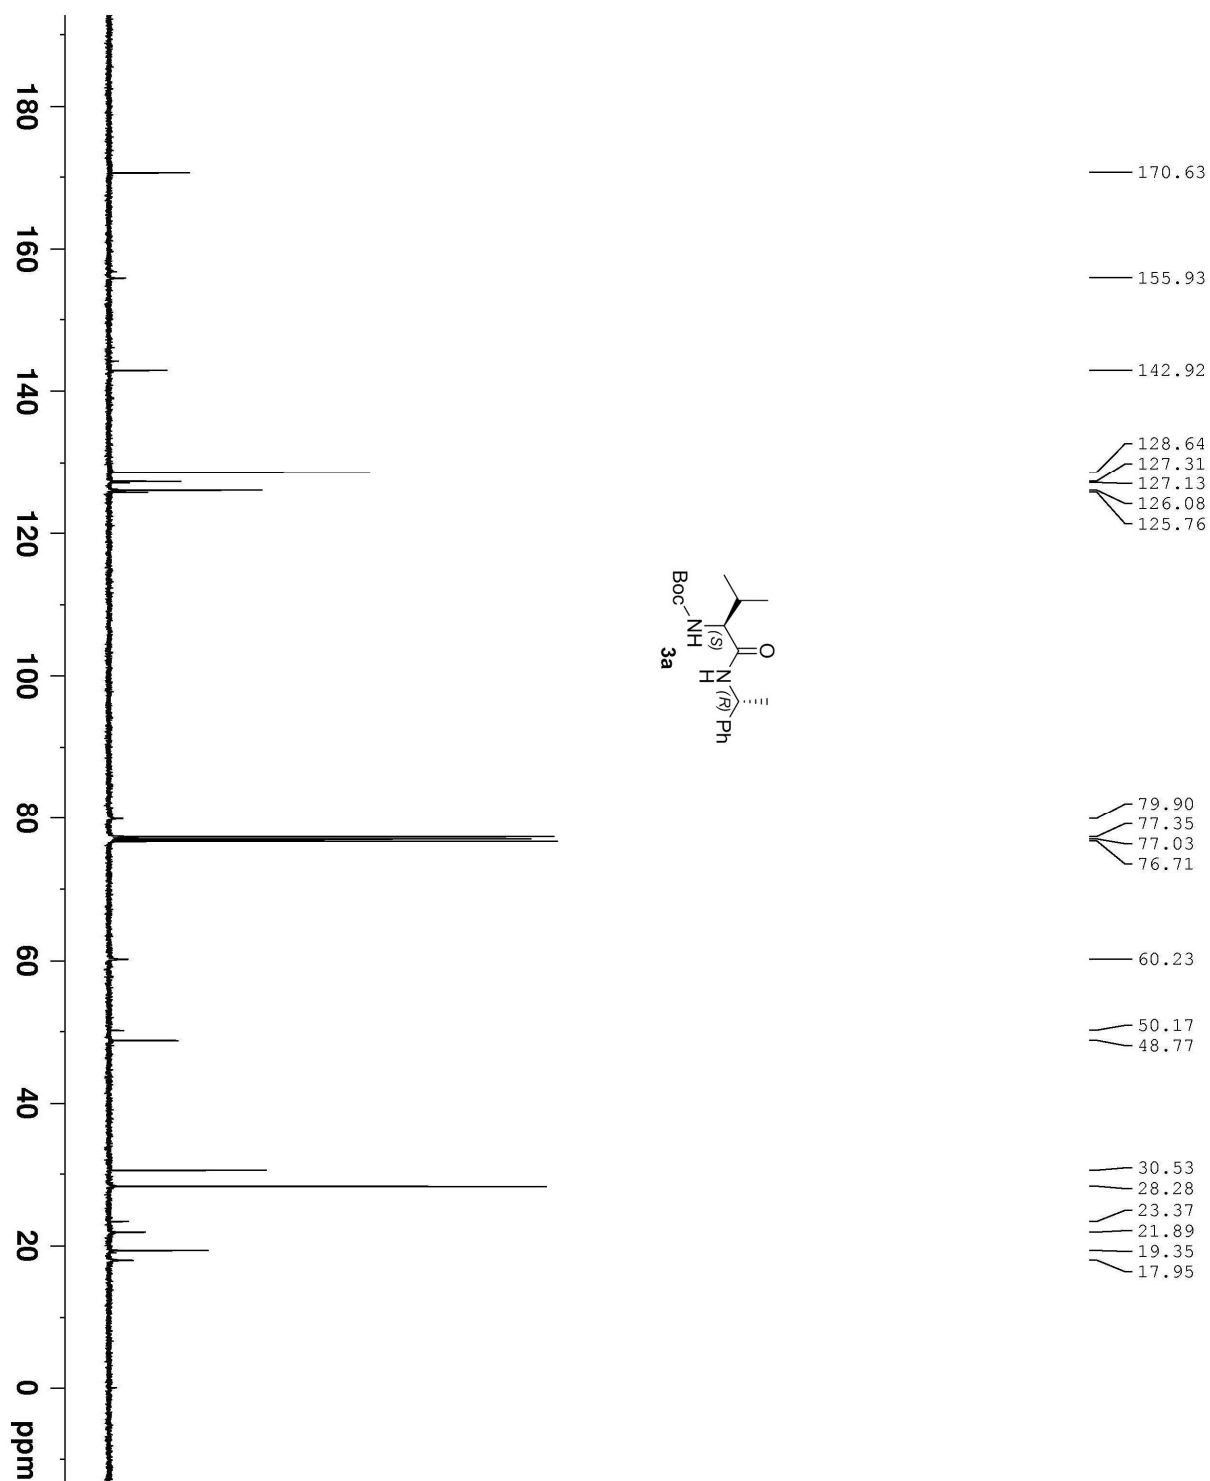

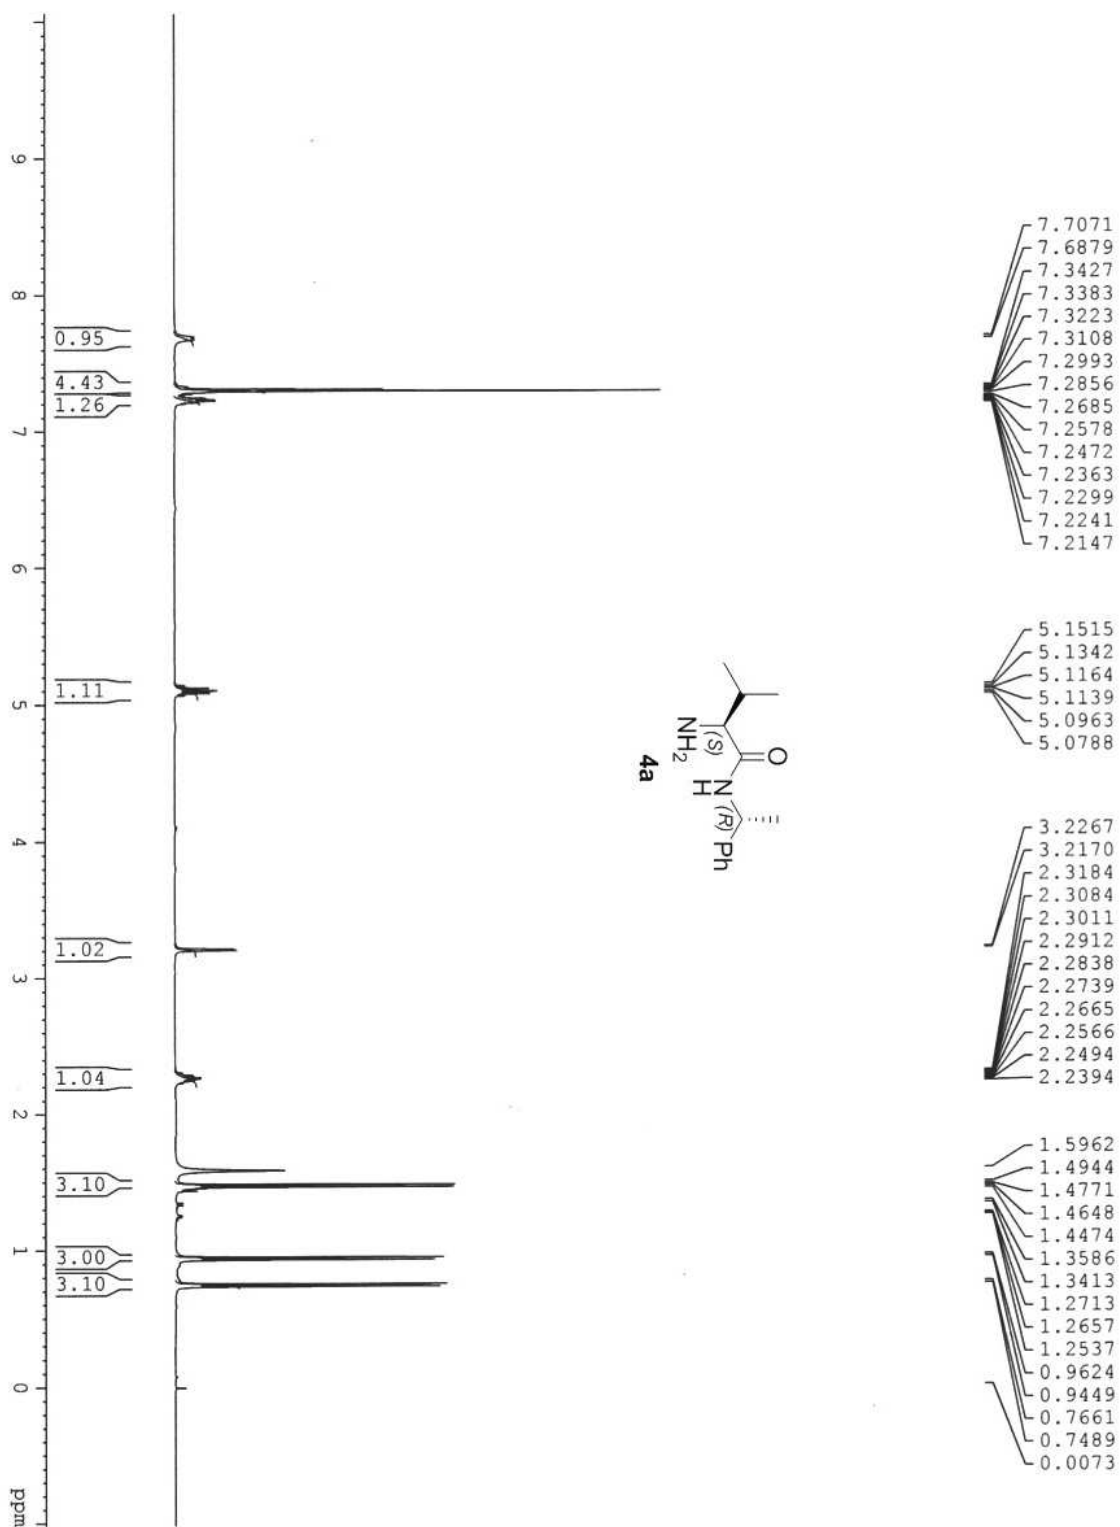

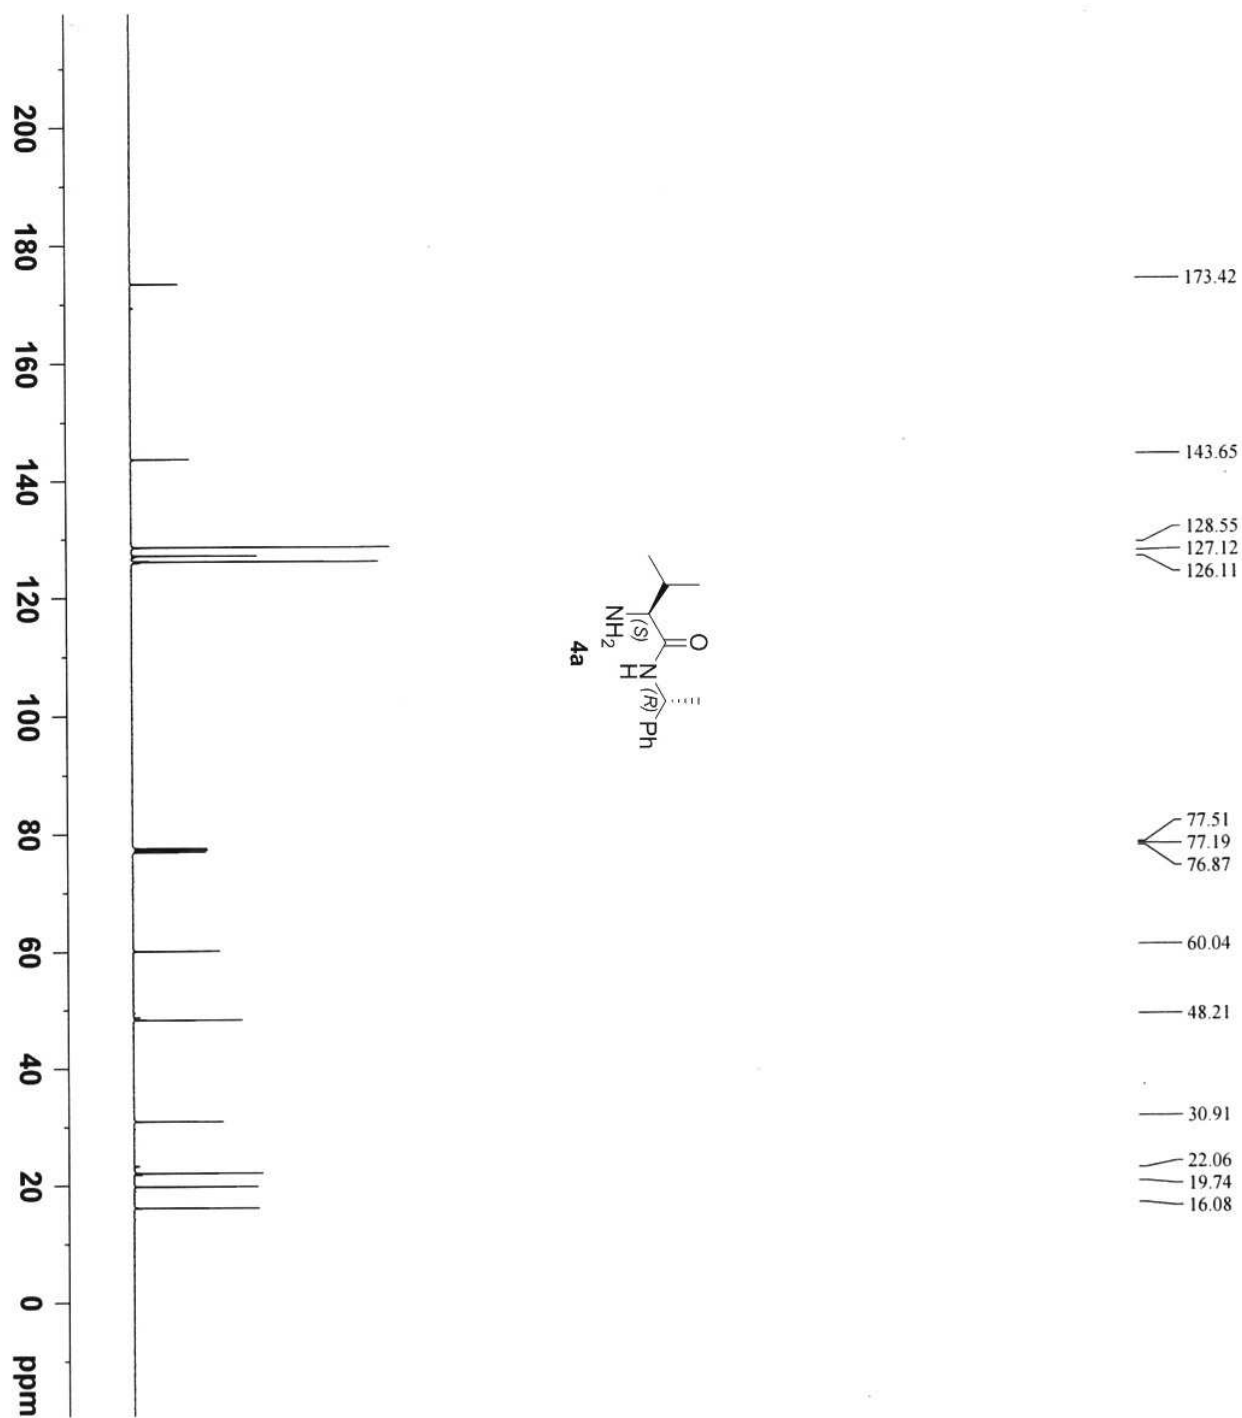

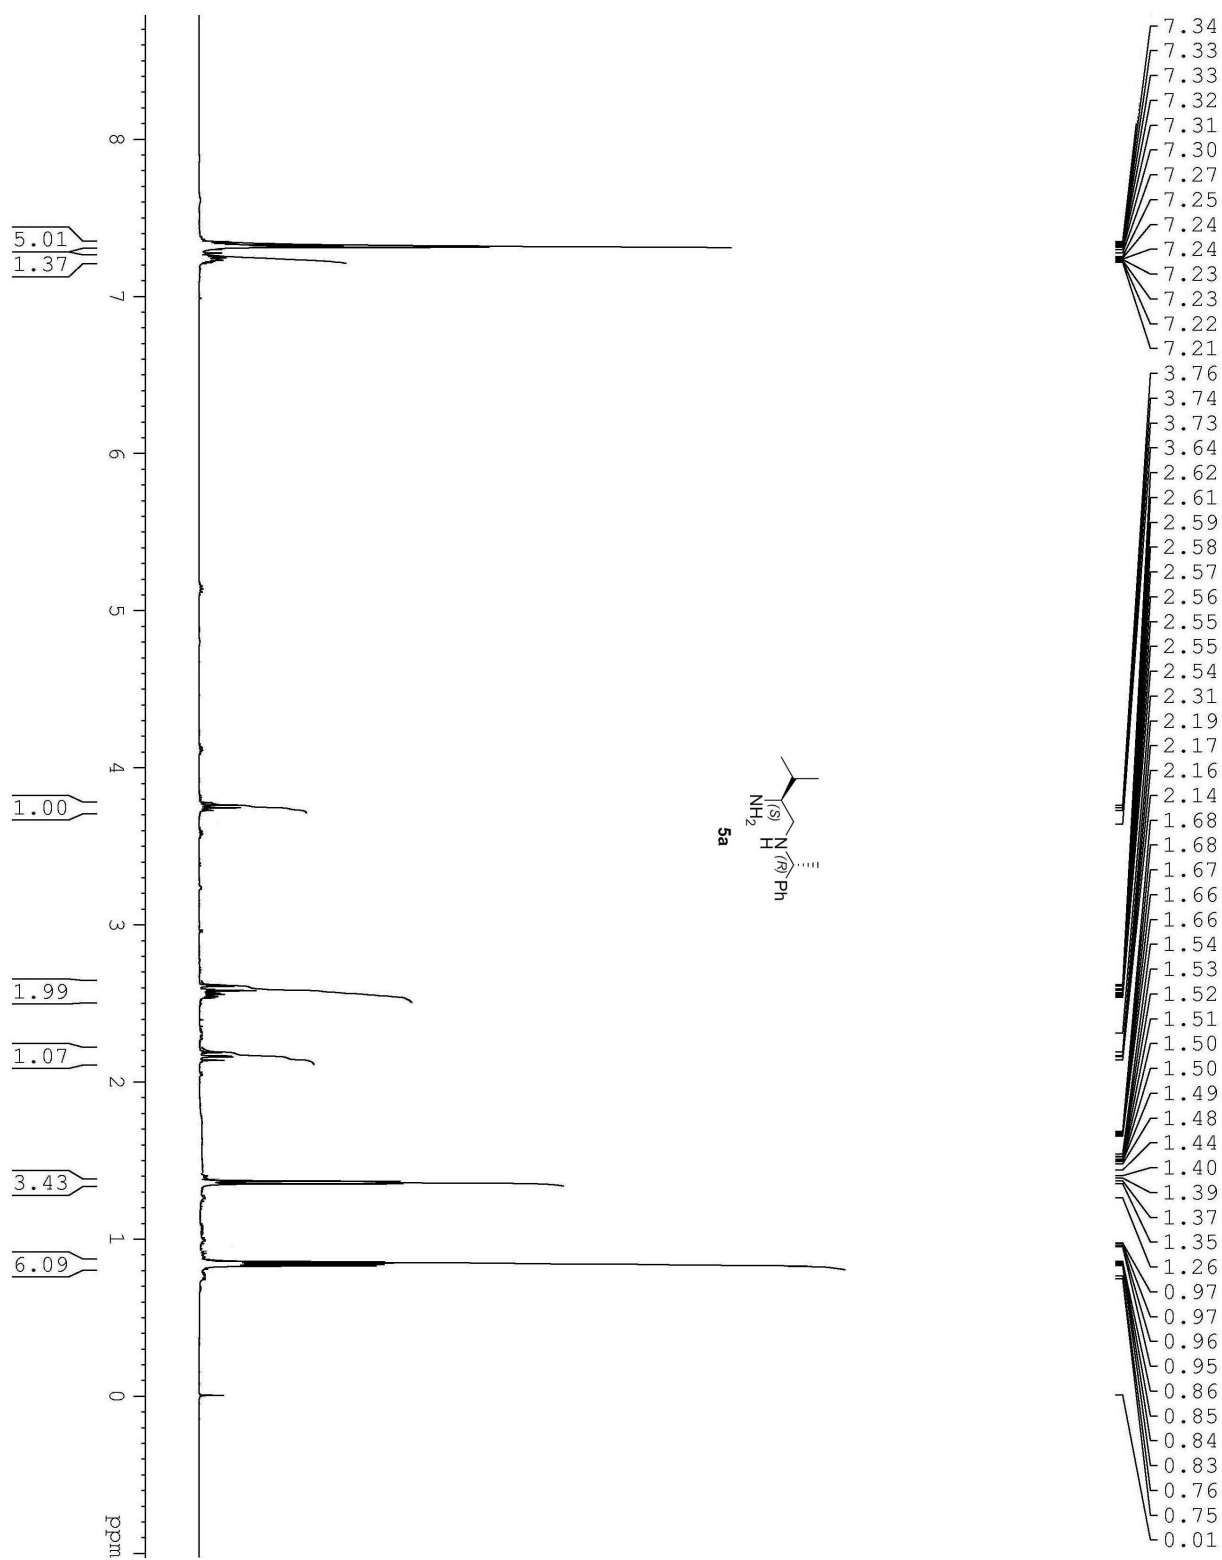

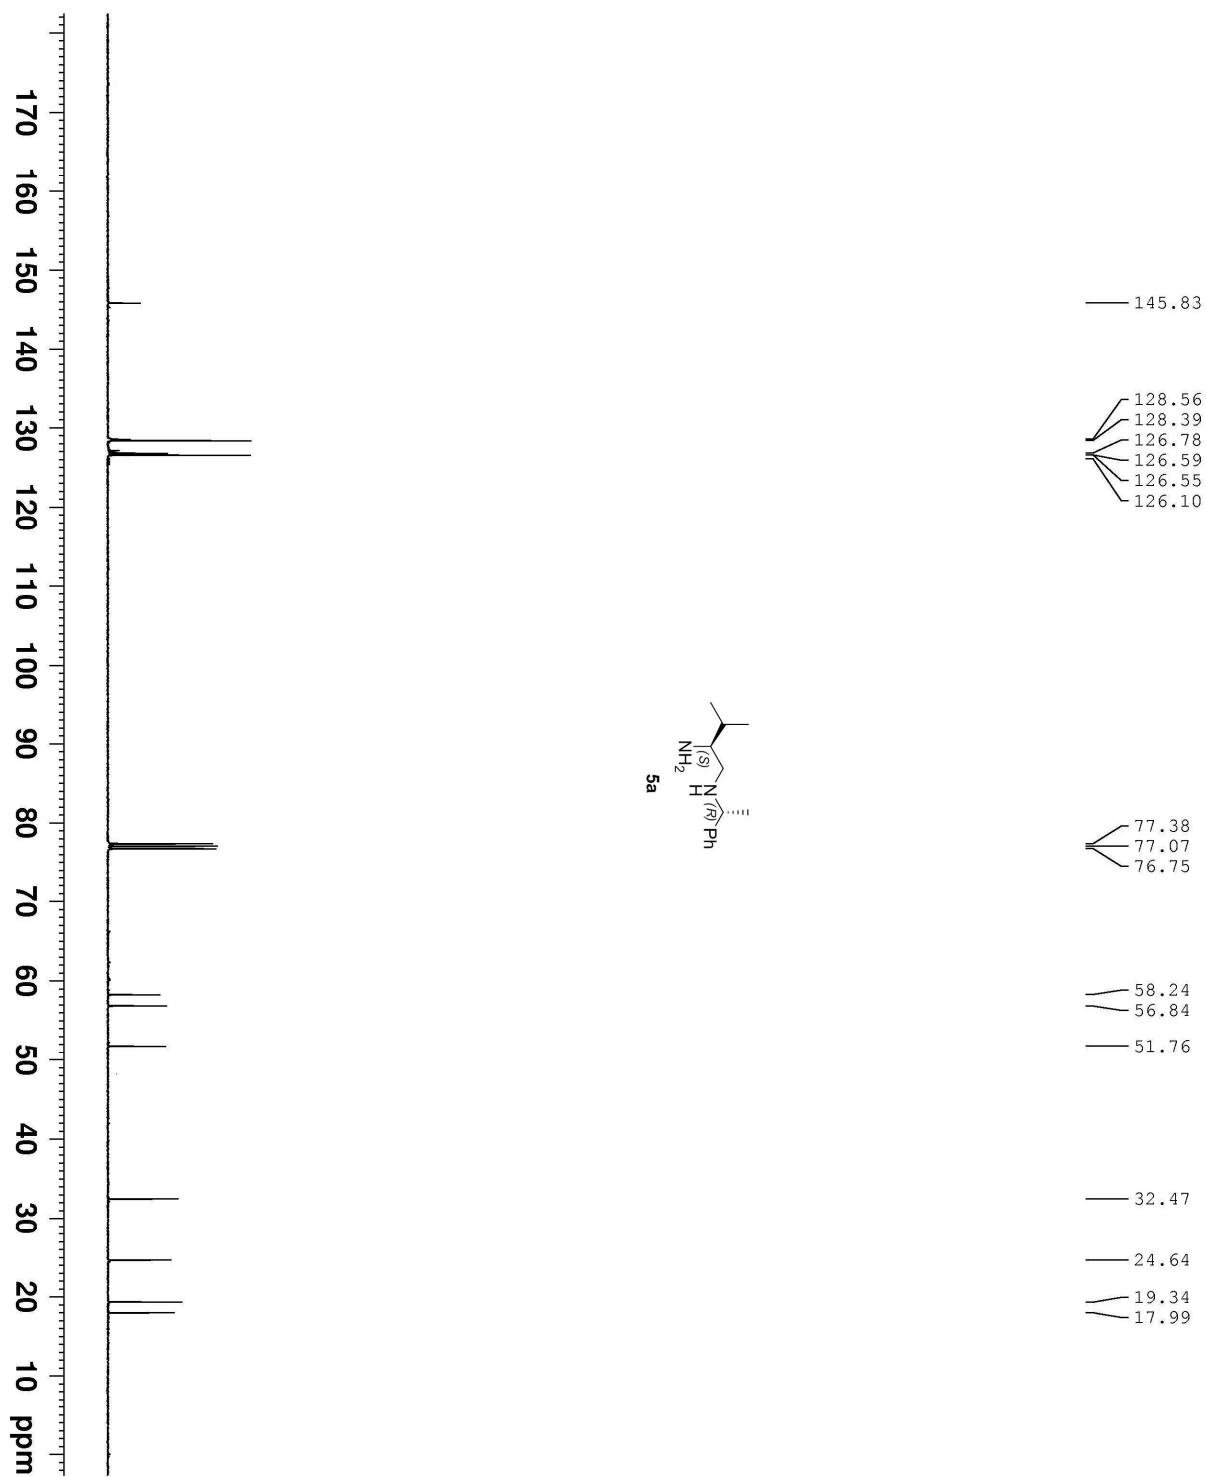

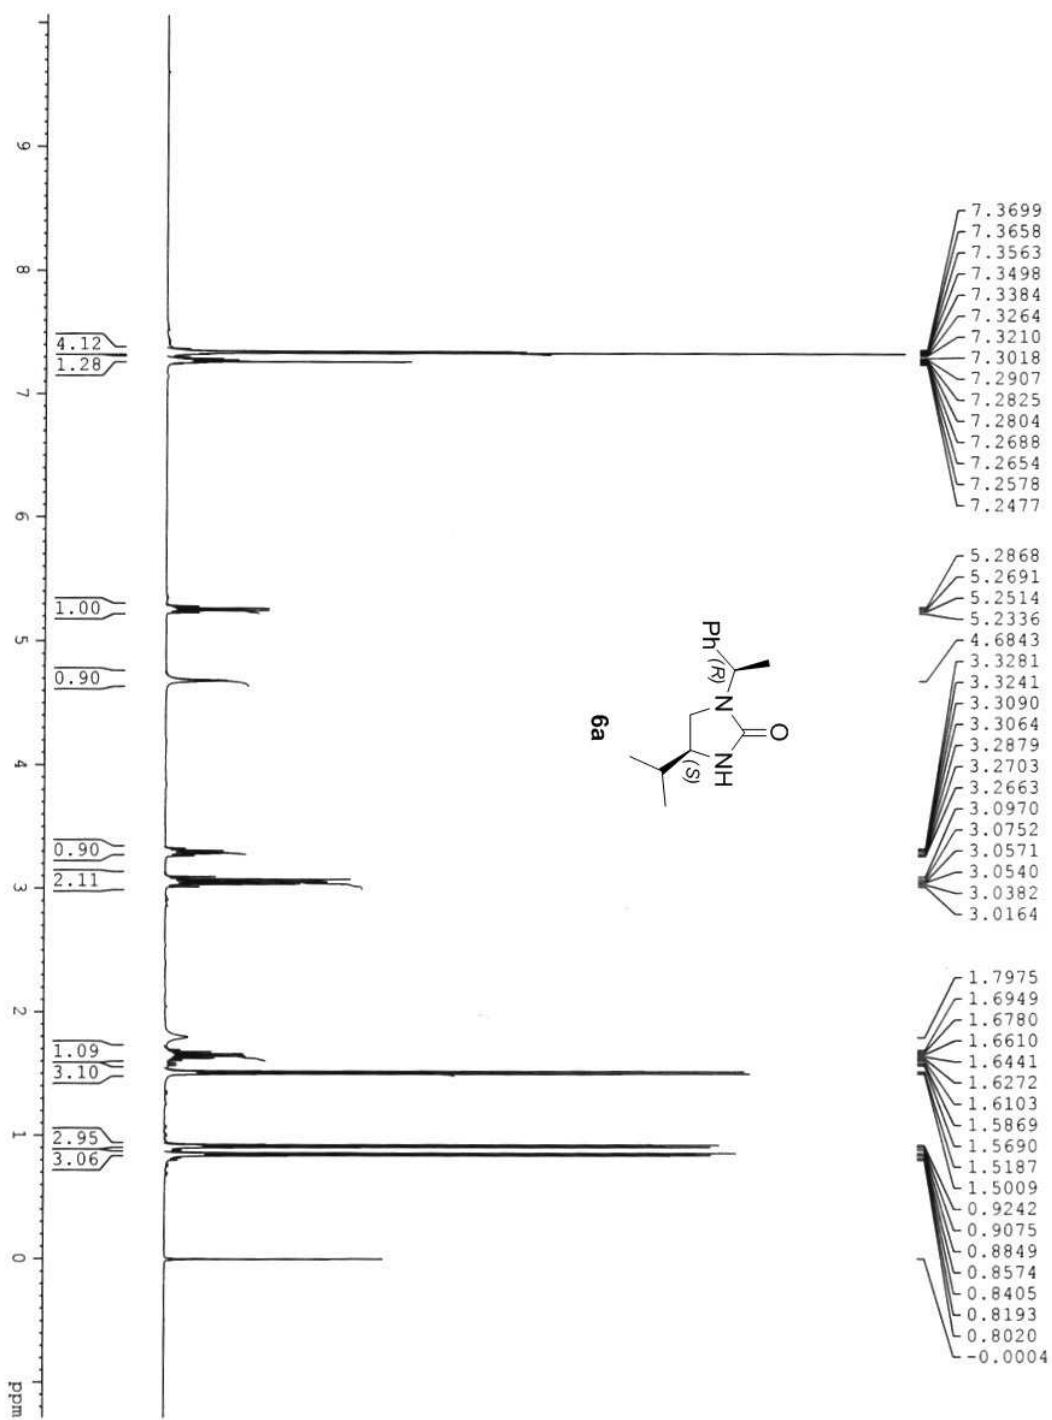



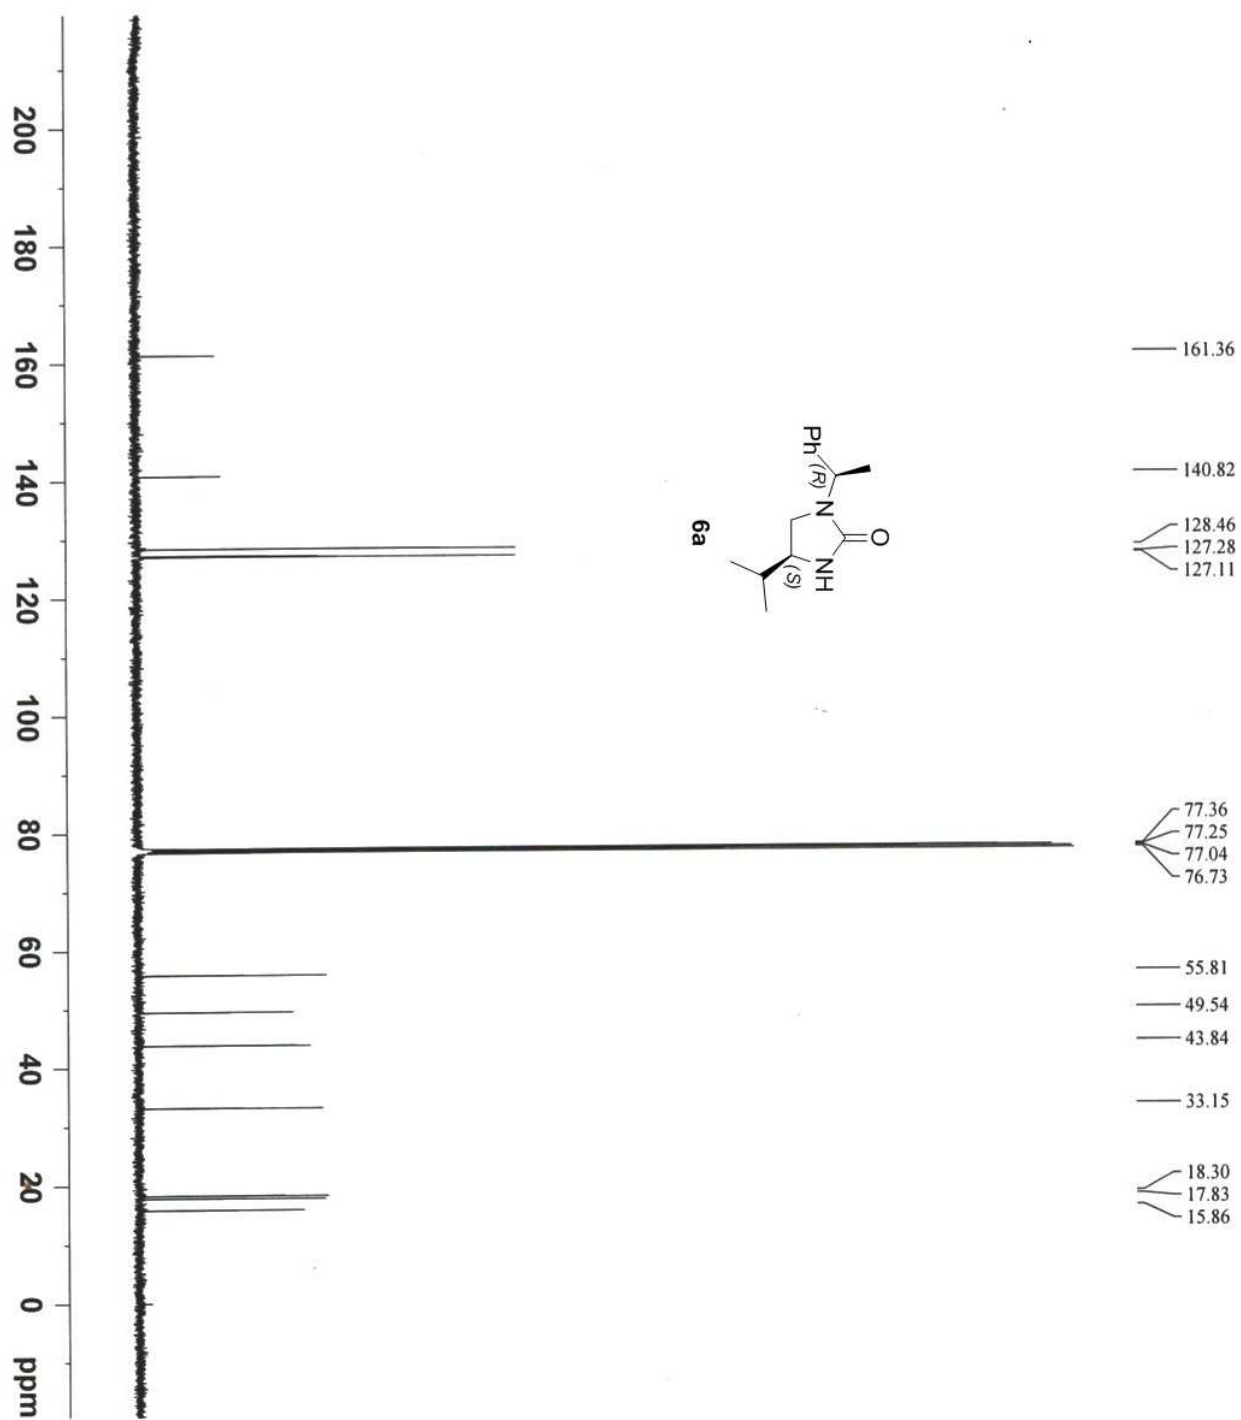

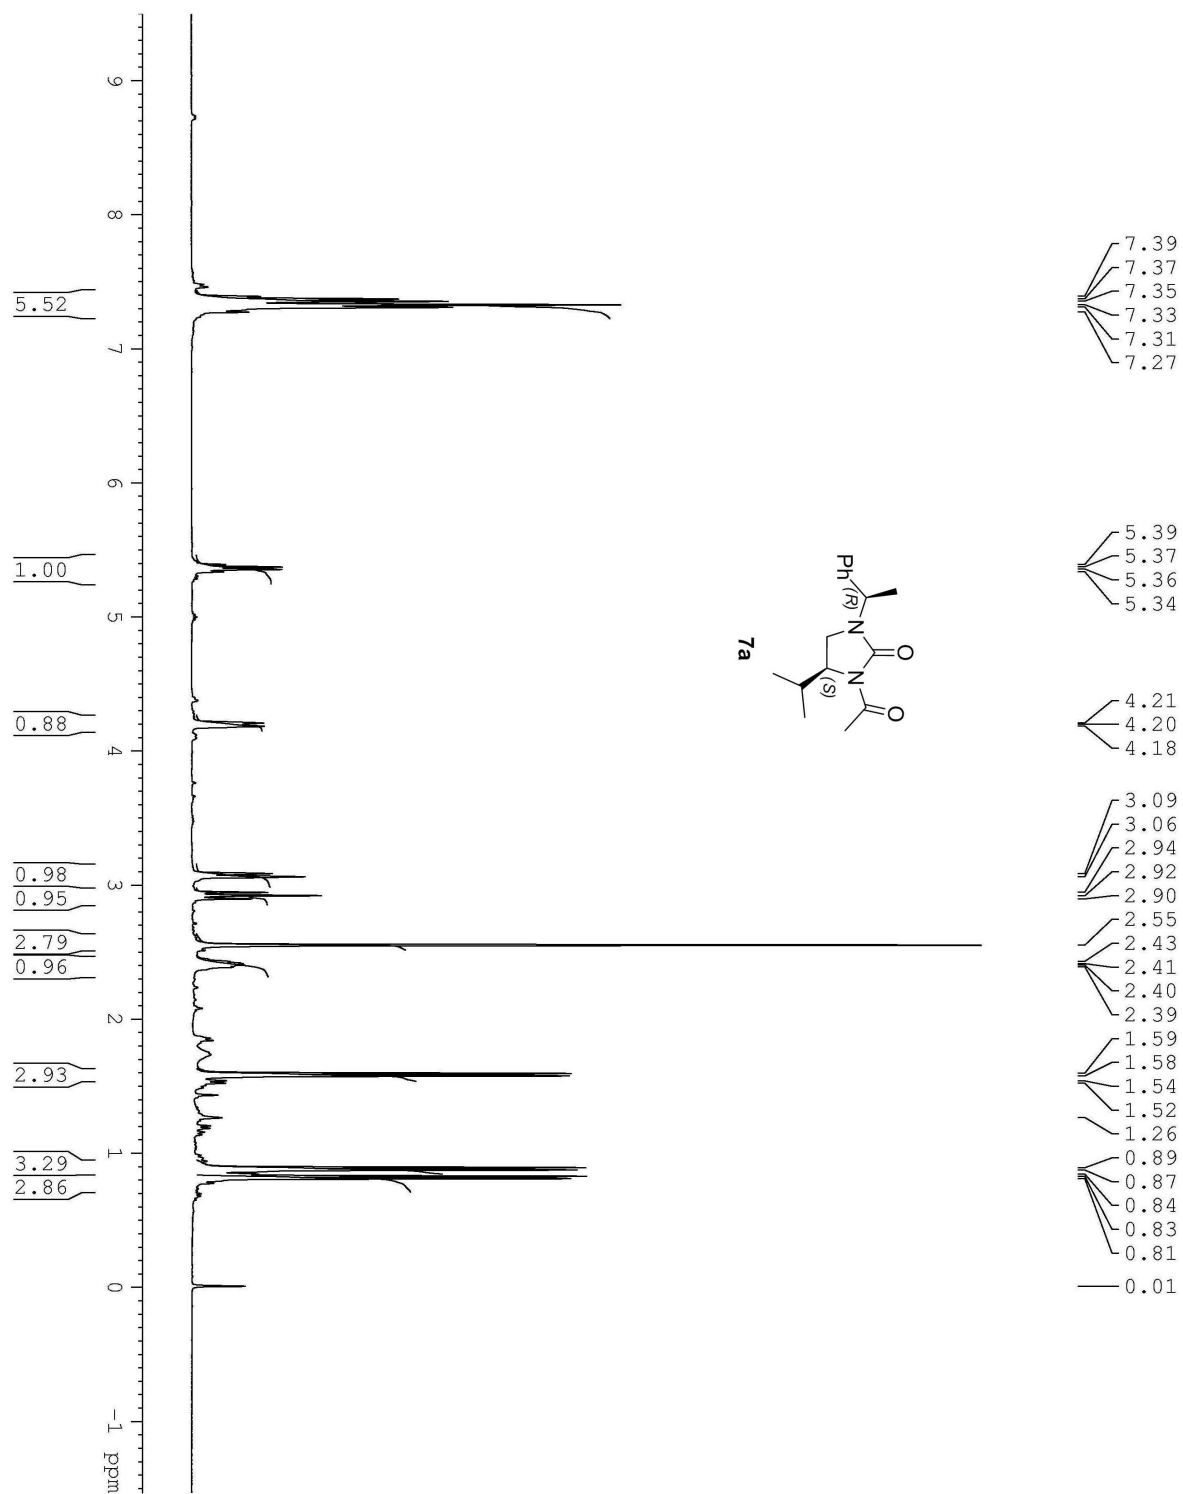

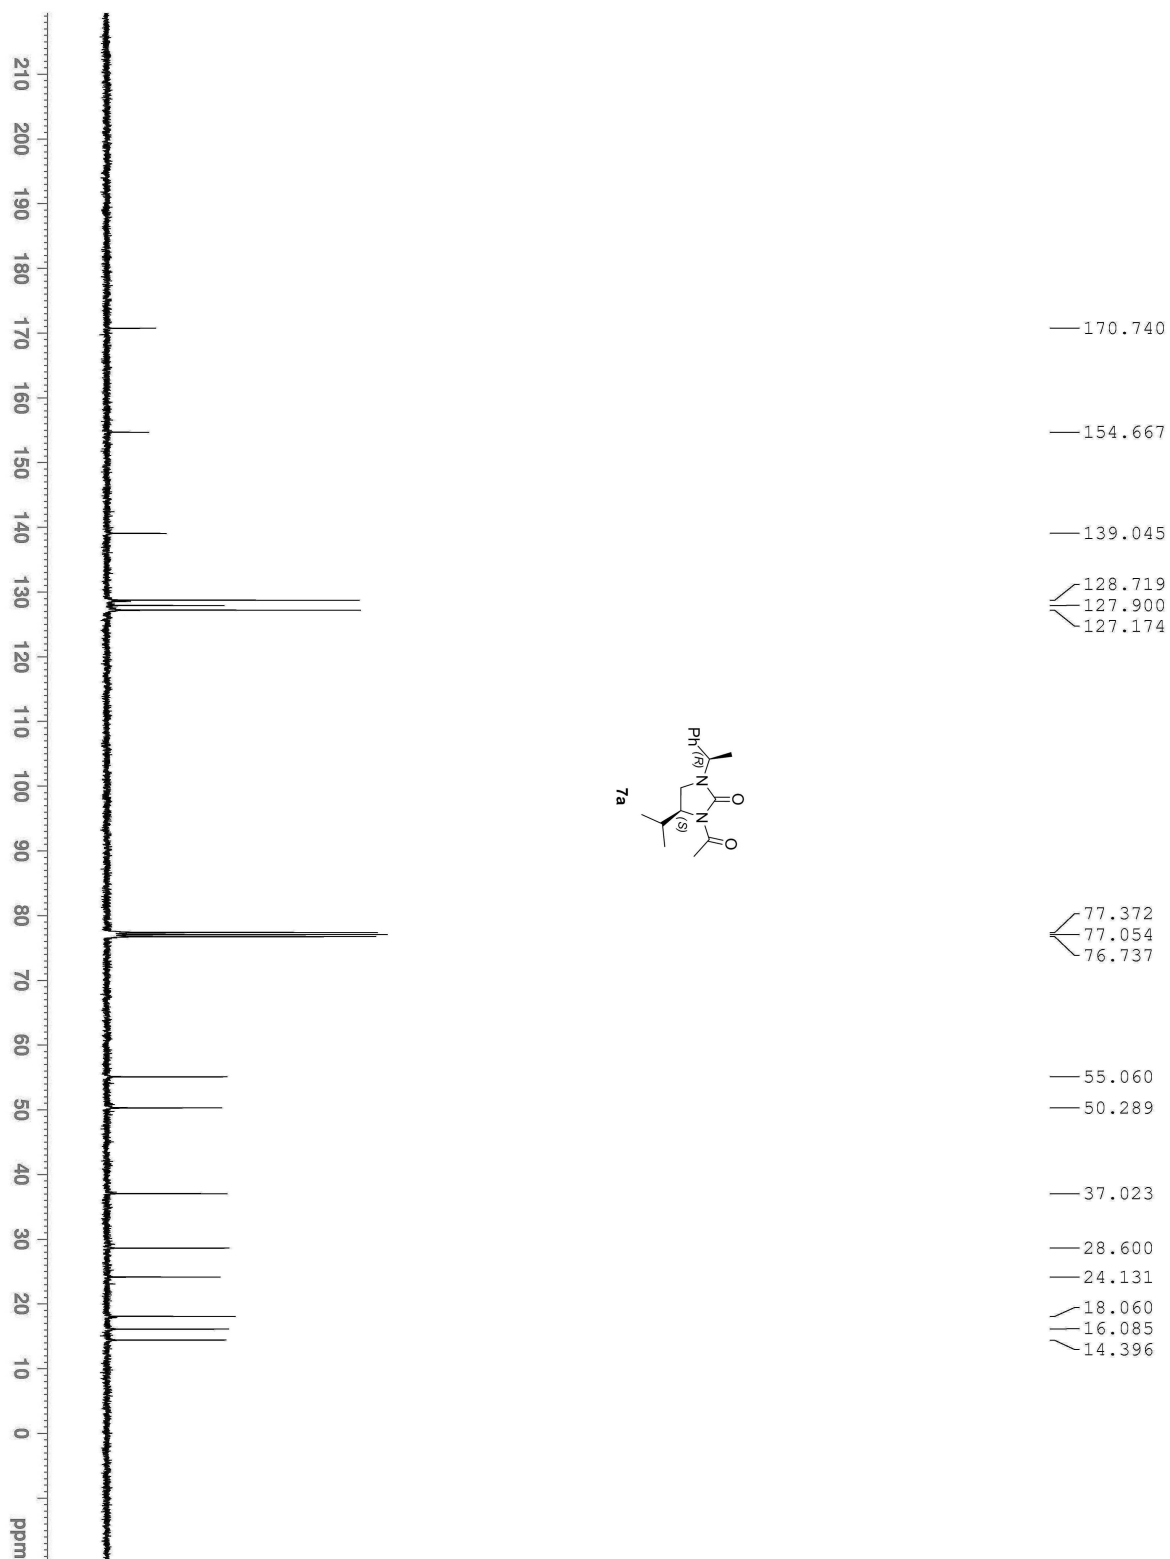

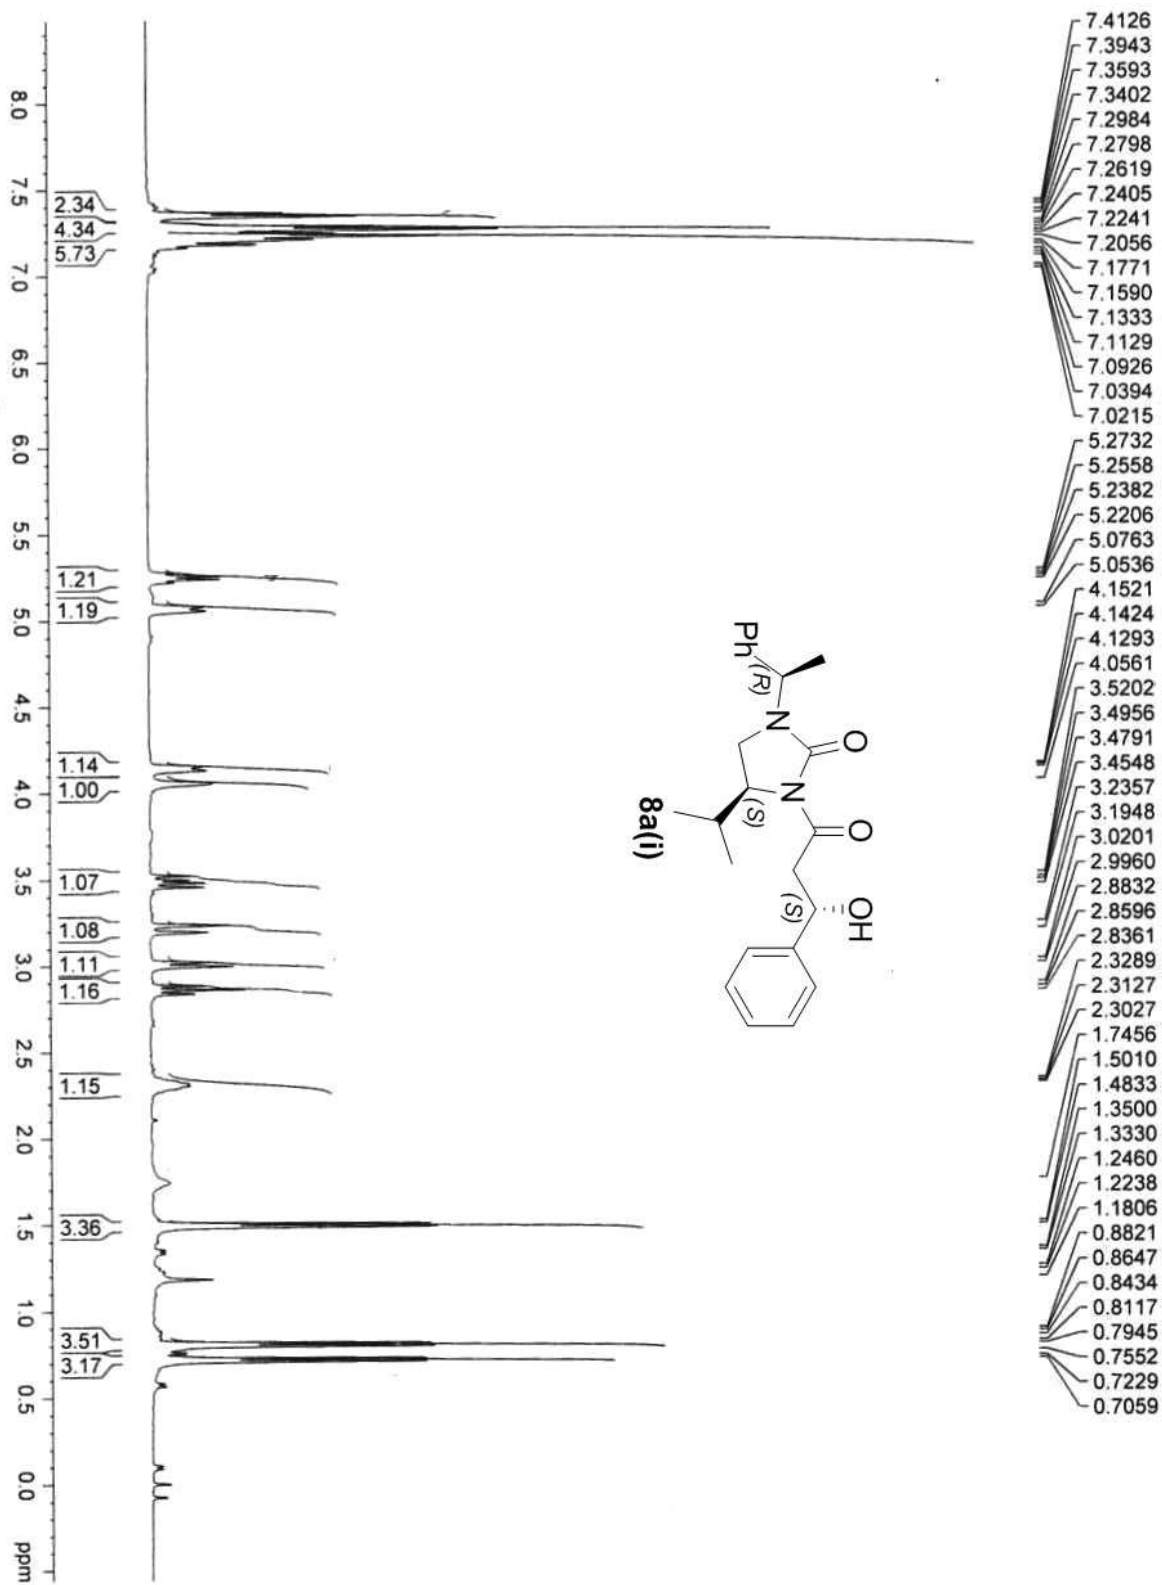

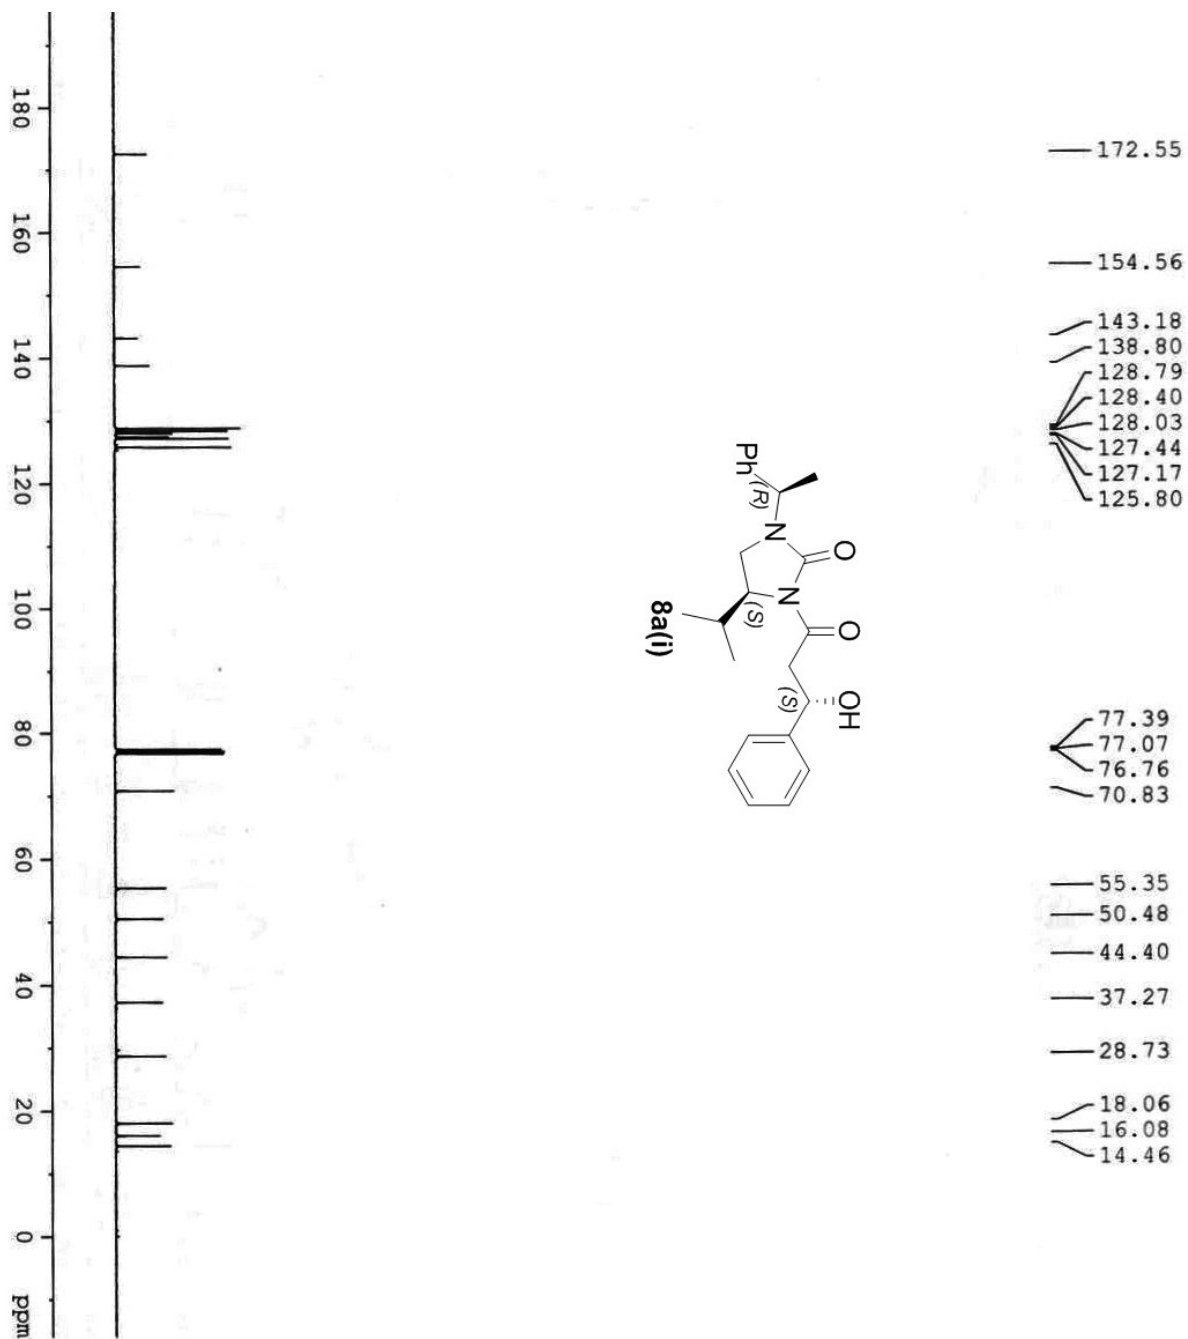

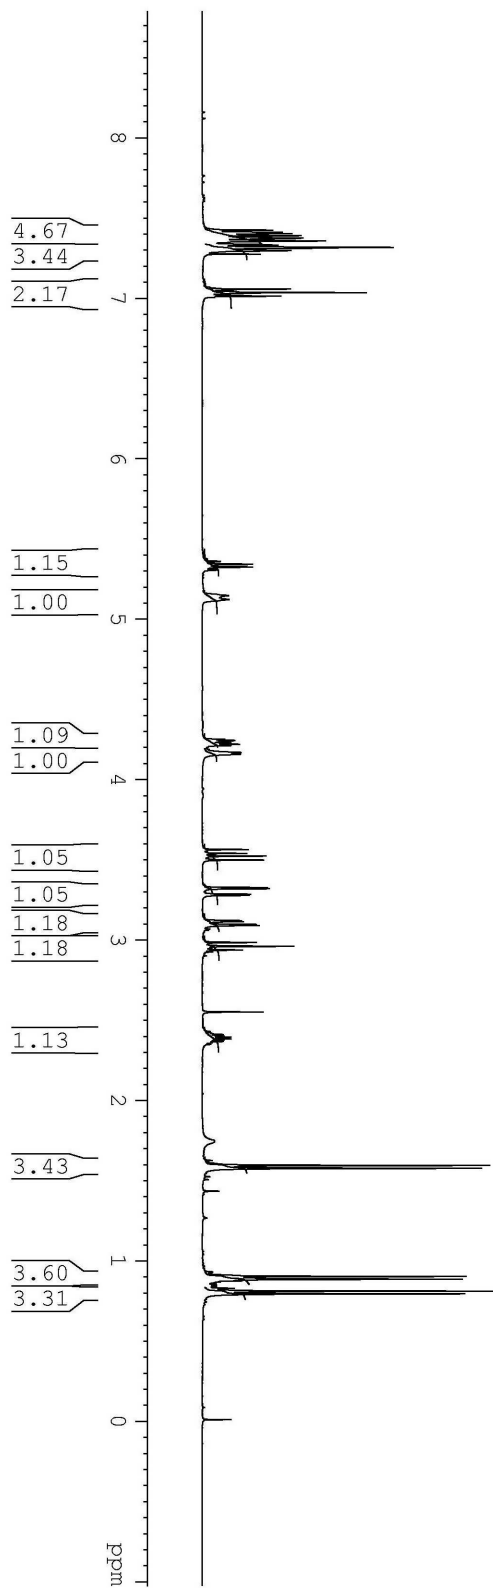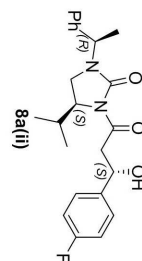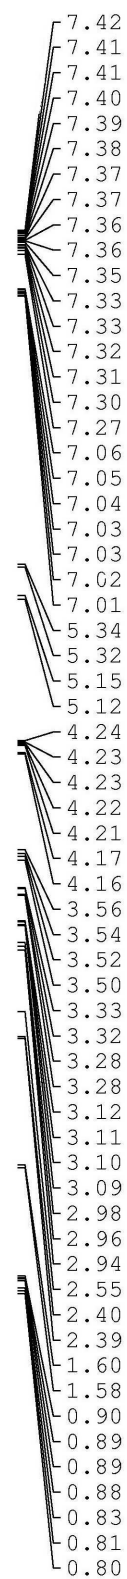

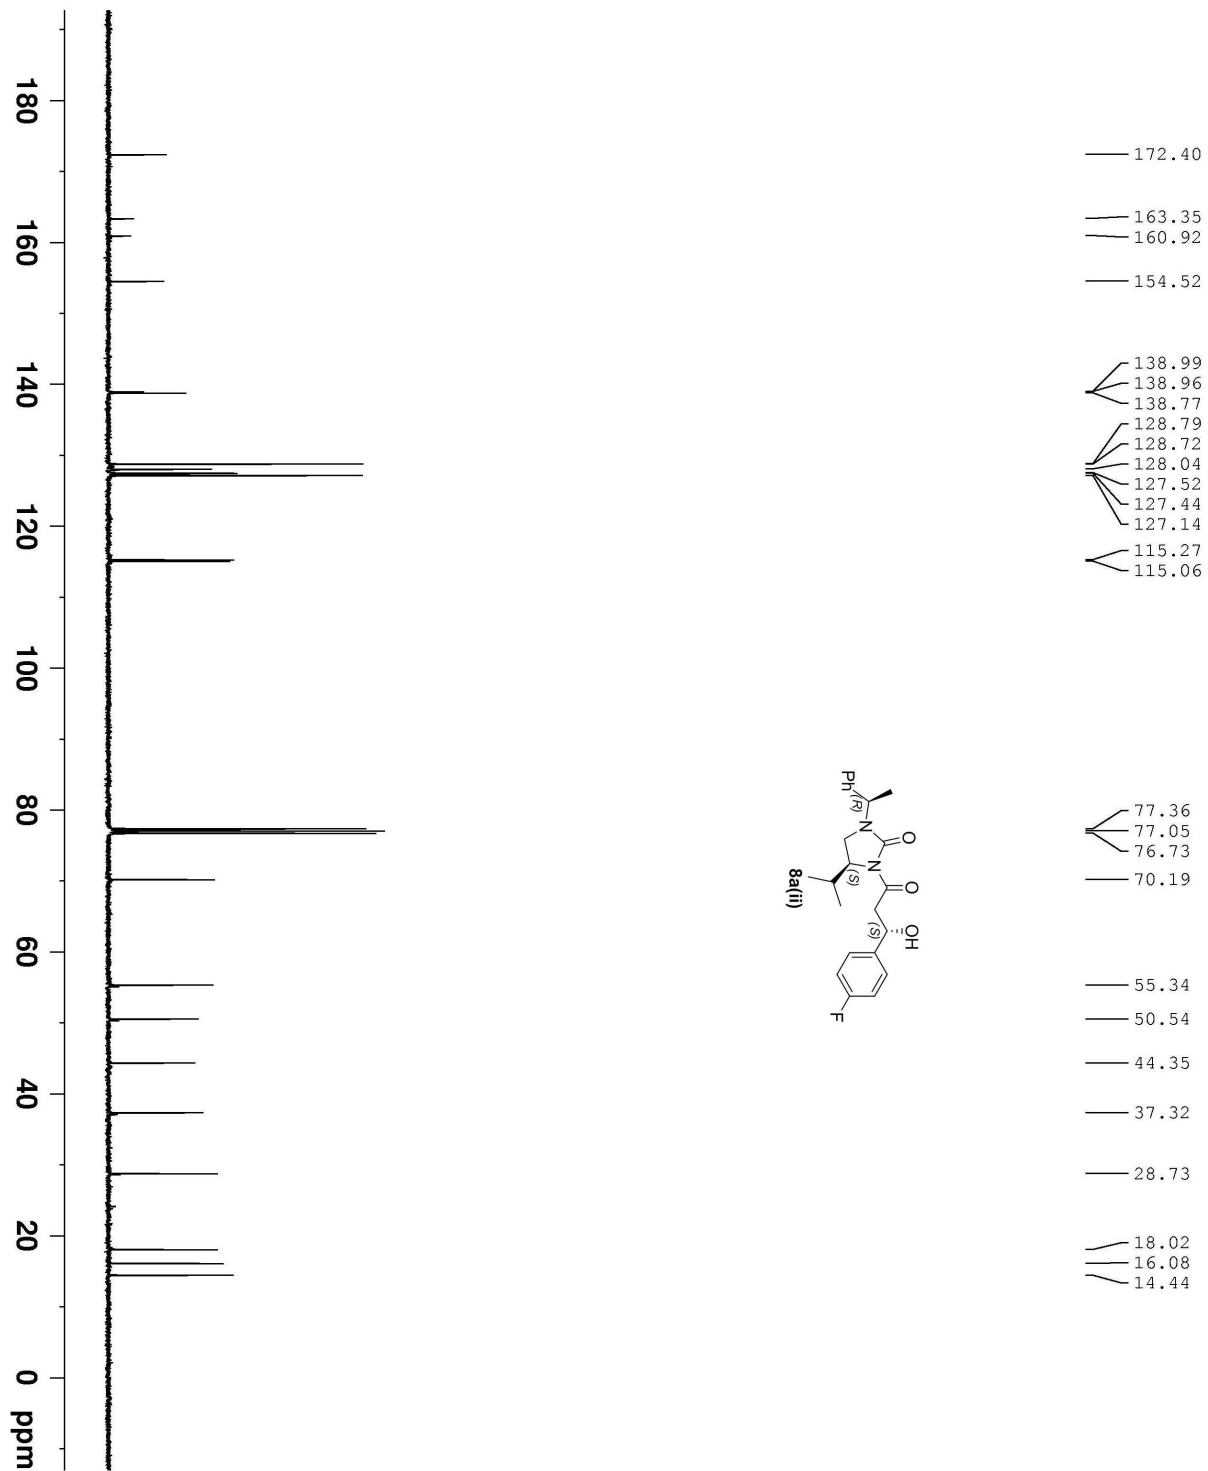

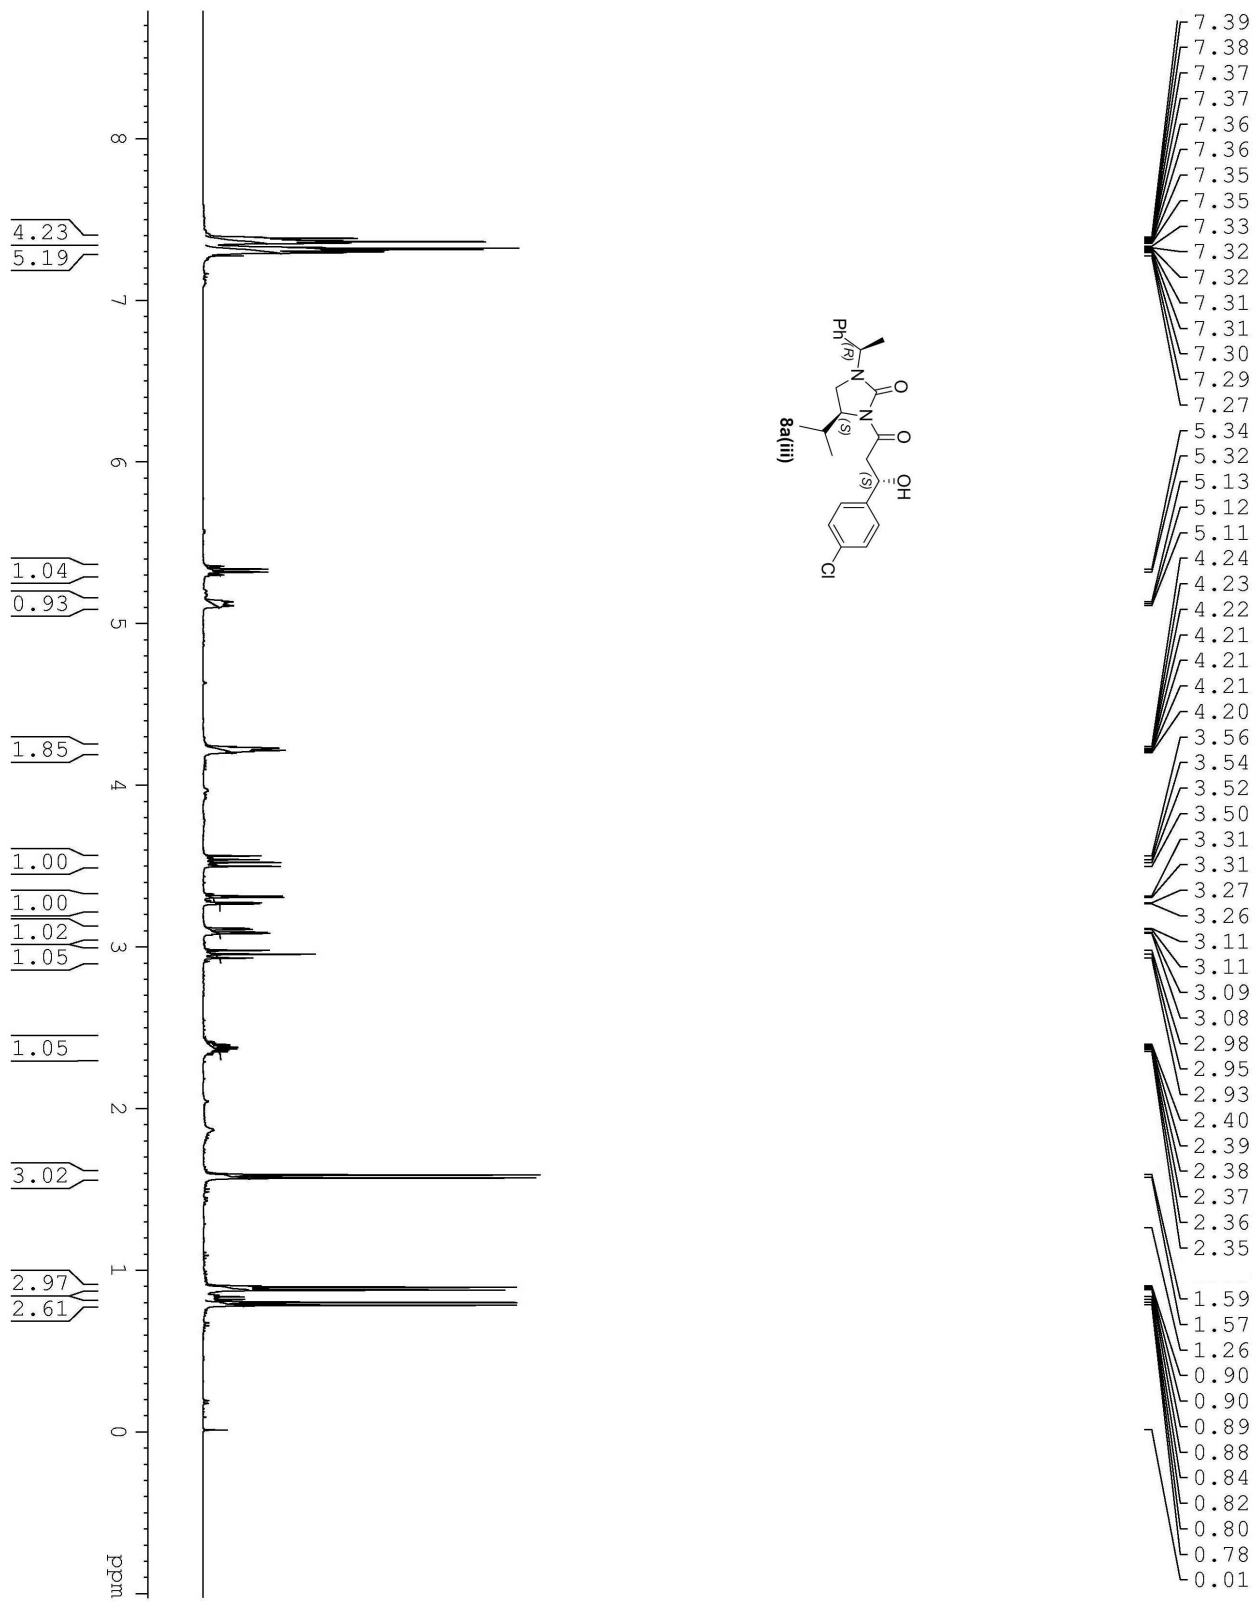



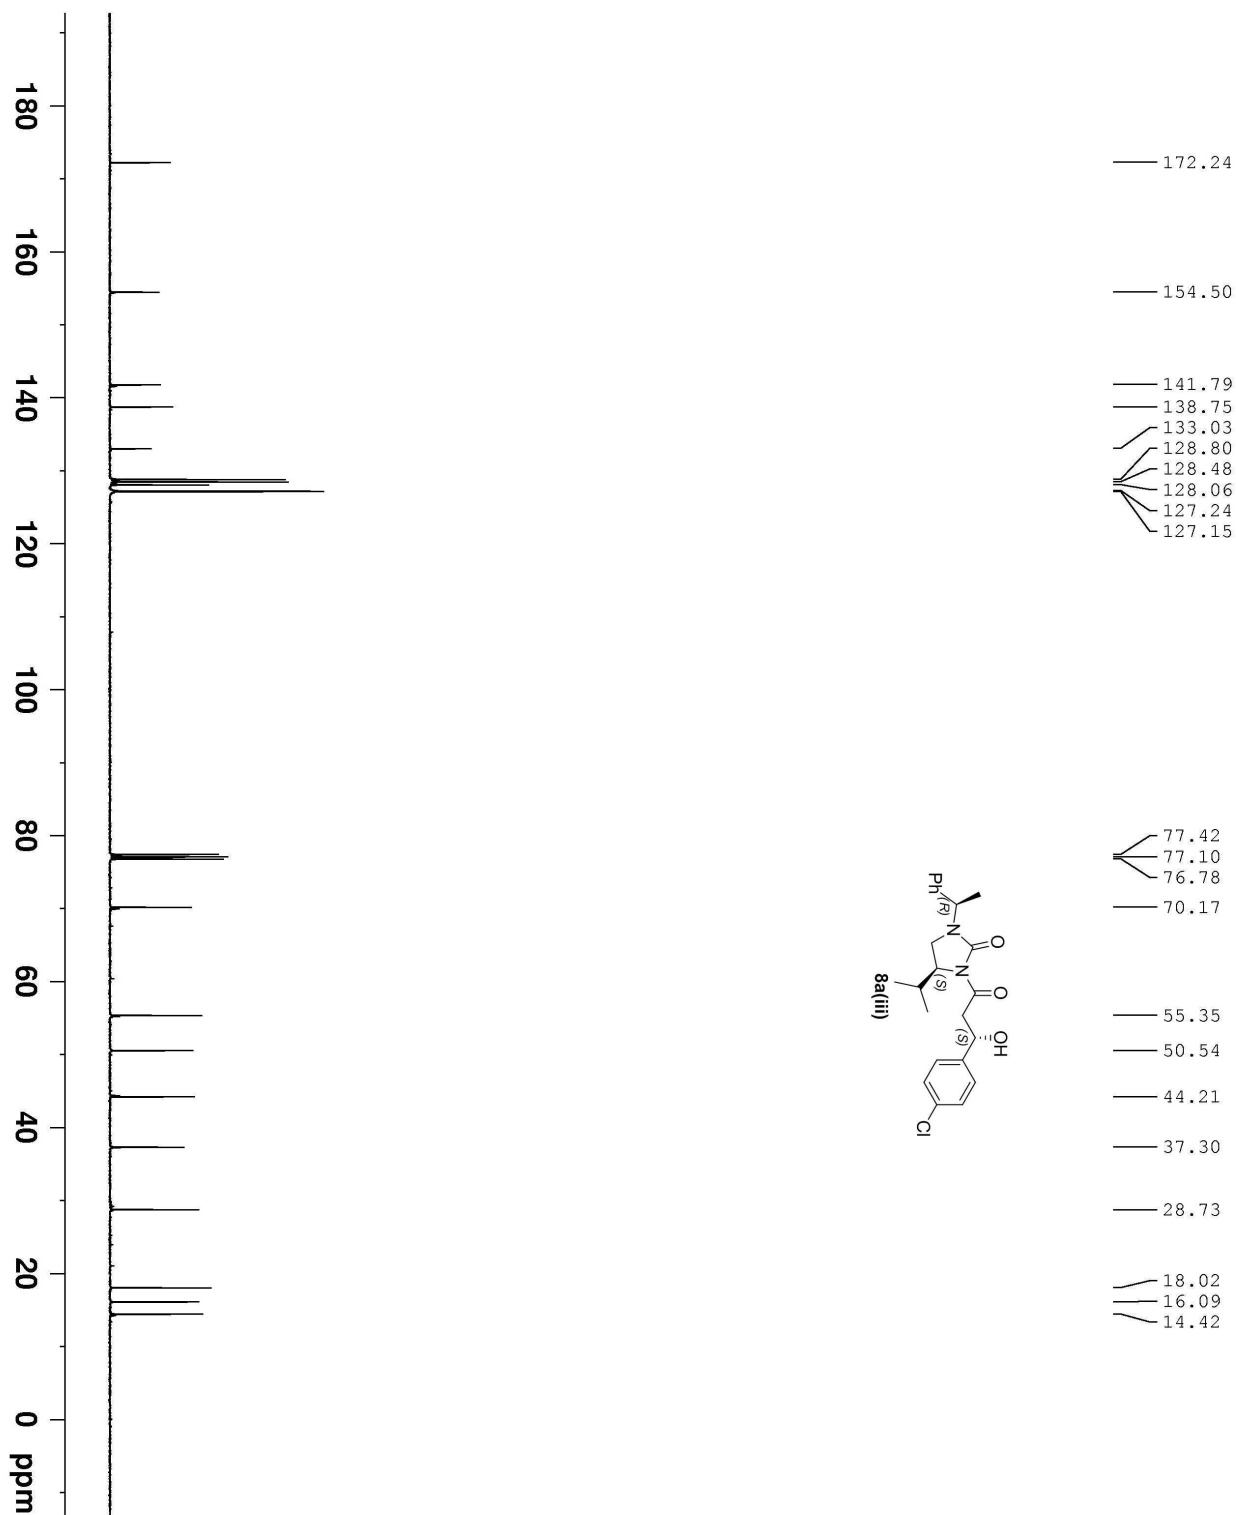

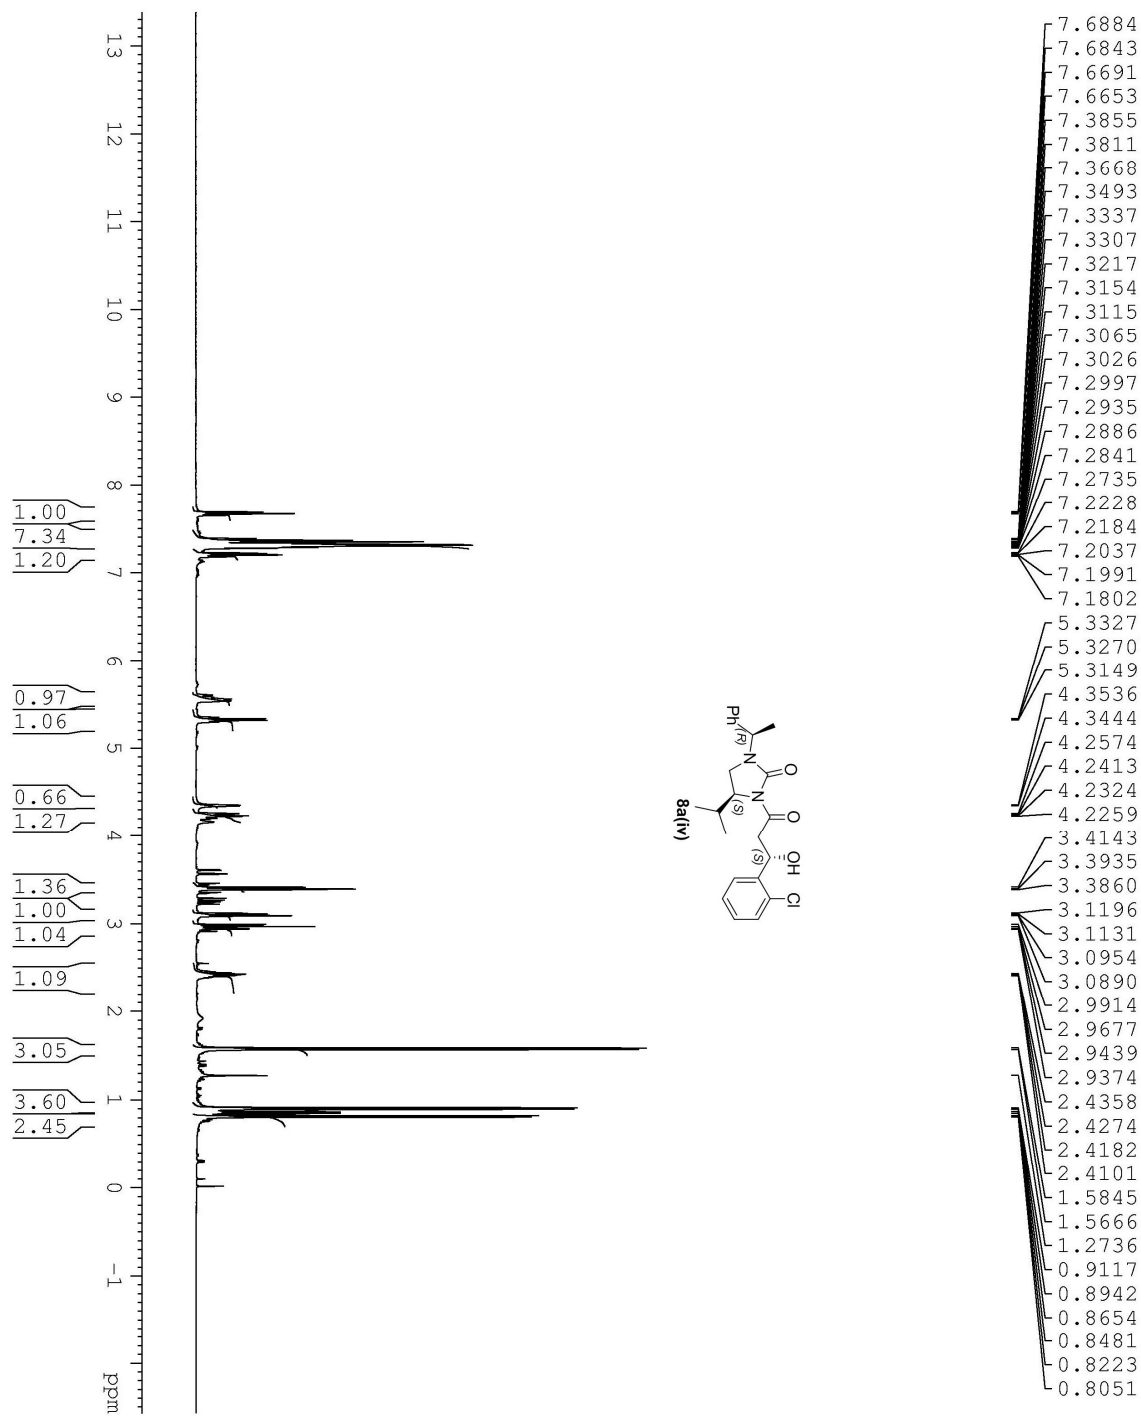

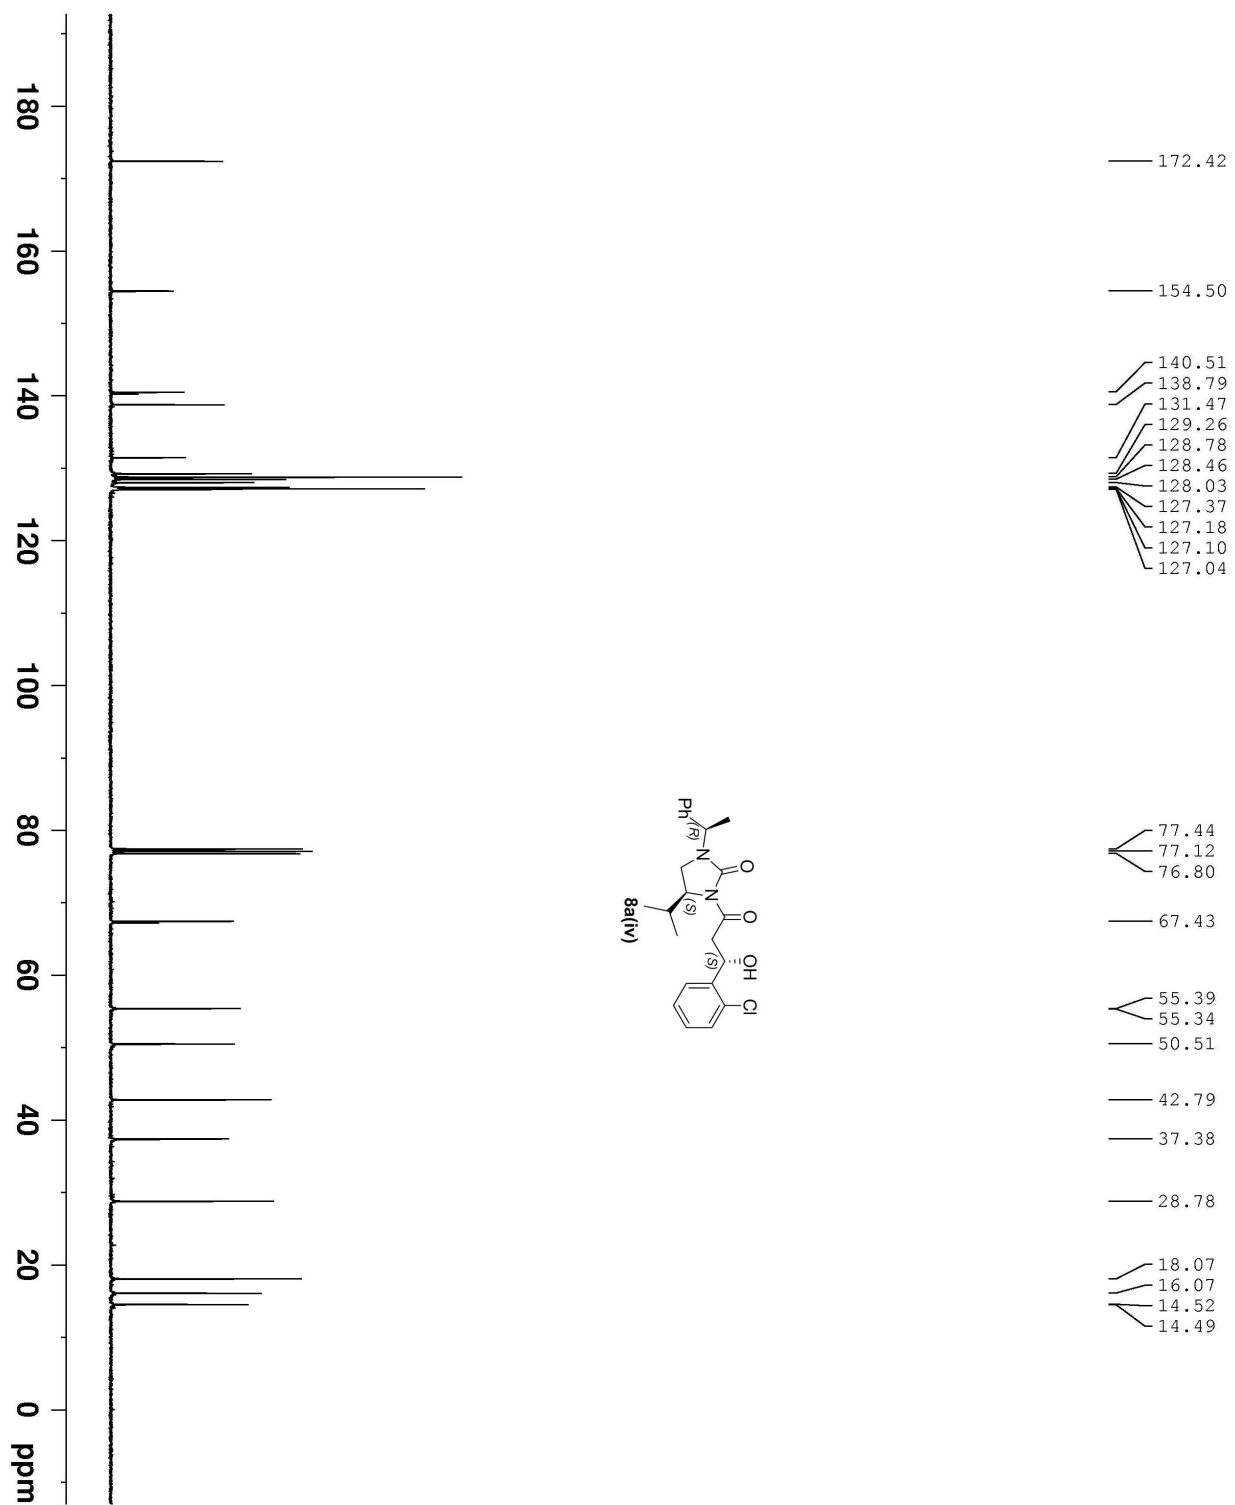

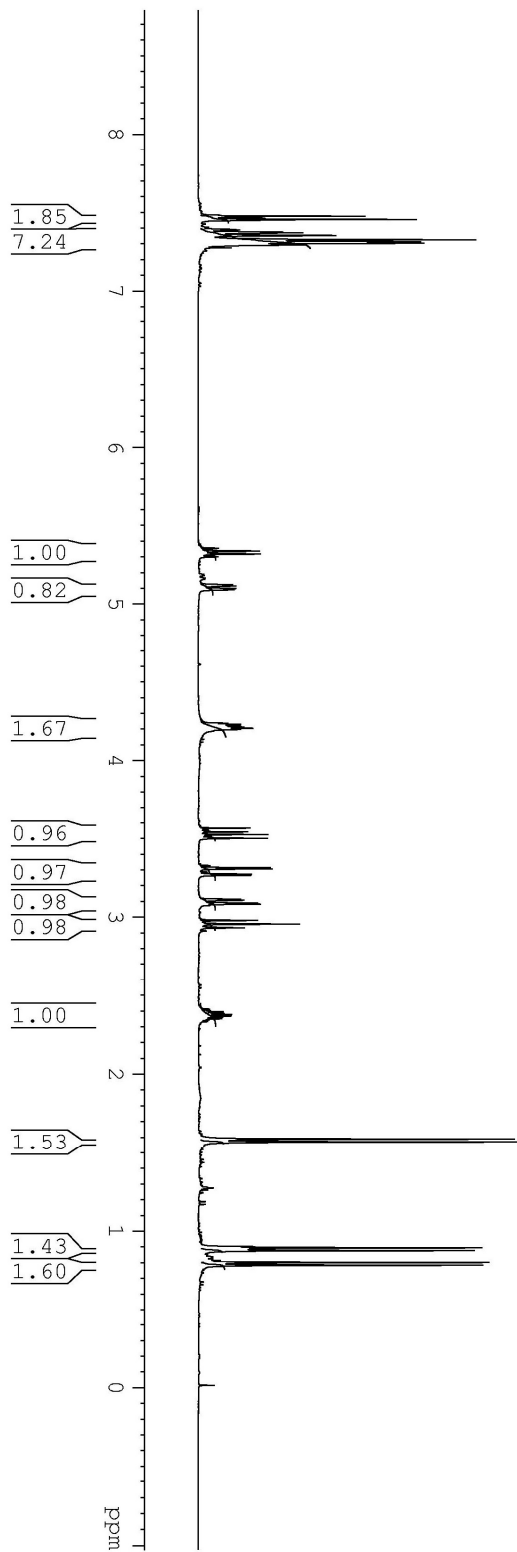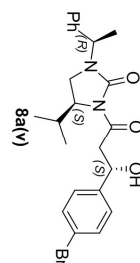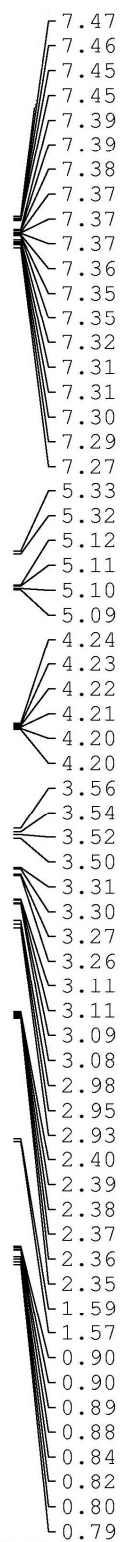

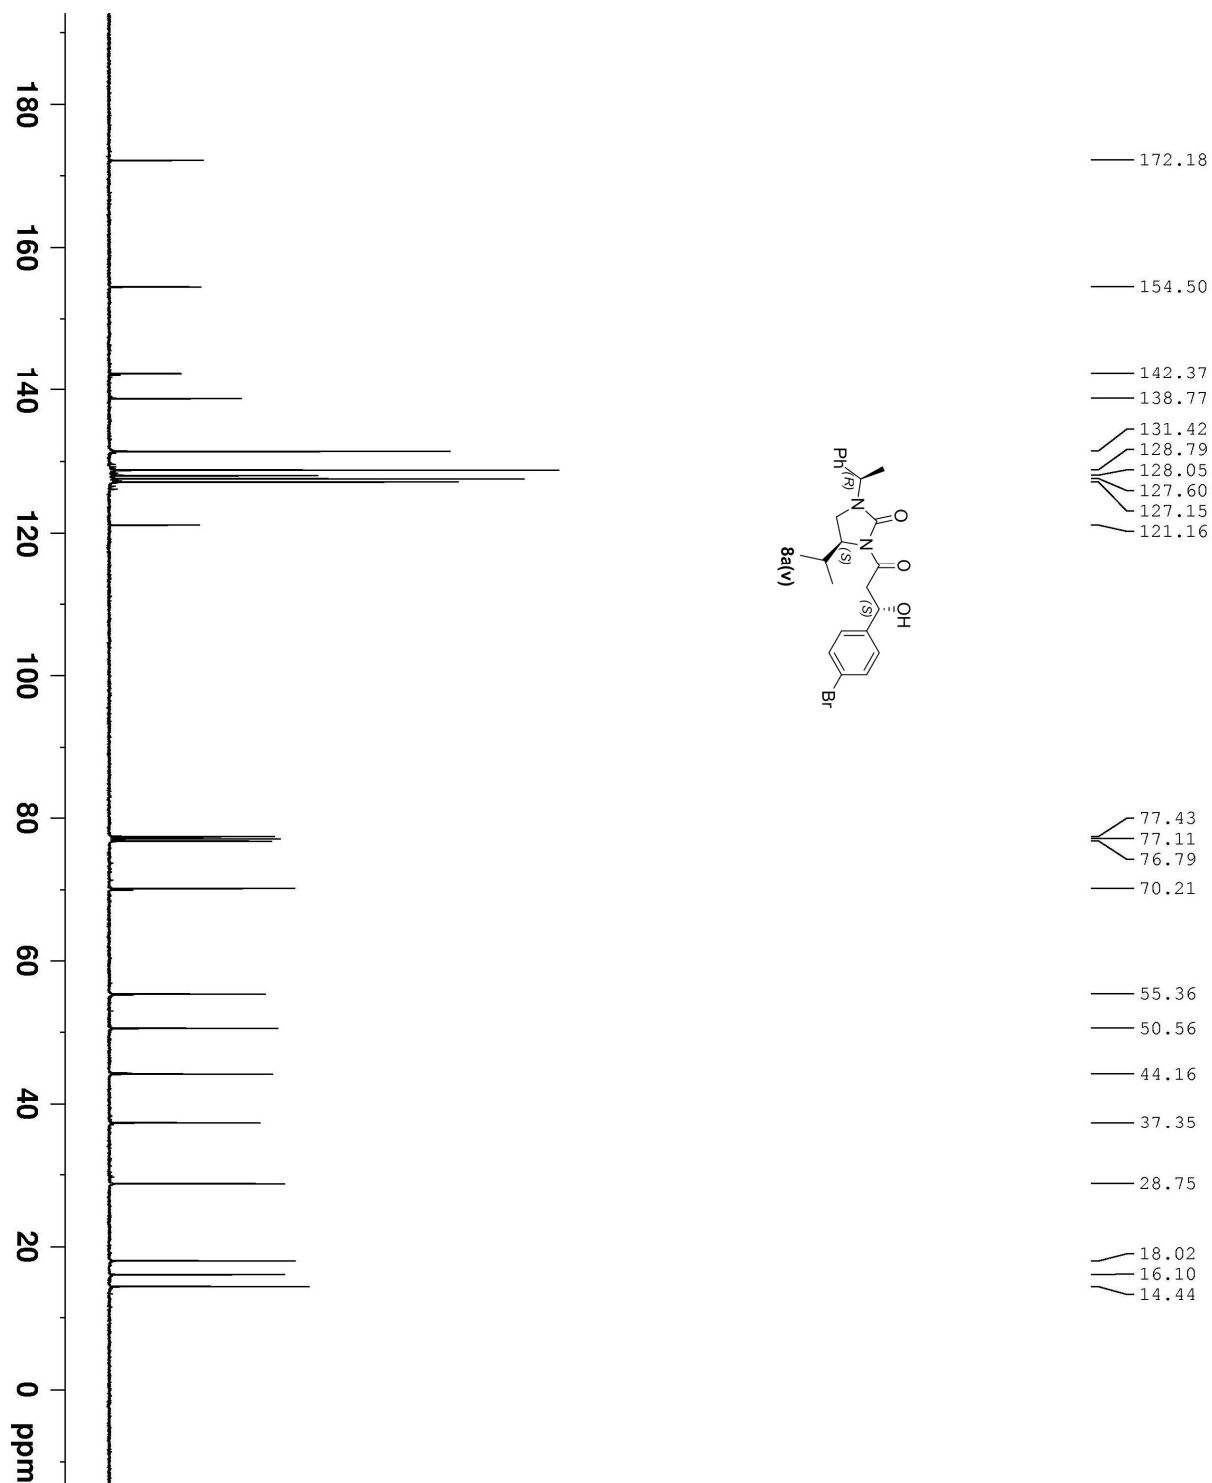

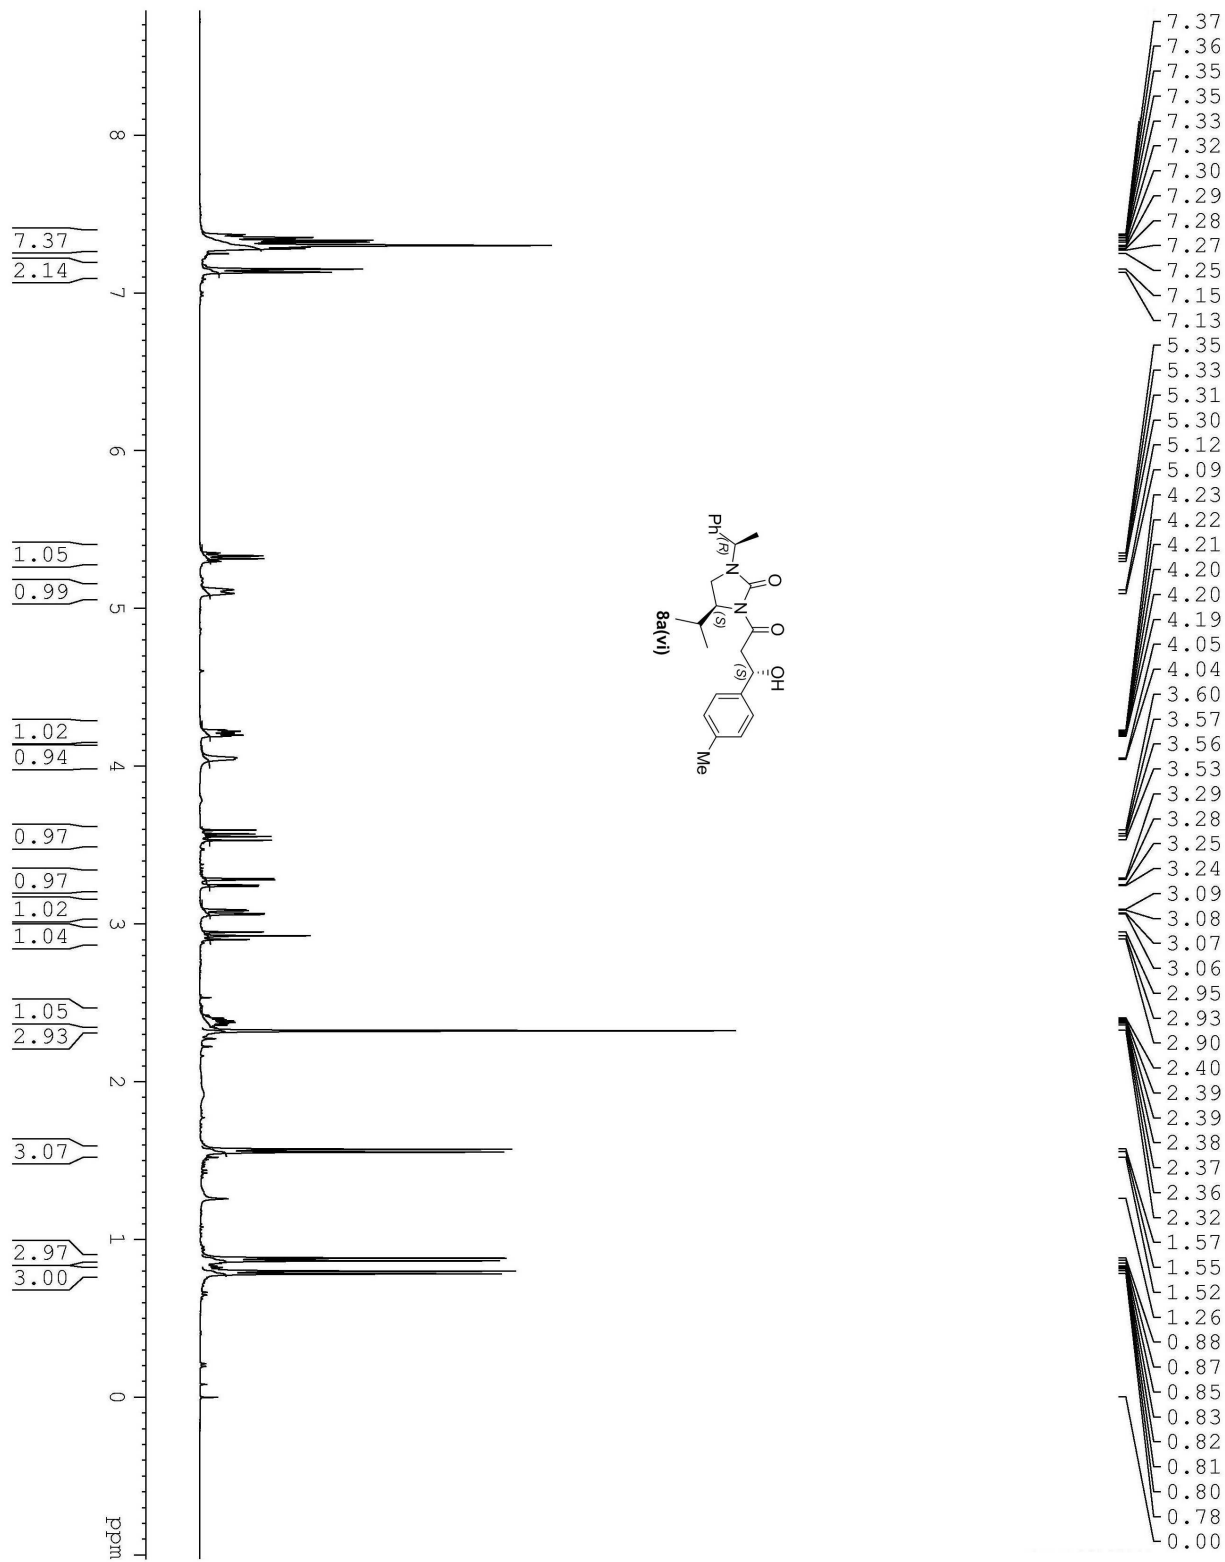

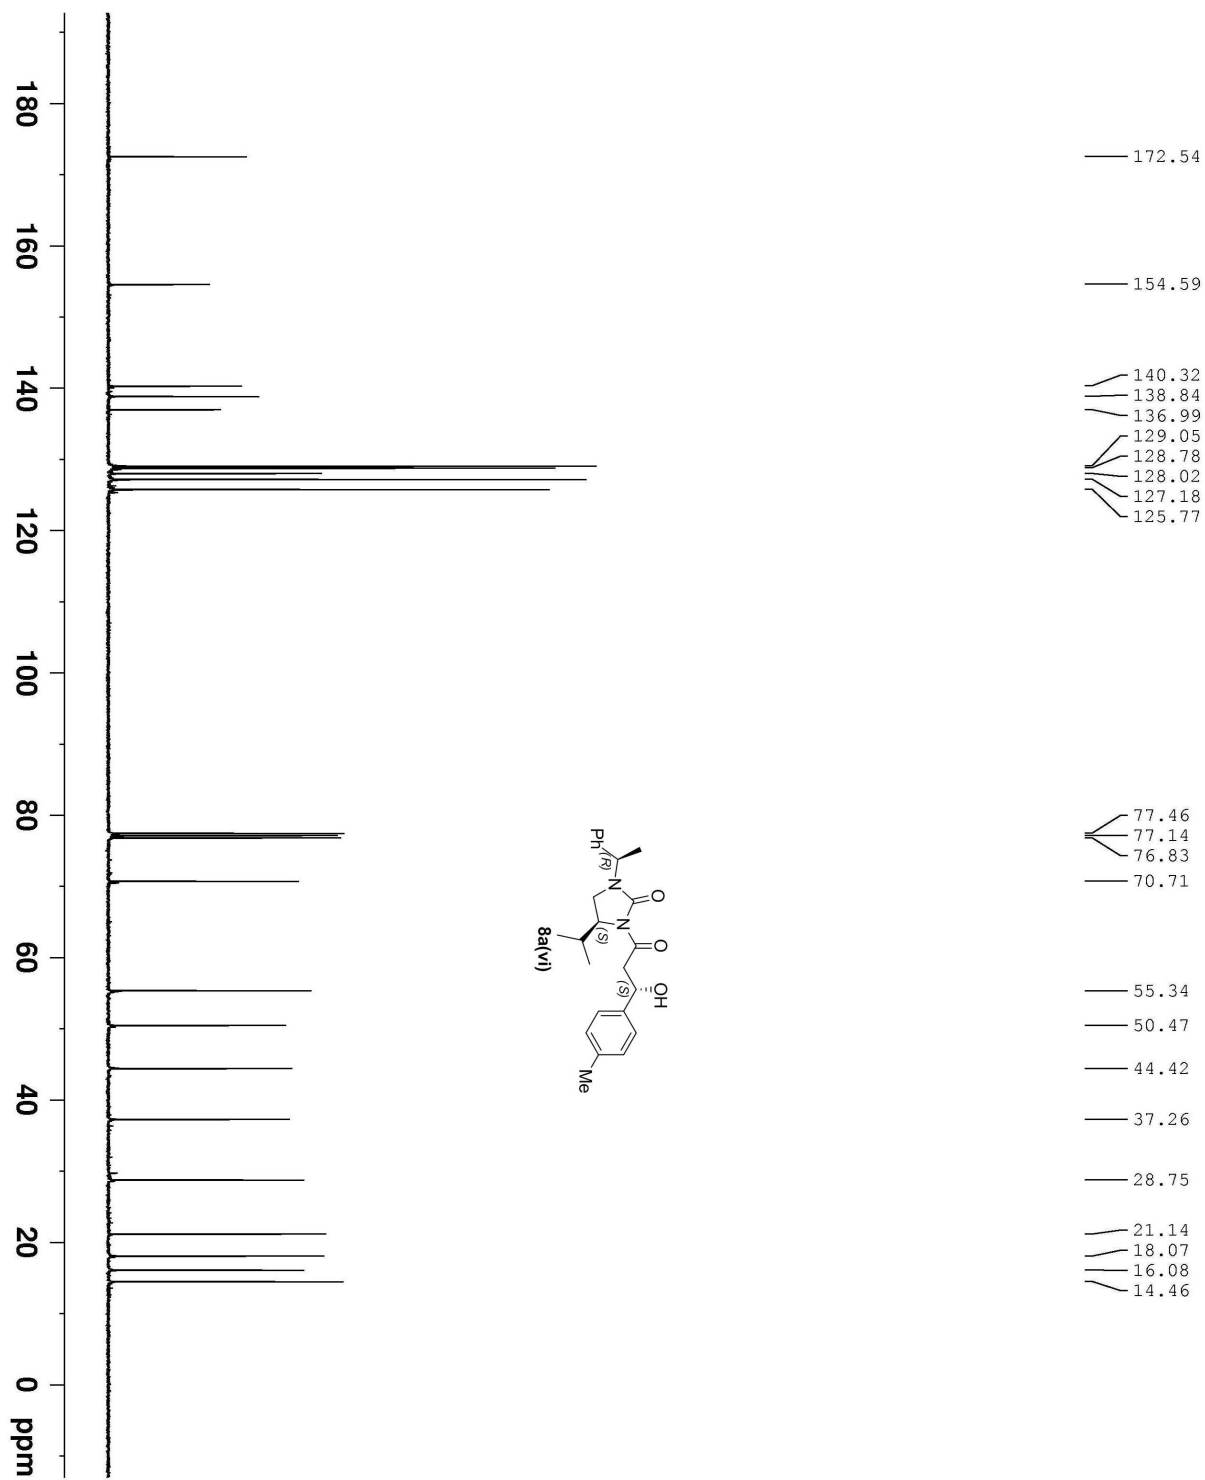

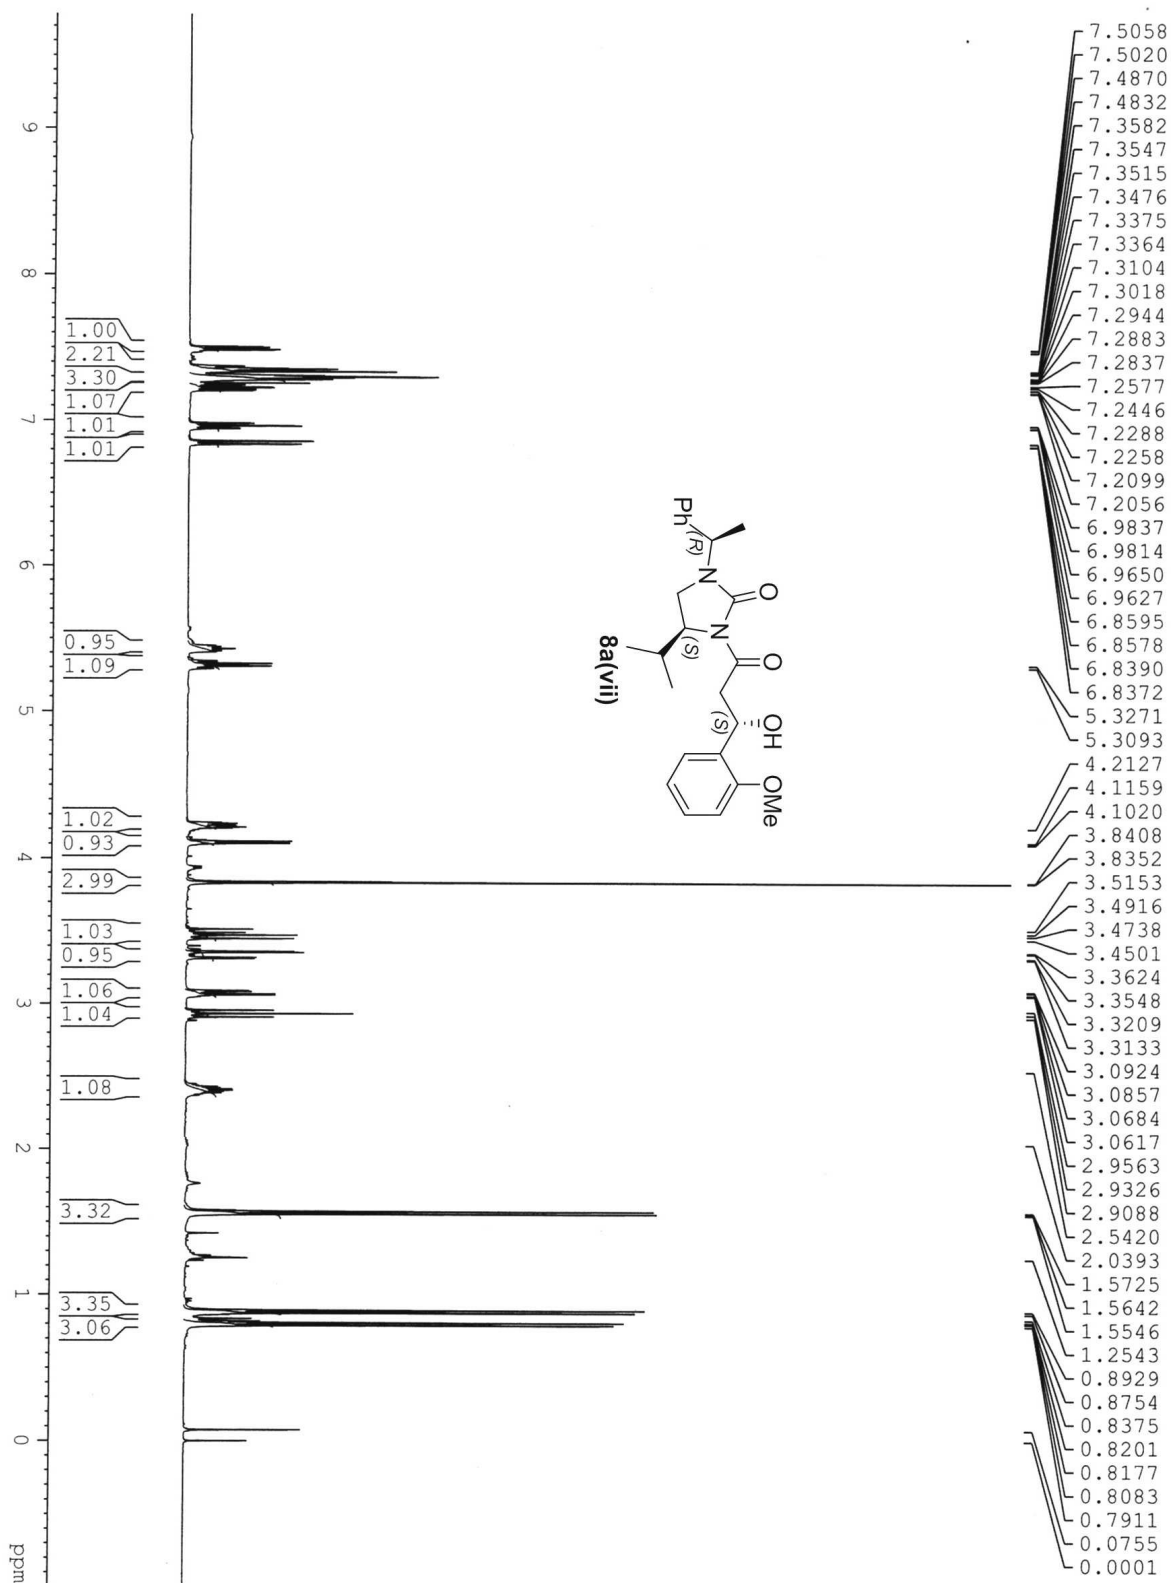



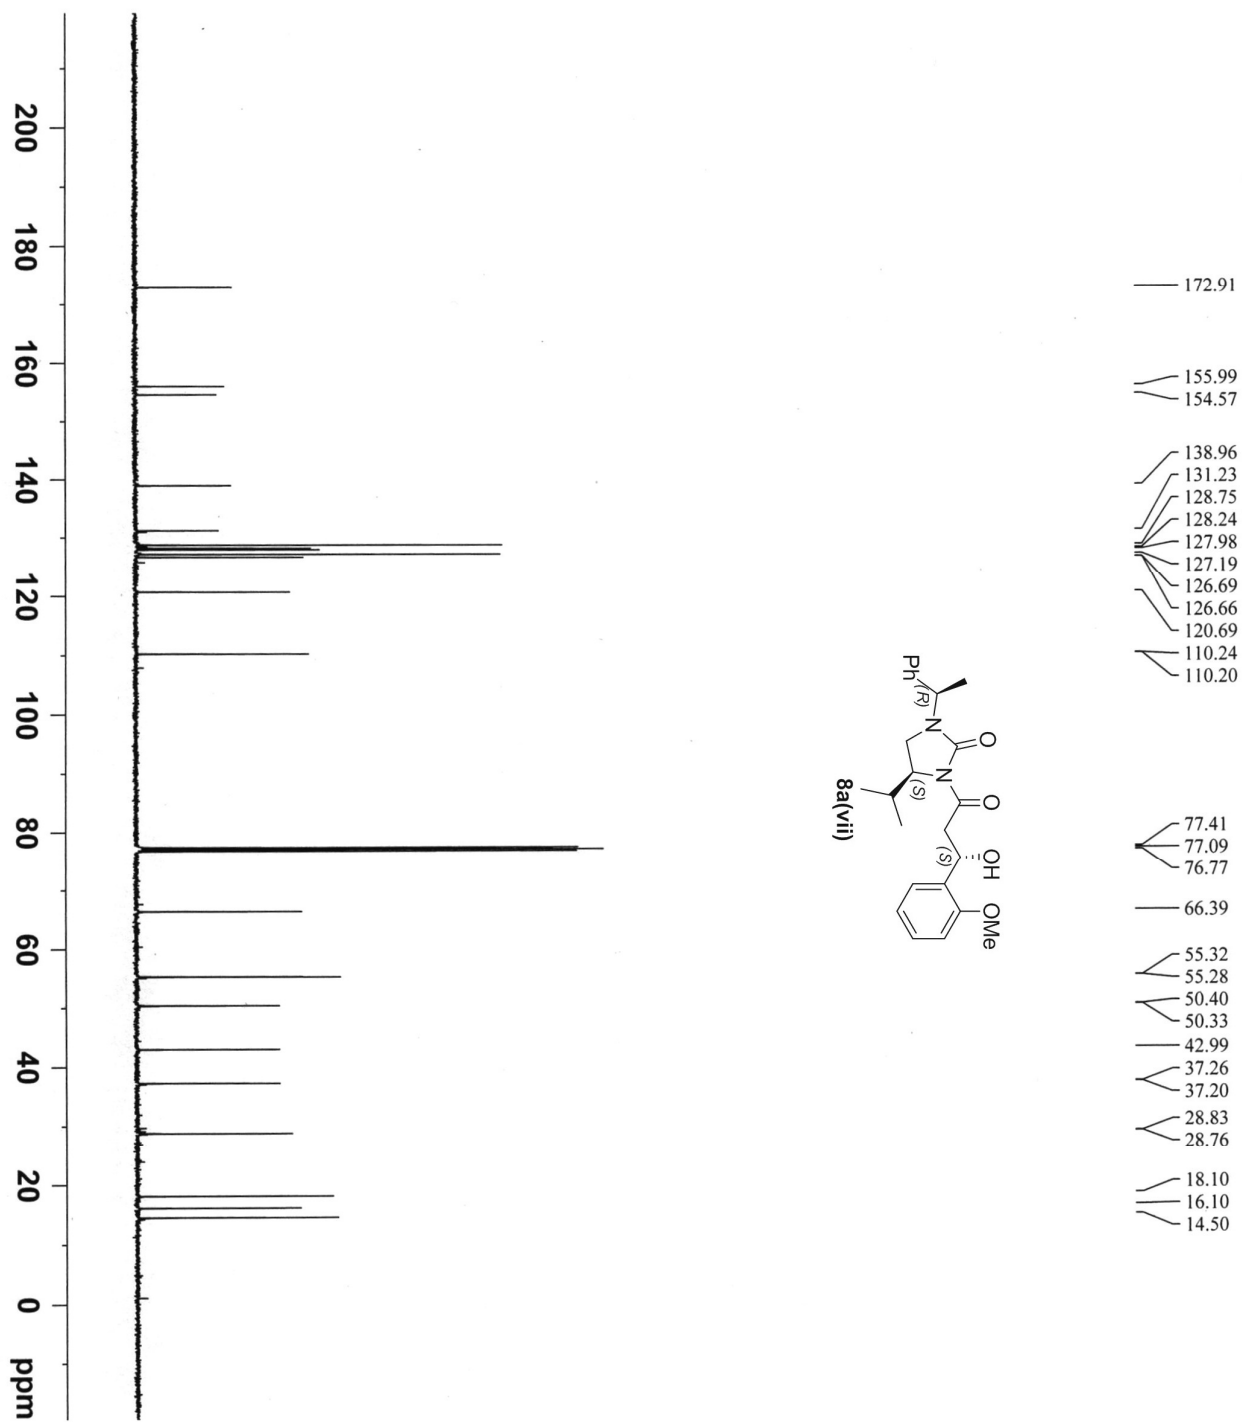

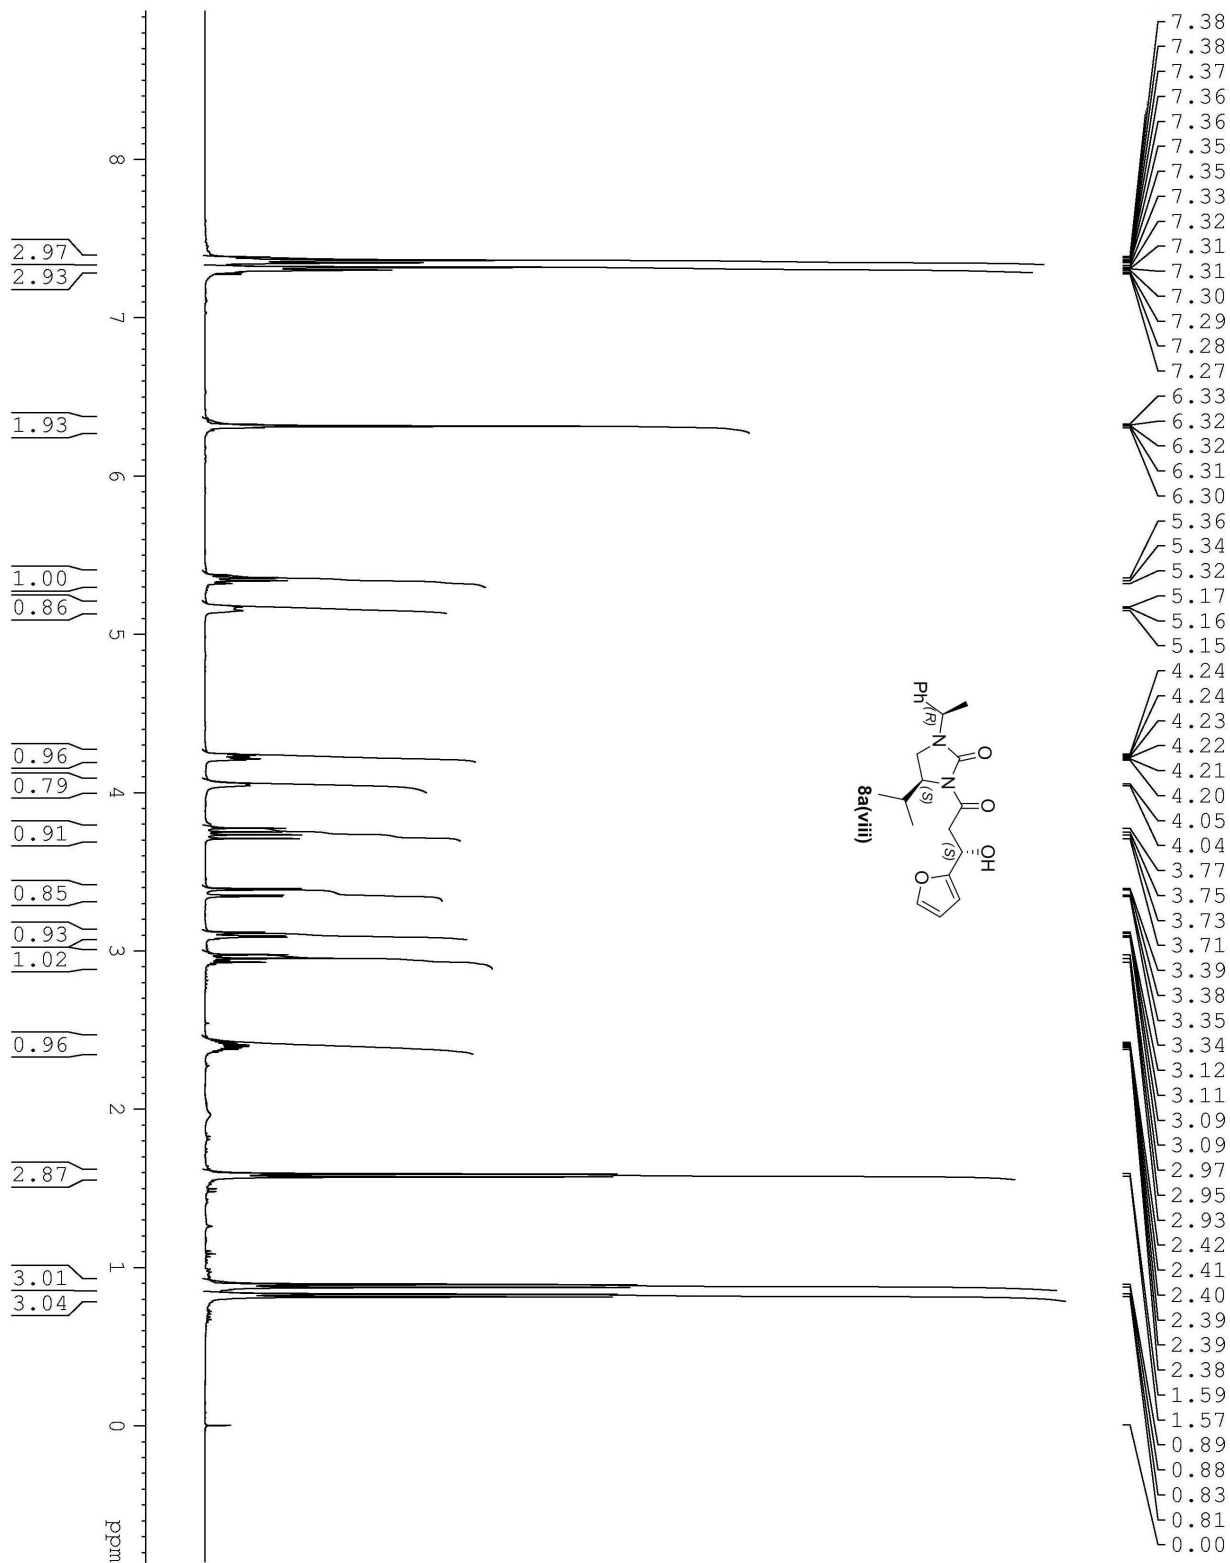

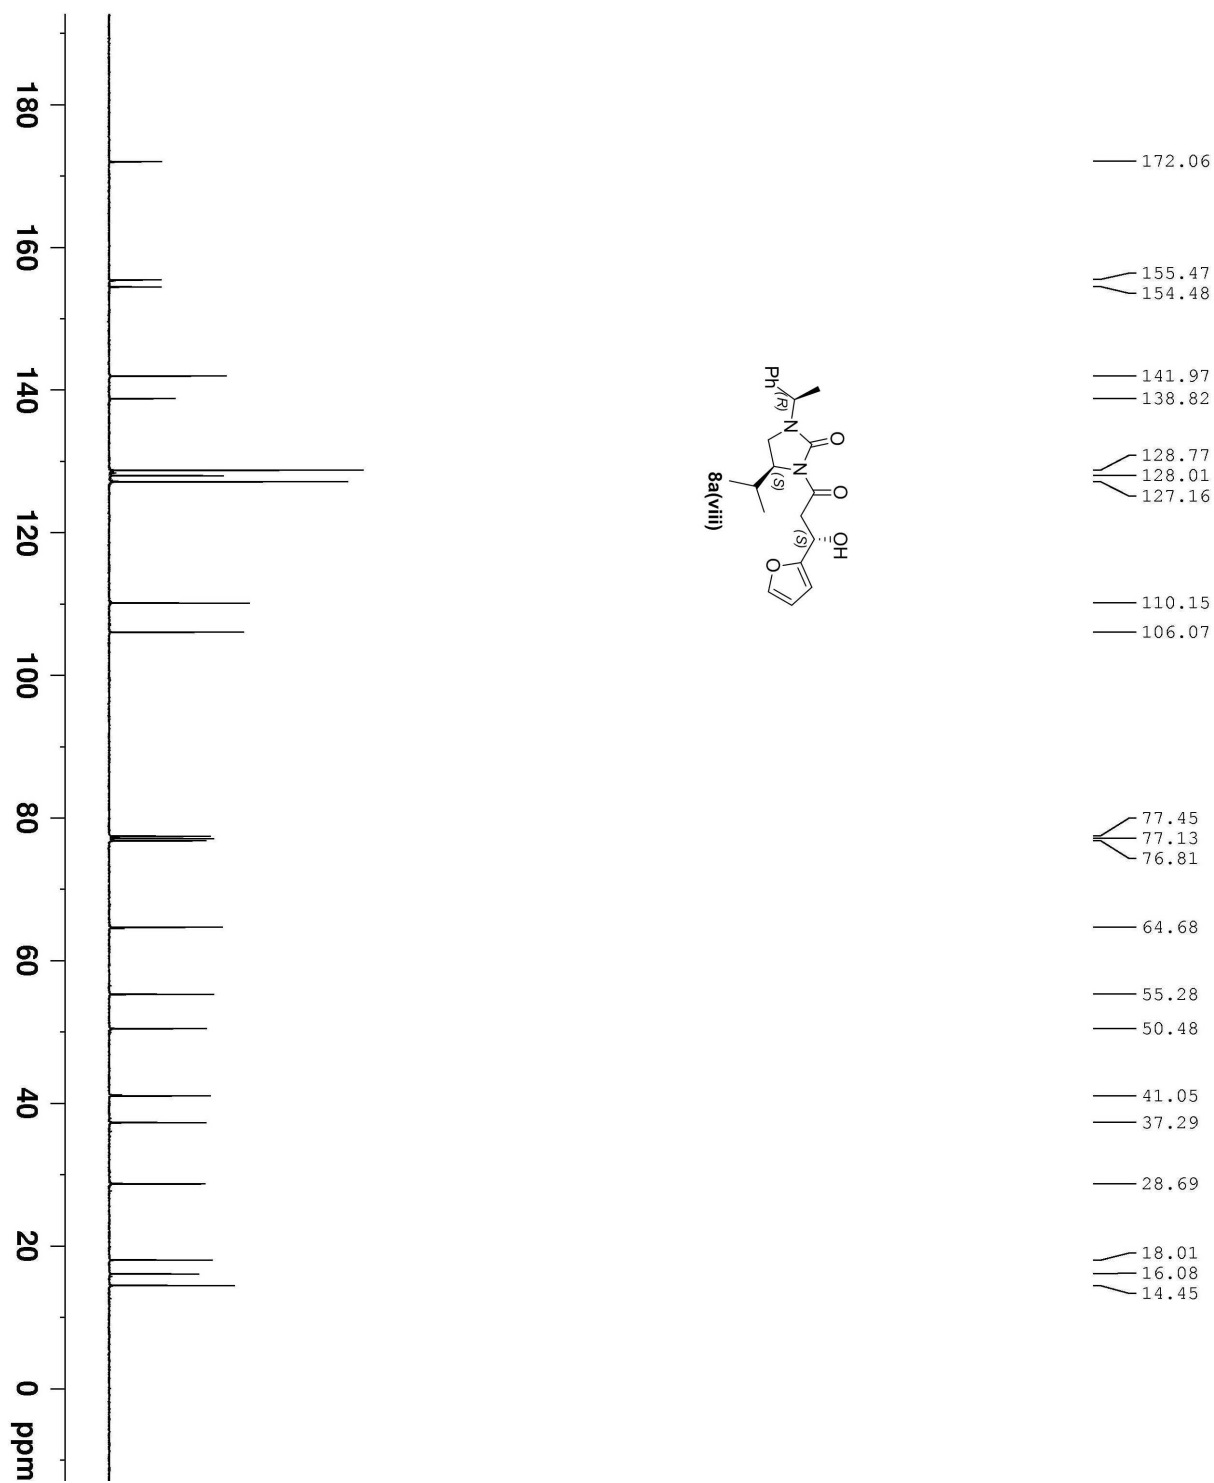

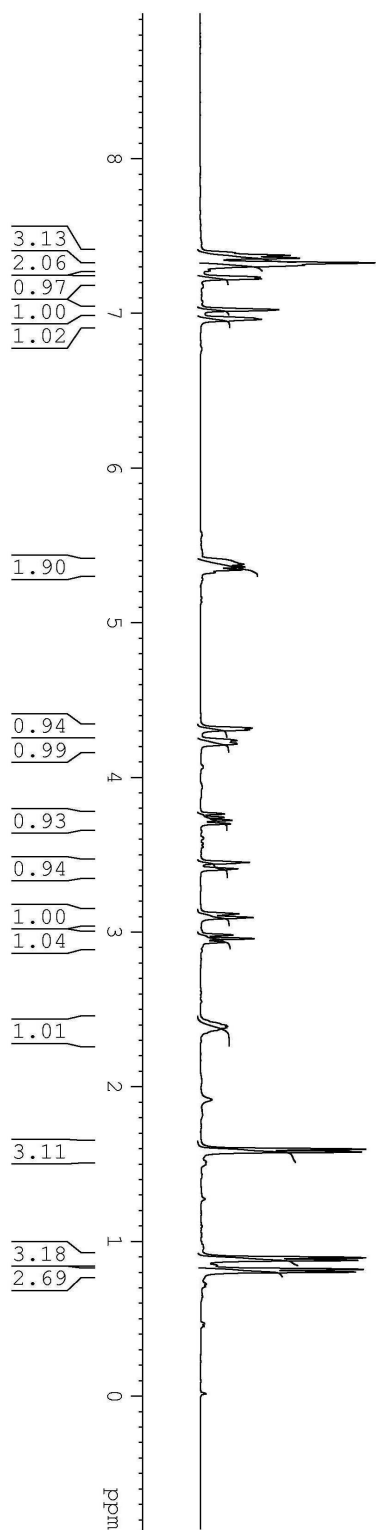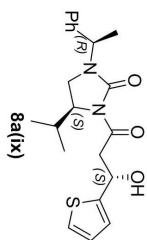

7.39  
7.37  
7.36  
7.32  
7.31  
7.28  
7.23  
7.22  
7.02  
6.97  
6.96

5.38  
5.36  
5.34  
5.32

4.32  
4.31  
4.24  
4.23  
4.21

3.76  
3.74  
3.72  
3.70  
3.45  
3.41  
3.12  
3.09

2.98  
2.96  
2.93  
2.41  
2.40  
2.39  
2.38

1.91  
1.60  
1.58  
1.52

0.90  
0.88  
0.84  
0.82  
0.80  
0.73

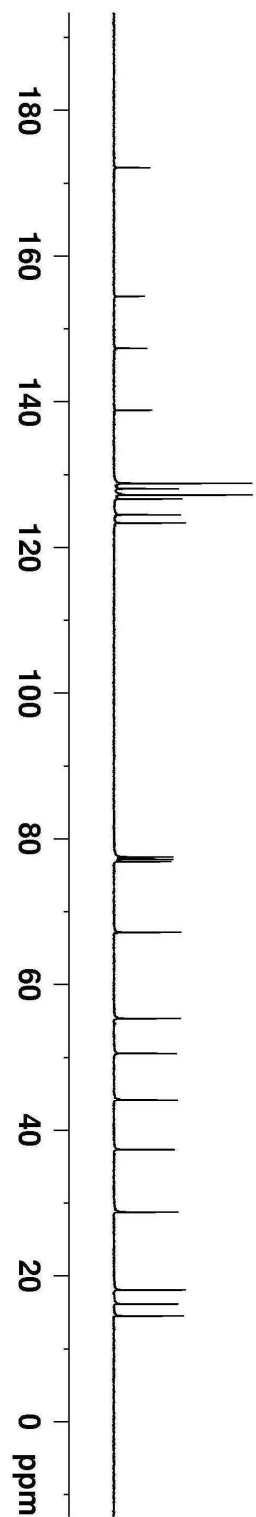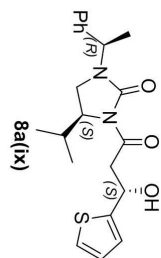

|   |        |
|---|--------|
| — | 172.05 |
| — | 154.45 |
| — | 147.32 |
| — | 138.81 |
| — | 128.79 |
| — | 128.04 |
| — | 127.18 |
| — | 126.64 |
| — | 124.46 |
| — | 123.34 |
| — | 77.48  |
| — | 77.16  |
| — | 76.85  |
| — | 67.15  |
| — | 55.31  |
| — | 50.52  |
| — | 44.11  |
| — | 37.31  |
| — | 28.73  |
| — | 18.03  |
| — | 16.10  |
| — | 14.47  |

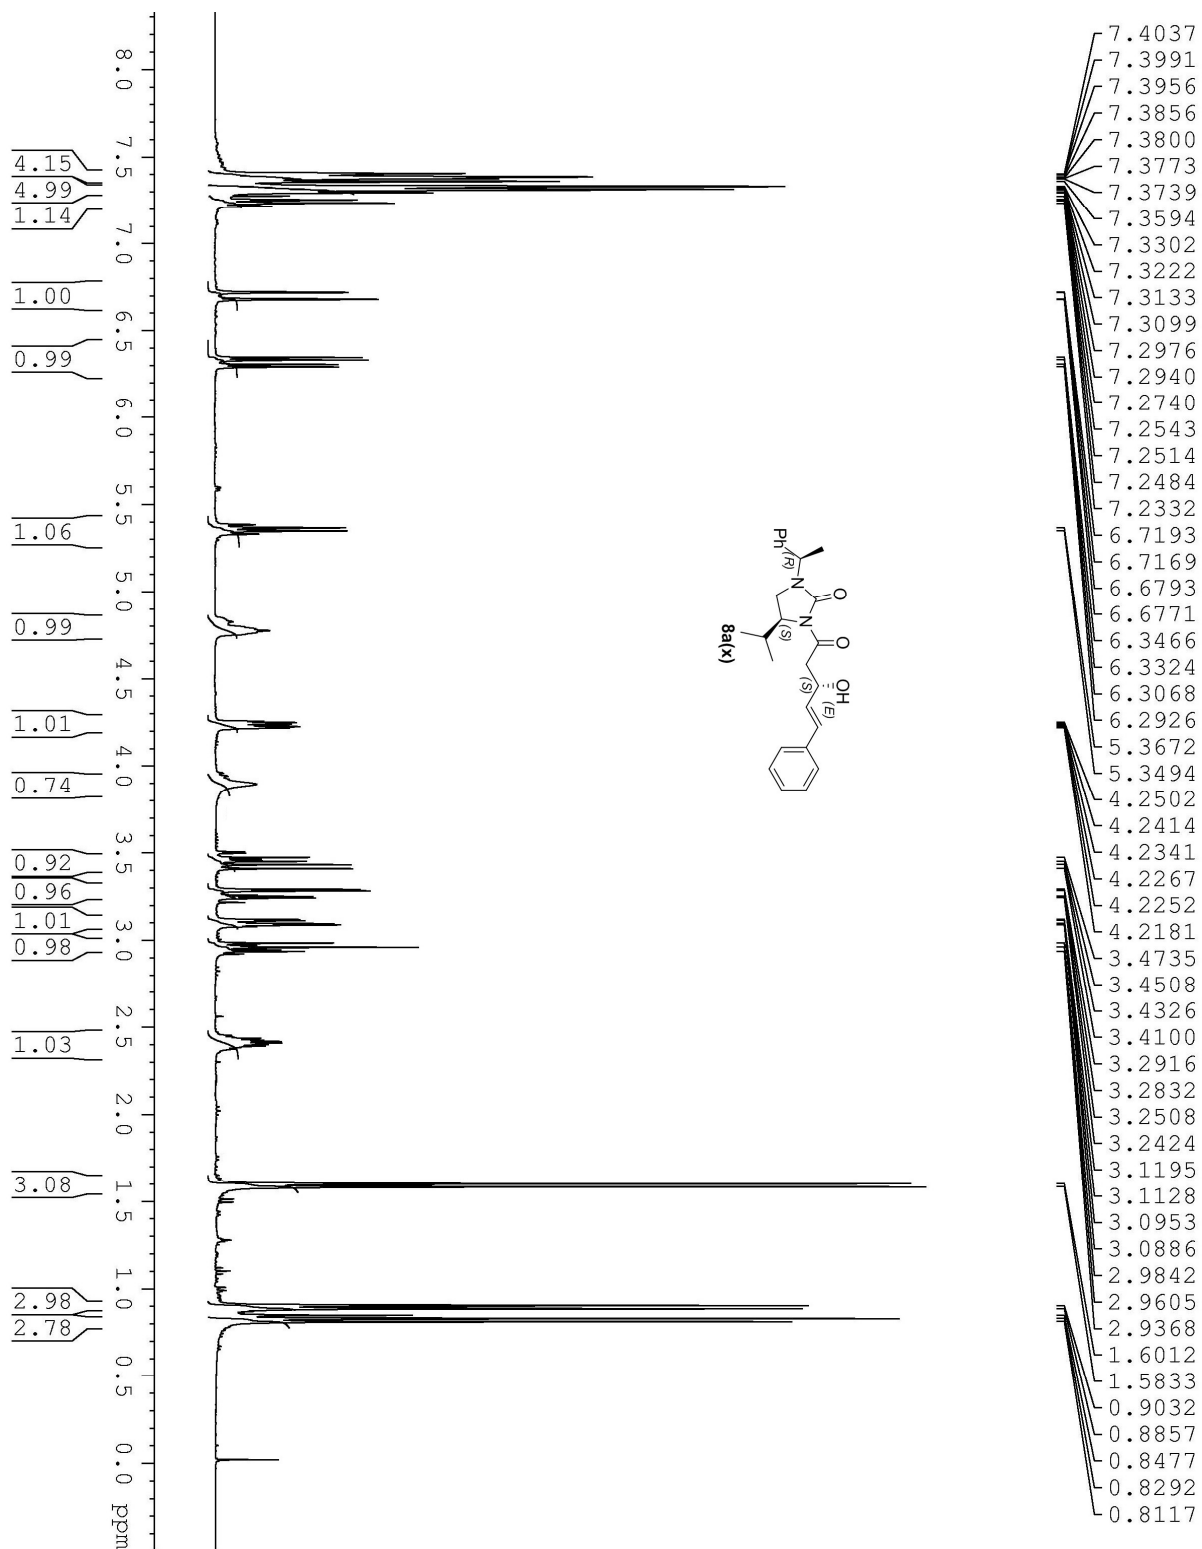

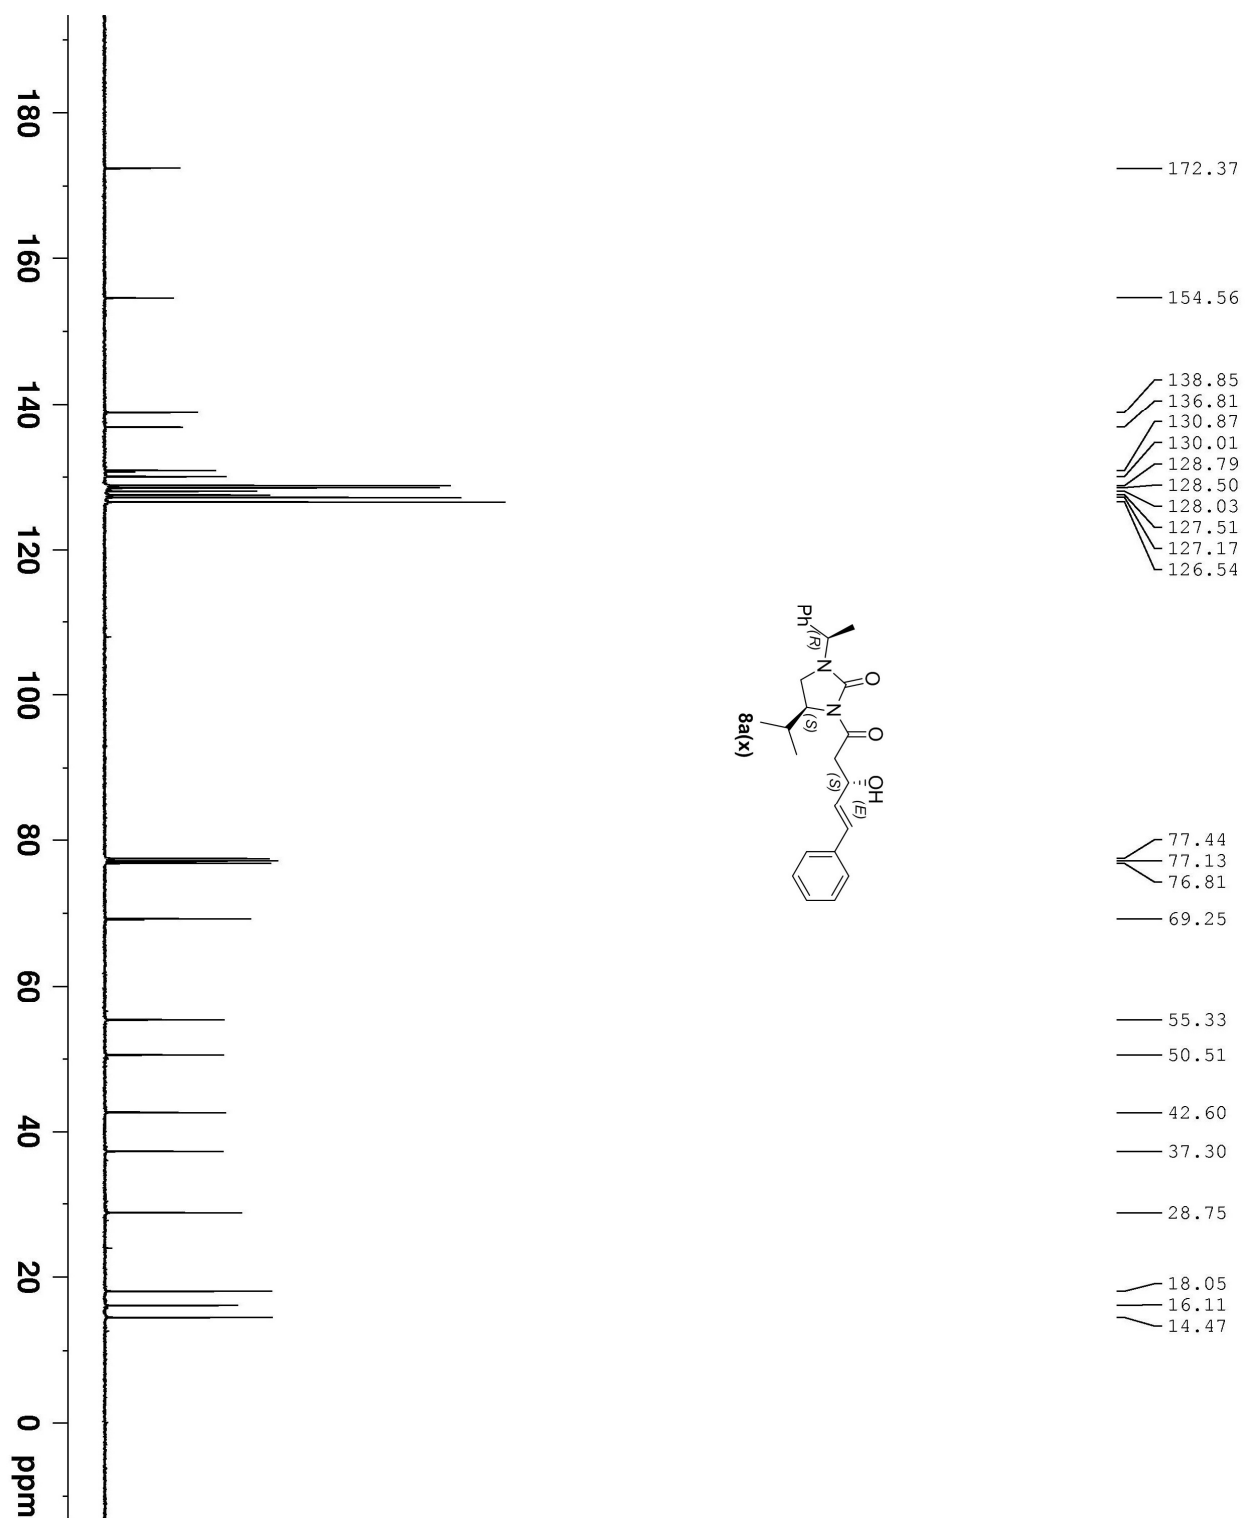

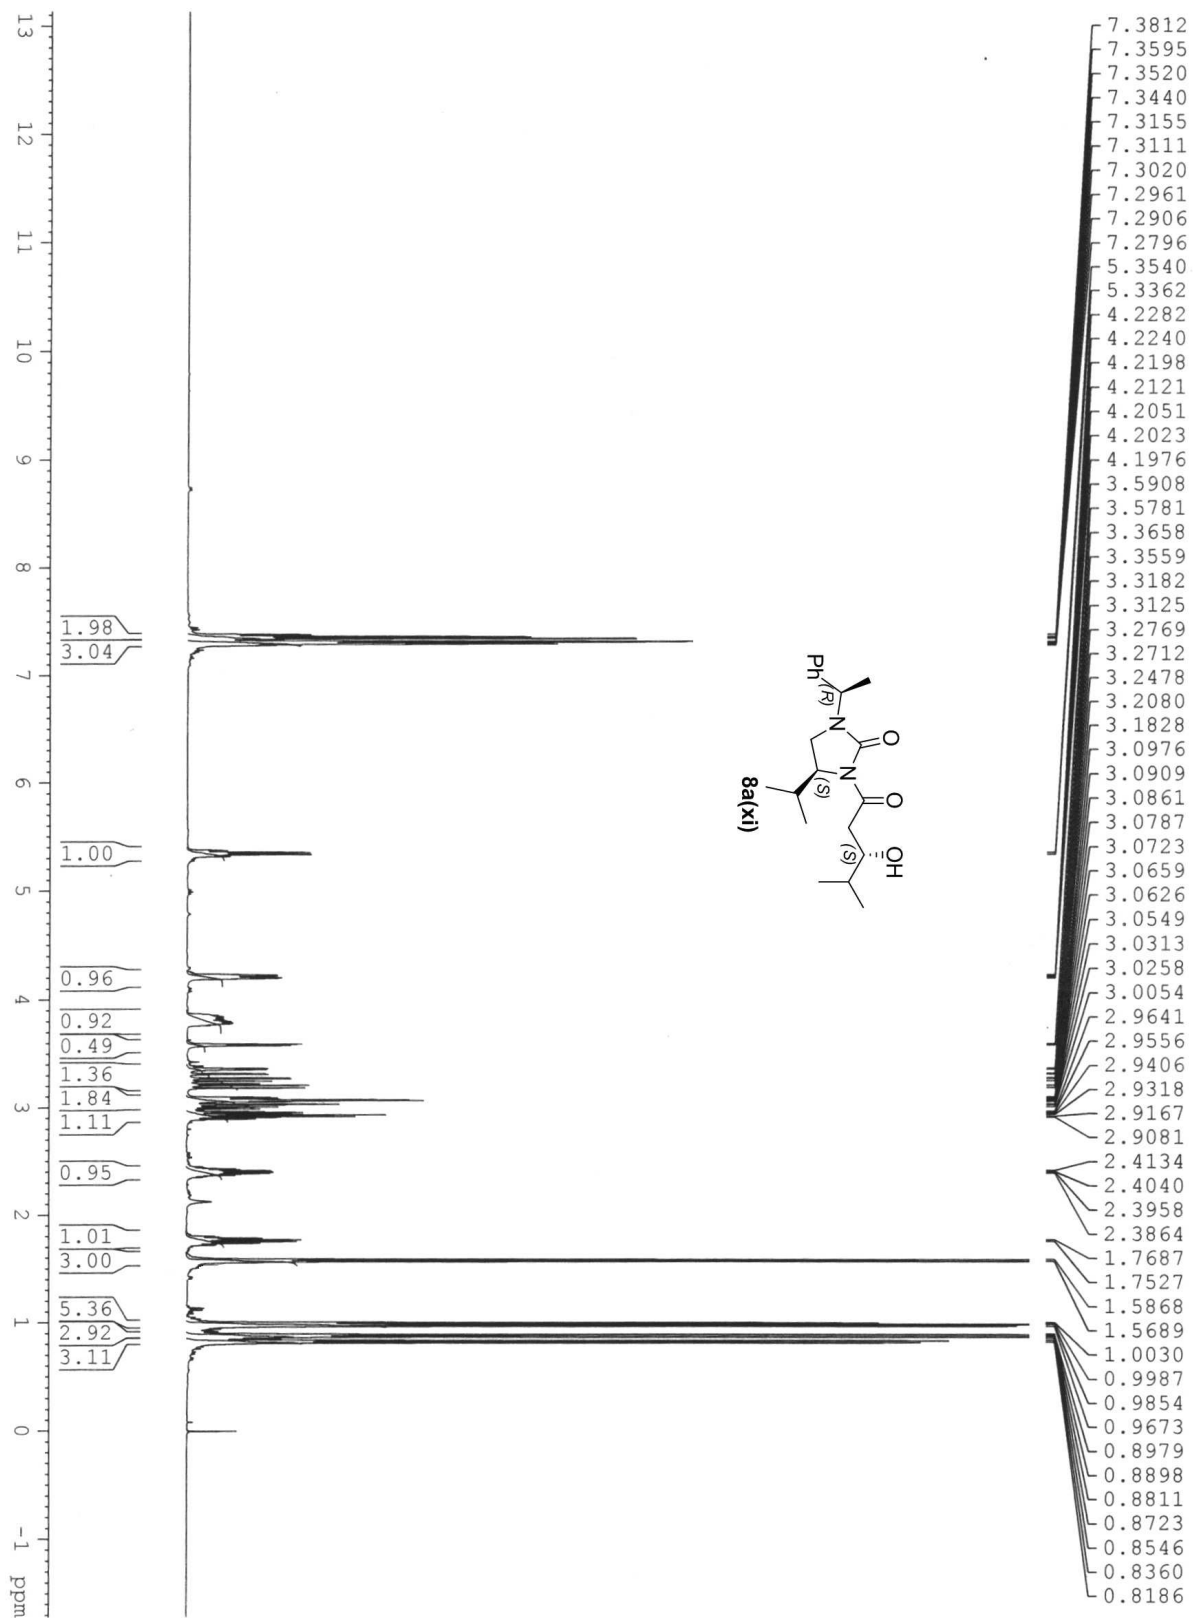



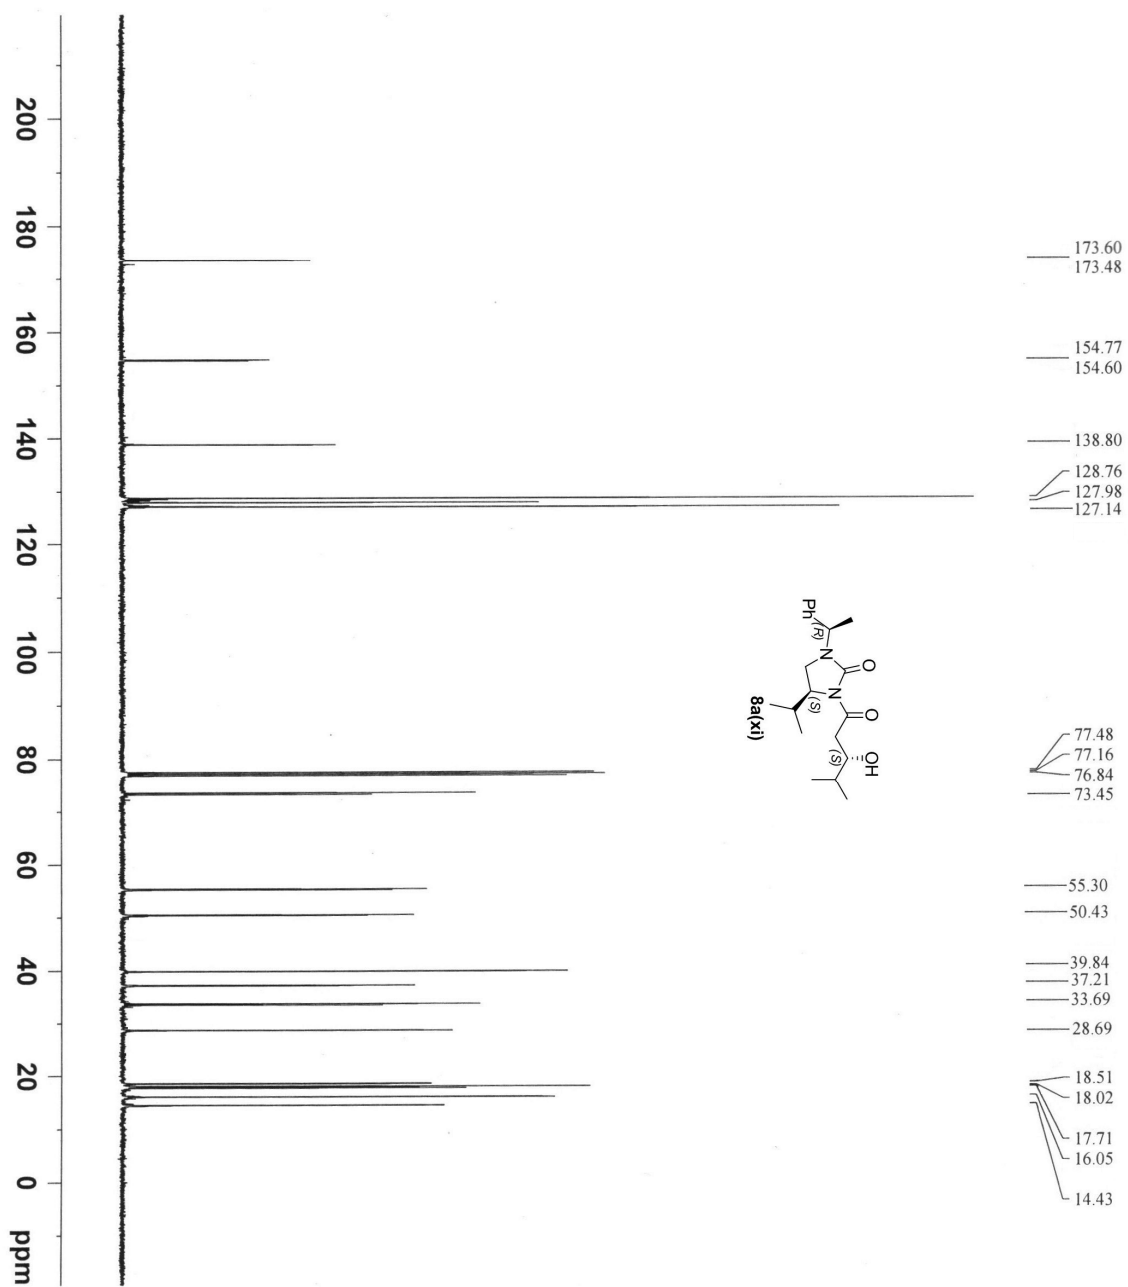

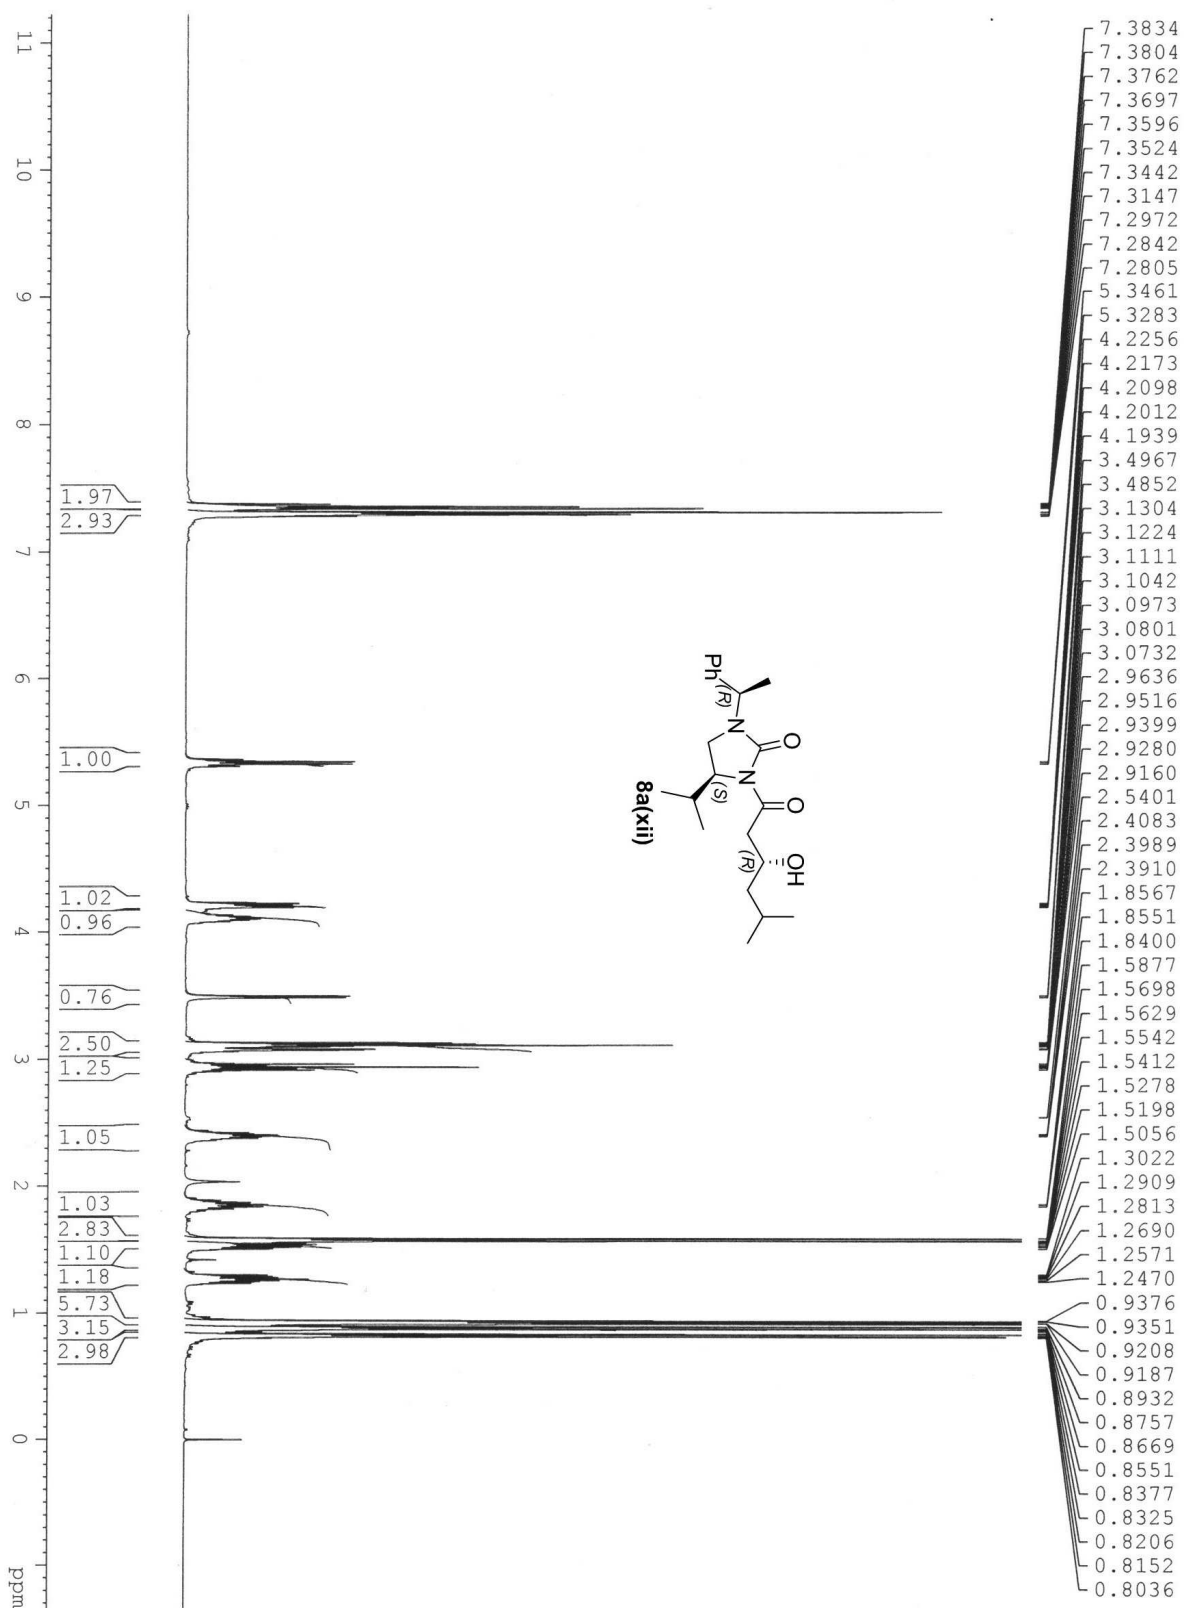

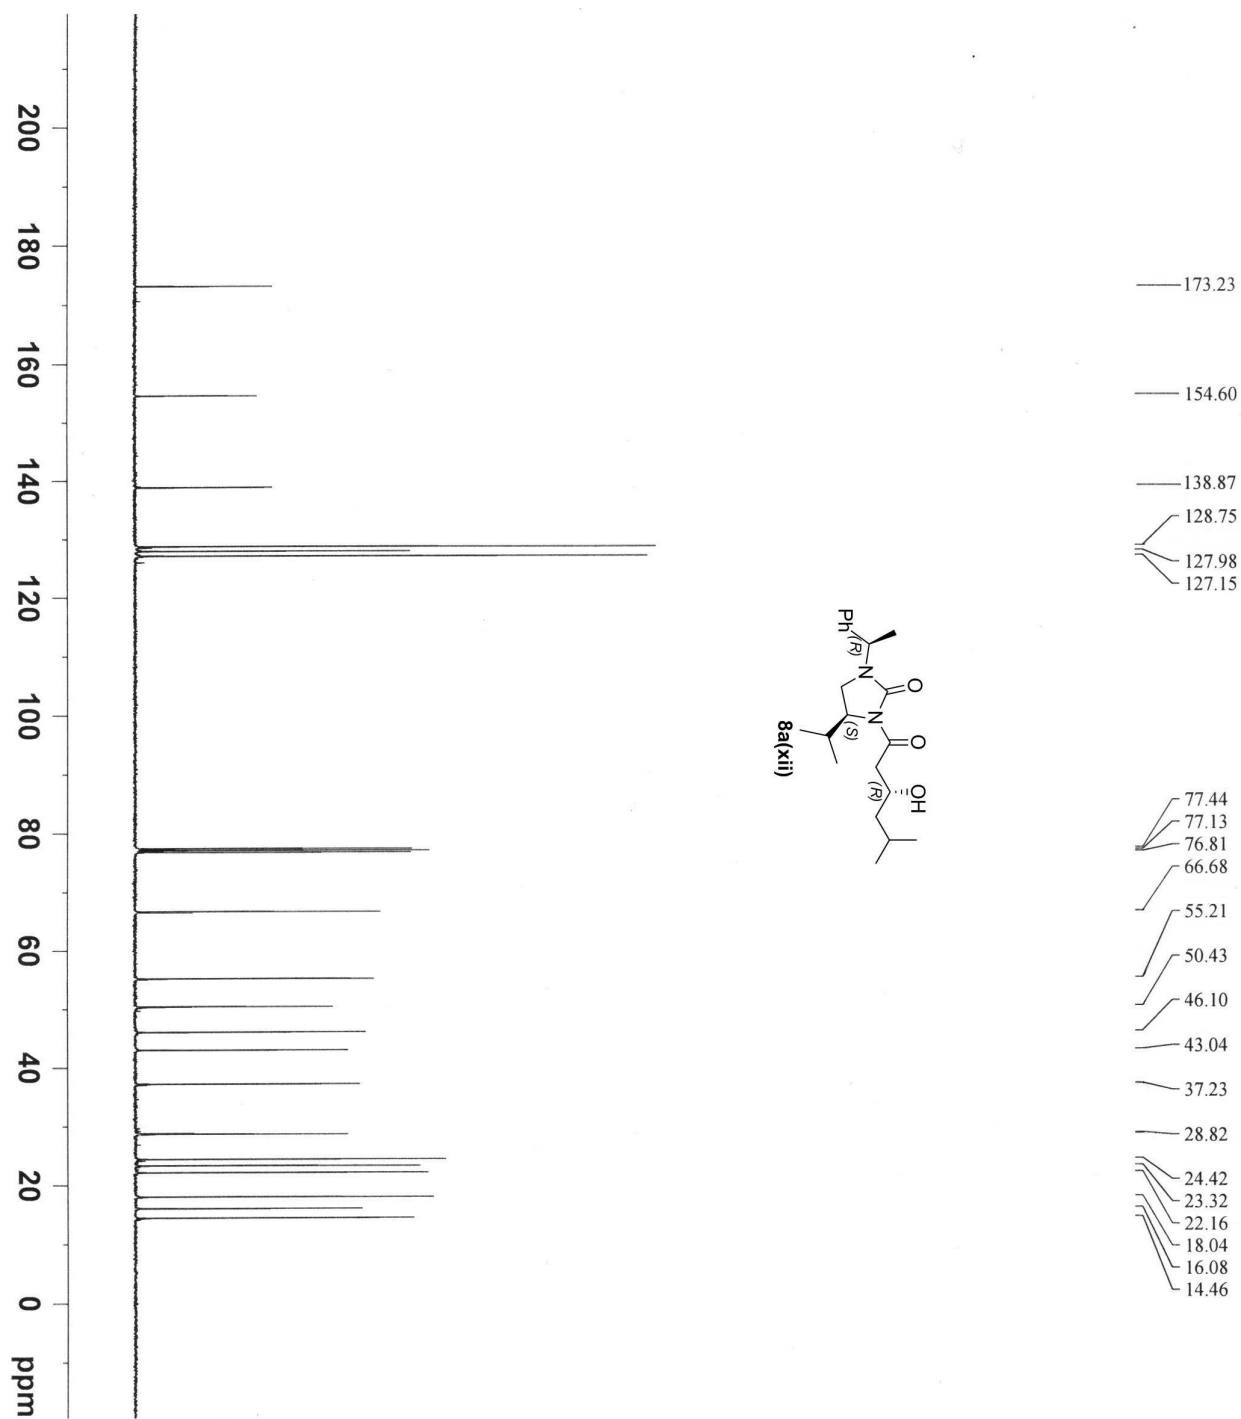

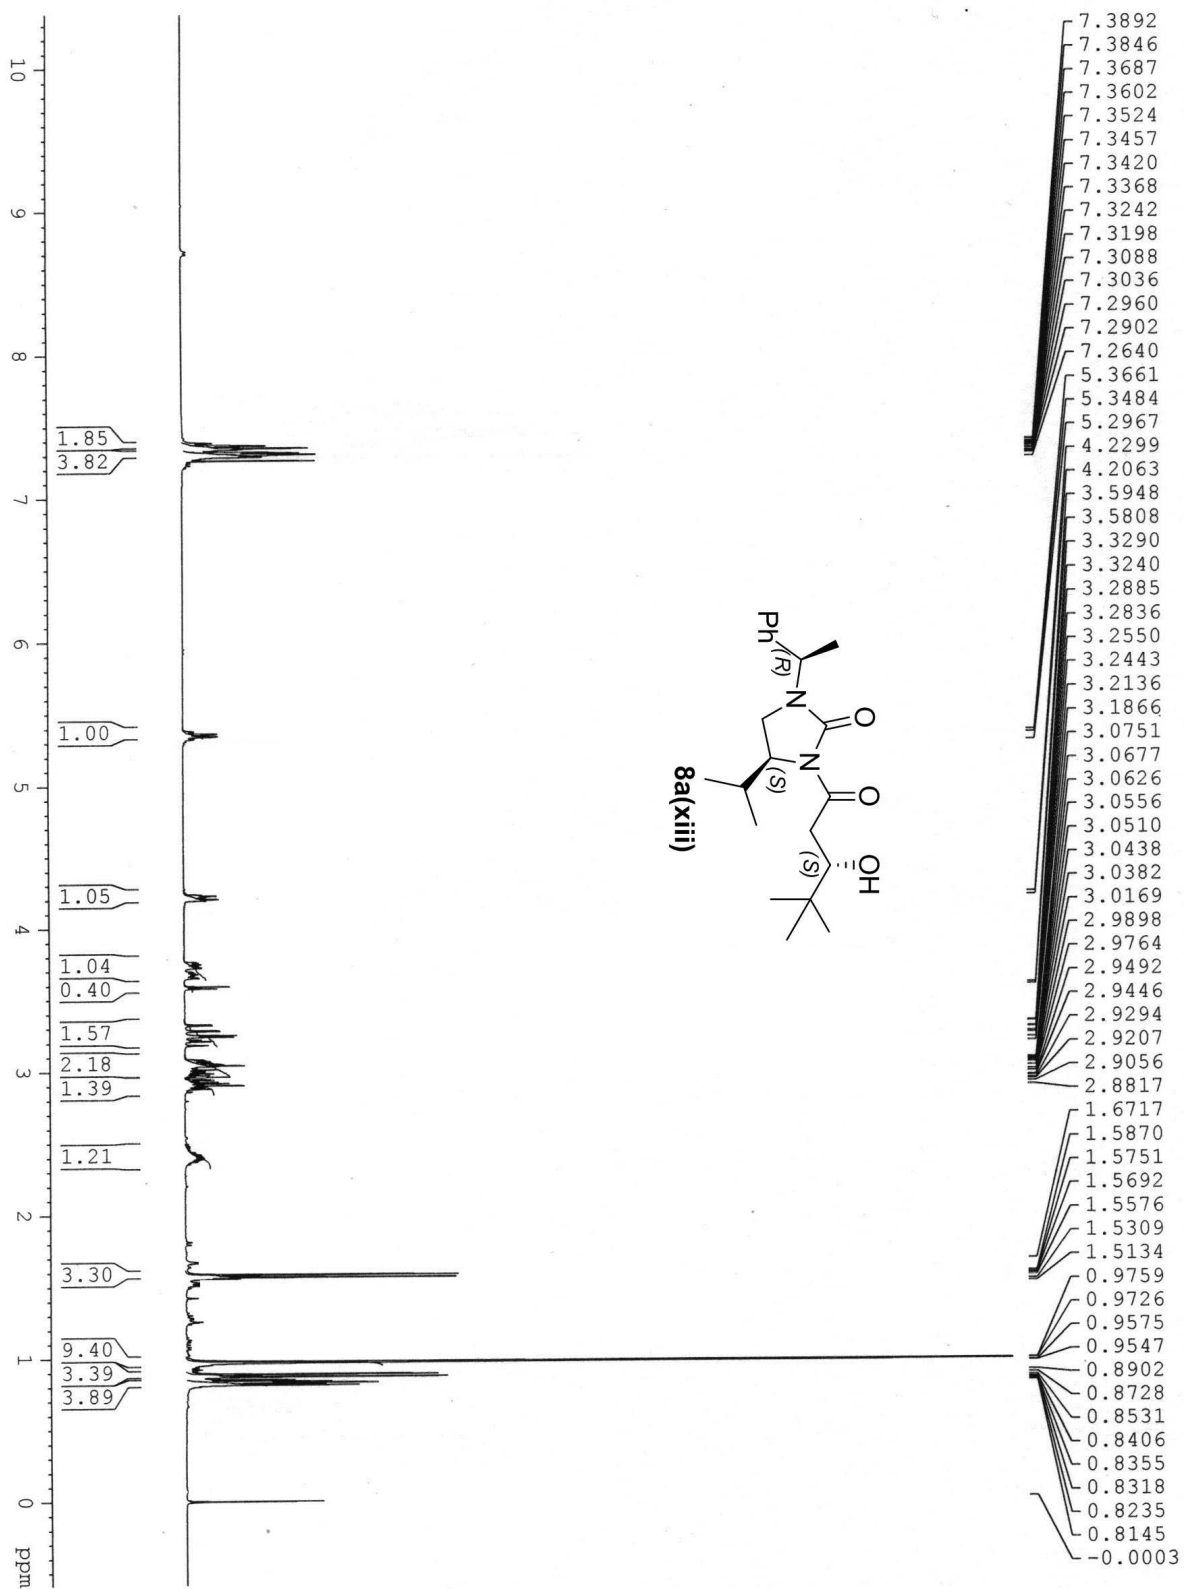

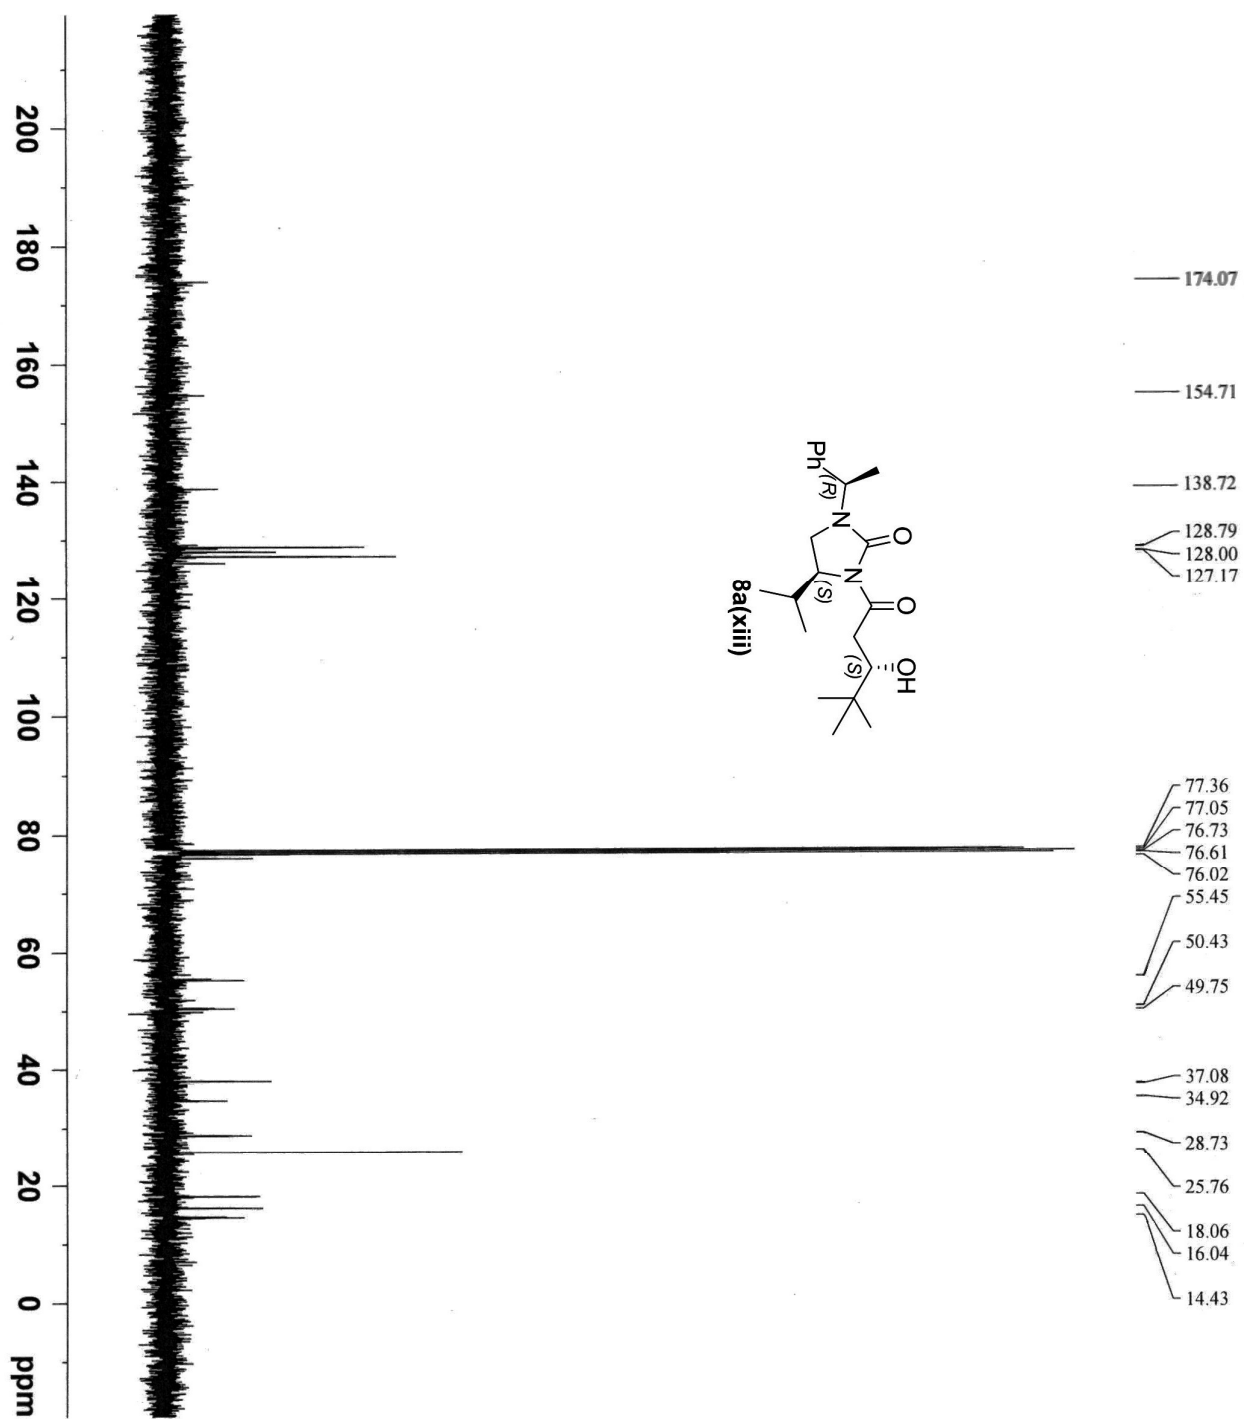

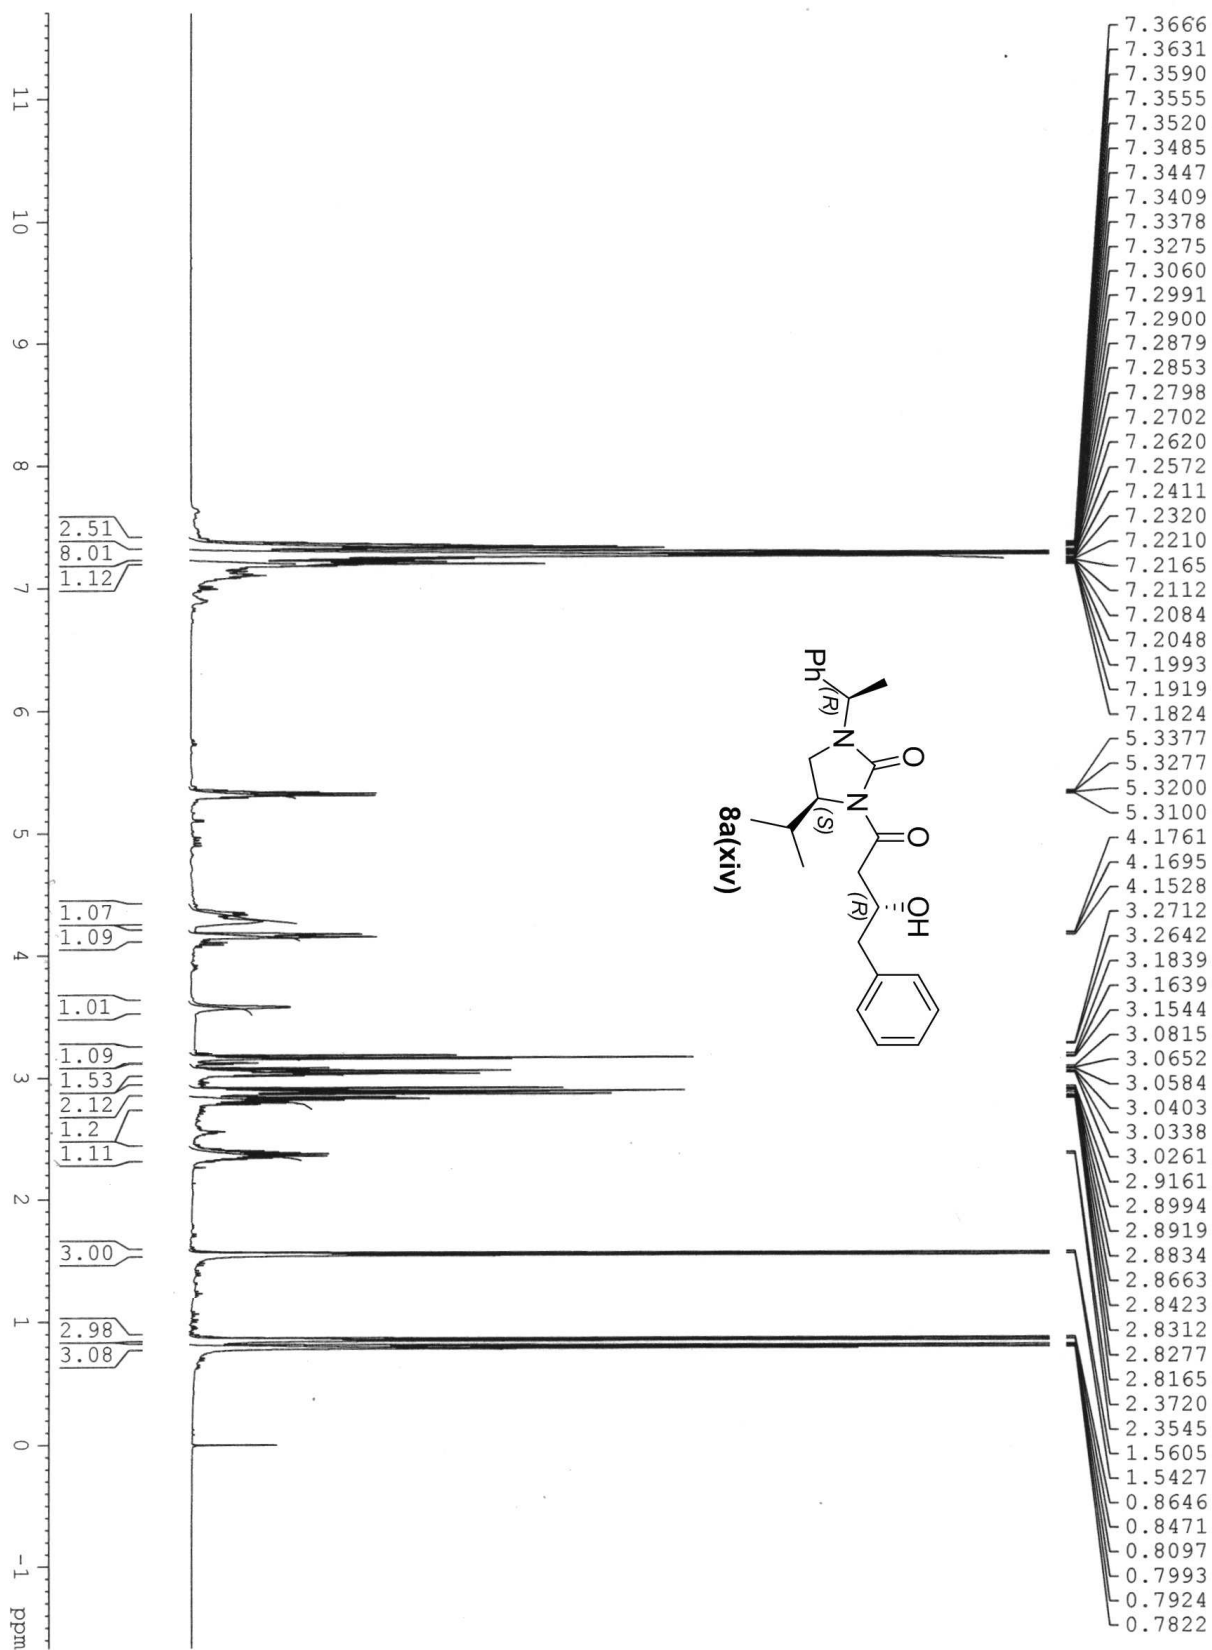

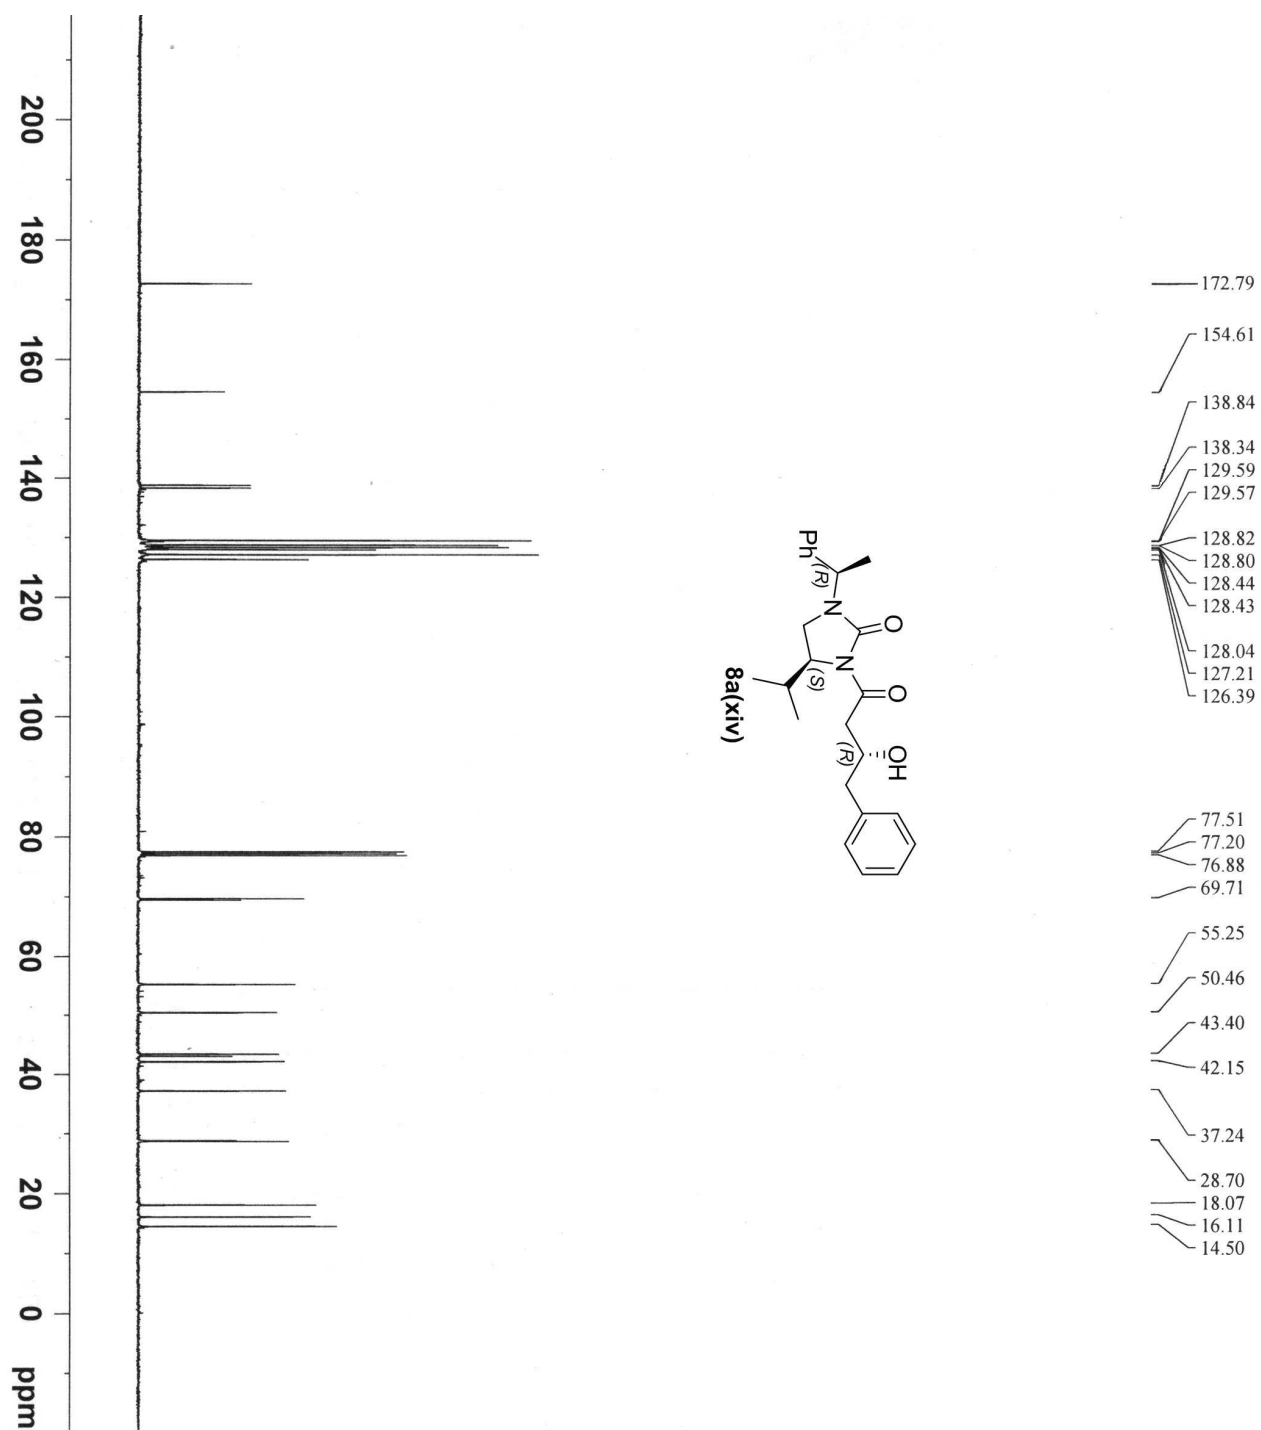

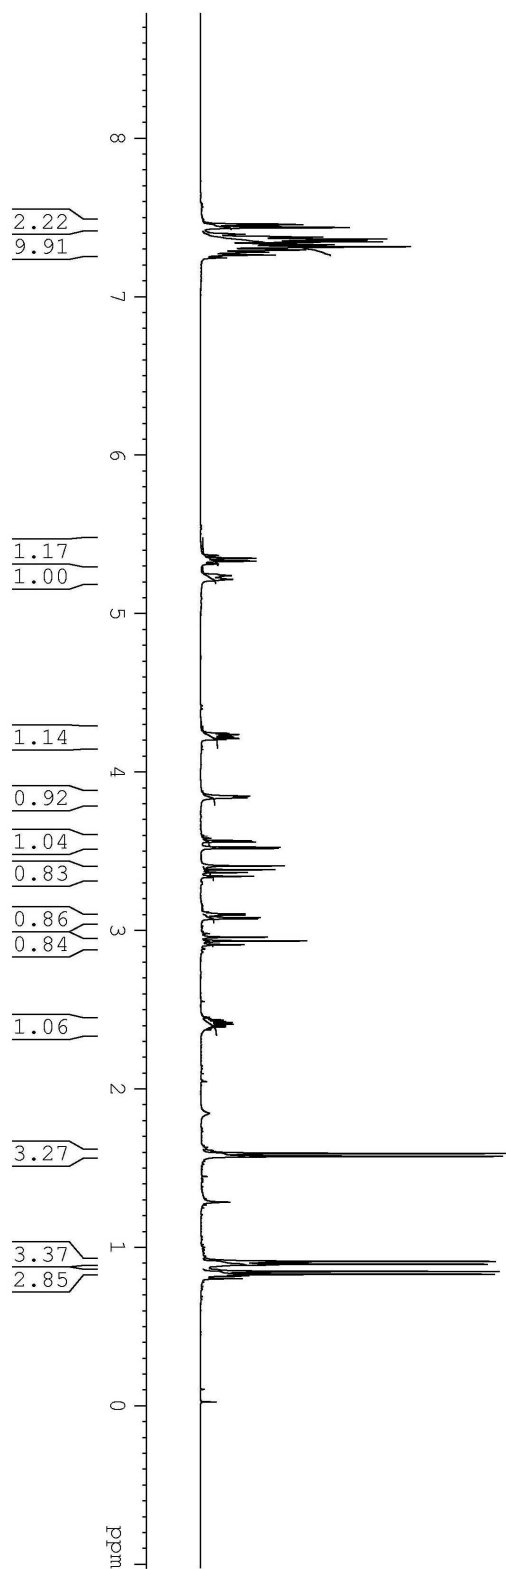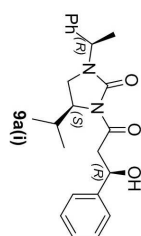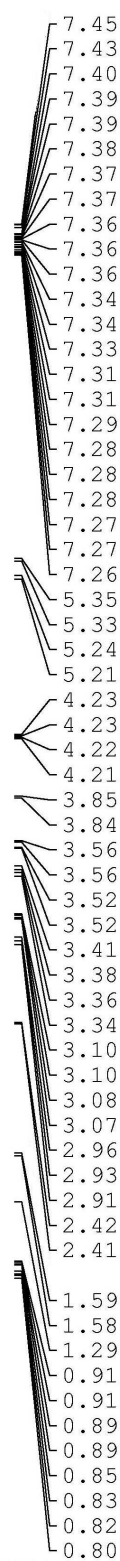



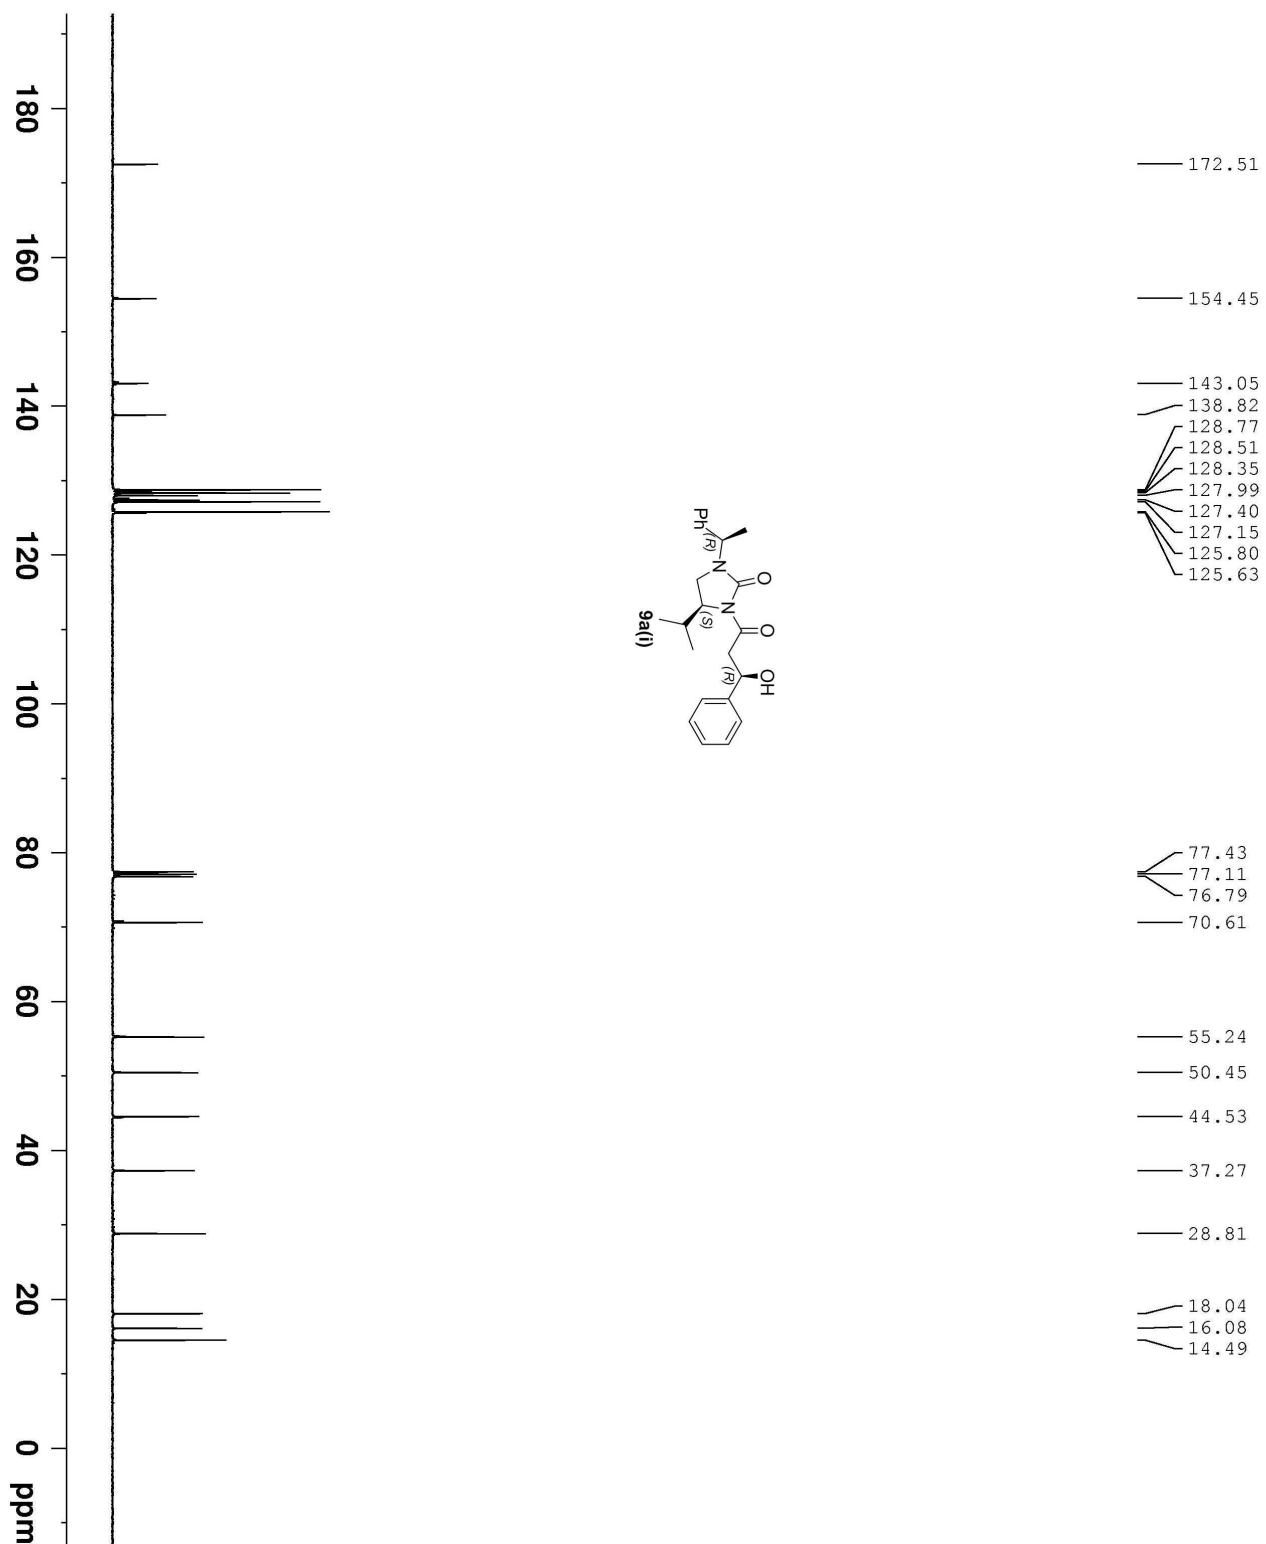

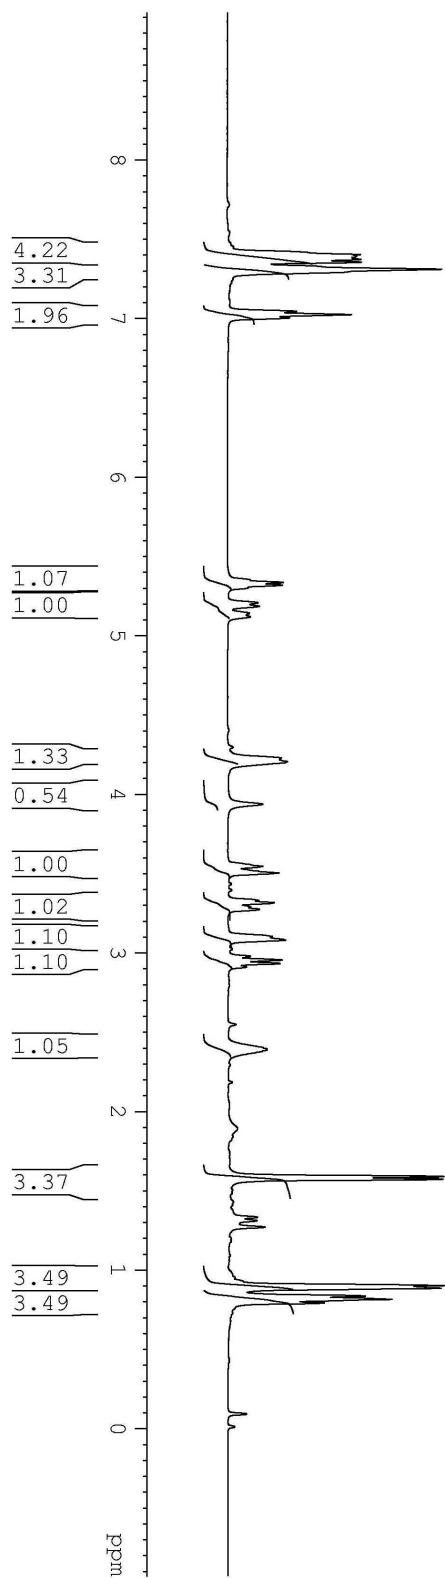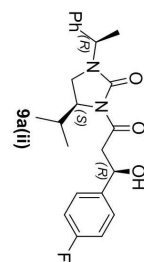

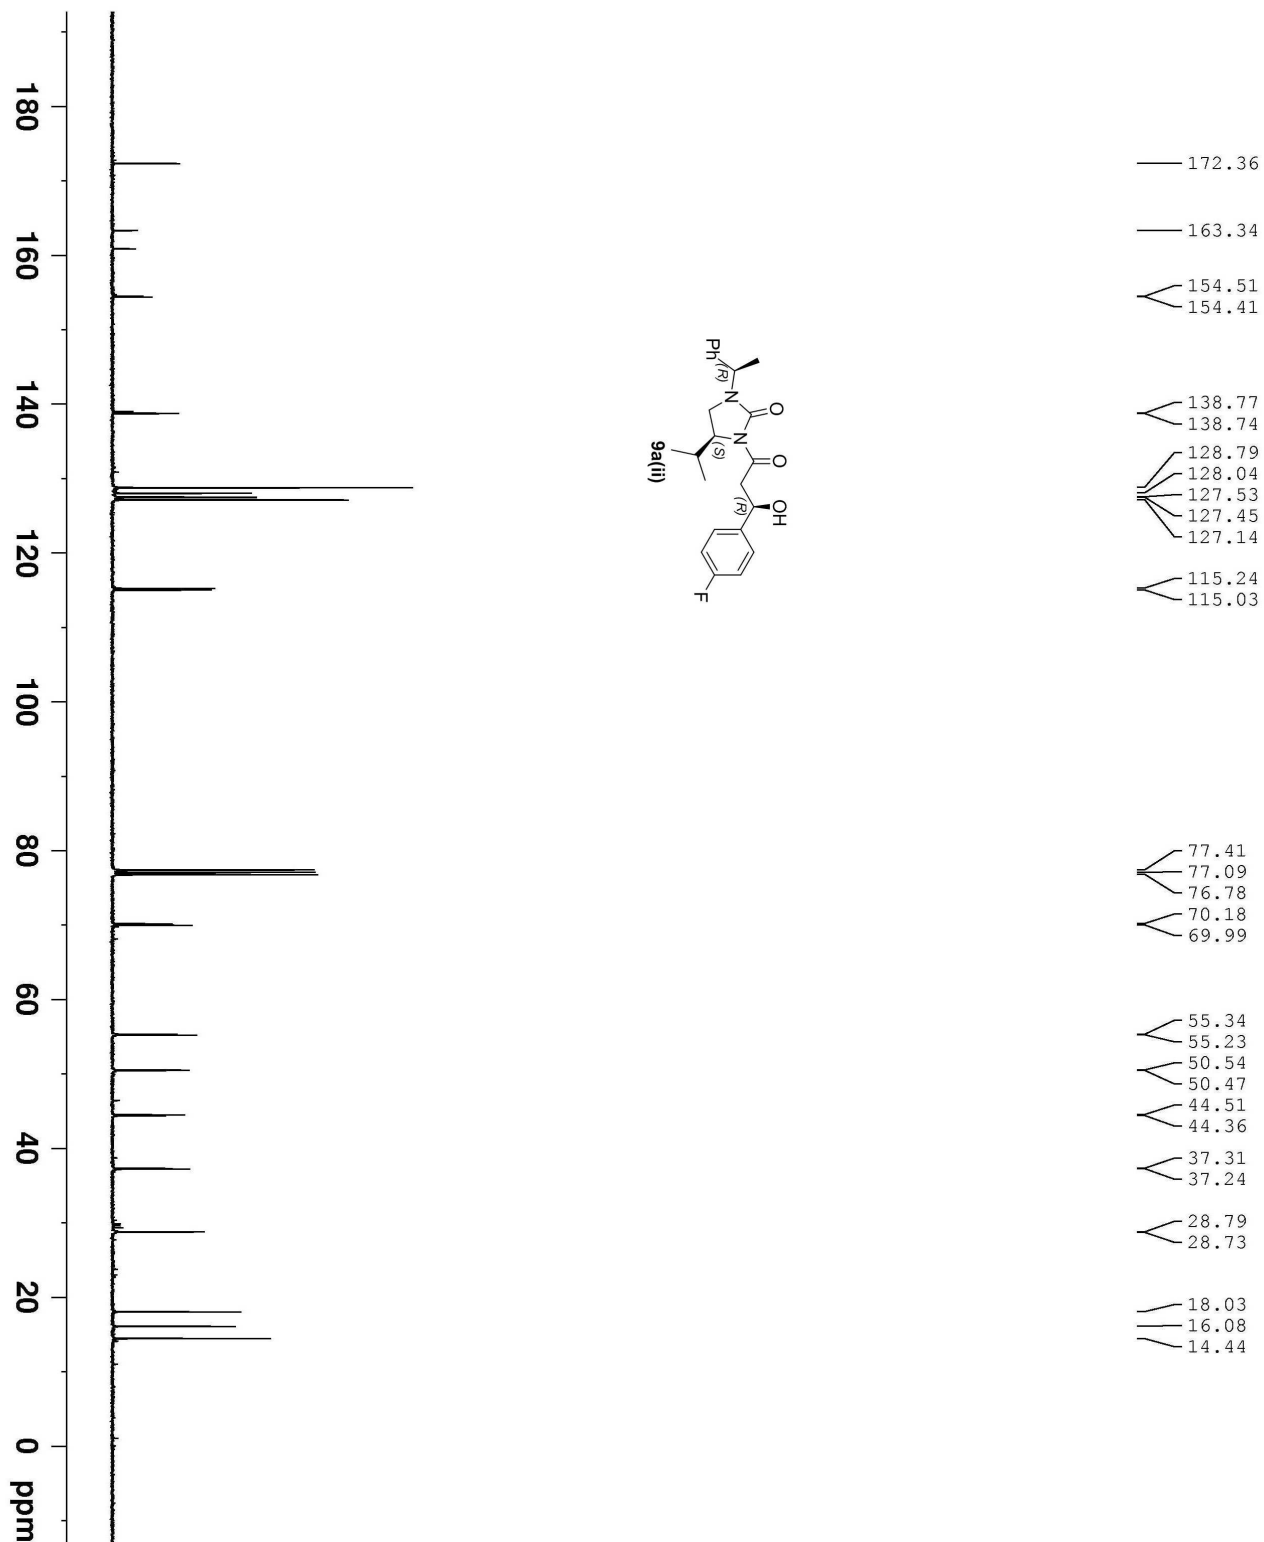

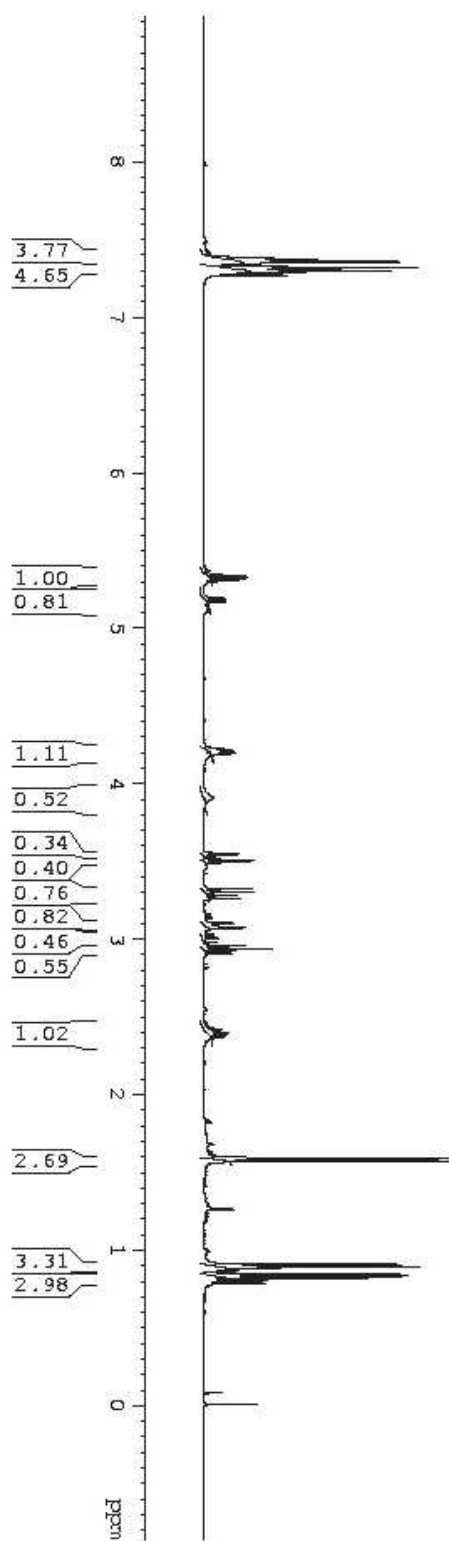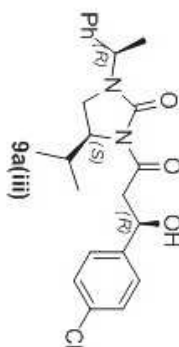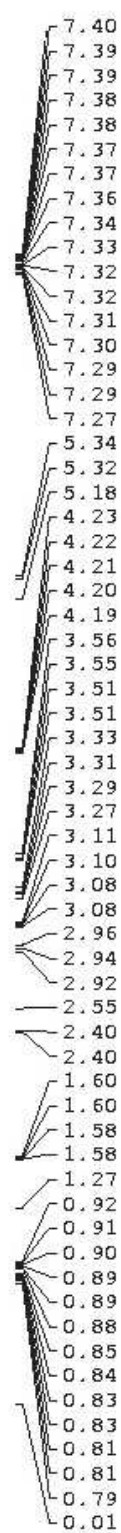

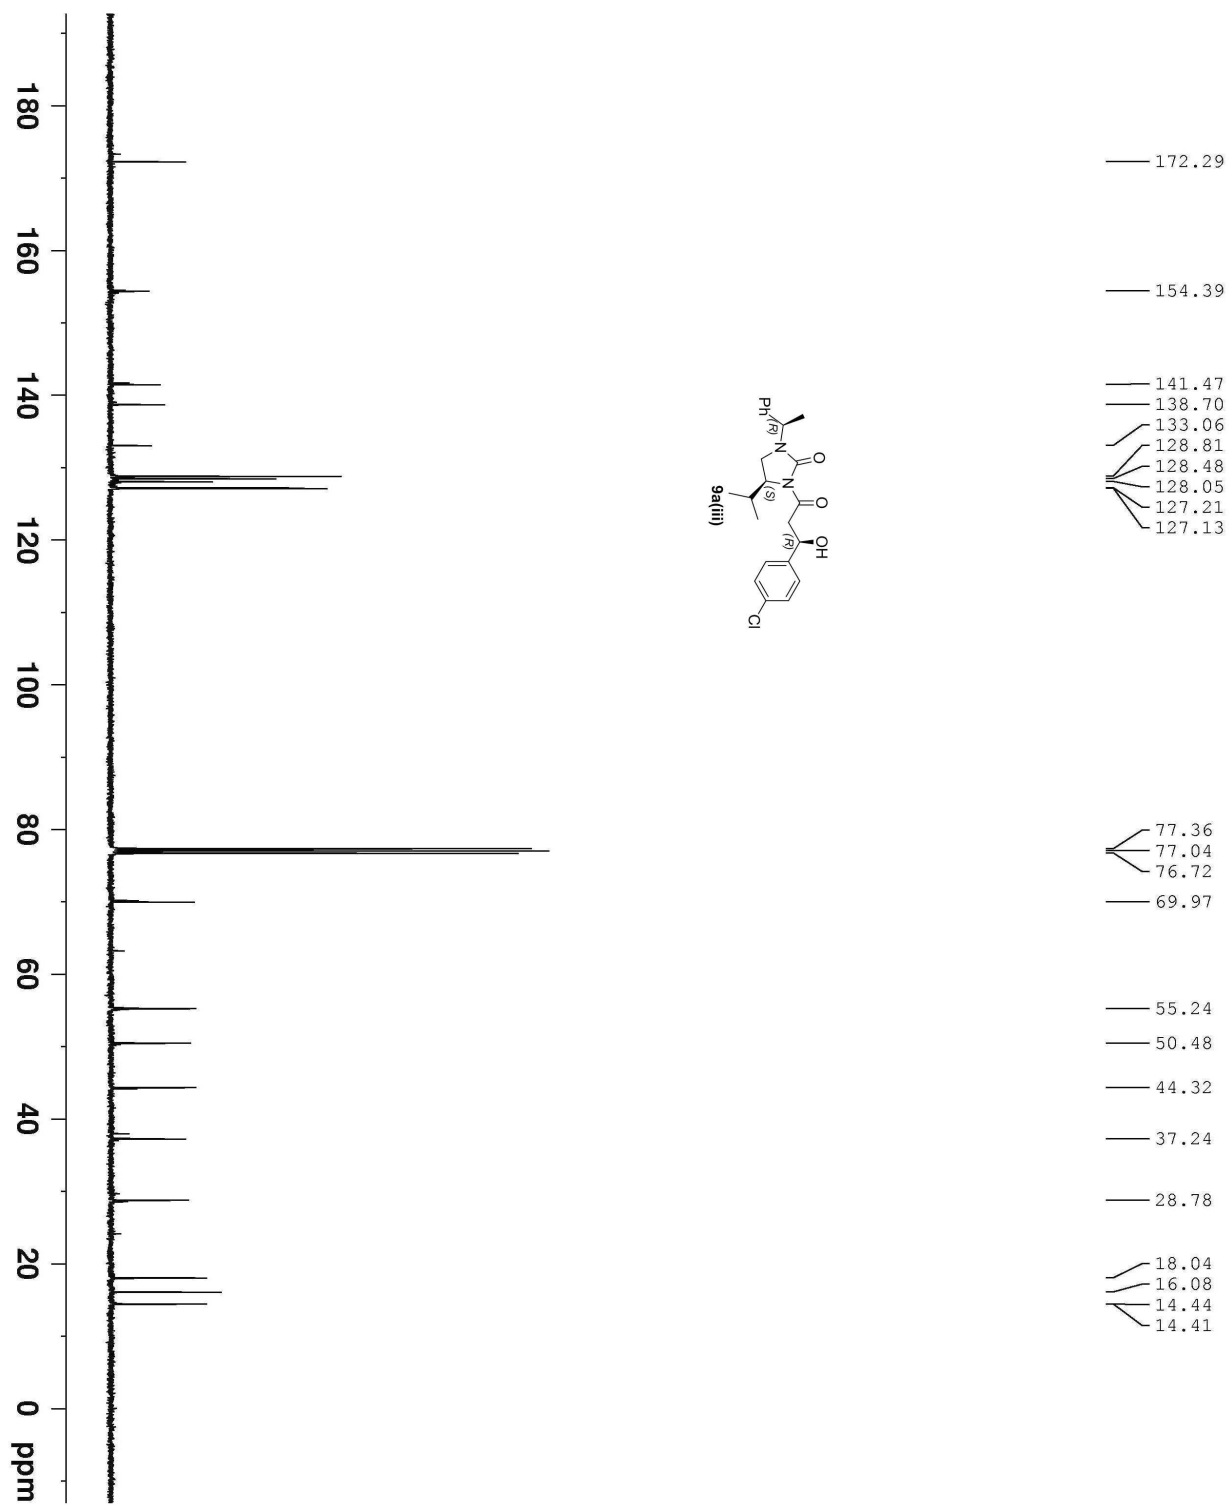

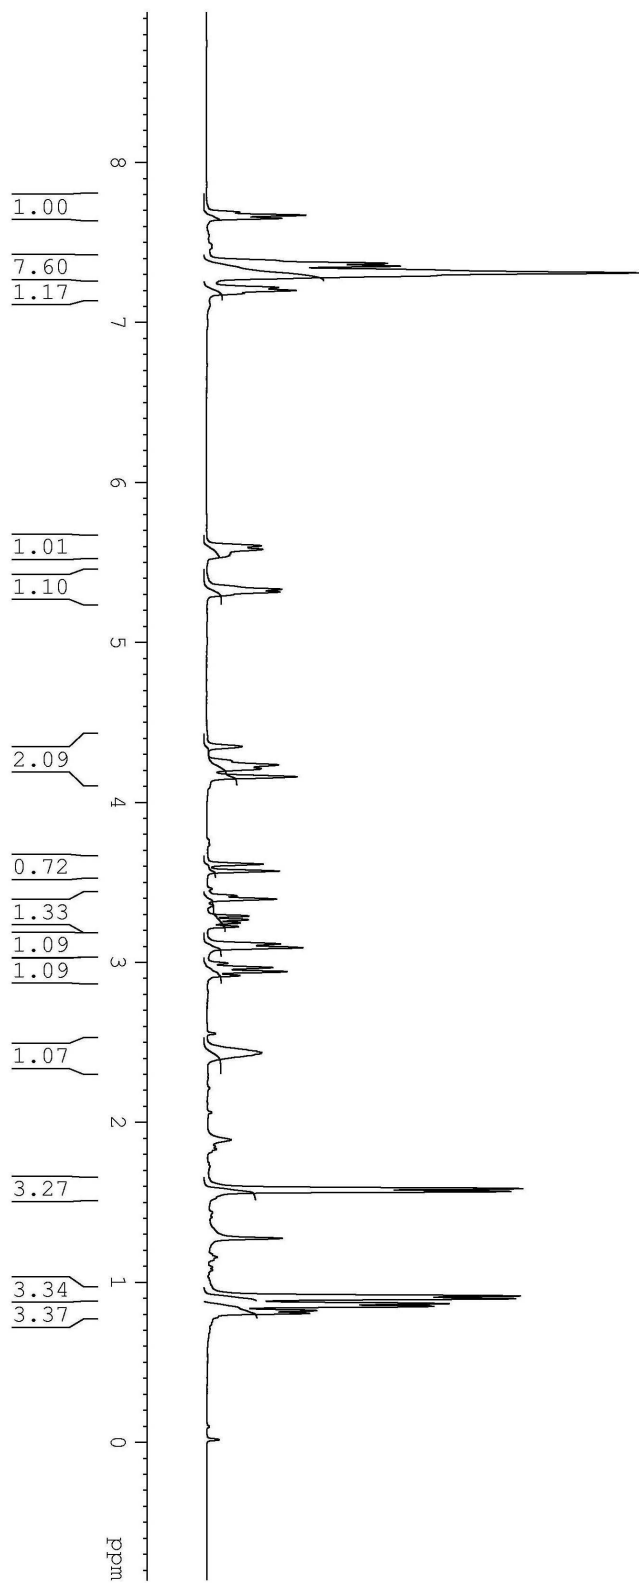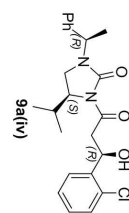

7.69  
7.67  
7.65  
7.37  
7.35  
7.31  
7.22  
7.20  
7.18

5.60  
5.58  
5.33  
5.31  
4.35  
4.23  
4.21  
4.16  
3.61  
3.57  
3.41  
3.39  
3.35  
3.29  
3.26  
3.24  
3.22  
3.11  
3.09  
2.99  
2.97  
2.94  
2.92  
2.55  
2.44  
2.43  
1.89  
1.85  
1.83  
1.59  
1.57  
1.44  
1.28  
1.16  
1.08  
0.92  
0.90  
0.87  
0.85  
0.82  
0.81  
0.02

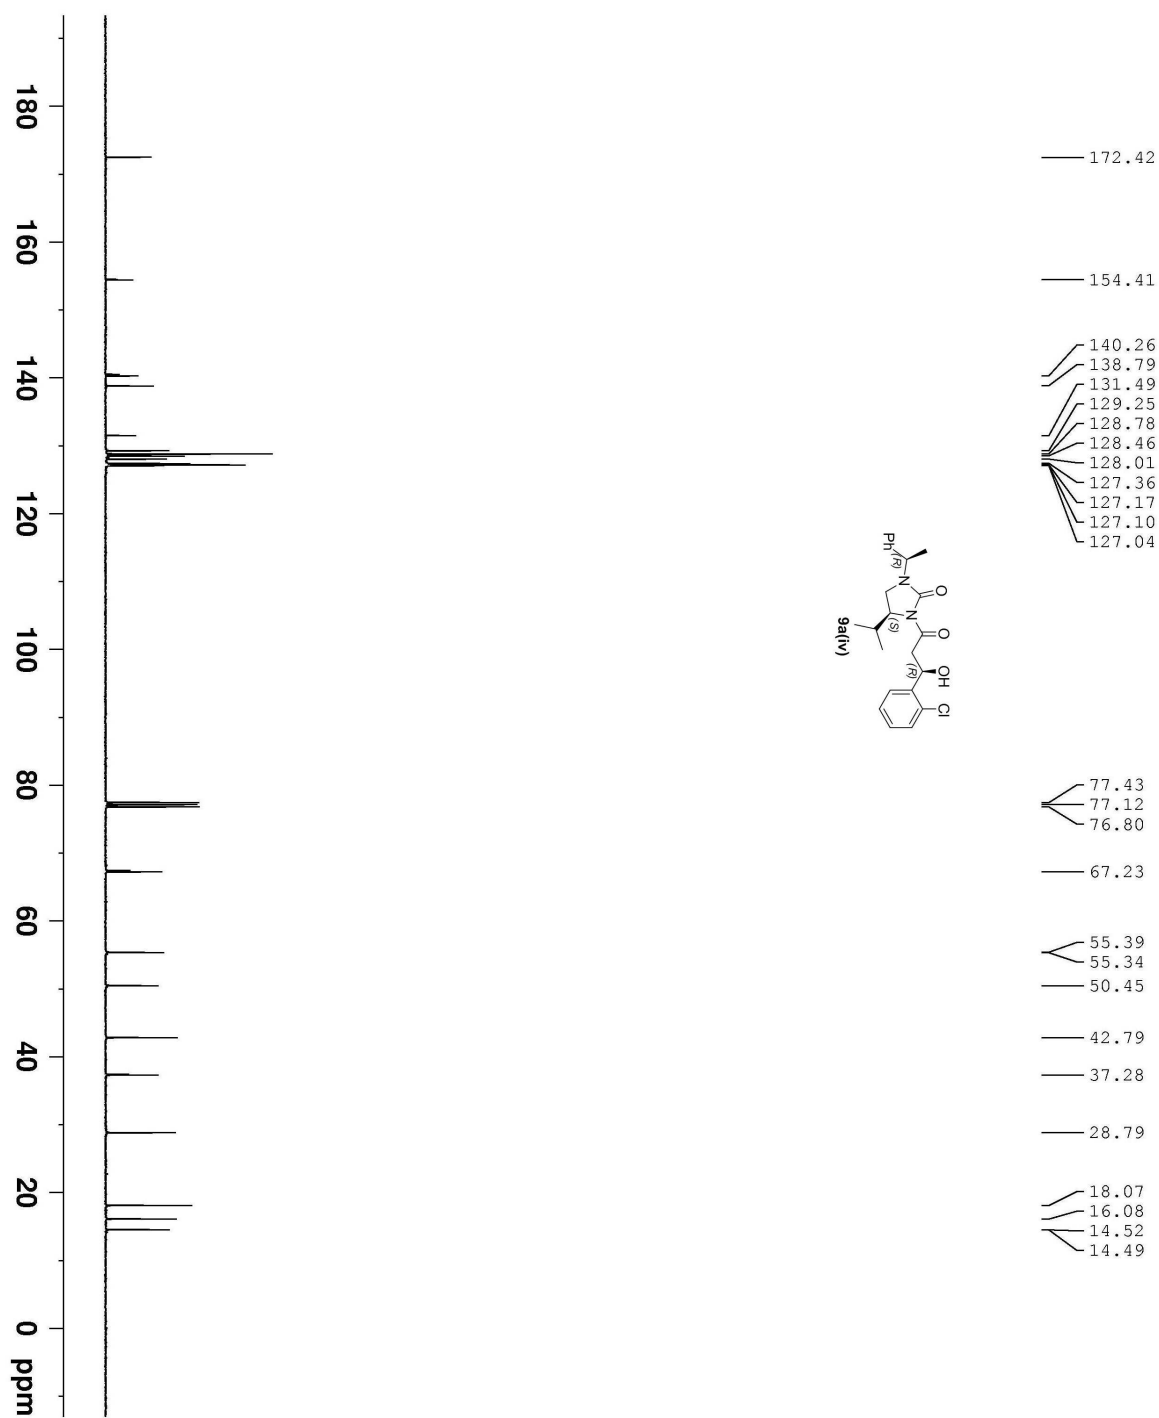

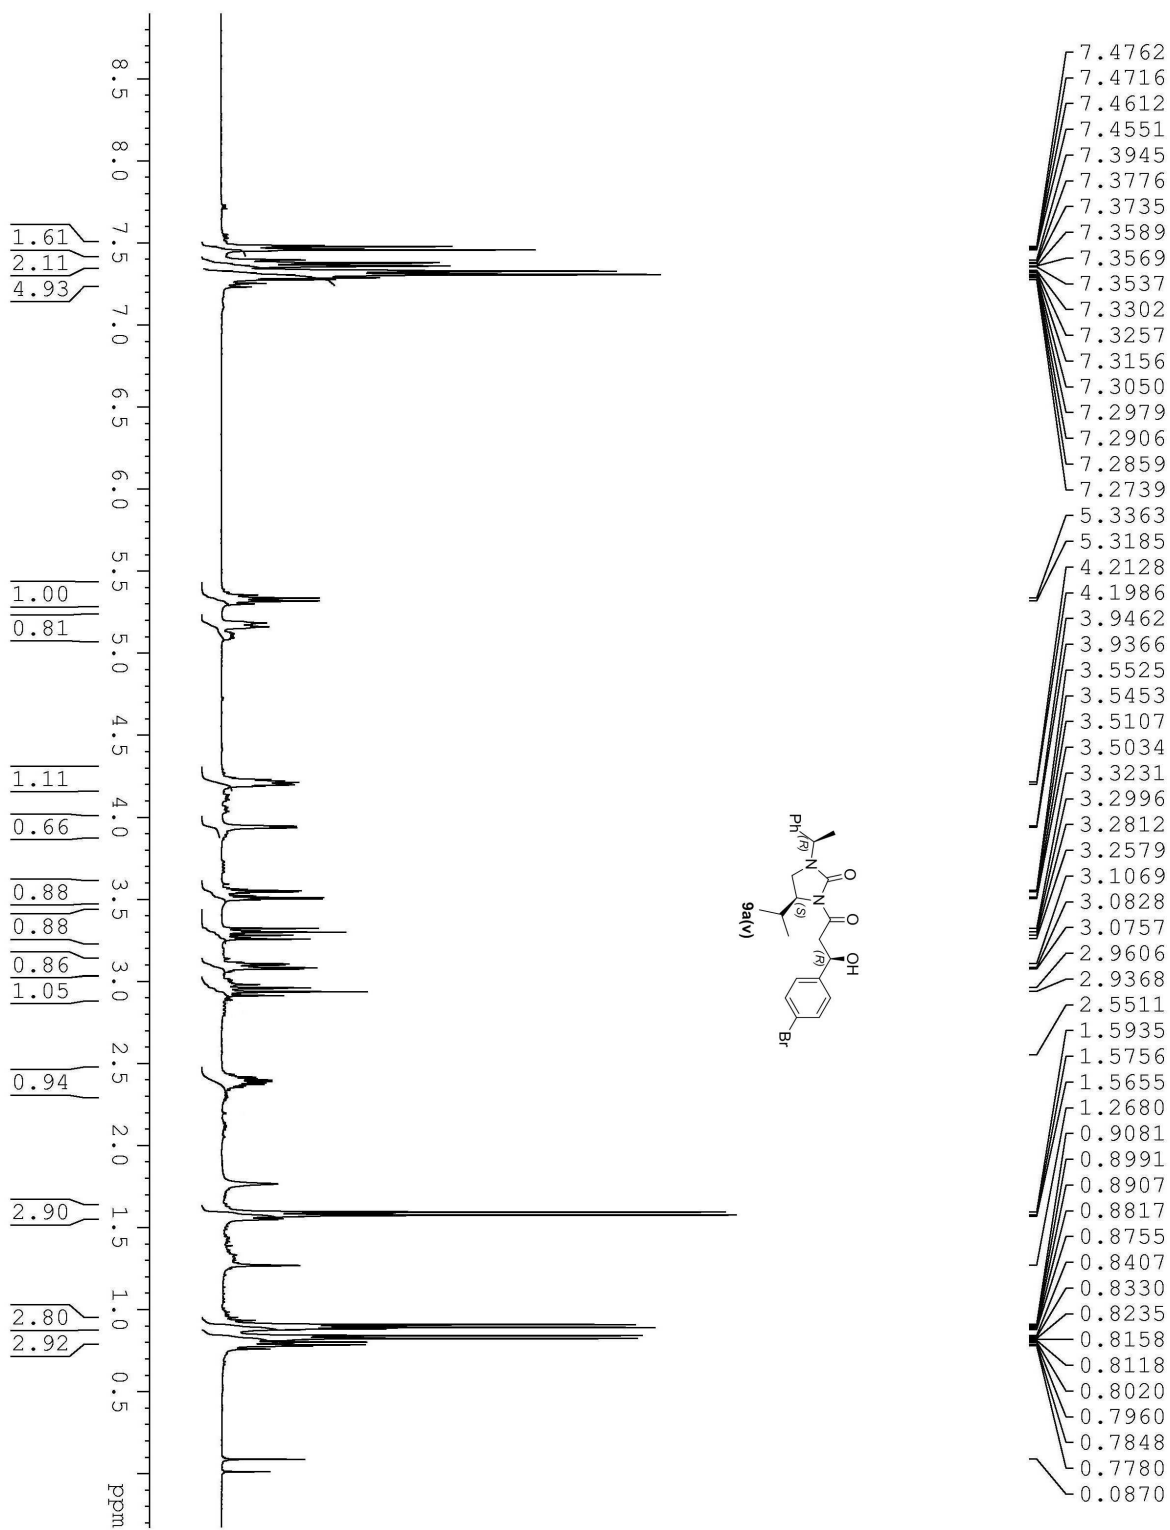



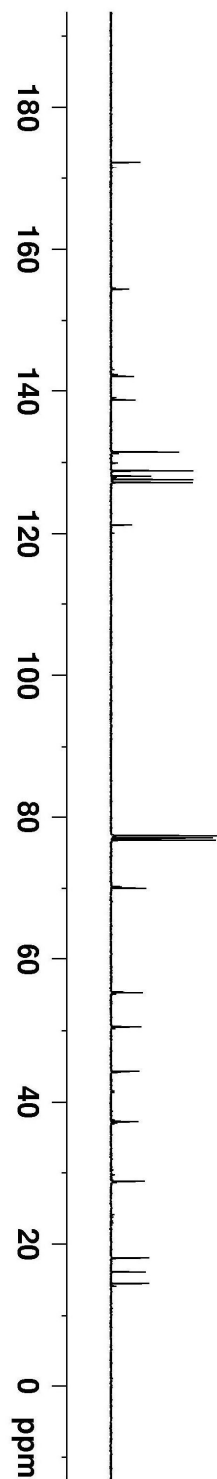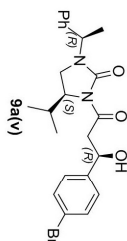

— 172.23

— 154.39

— 142.04

— 138.71

— 131.44

— 131.42

— 128.81

— 128.72

— 128.05

— 127.57

— 127.13

— 121.19

— 77.37

— 77.06

— 76.74

— 70.01

— 55.24

— 50.49

— 44.28

— 37.25

— 28.78

— 18.04

— 16.08

— 14.45

— 14.42

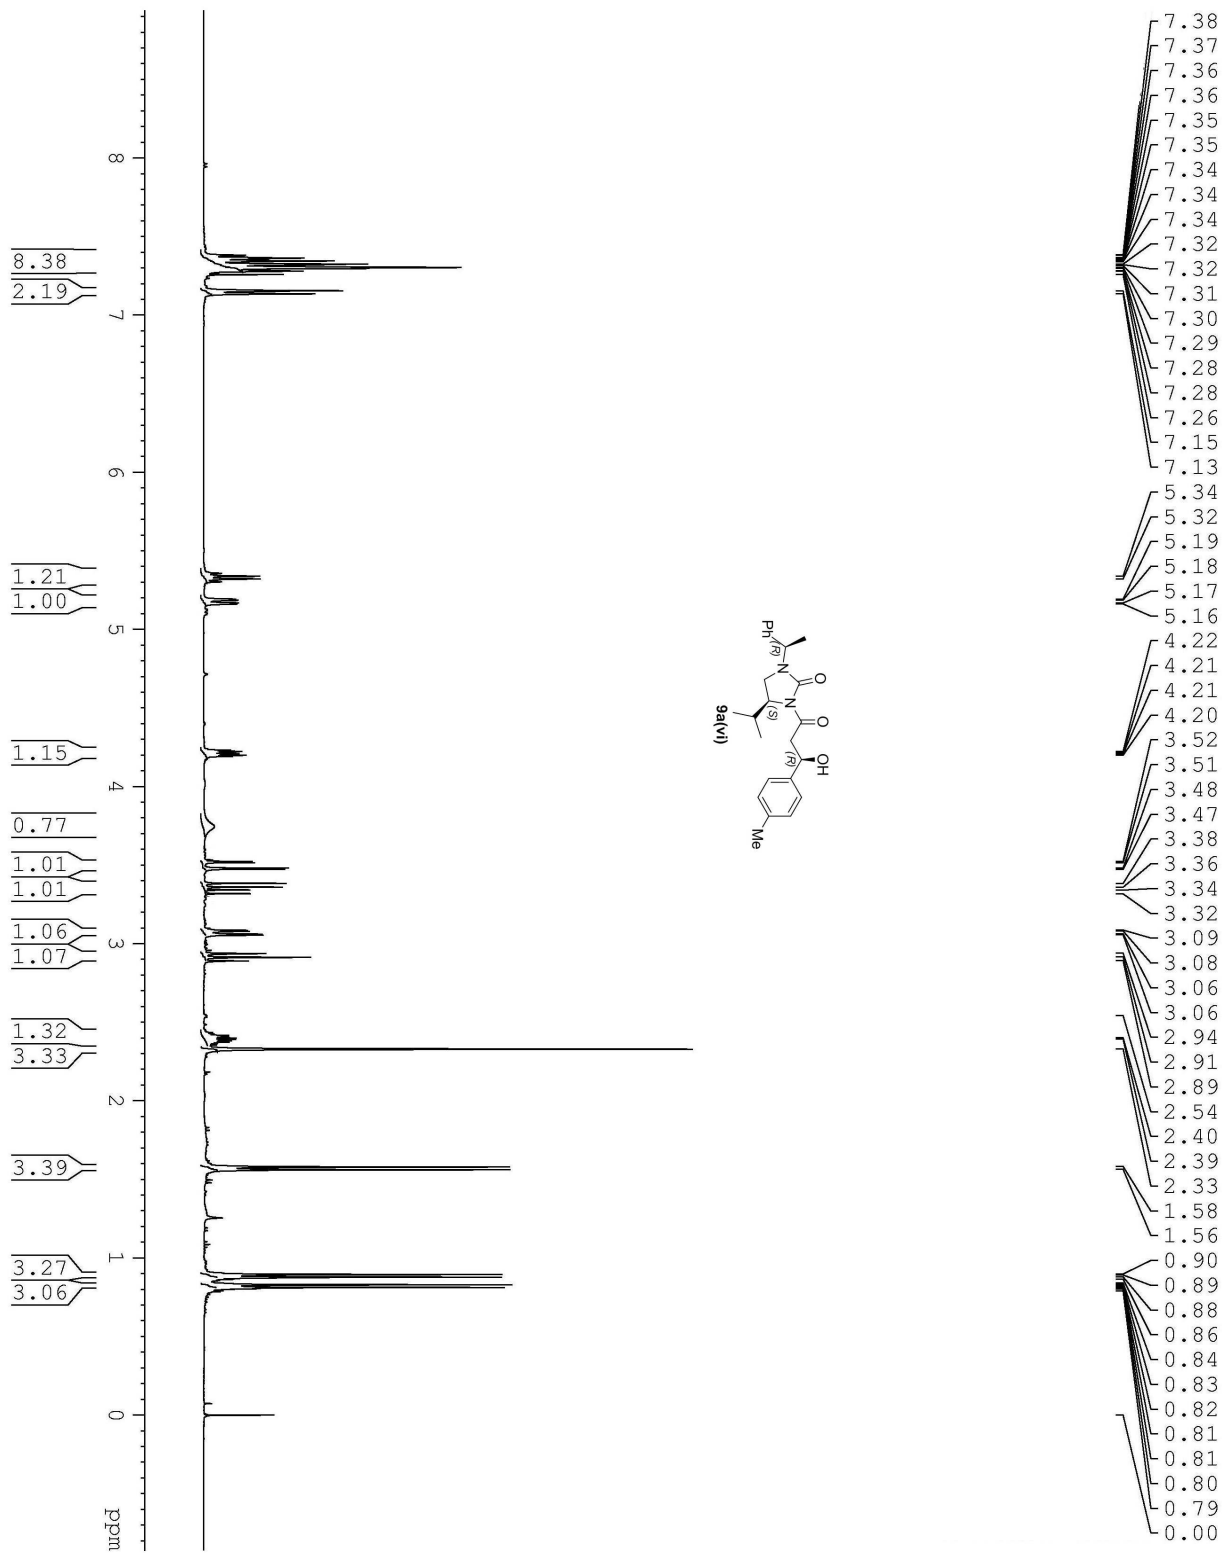

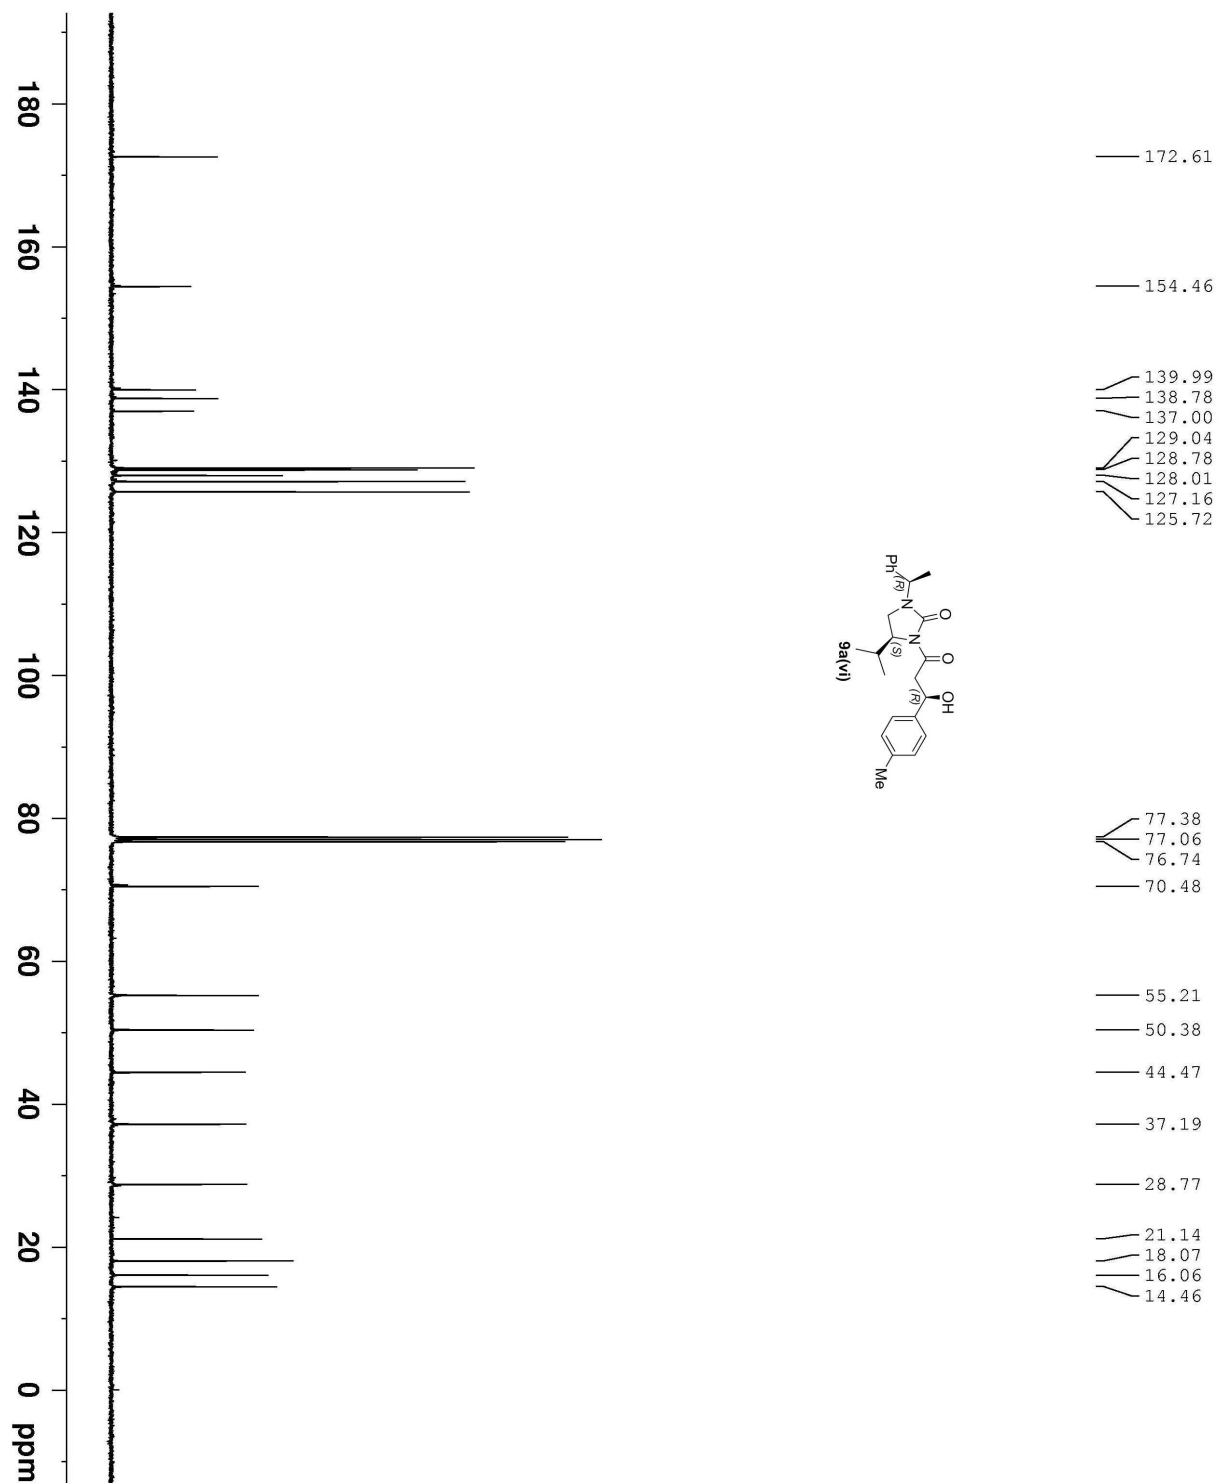

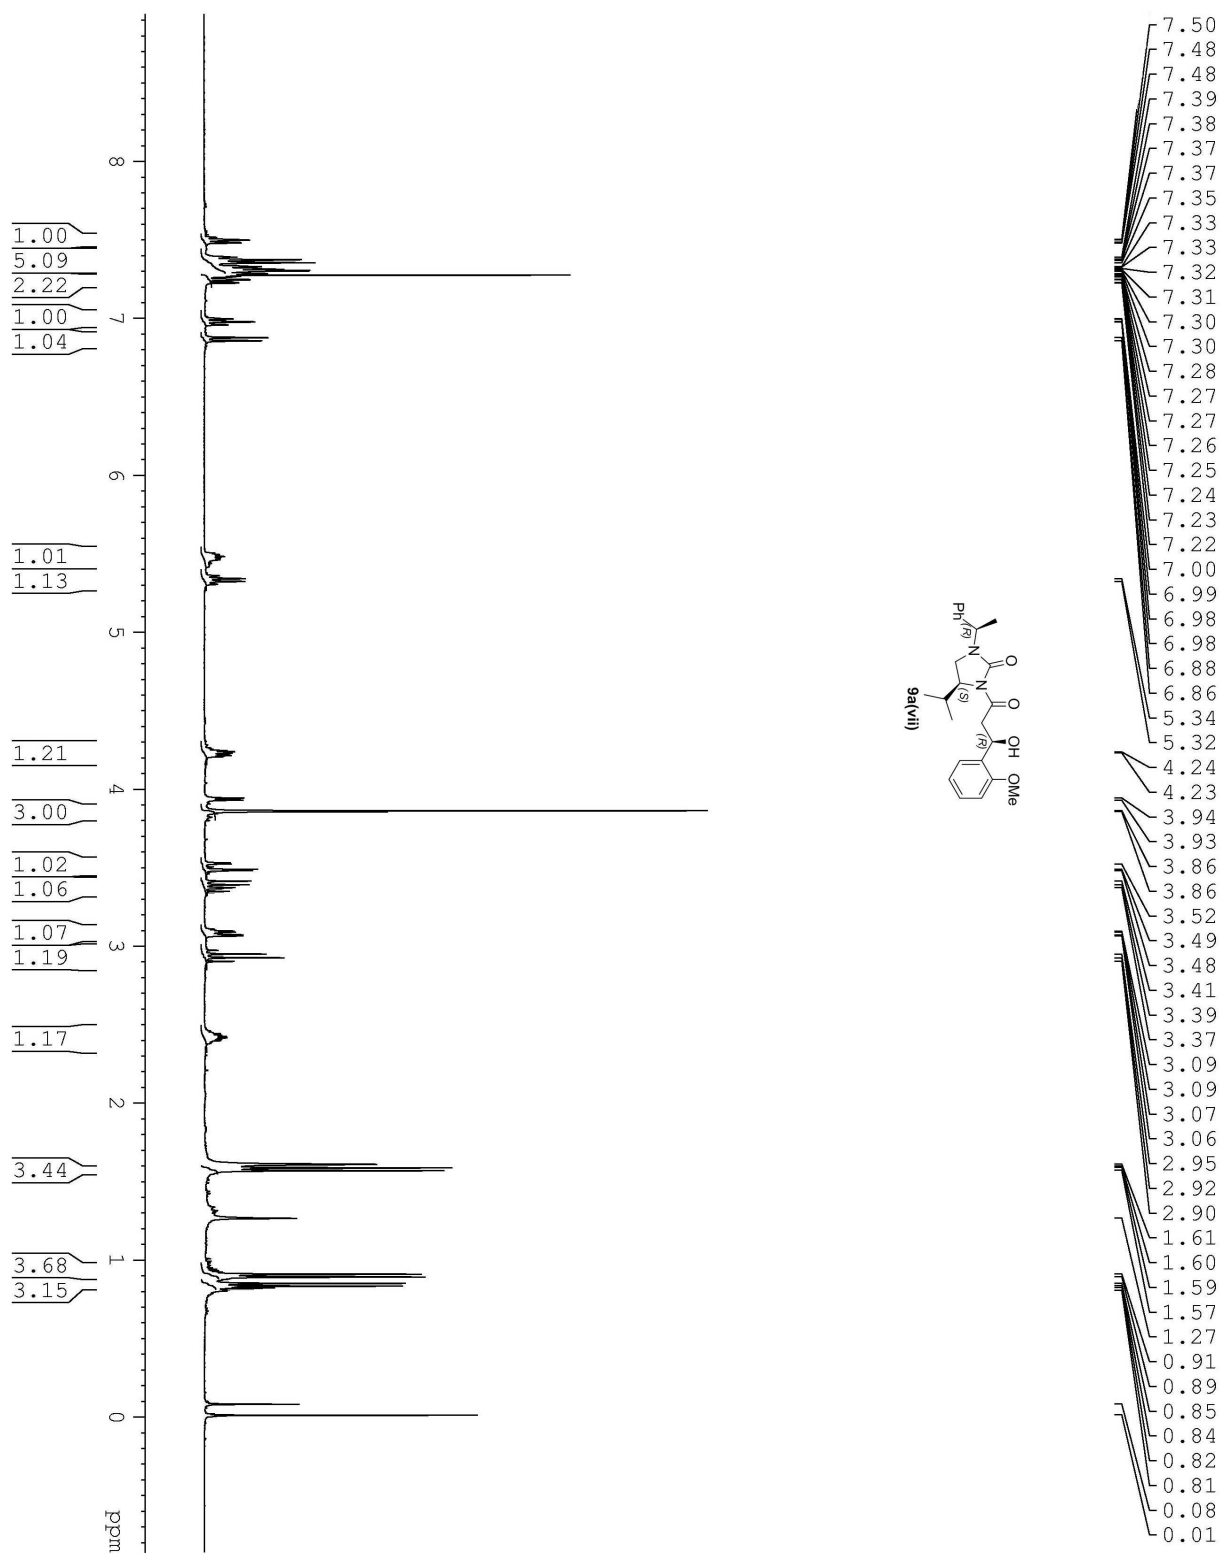

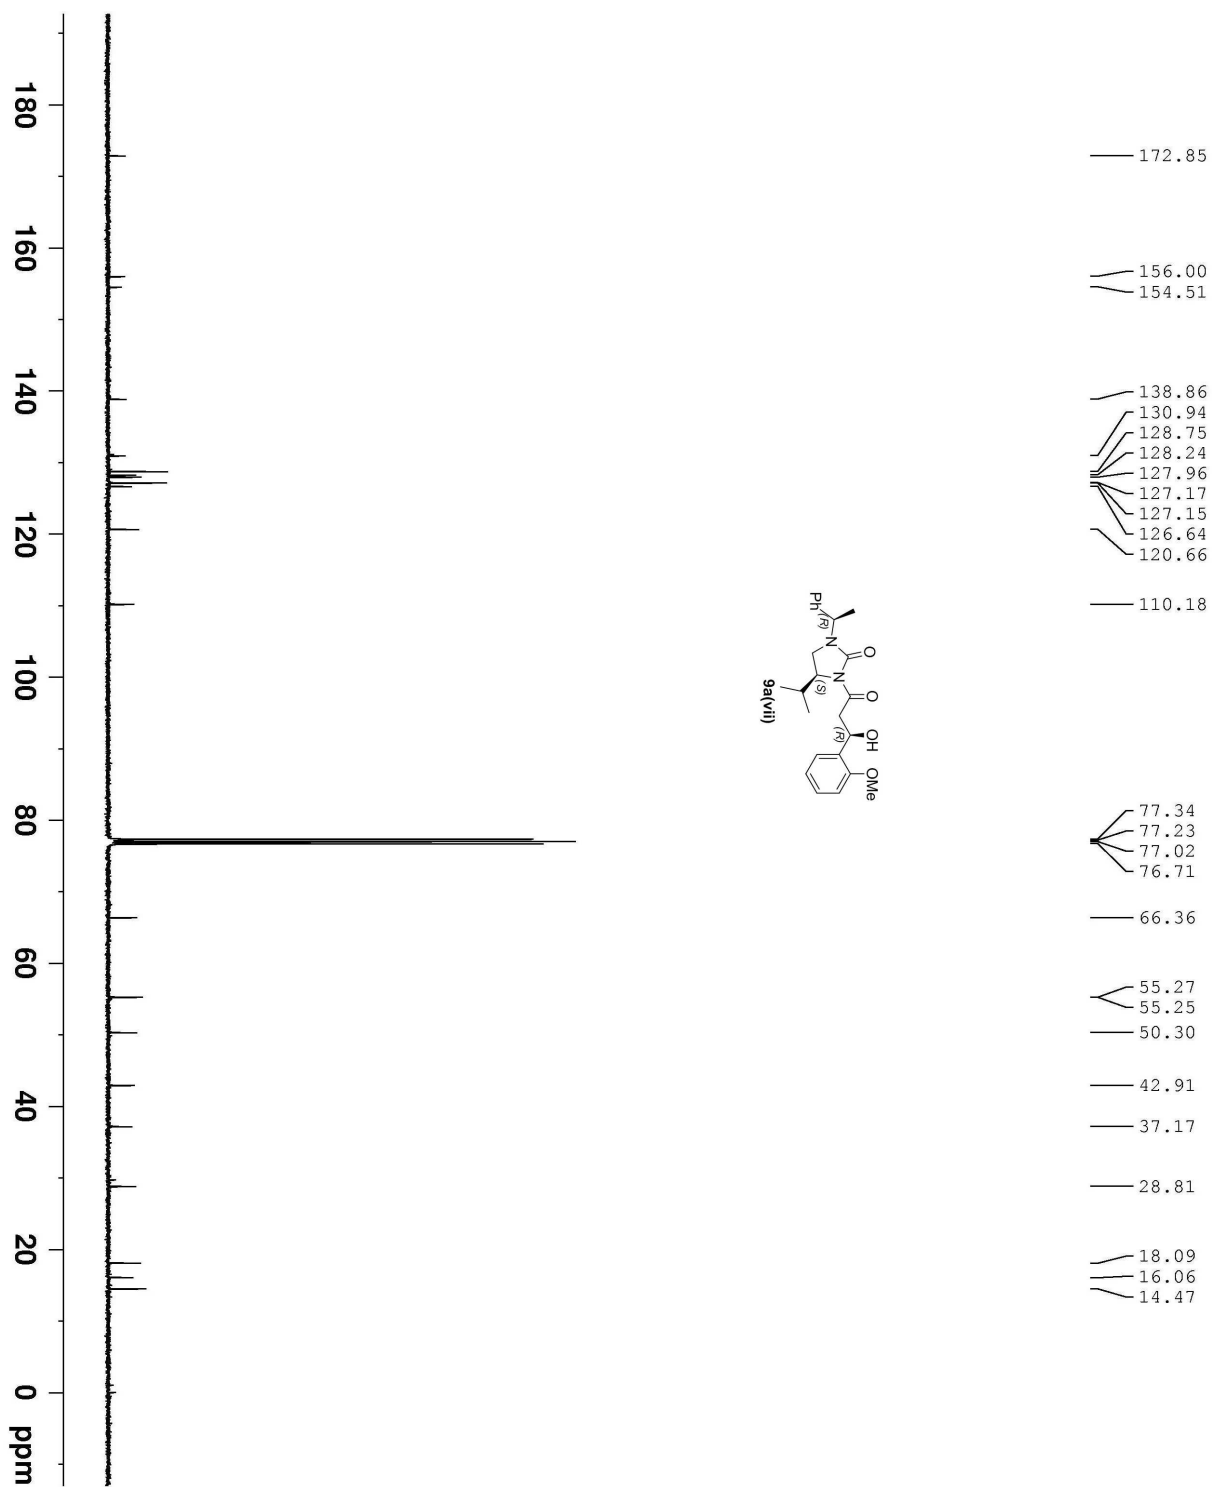

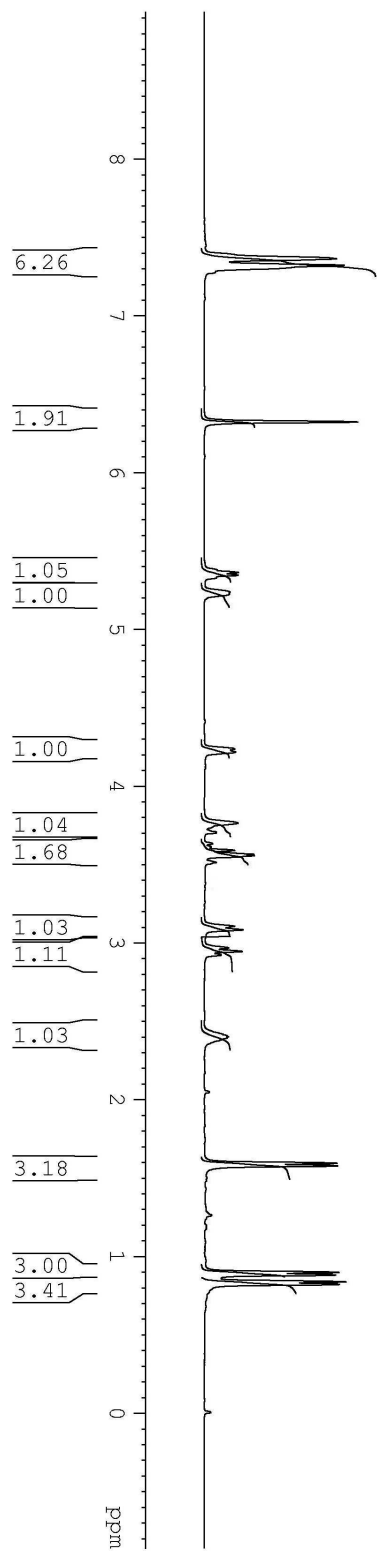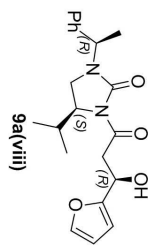

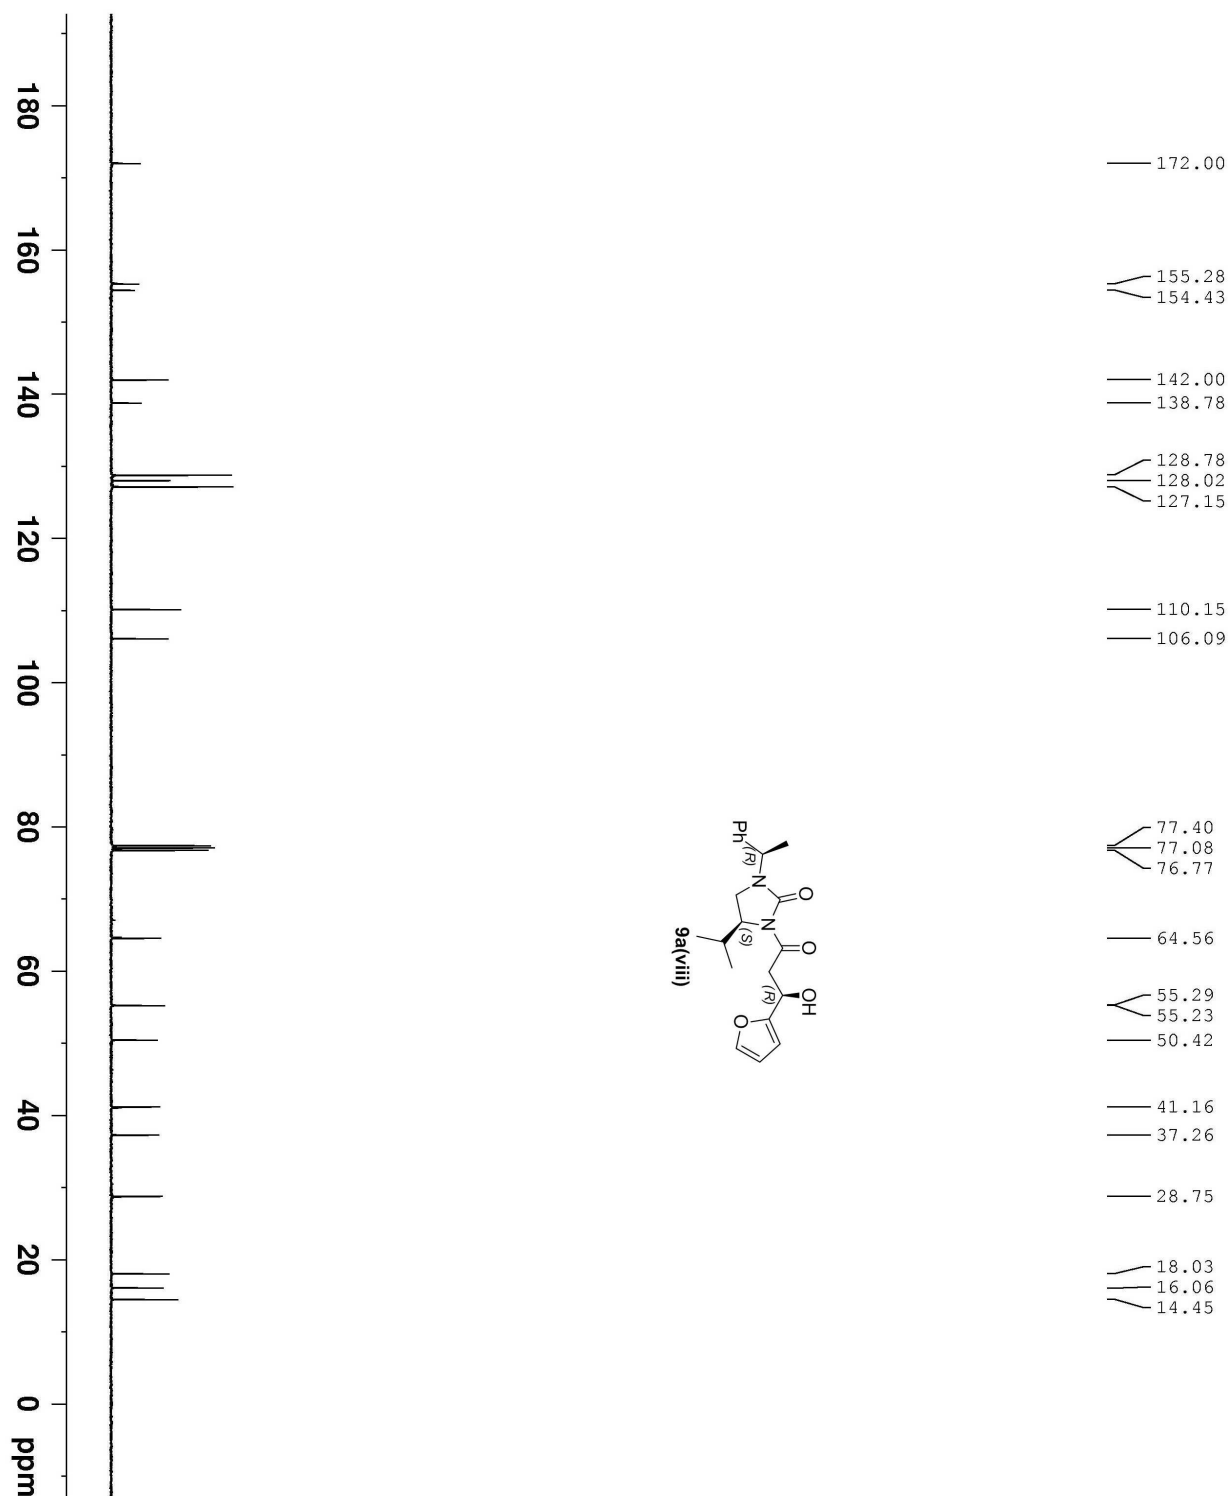

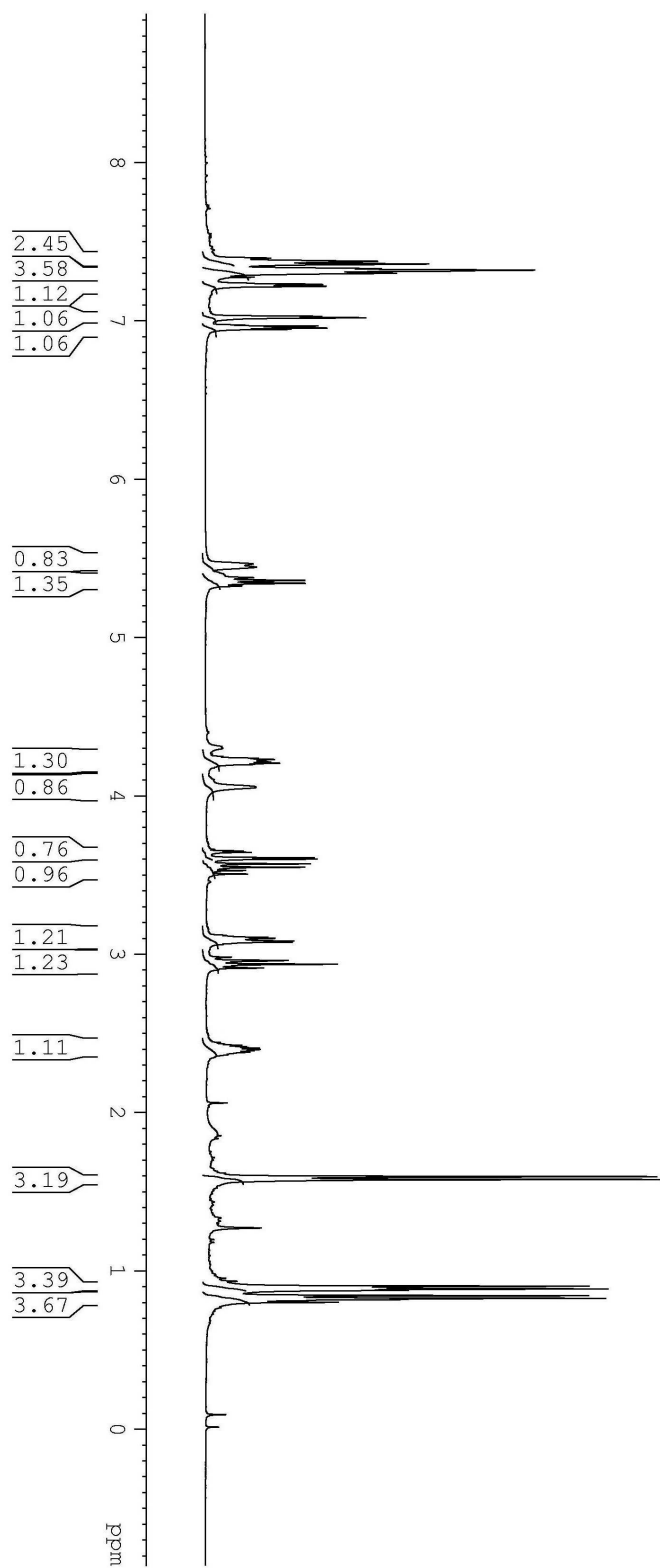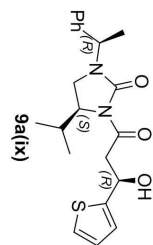



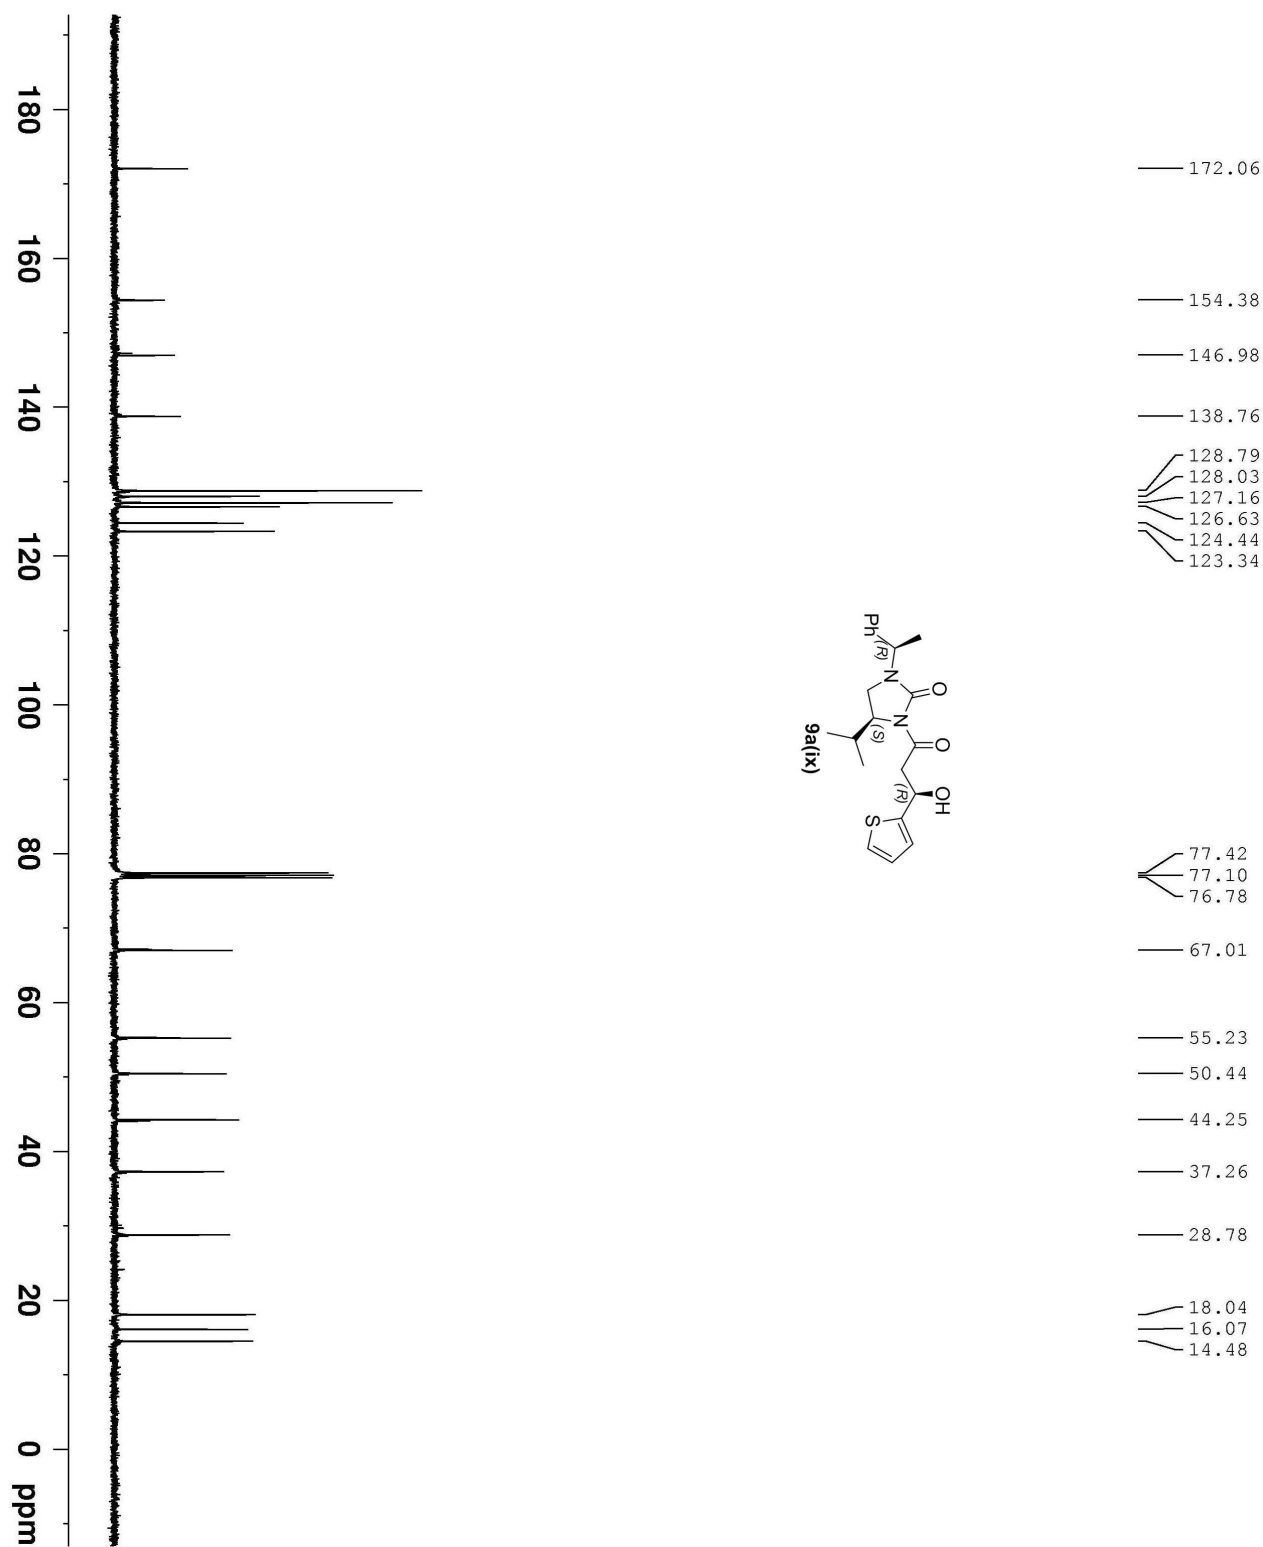

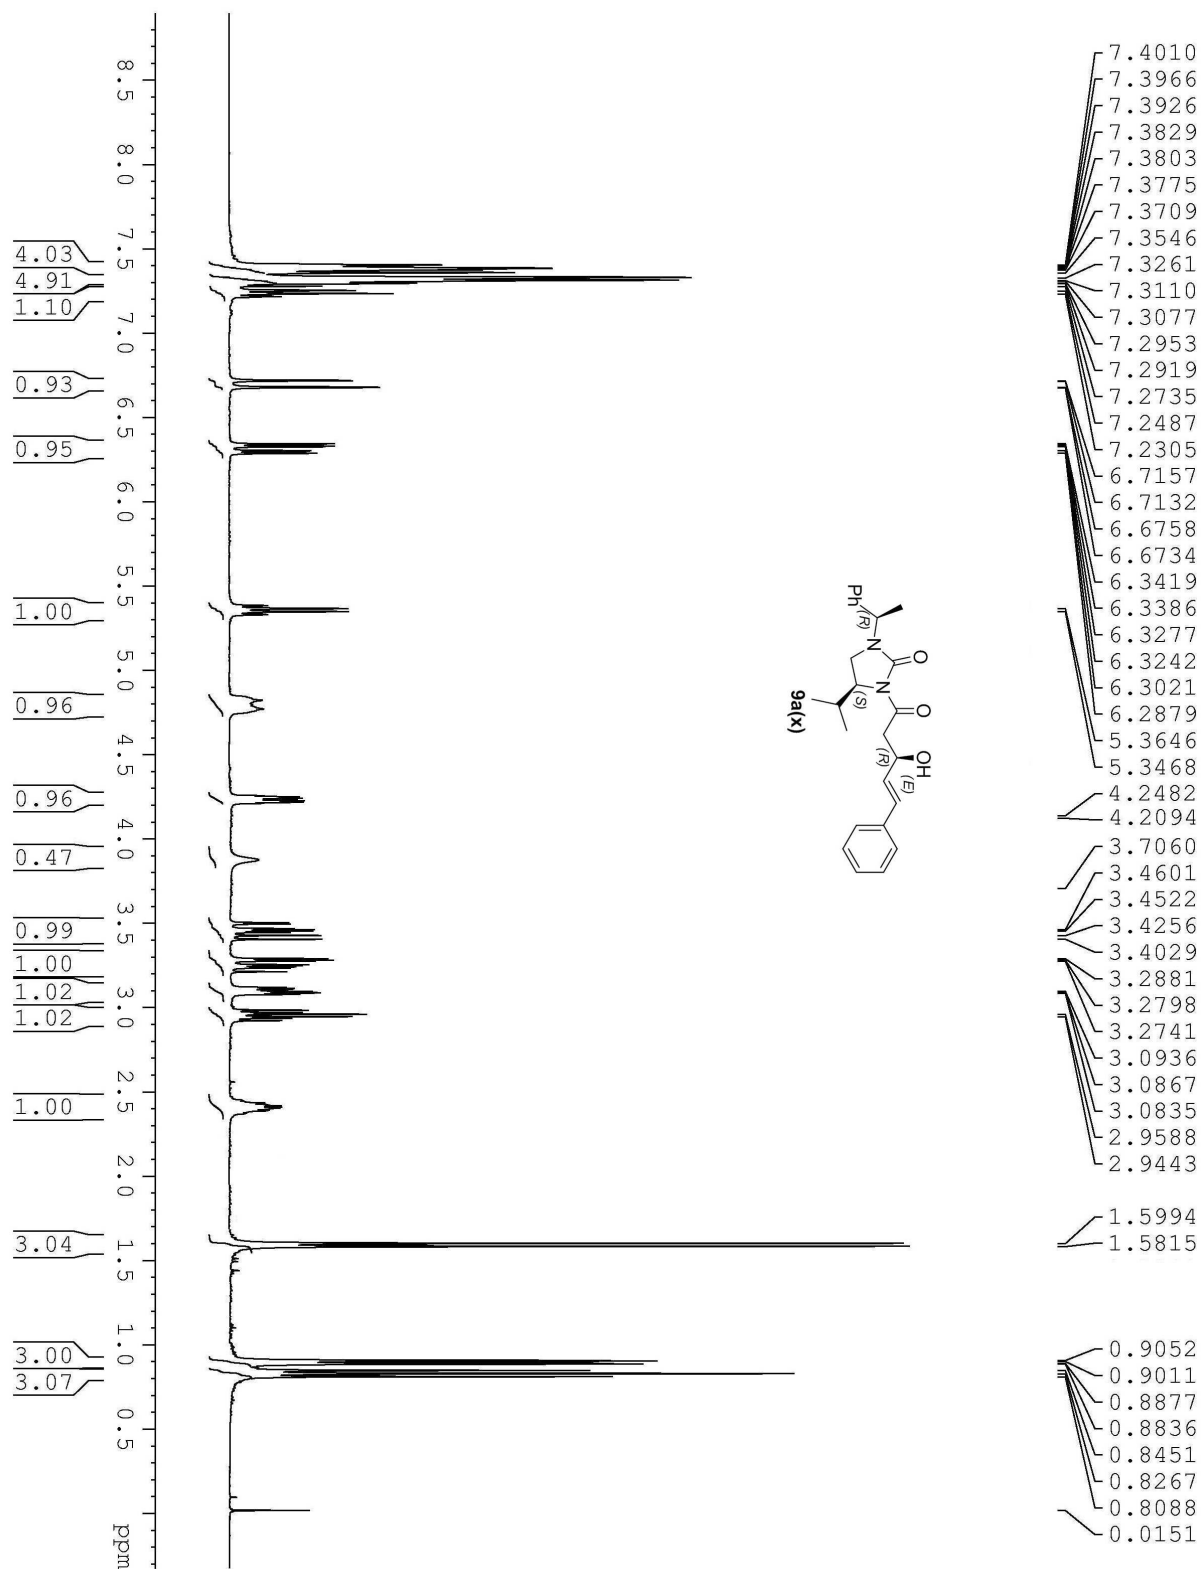

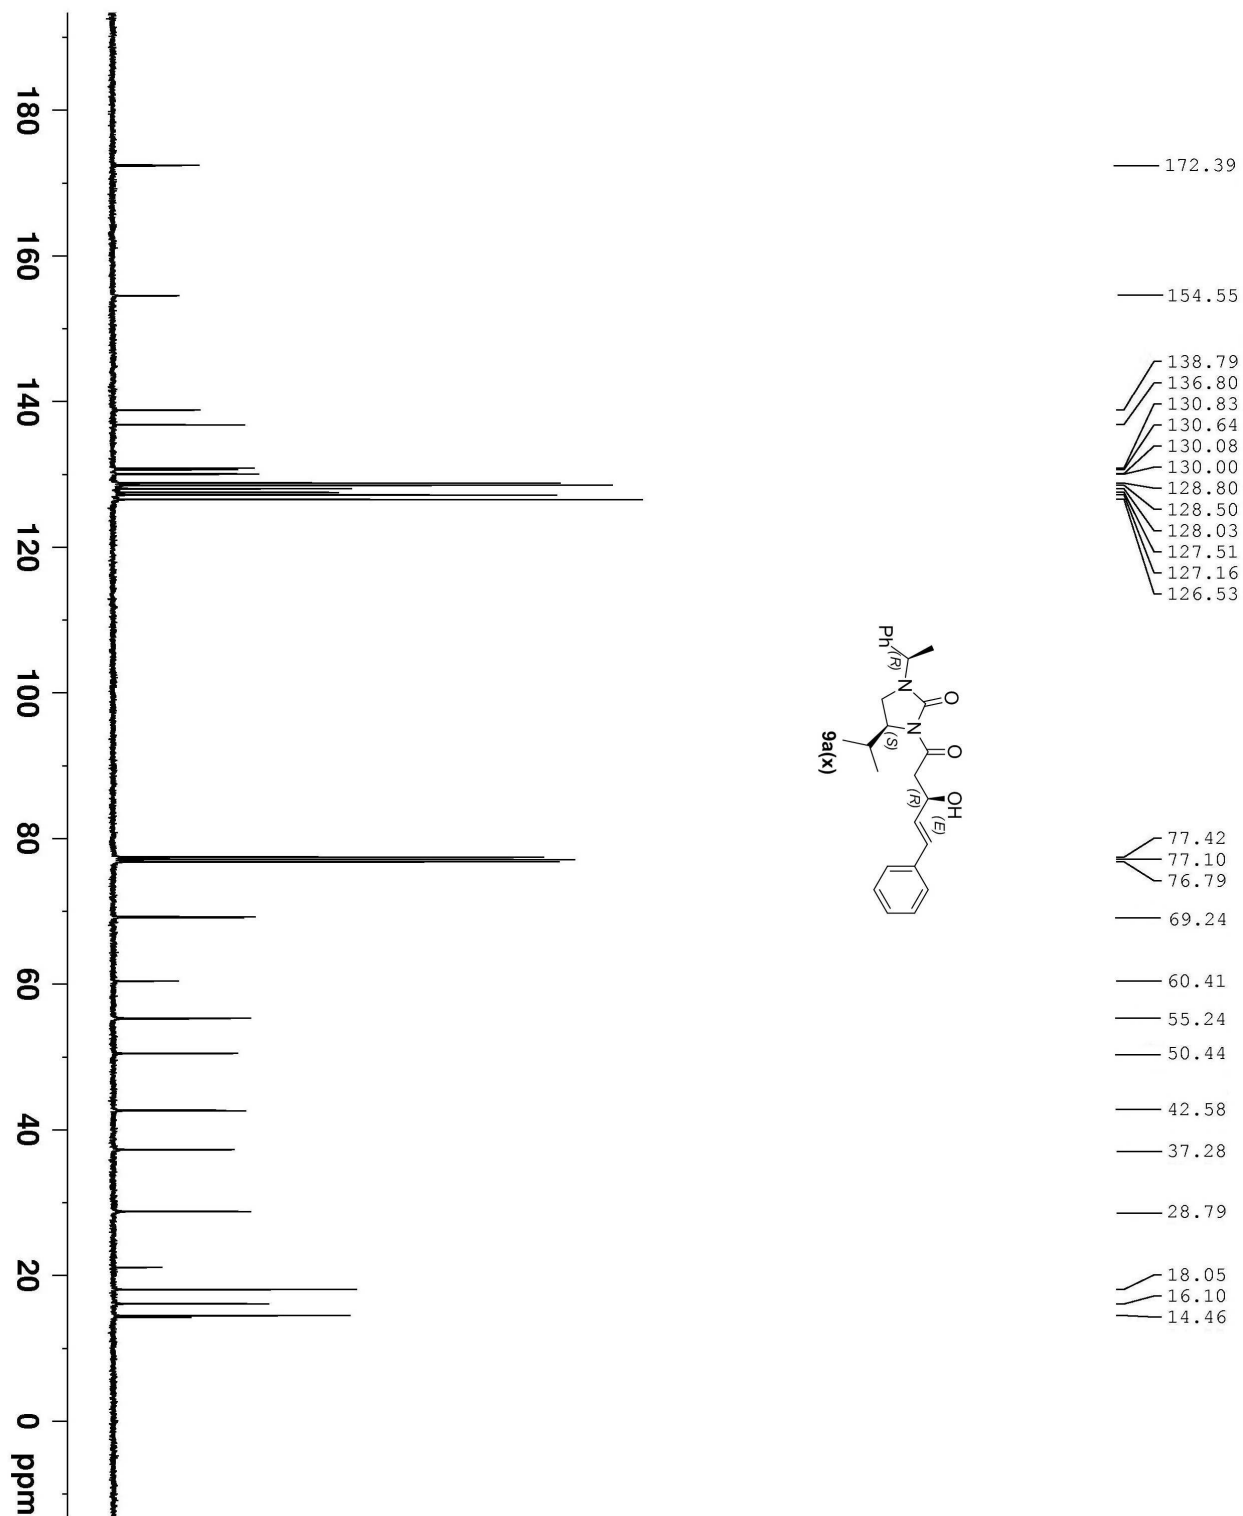

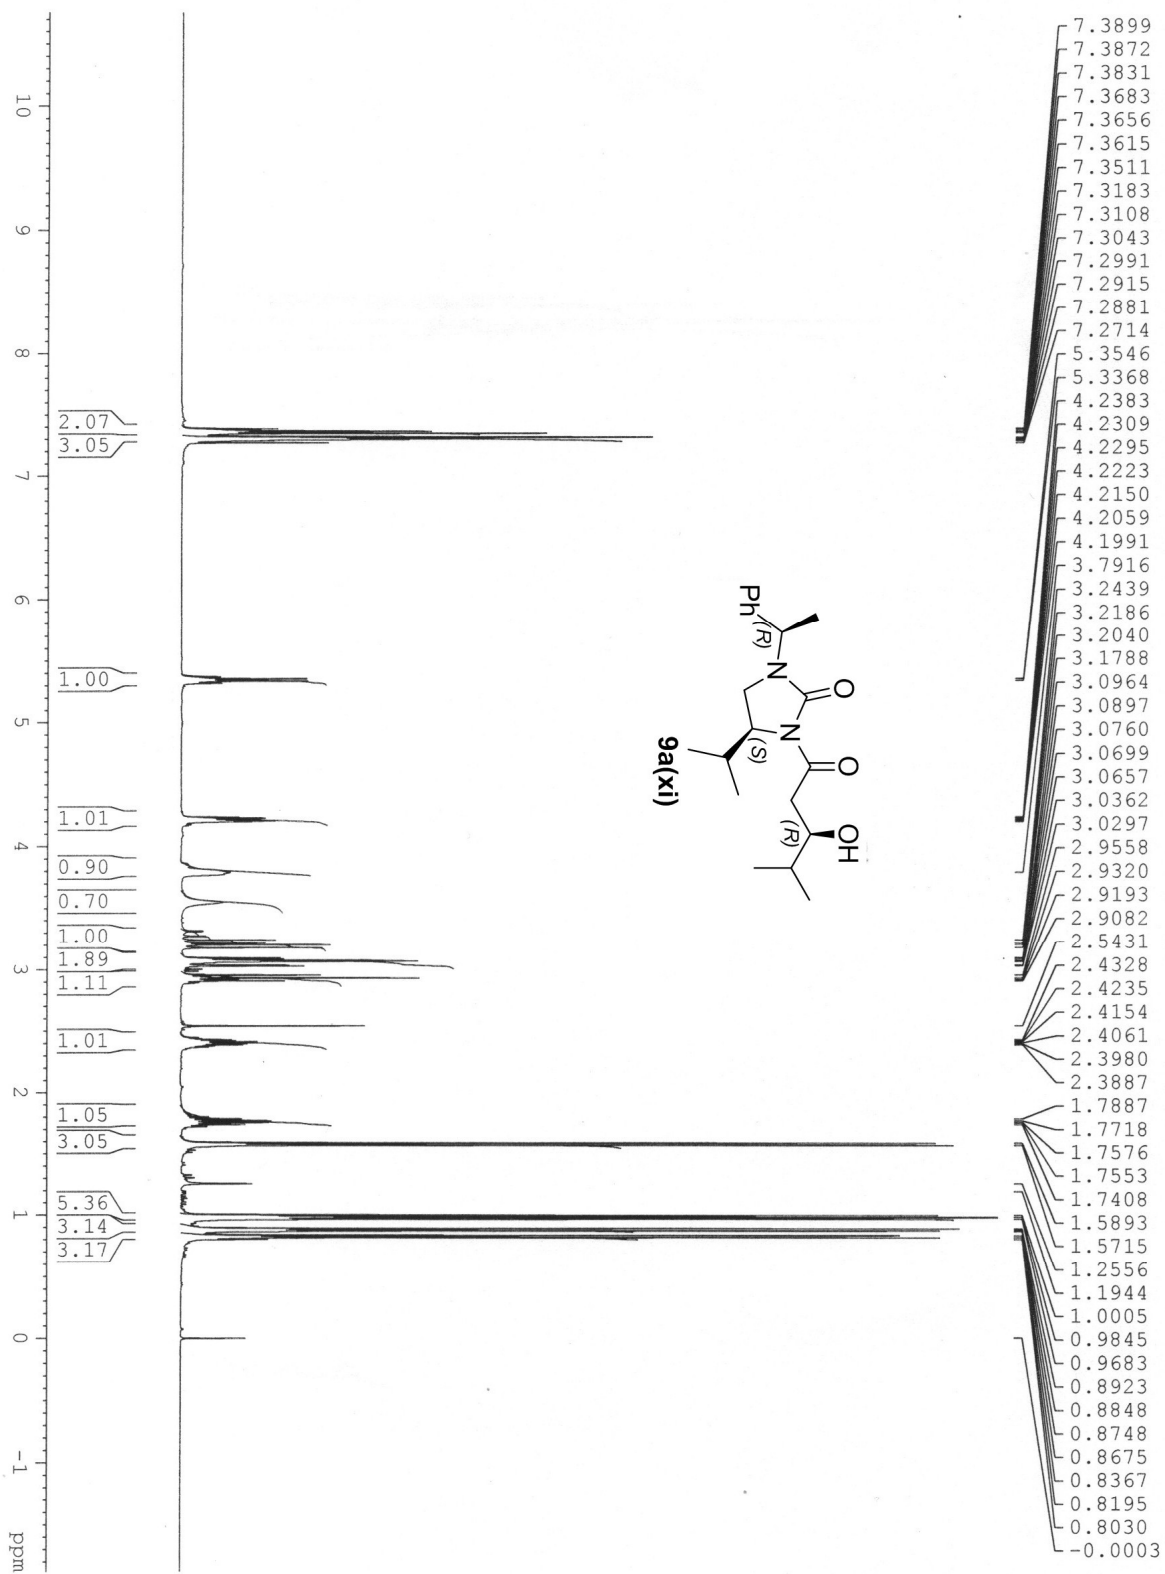

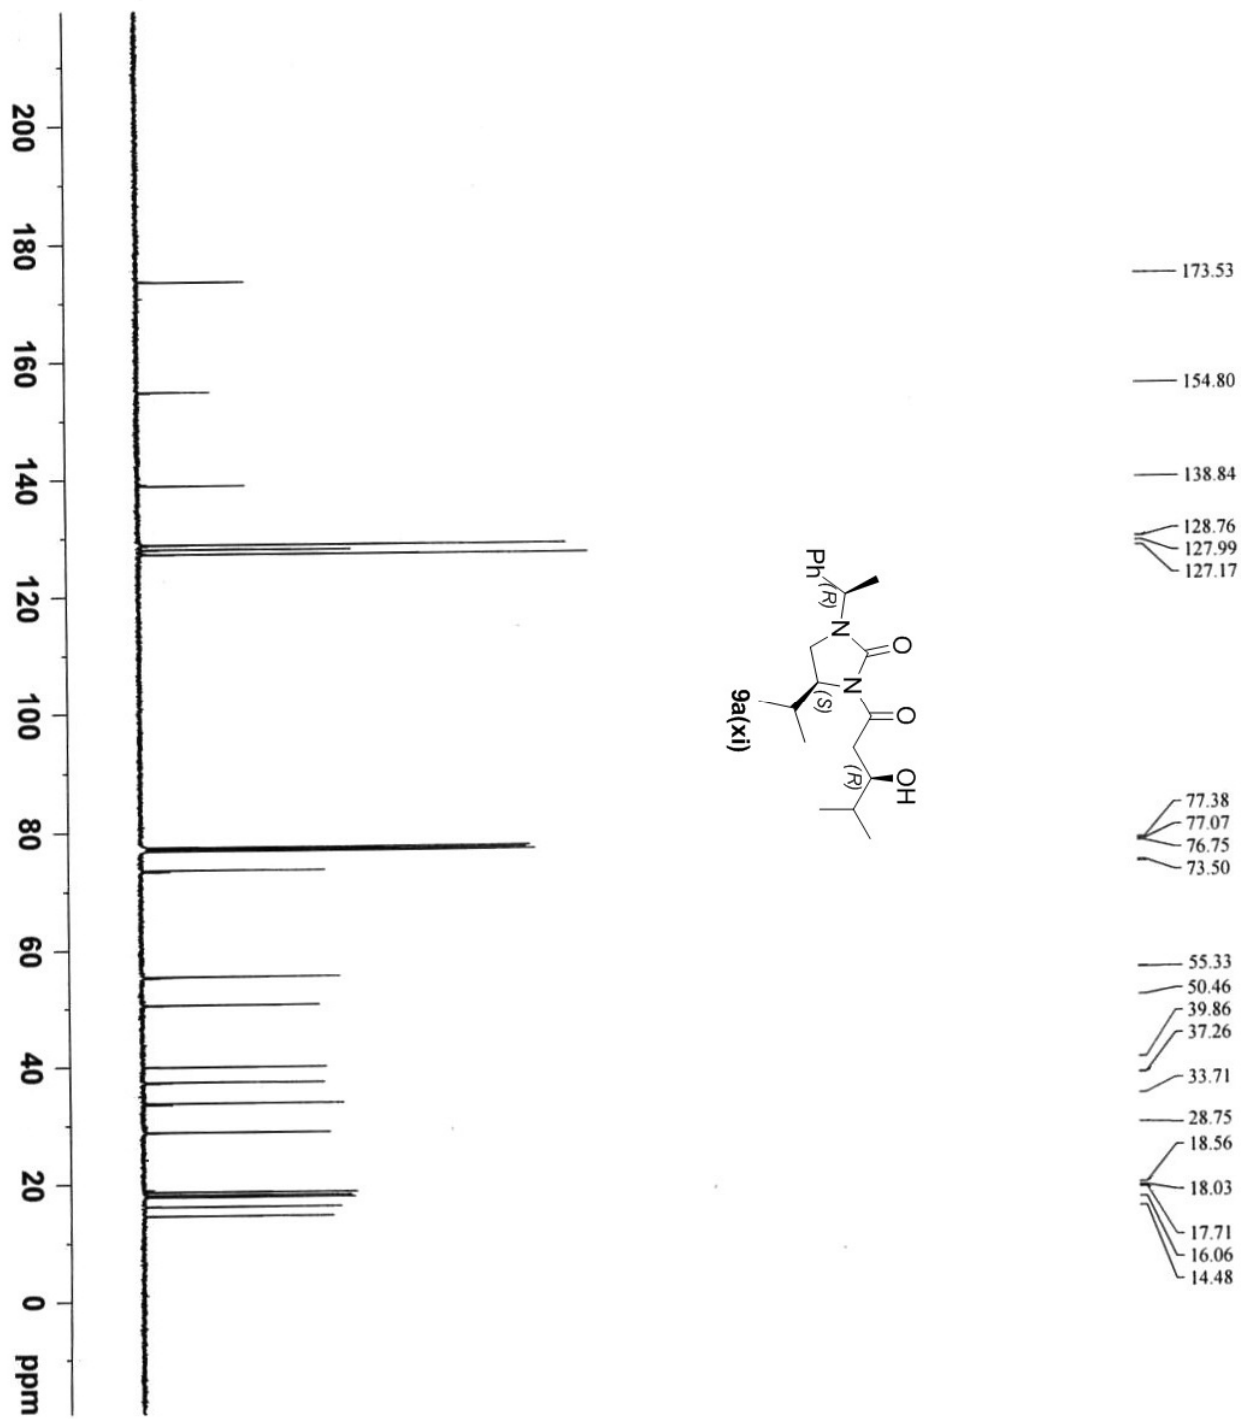

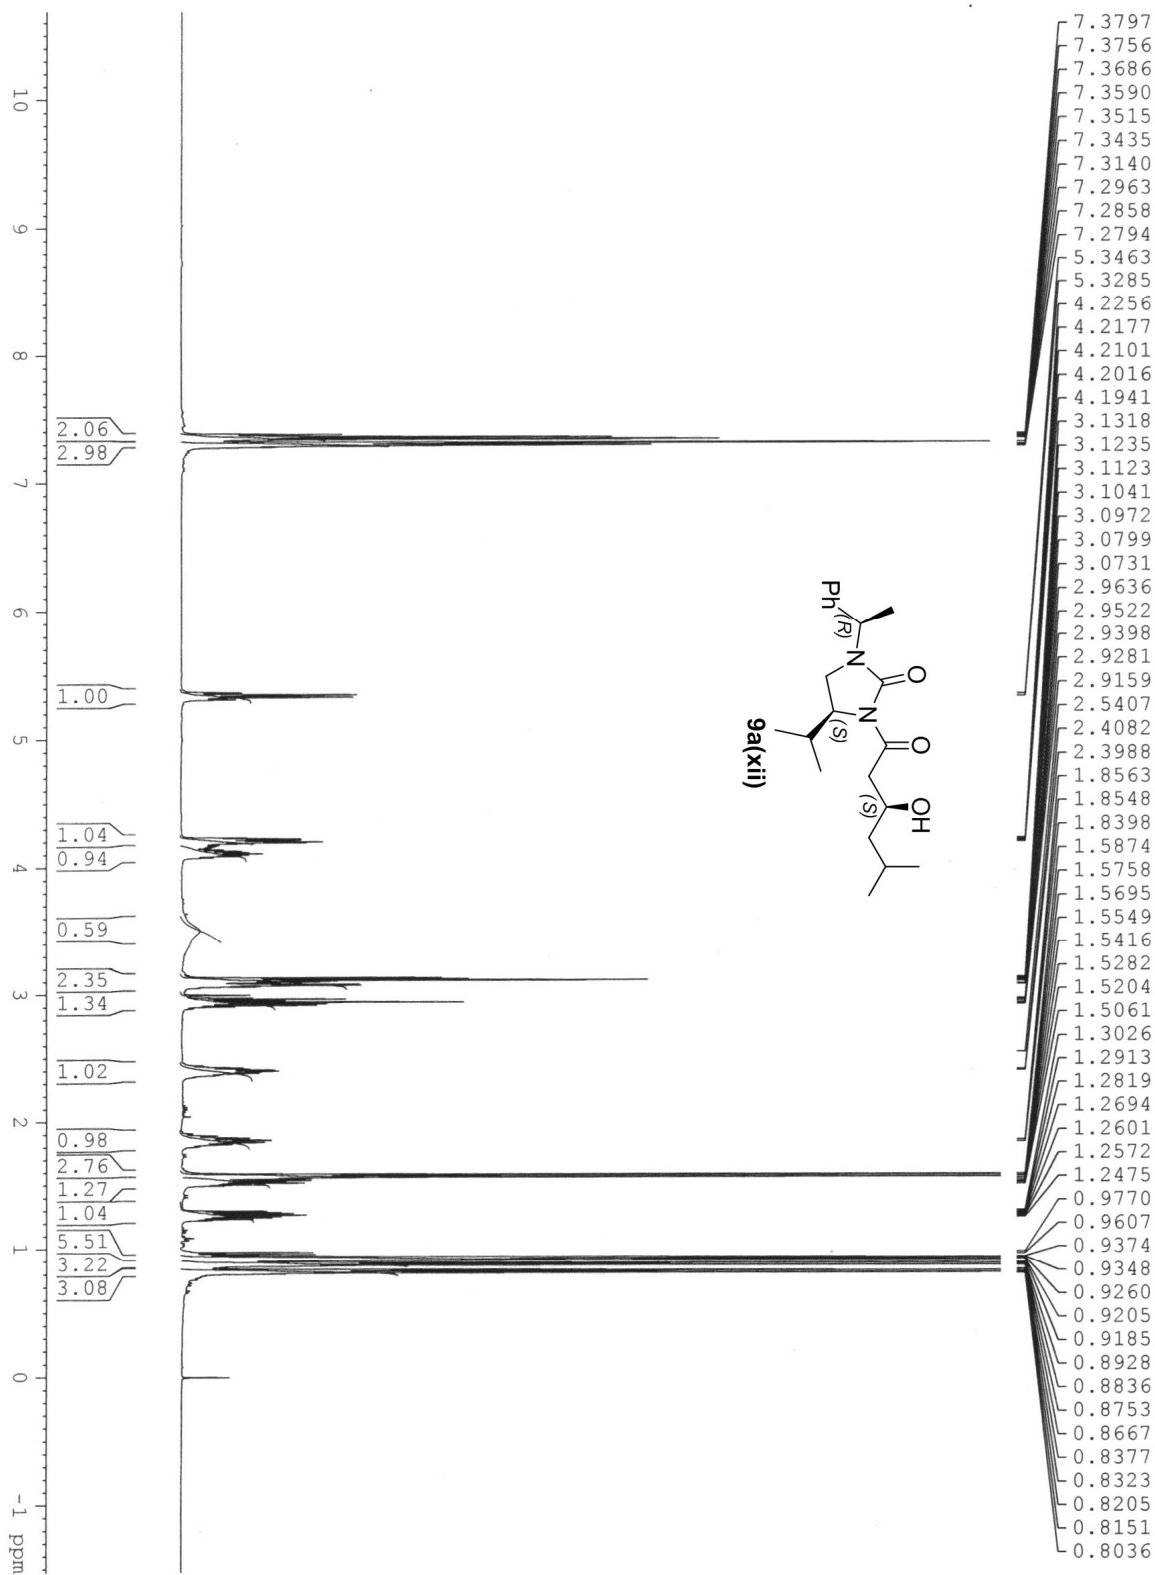

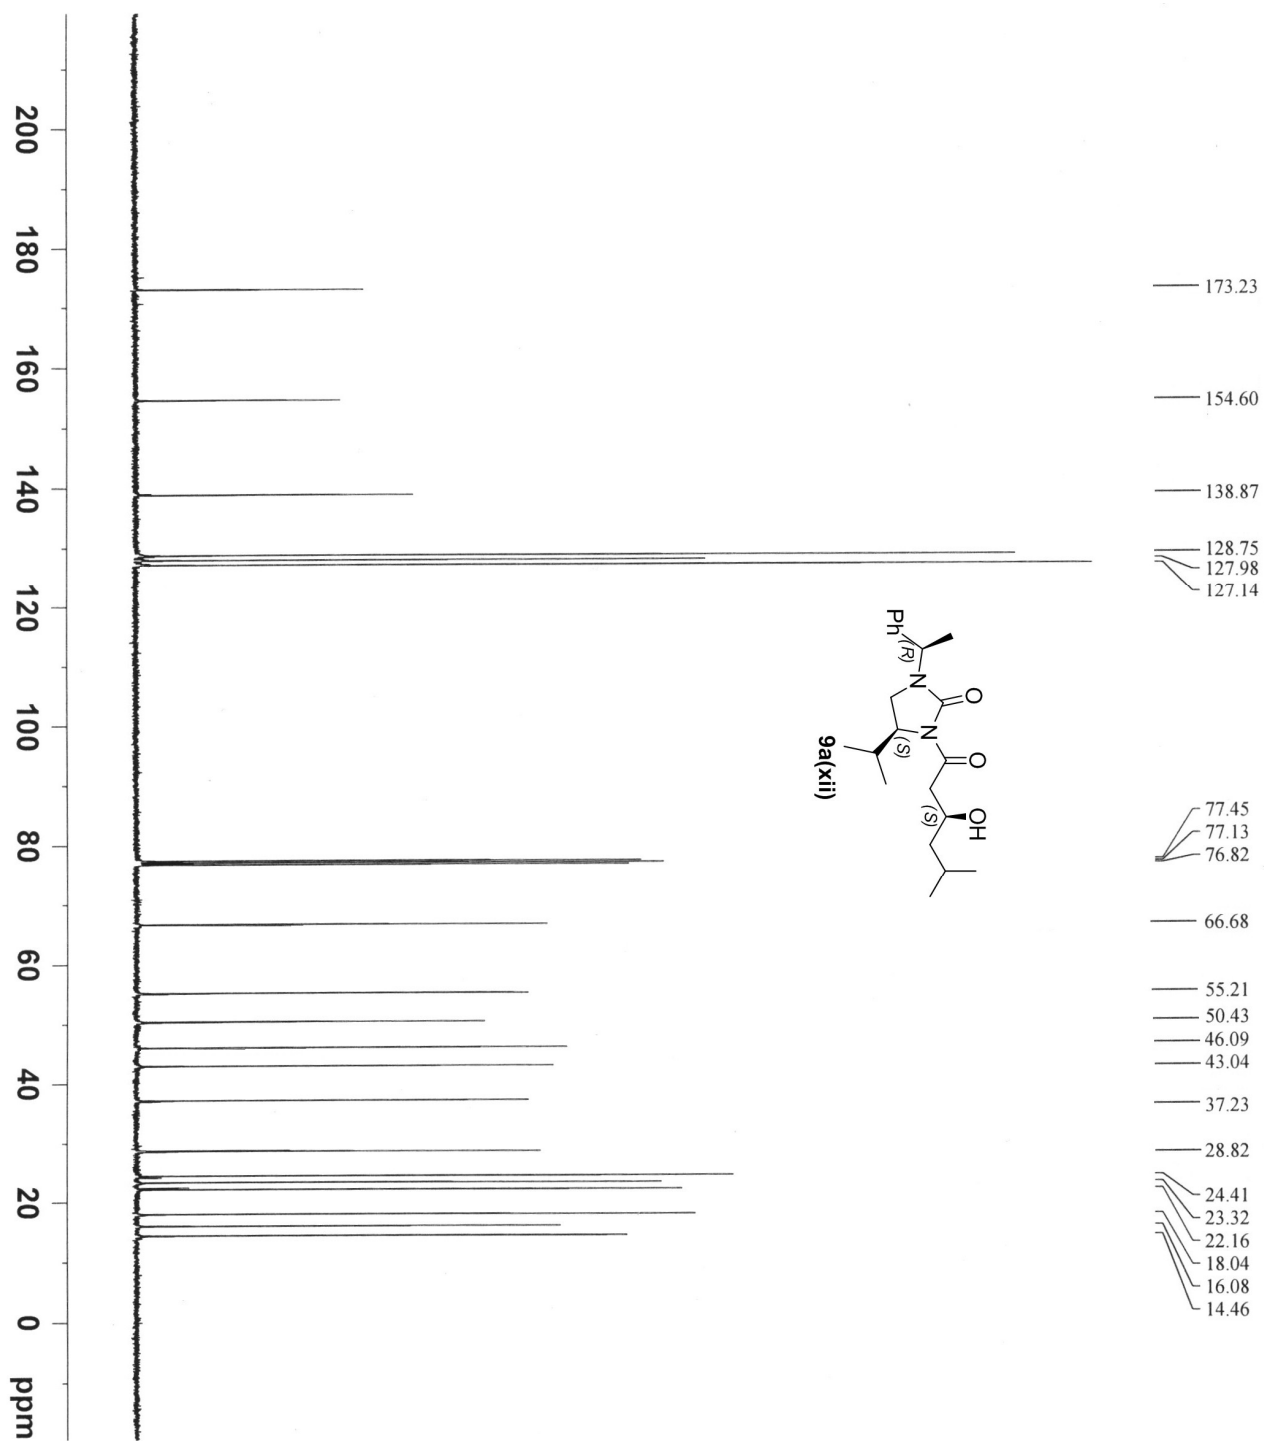

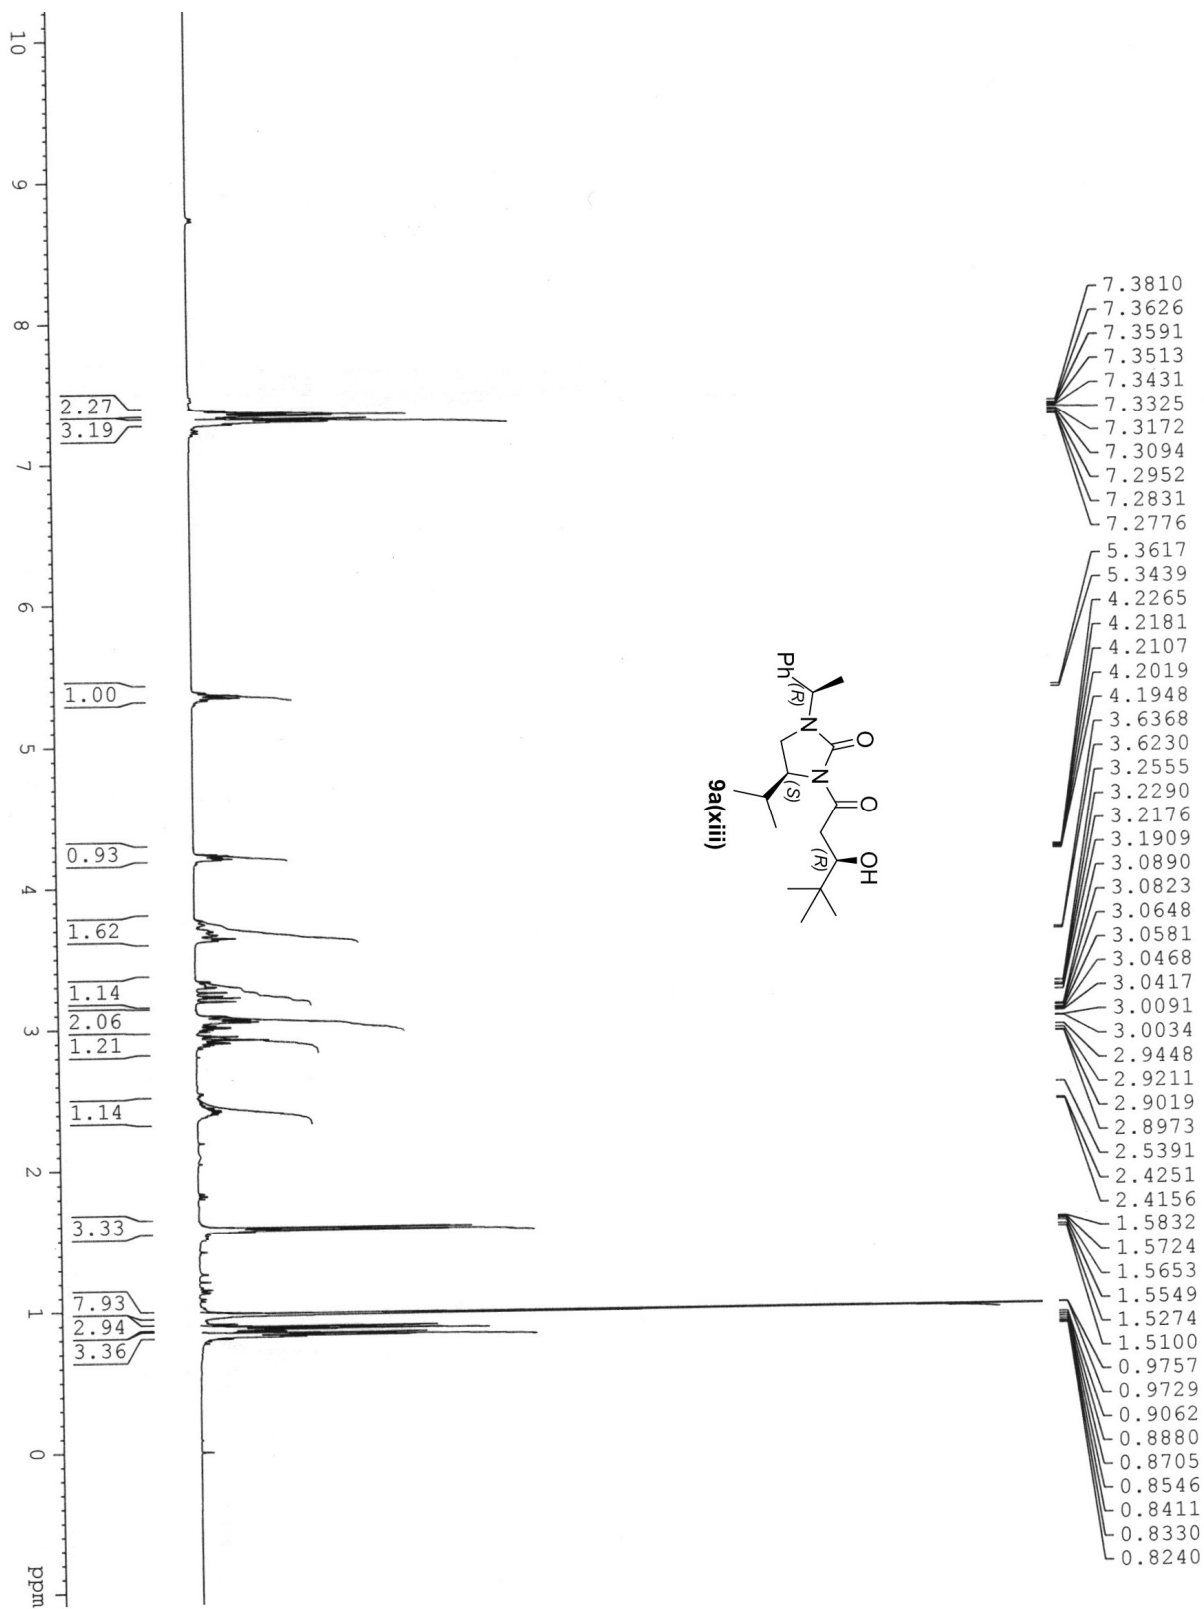



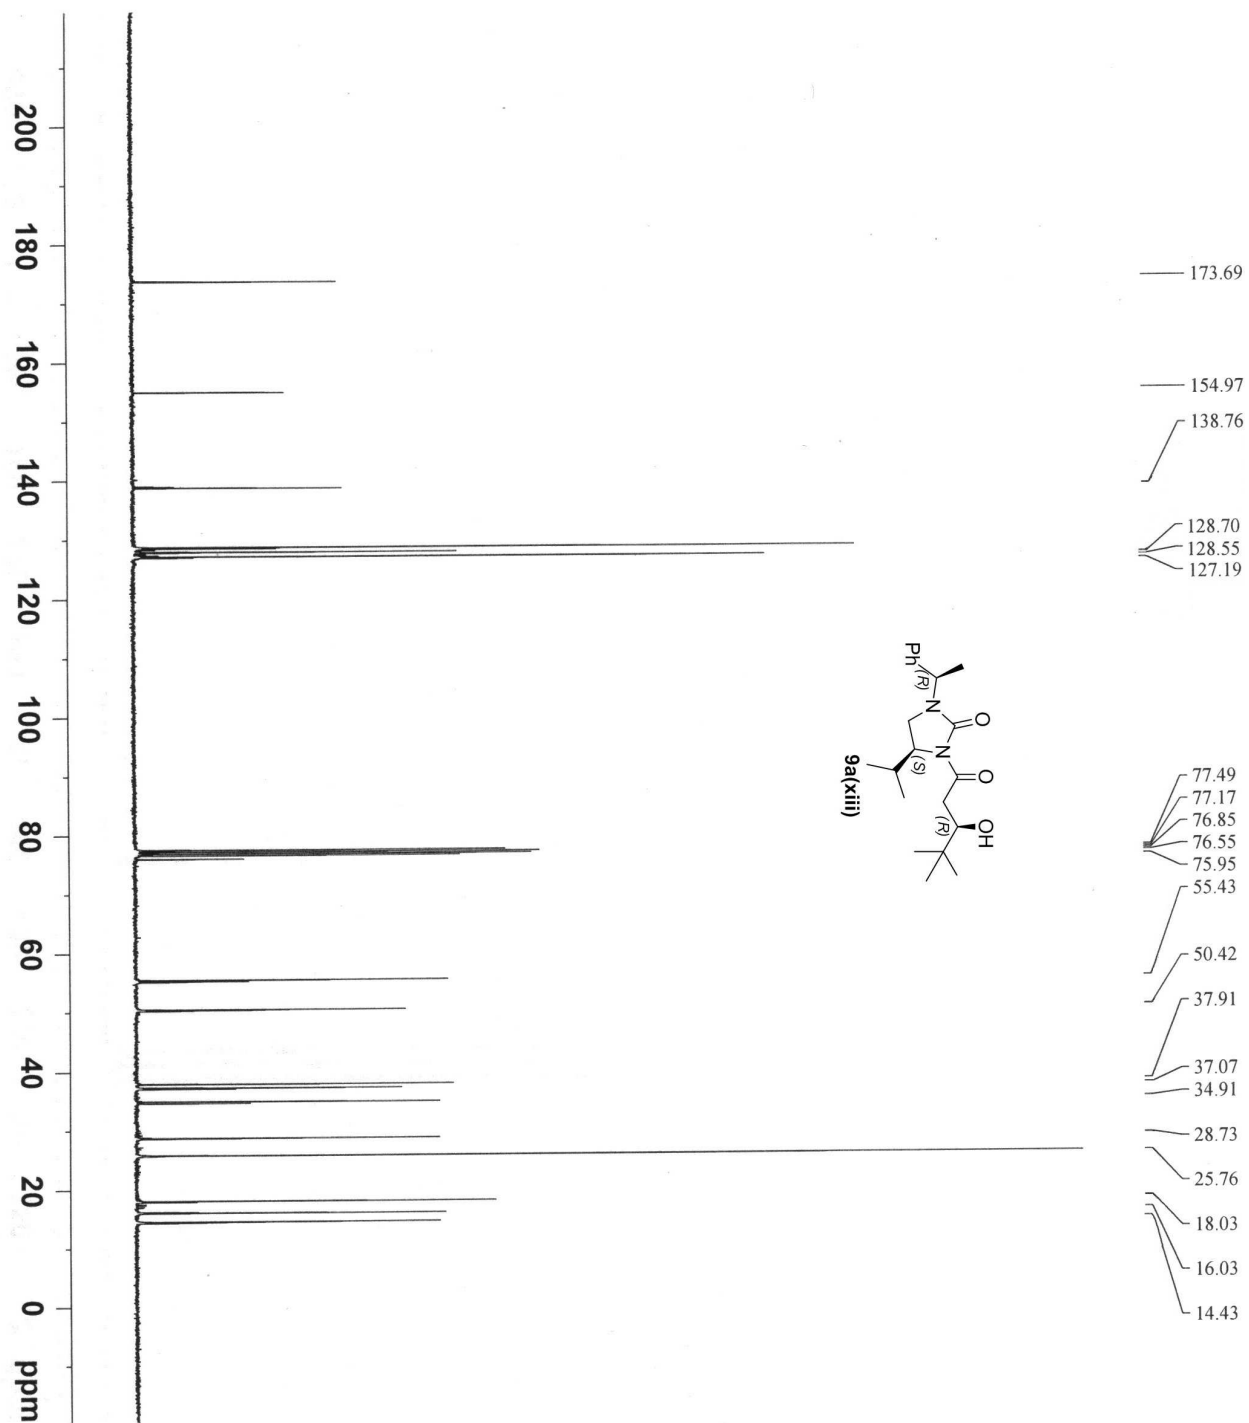

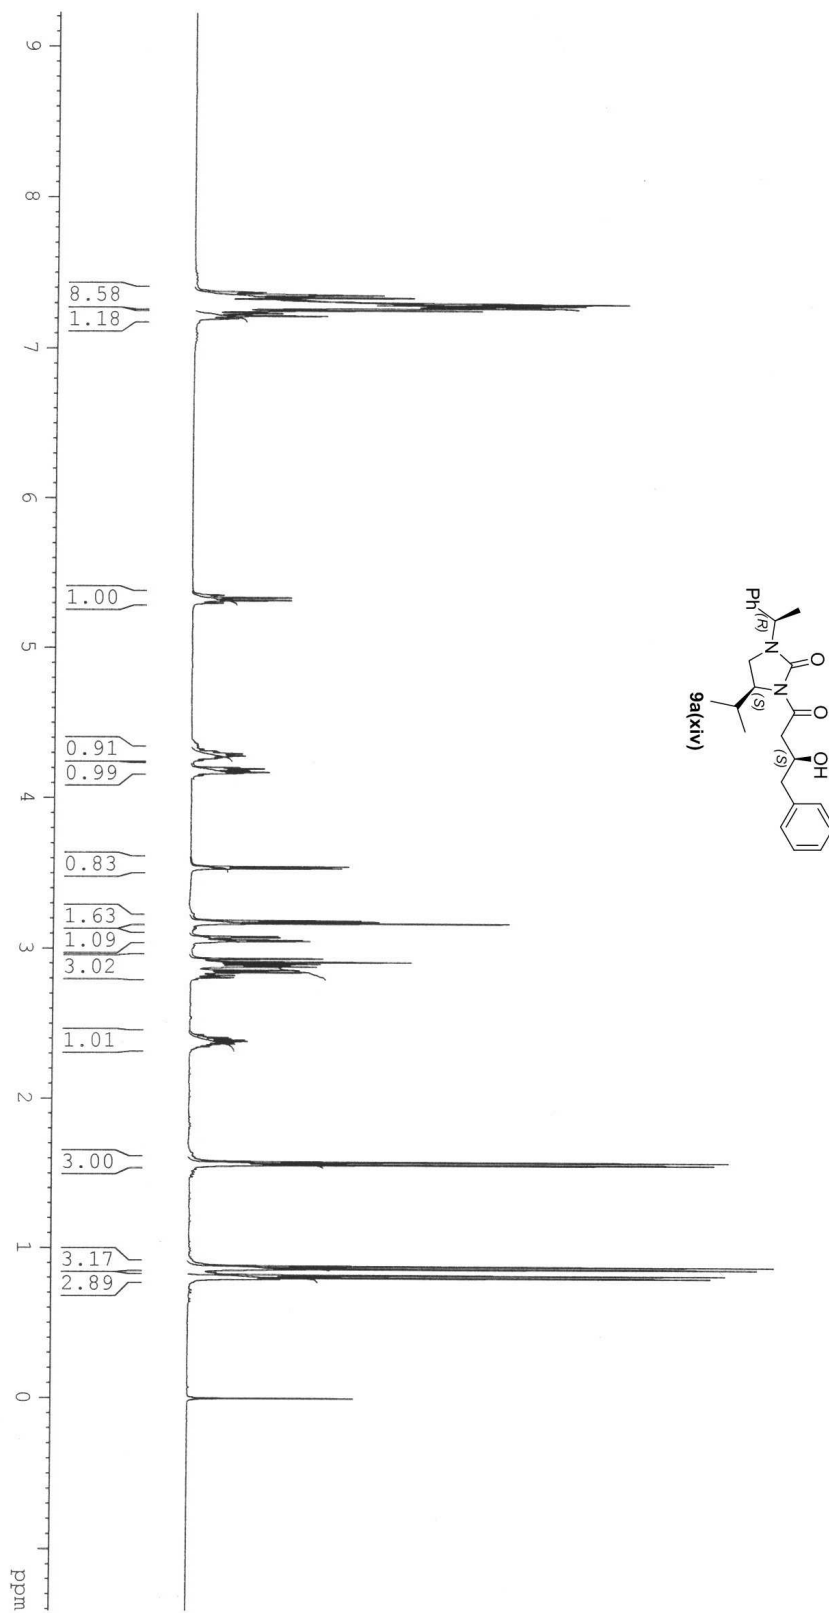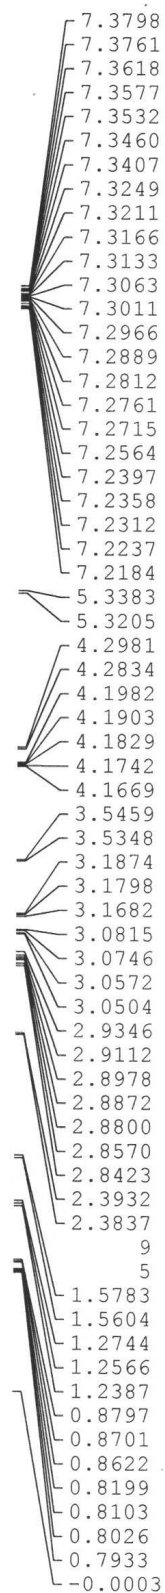

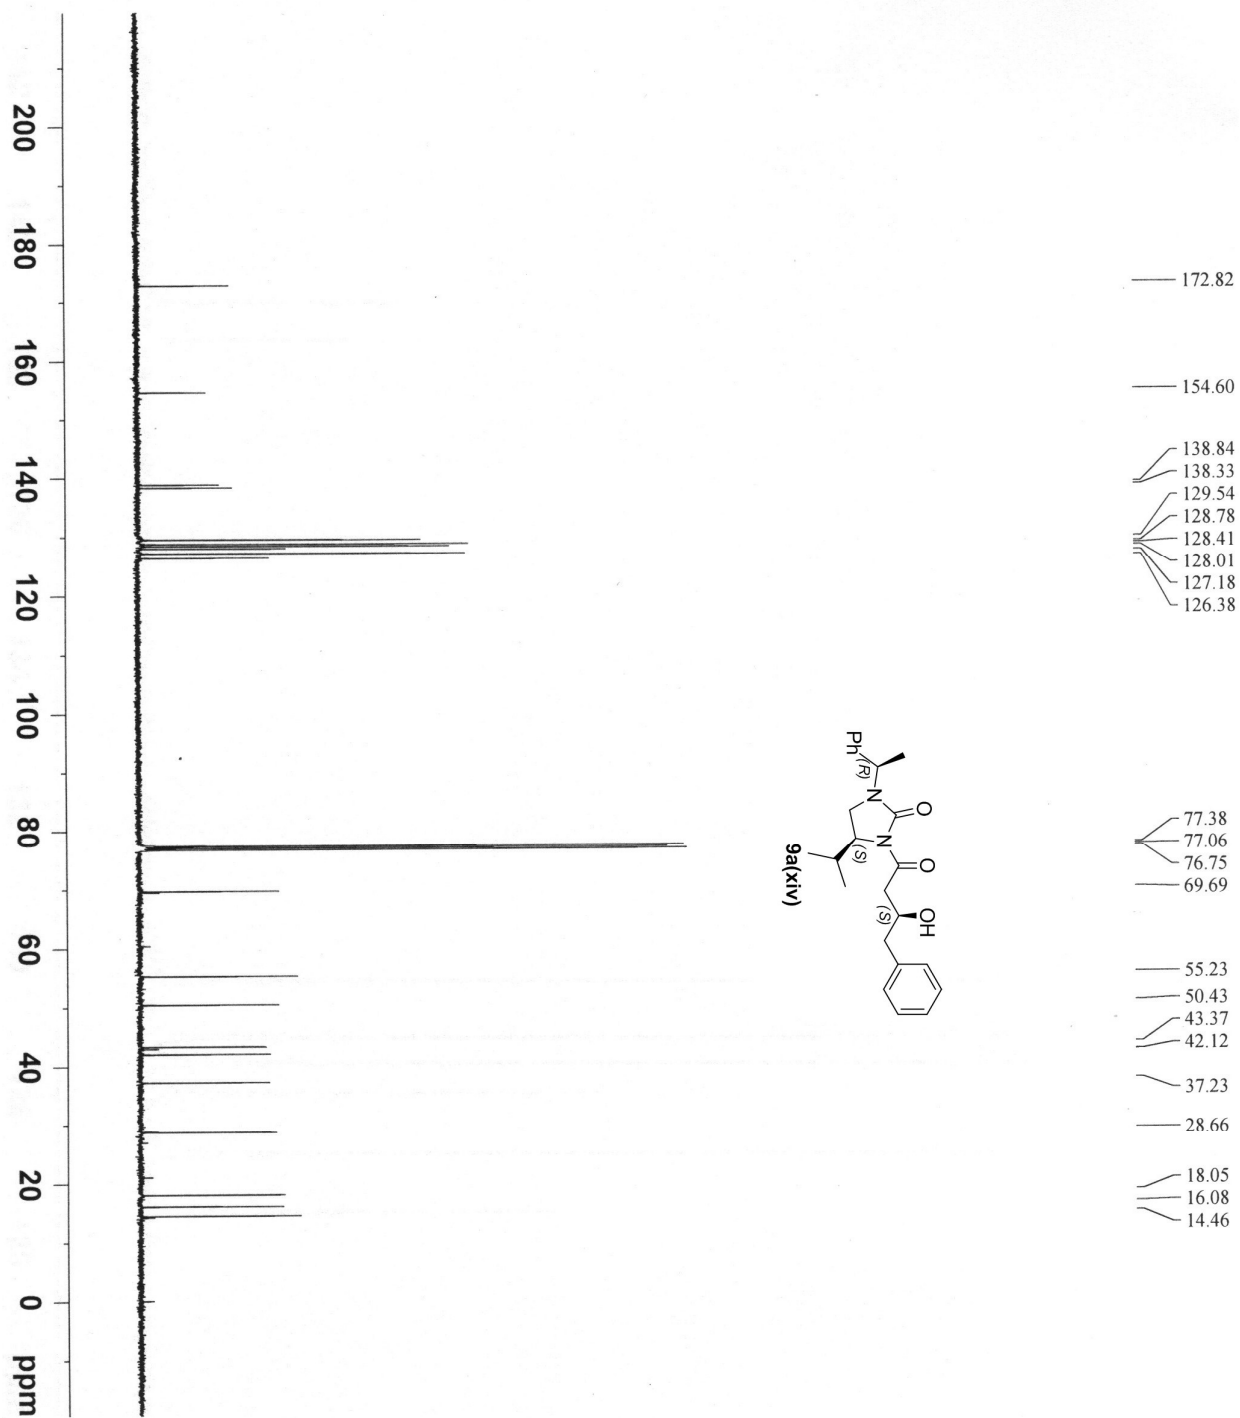

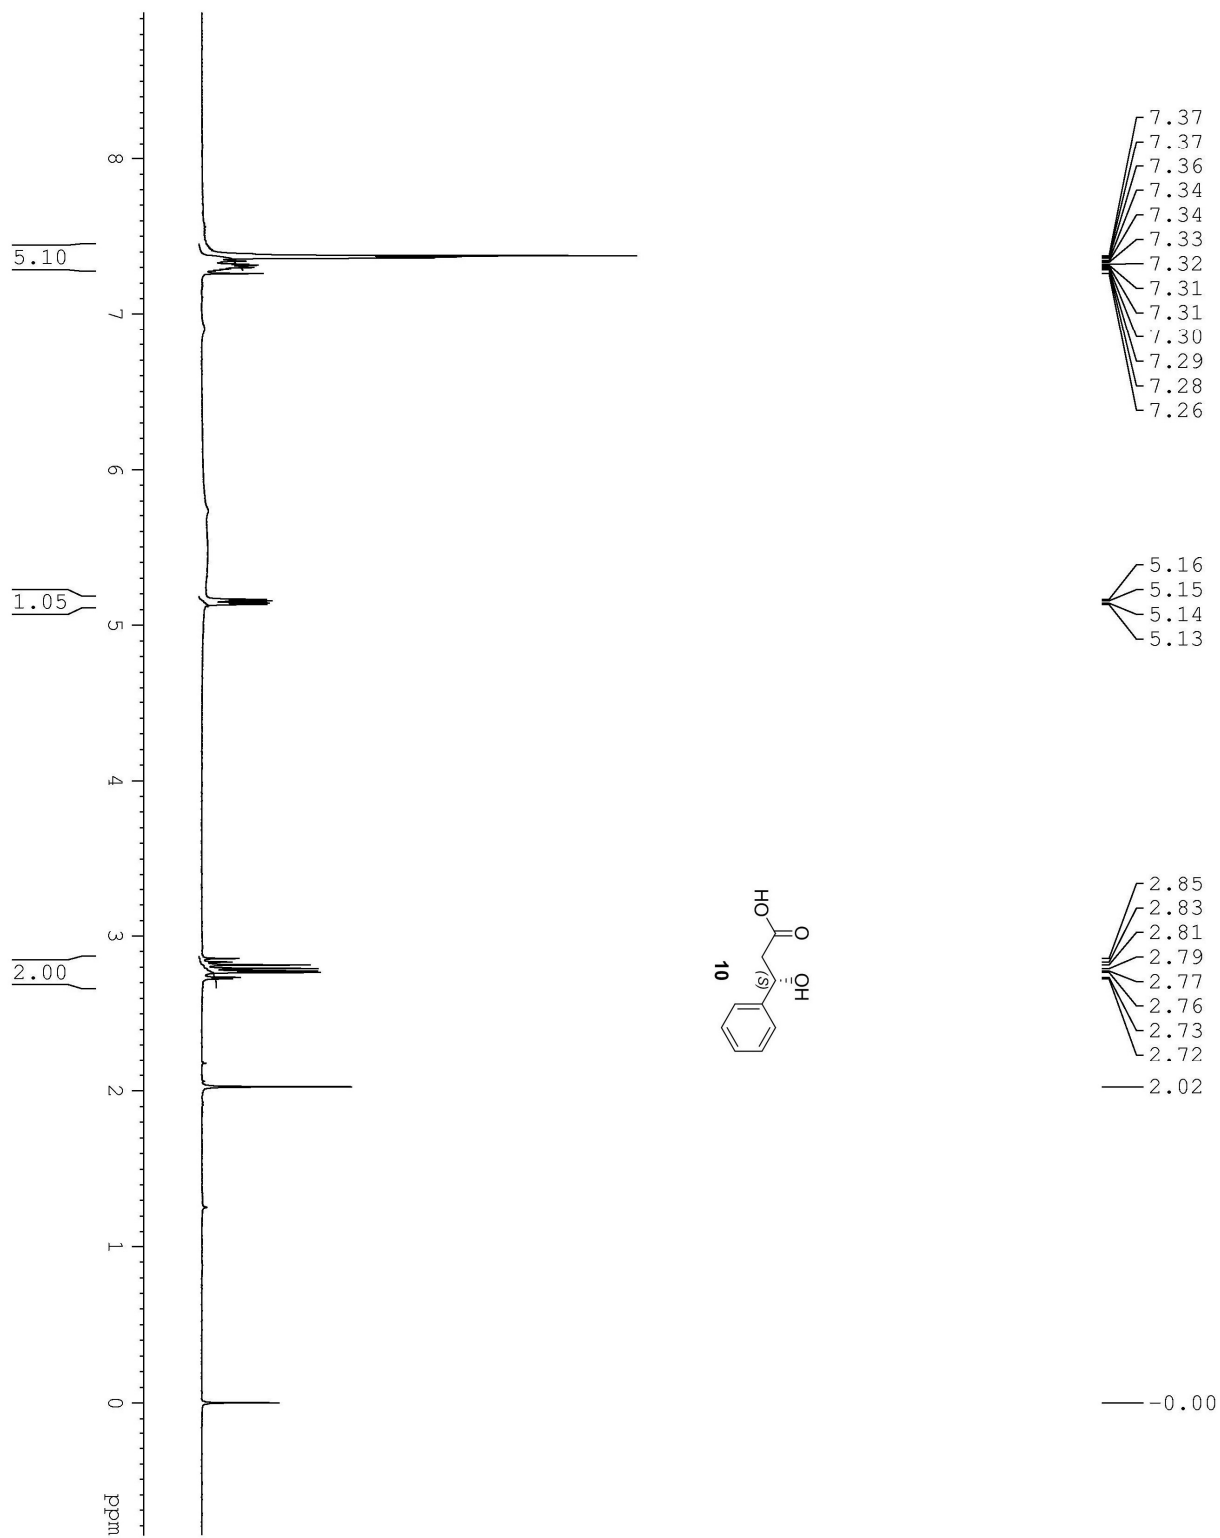

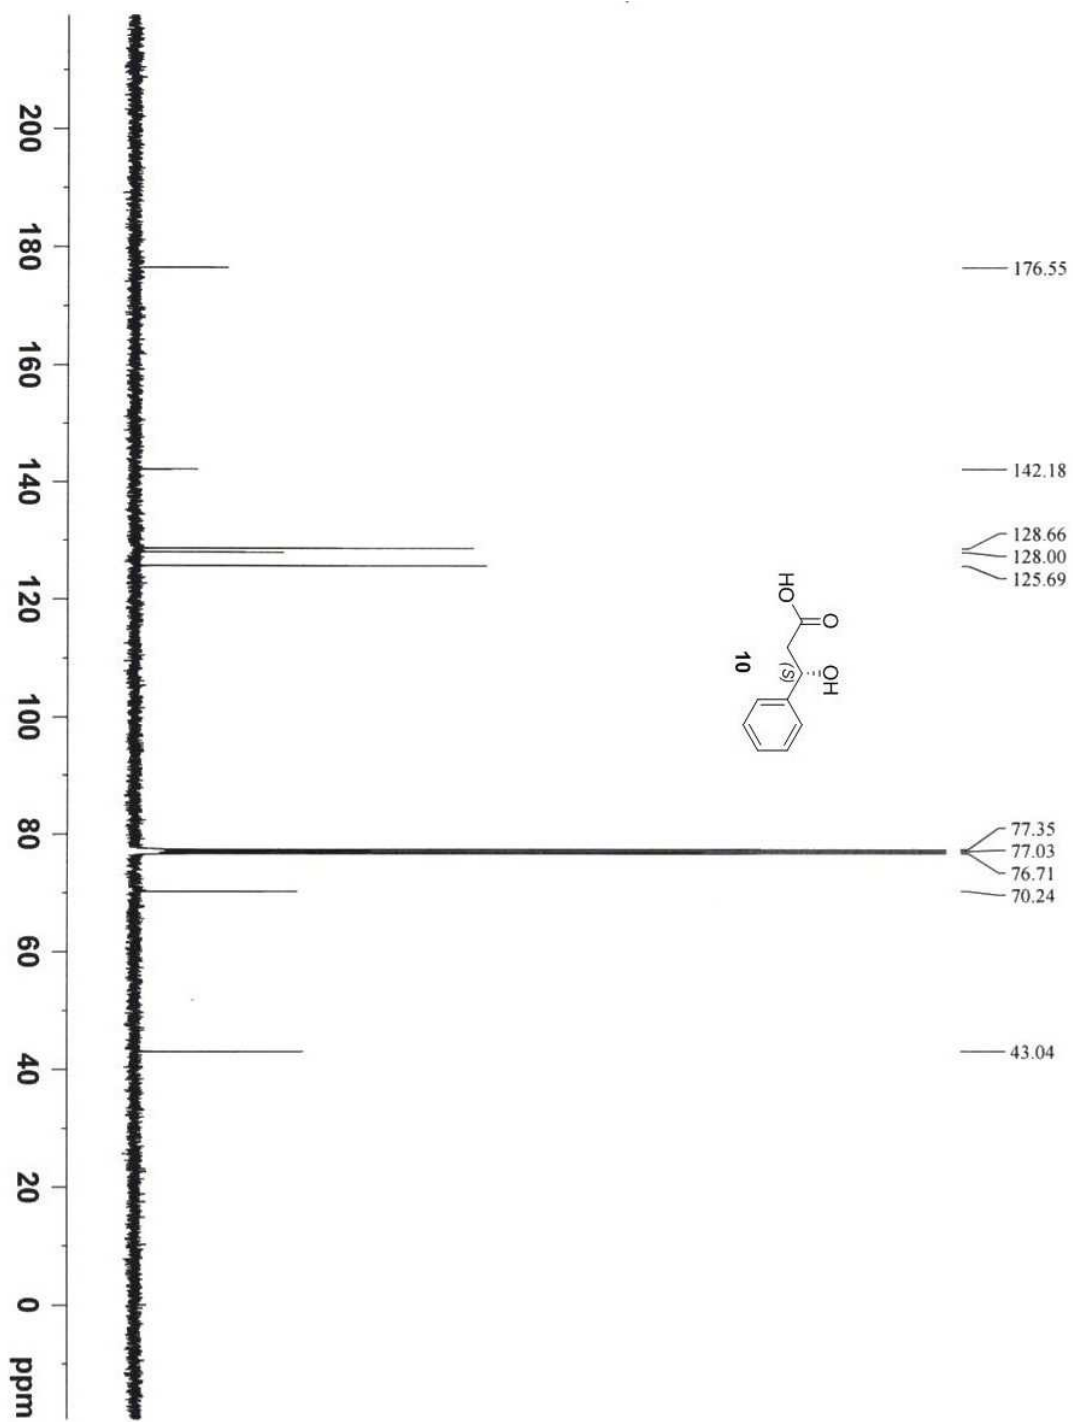

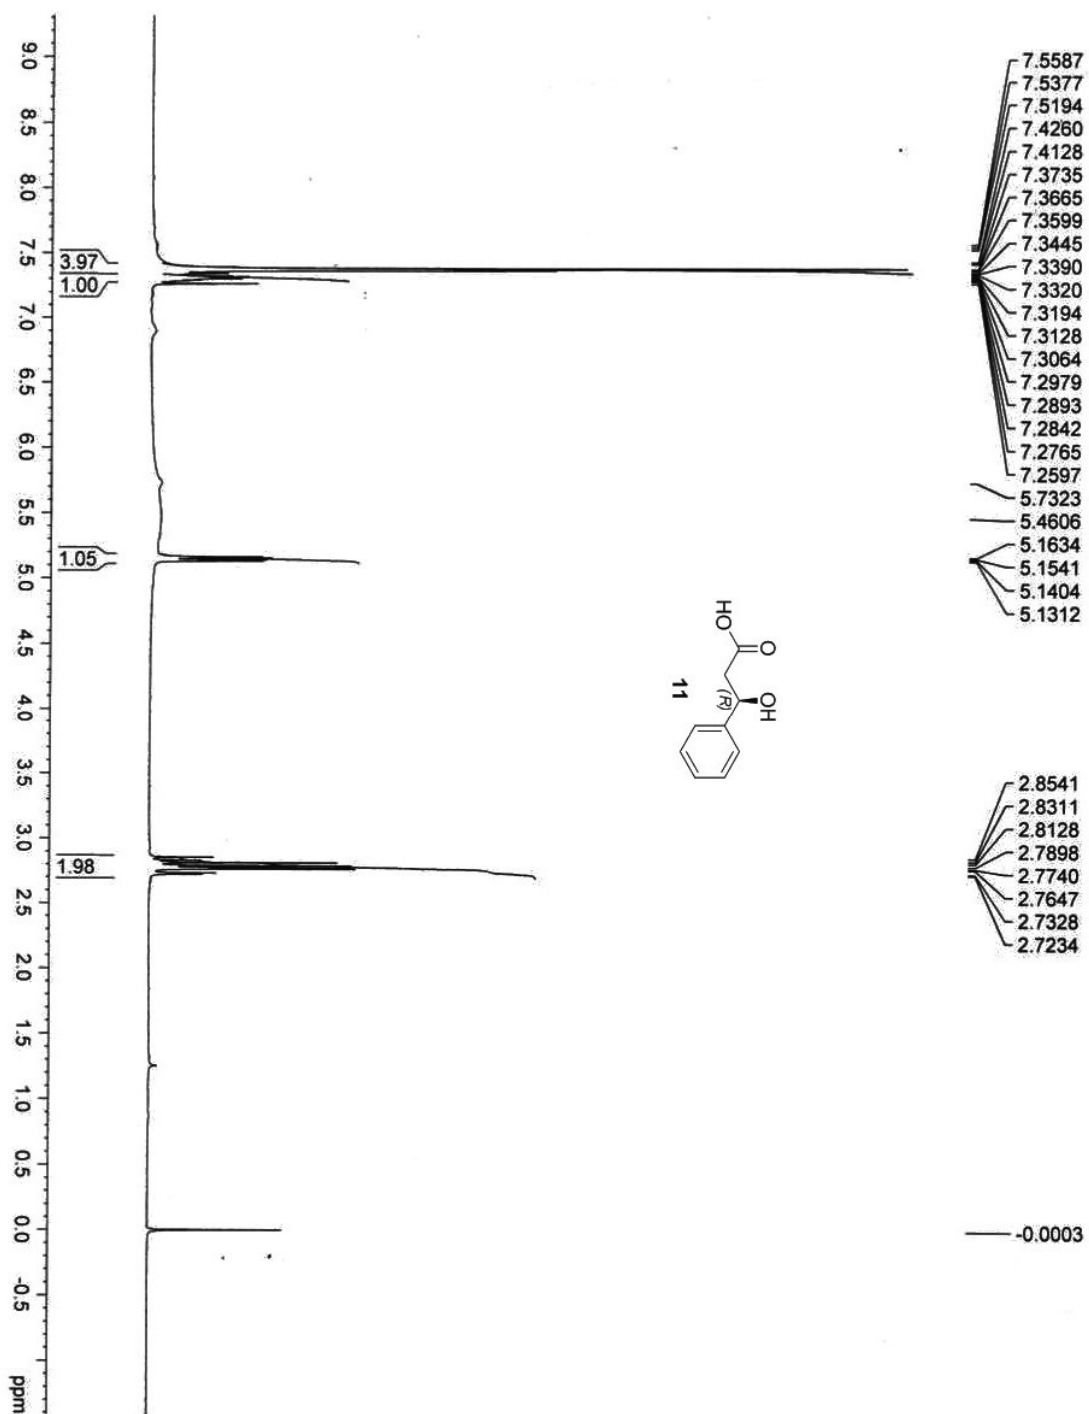

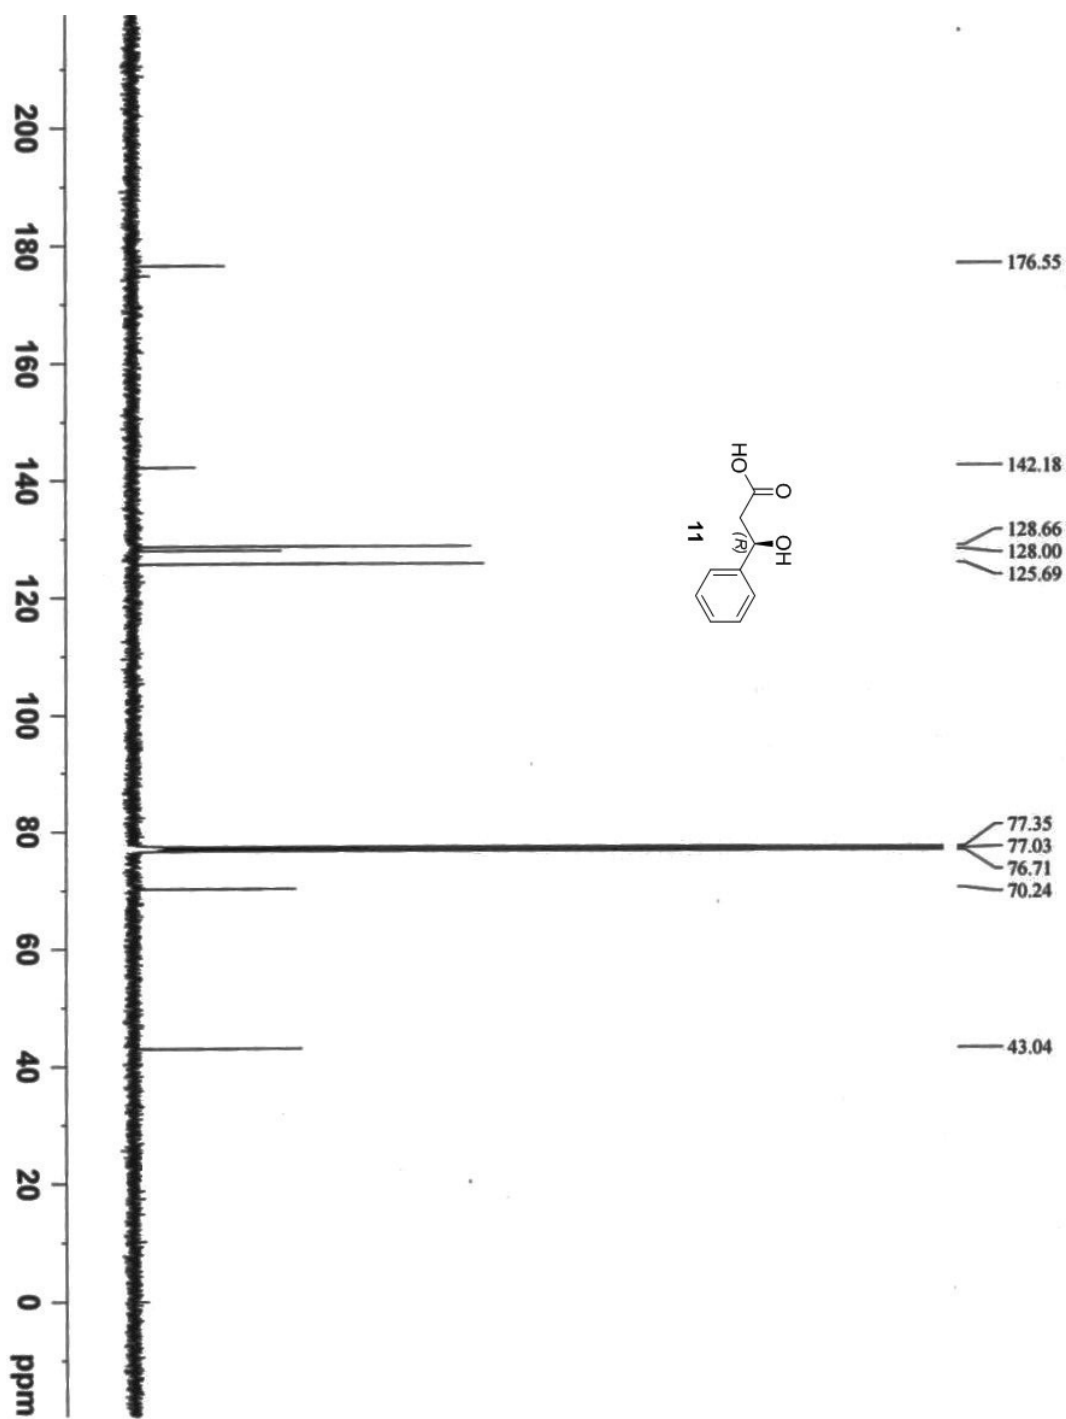

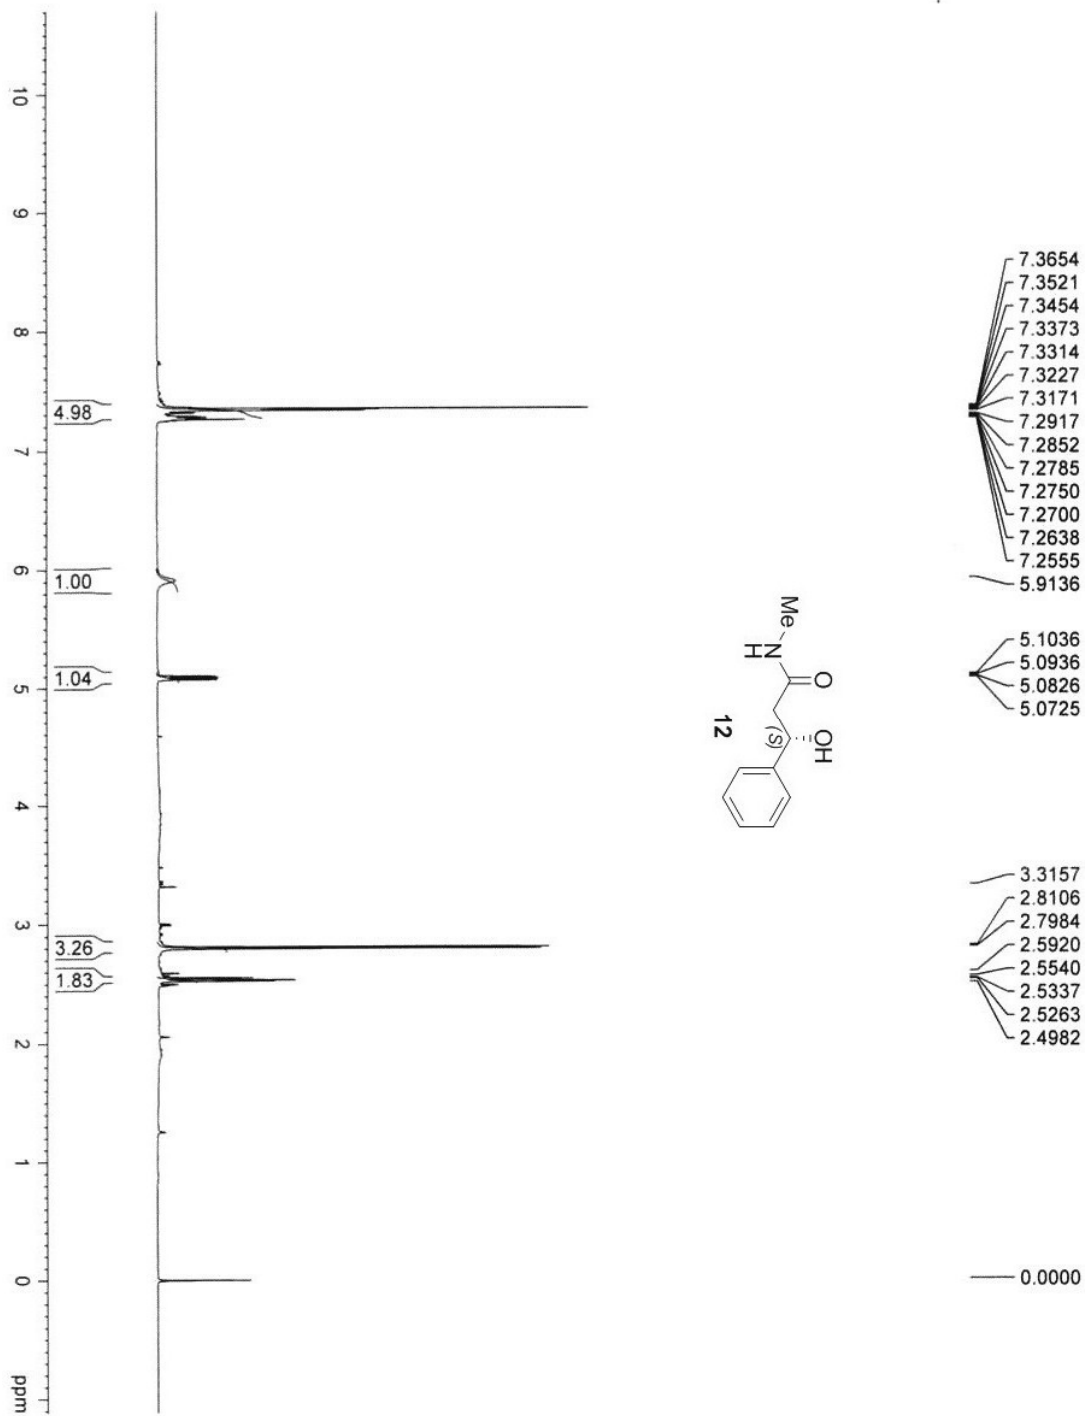



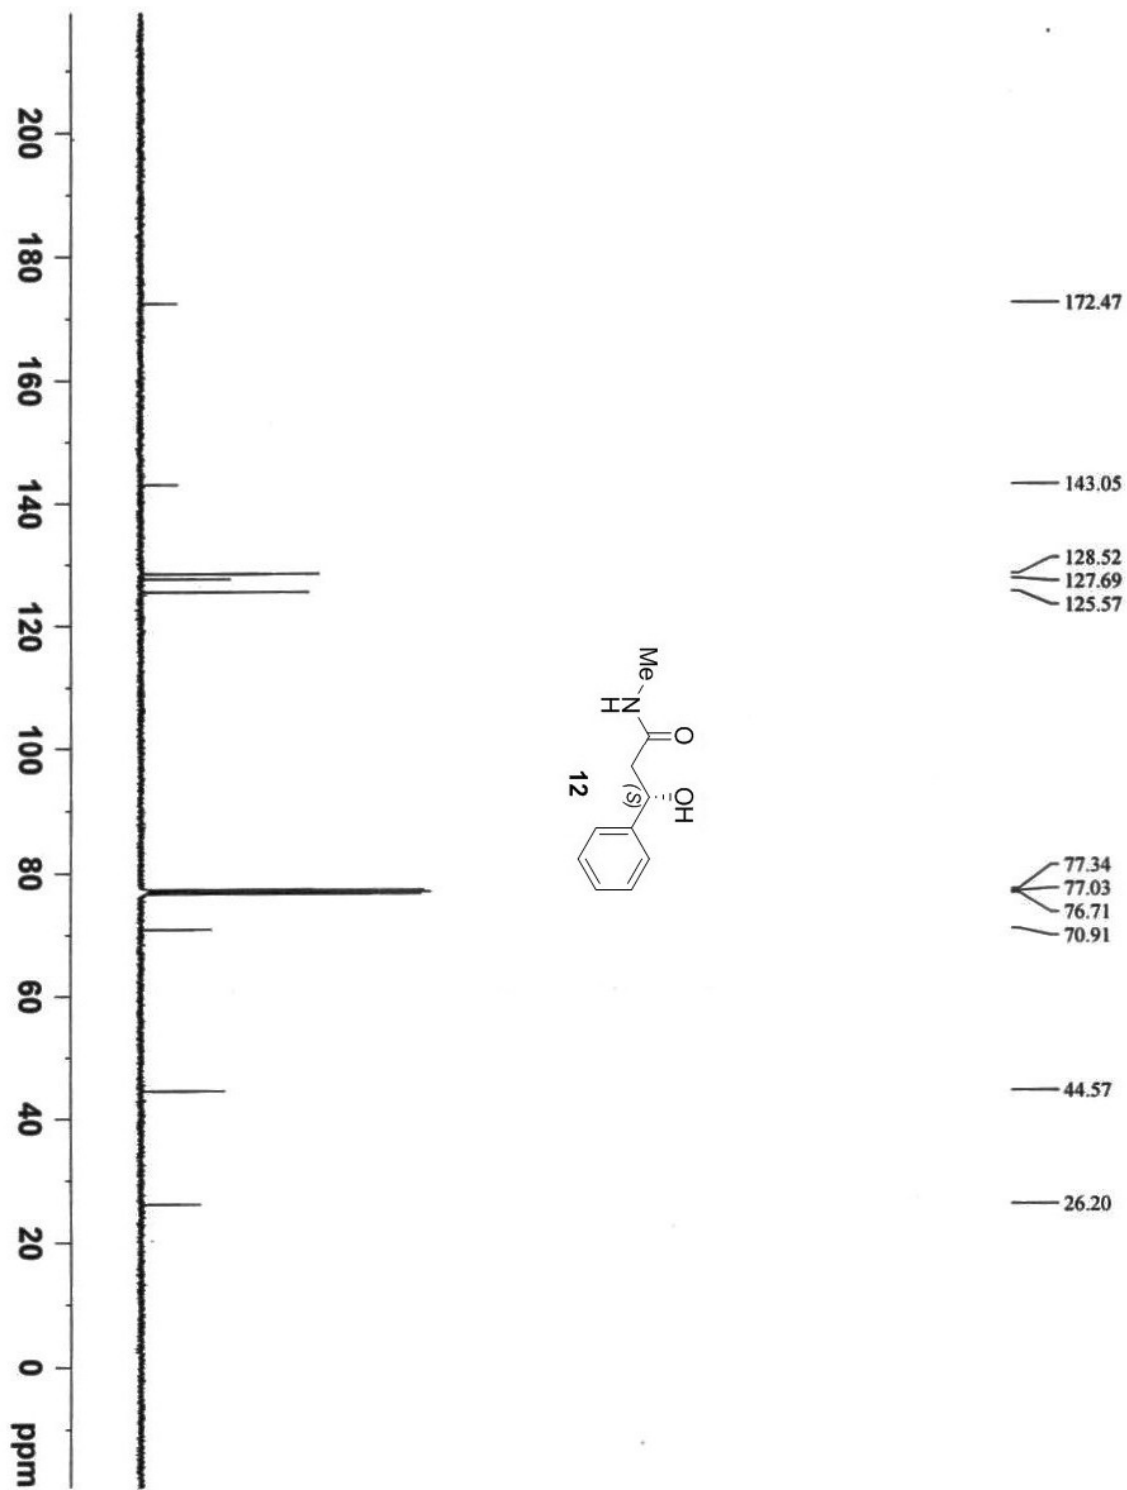

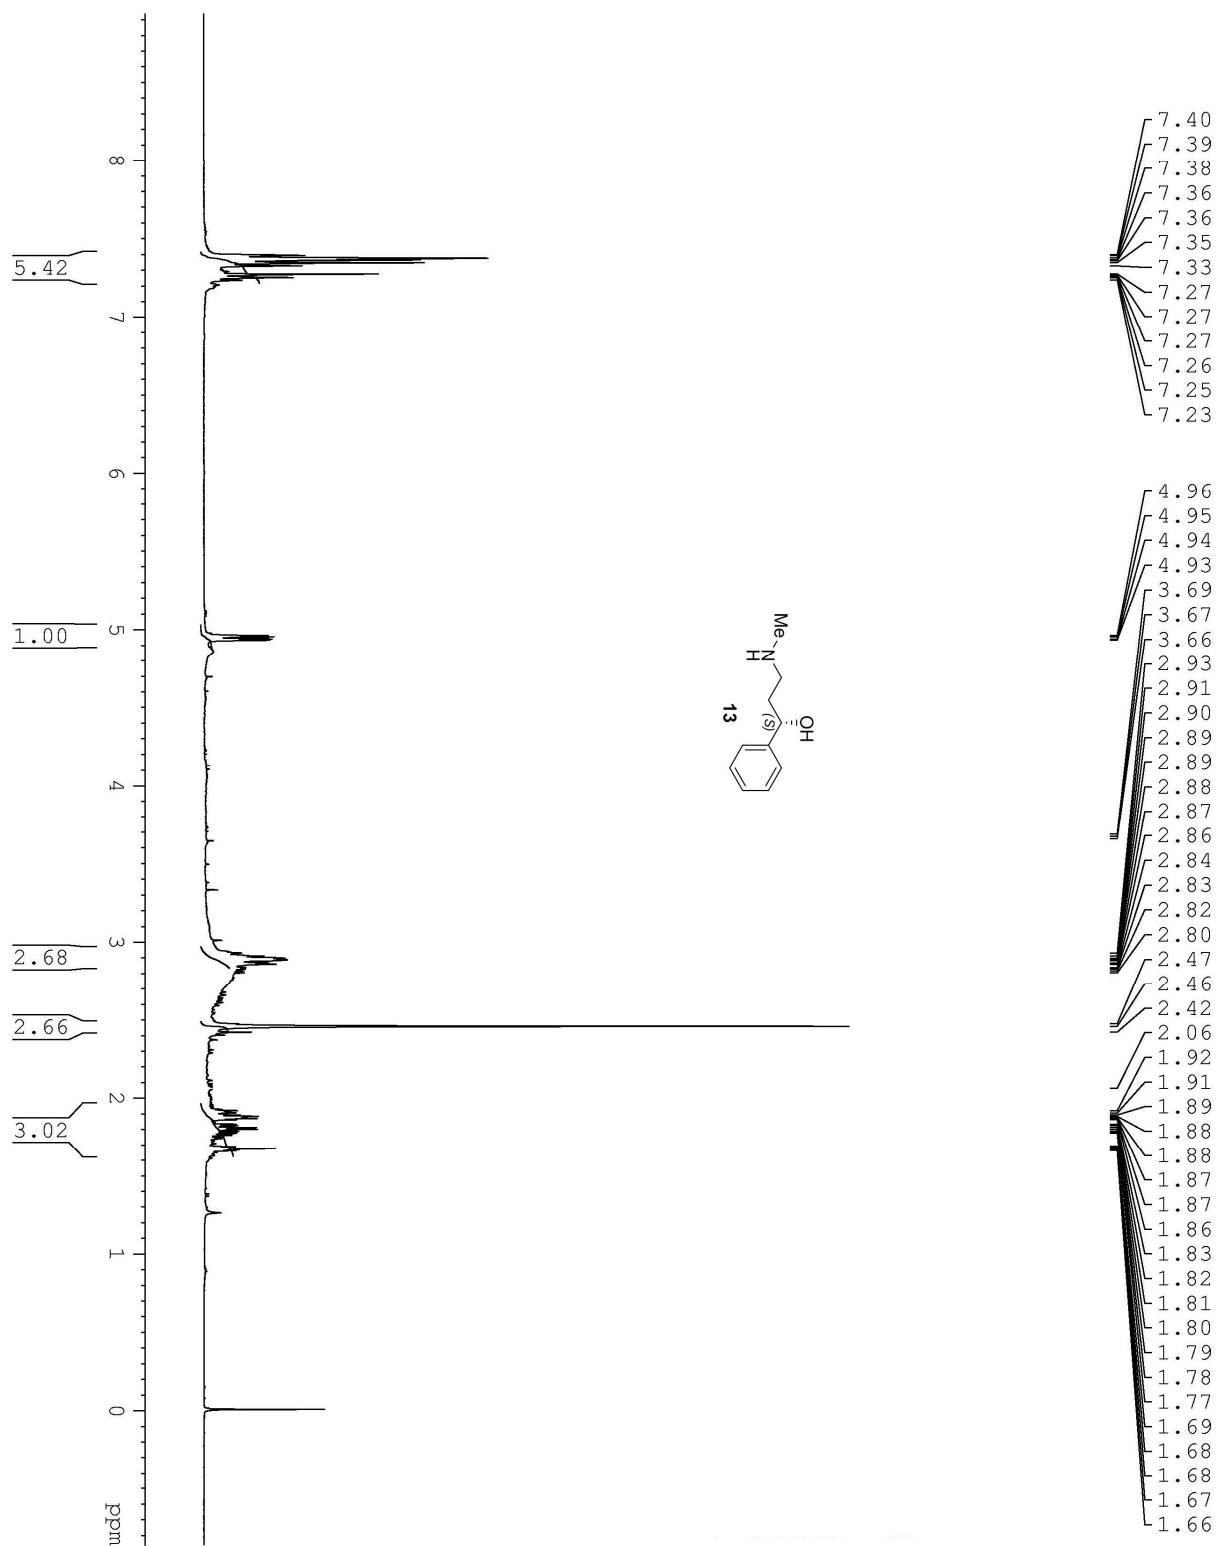

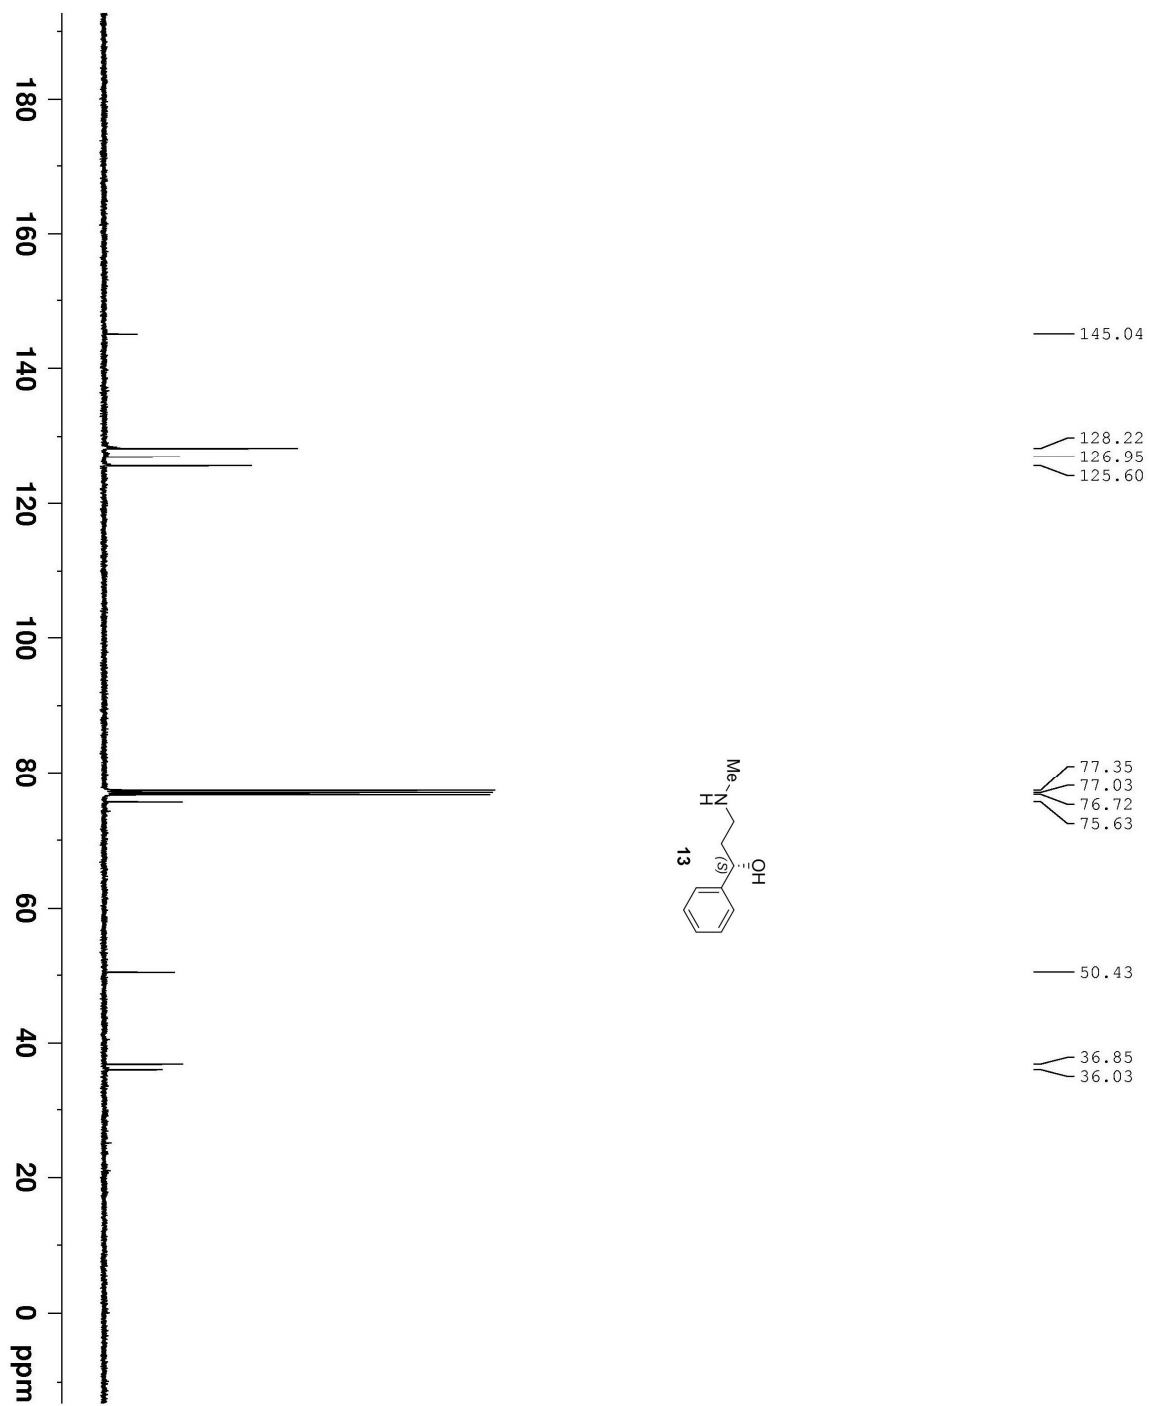

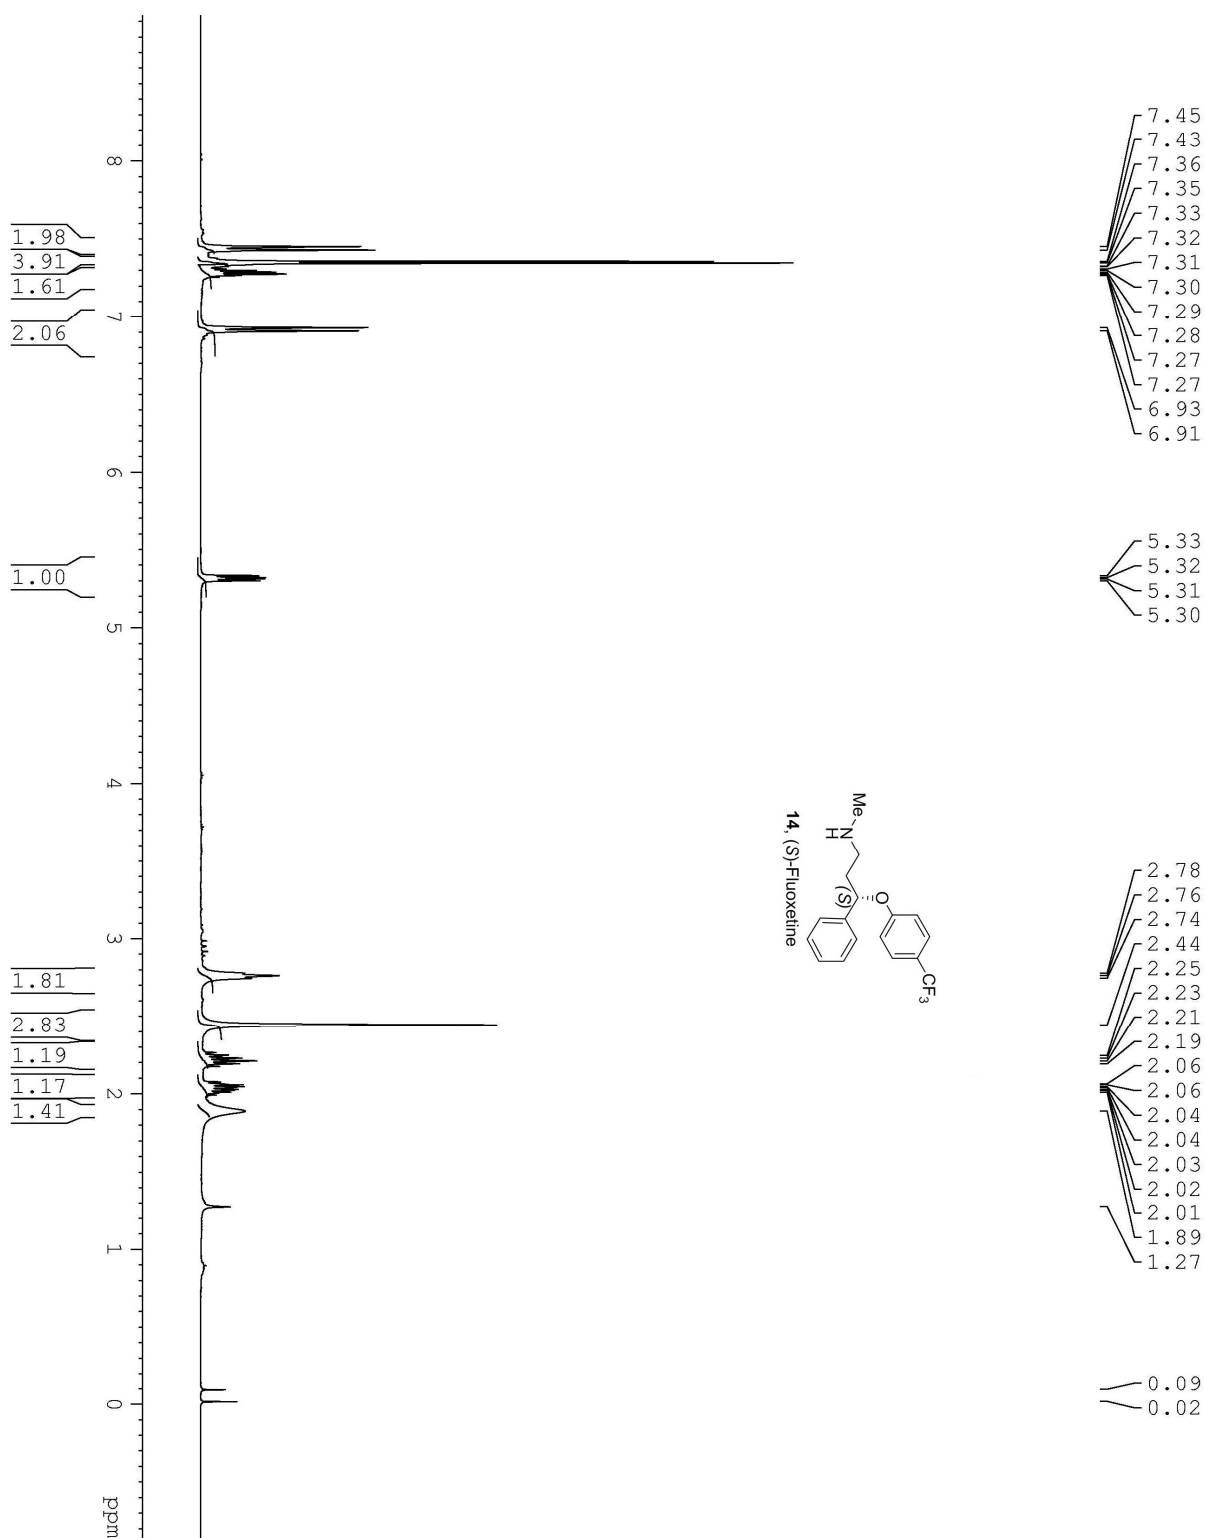

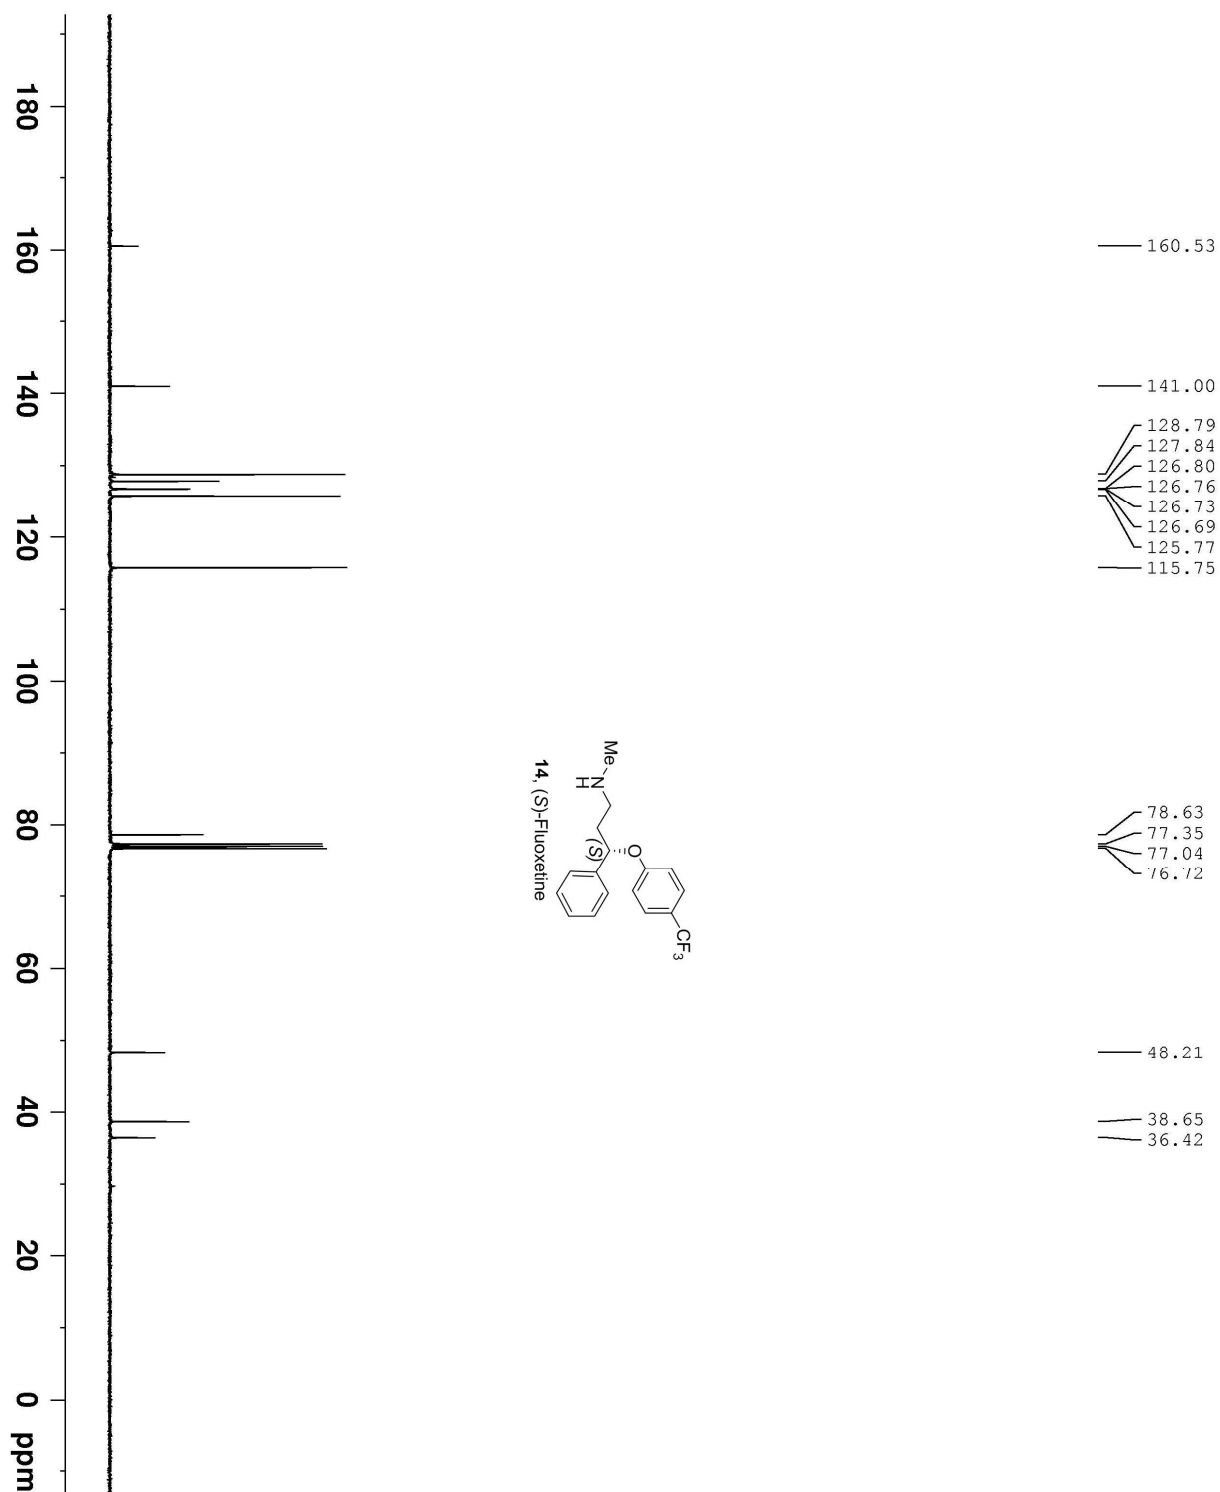

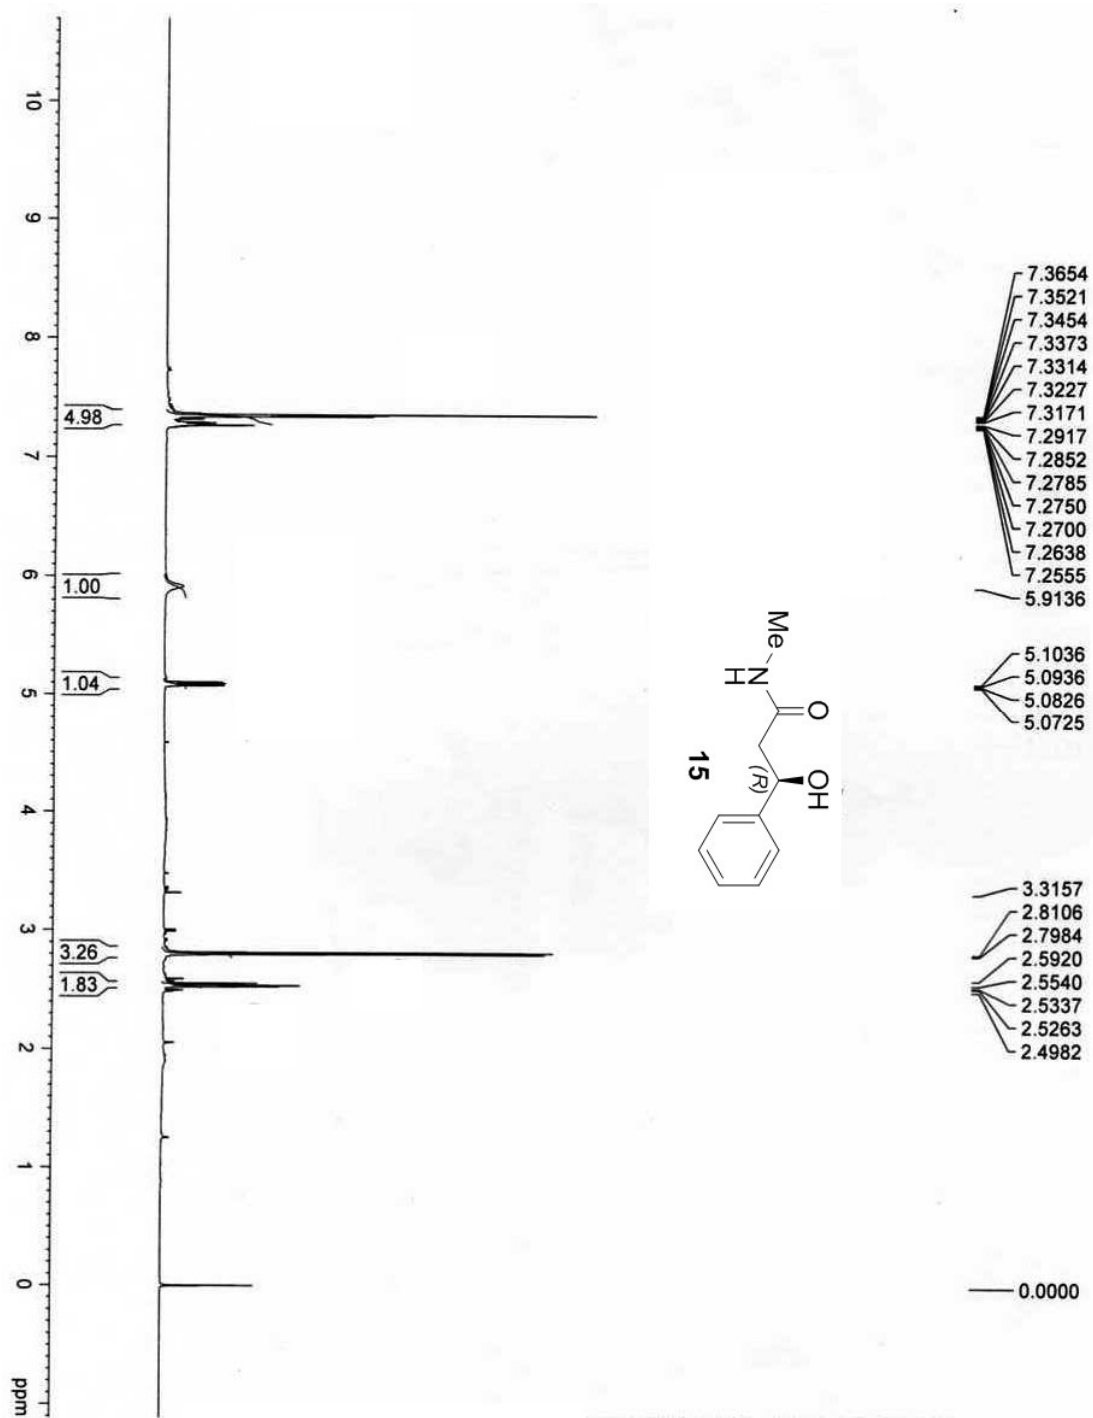

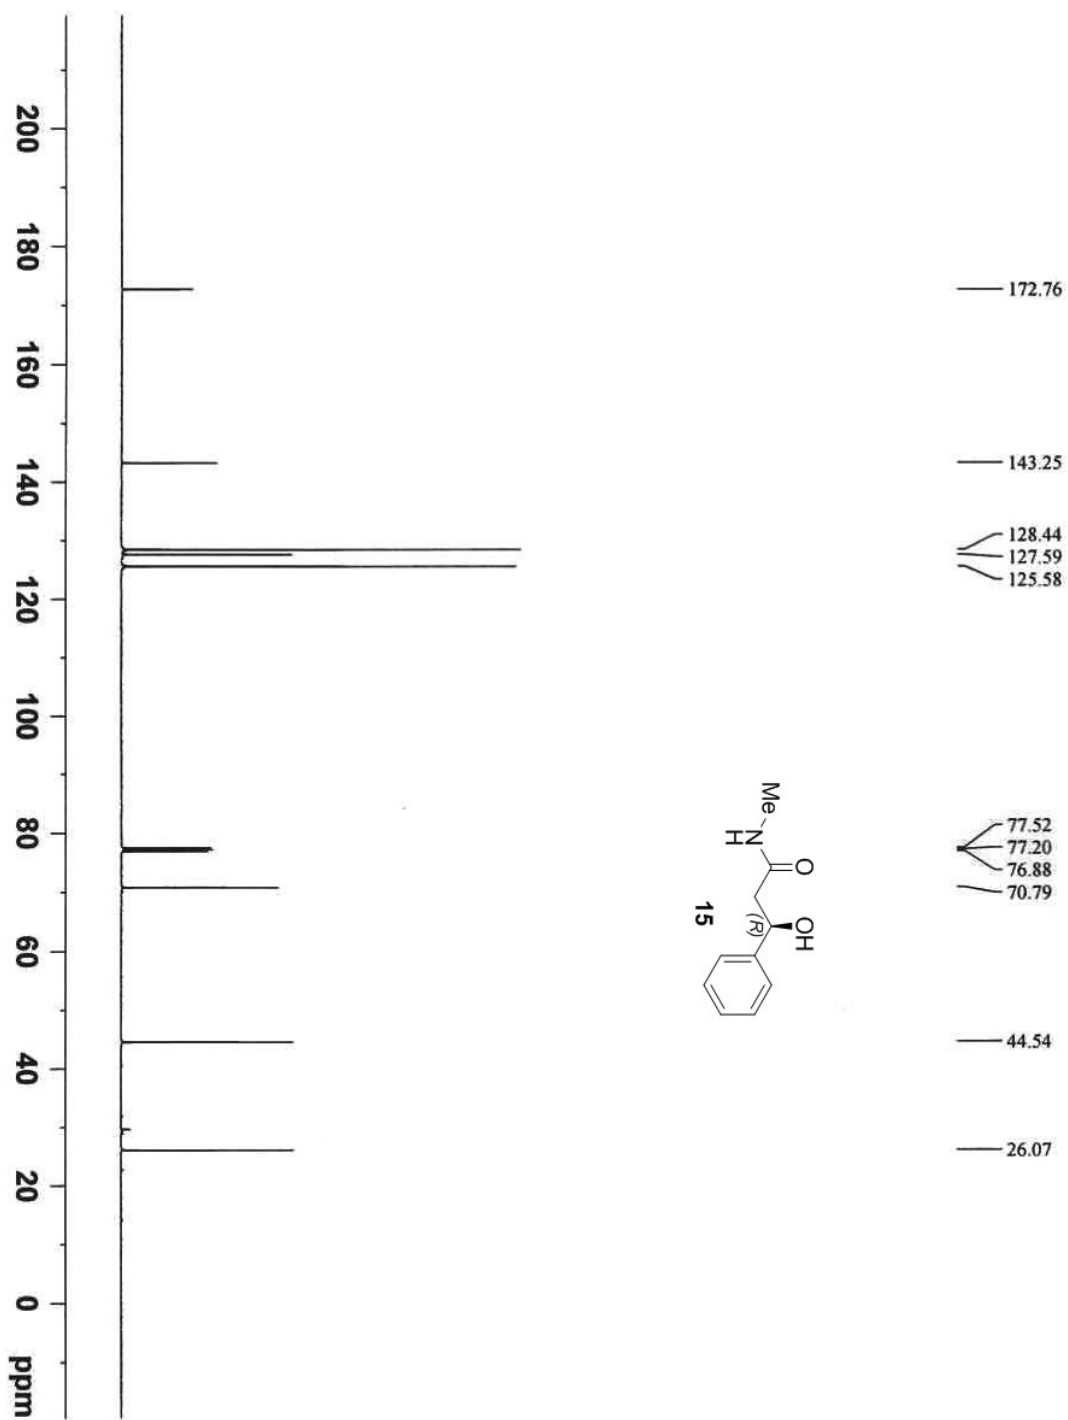

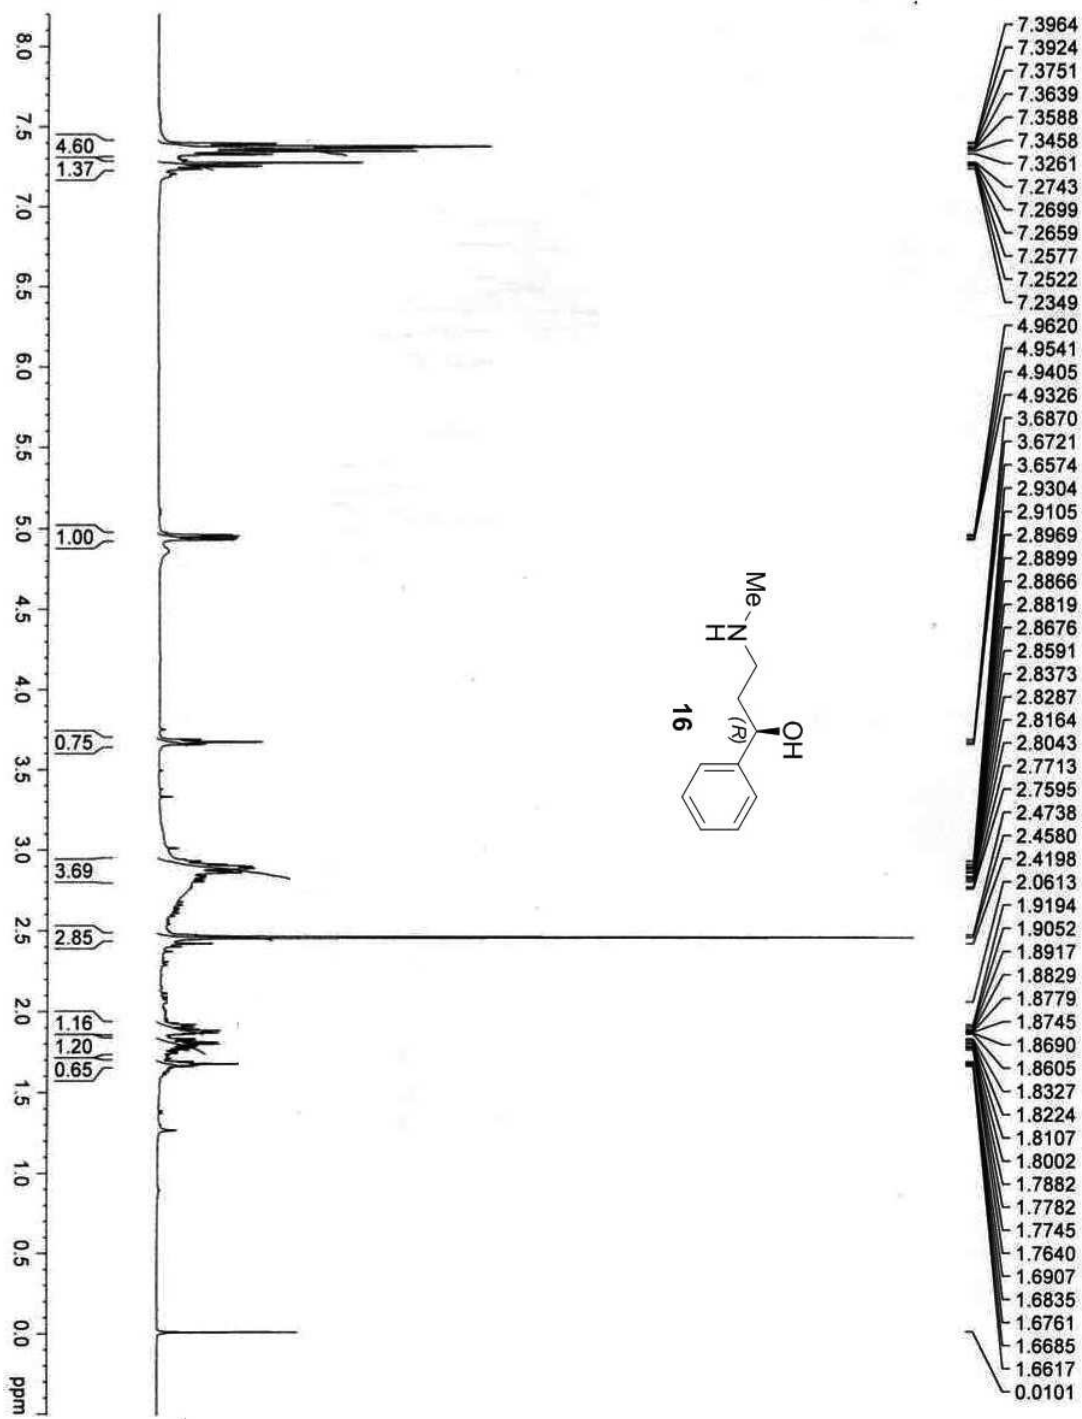



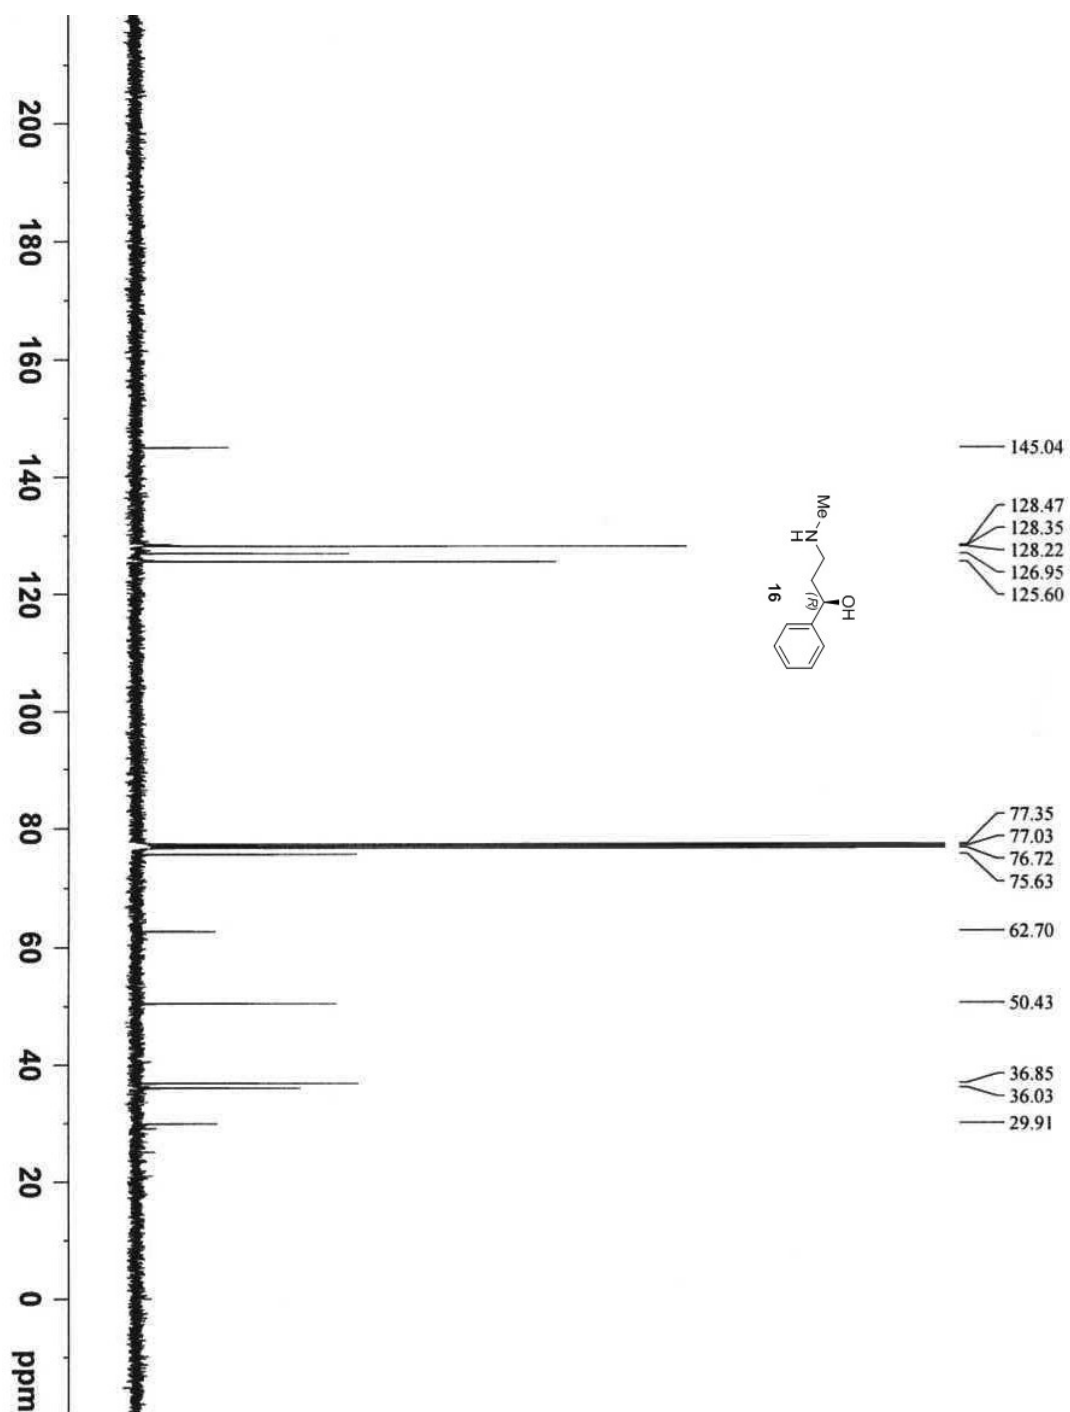

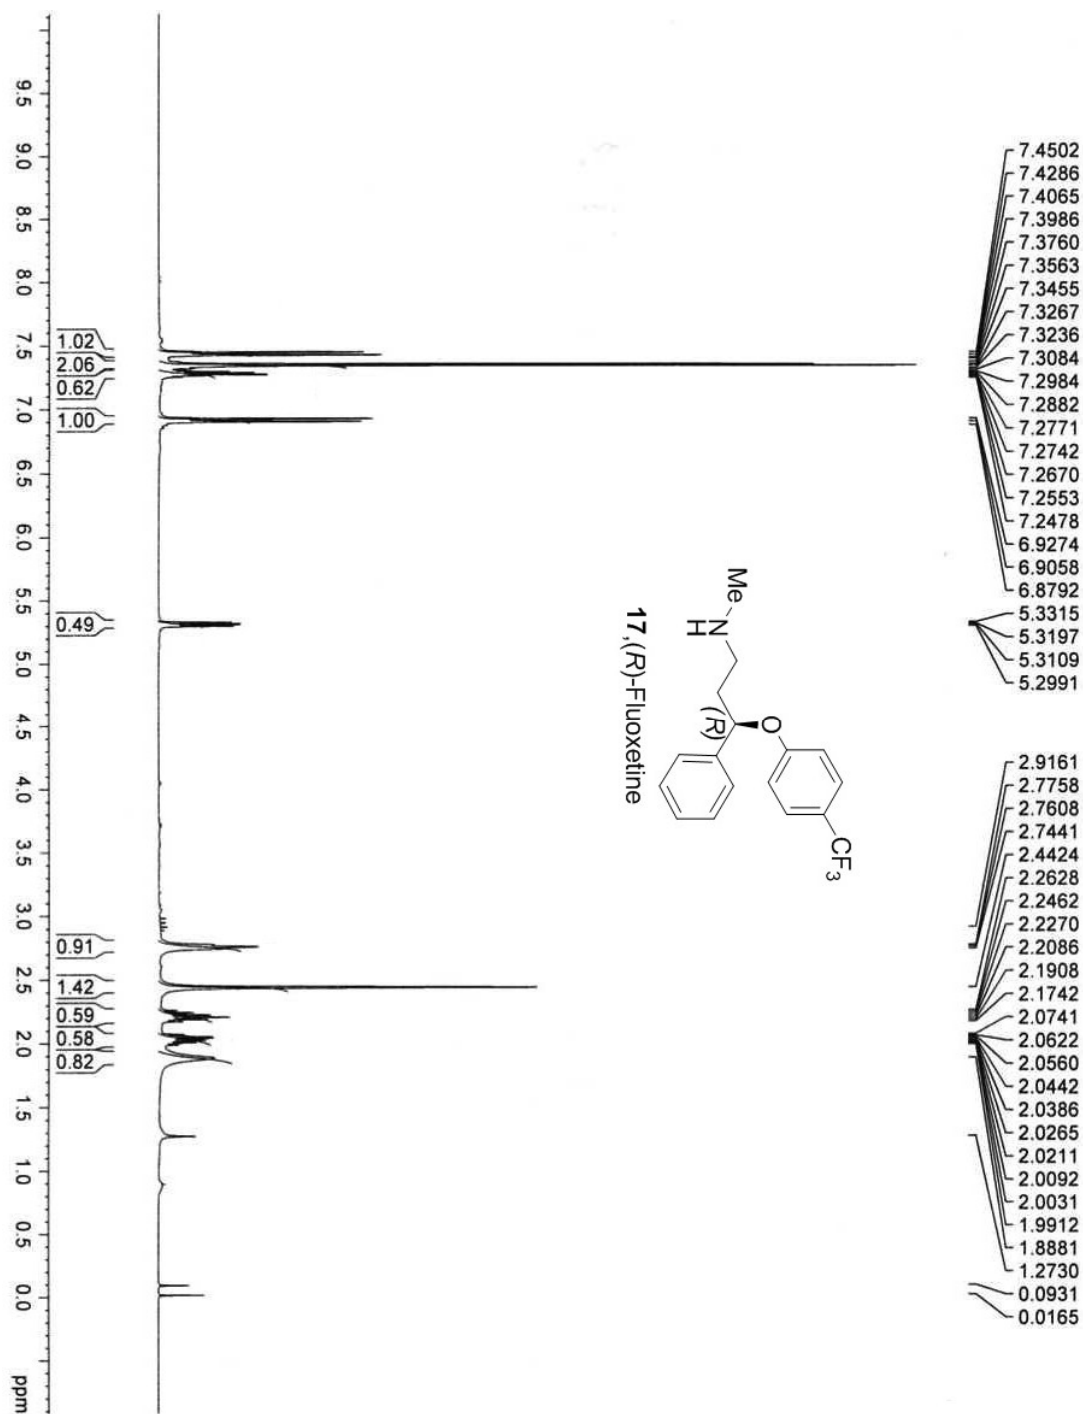

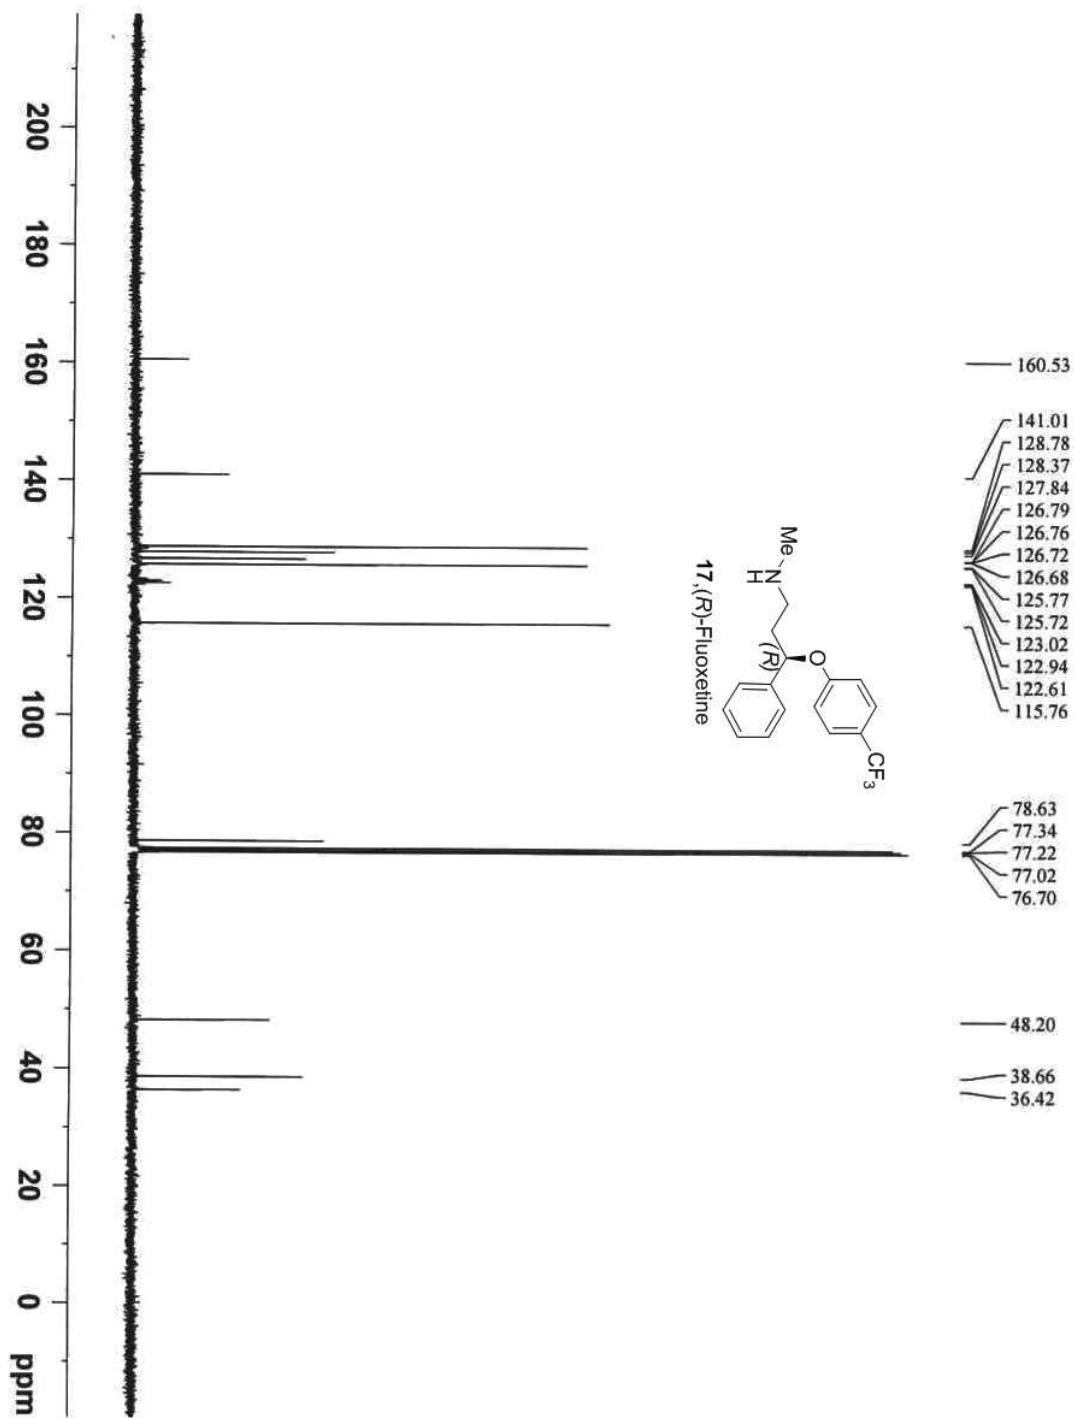

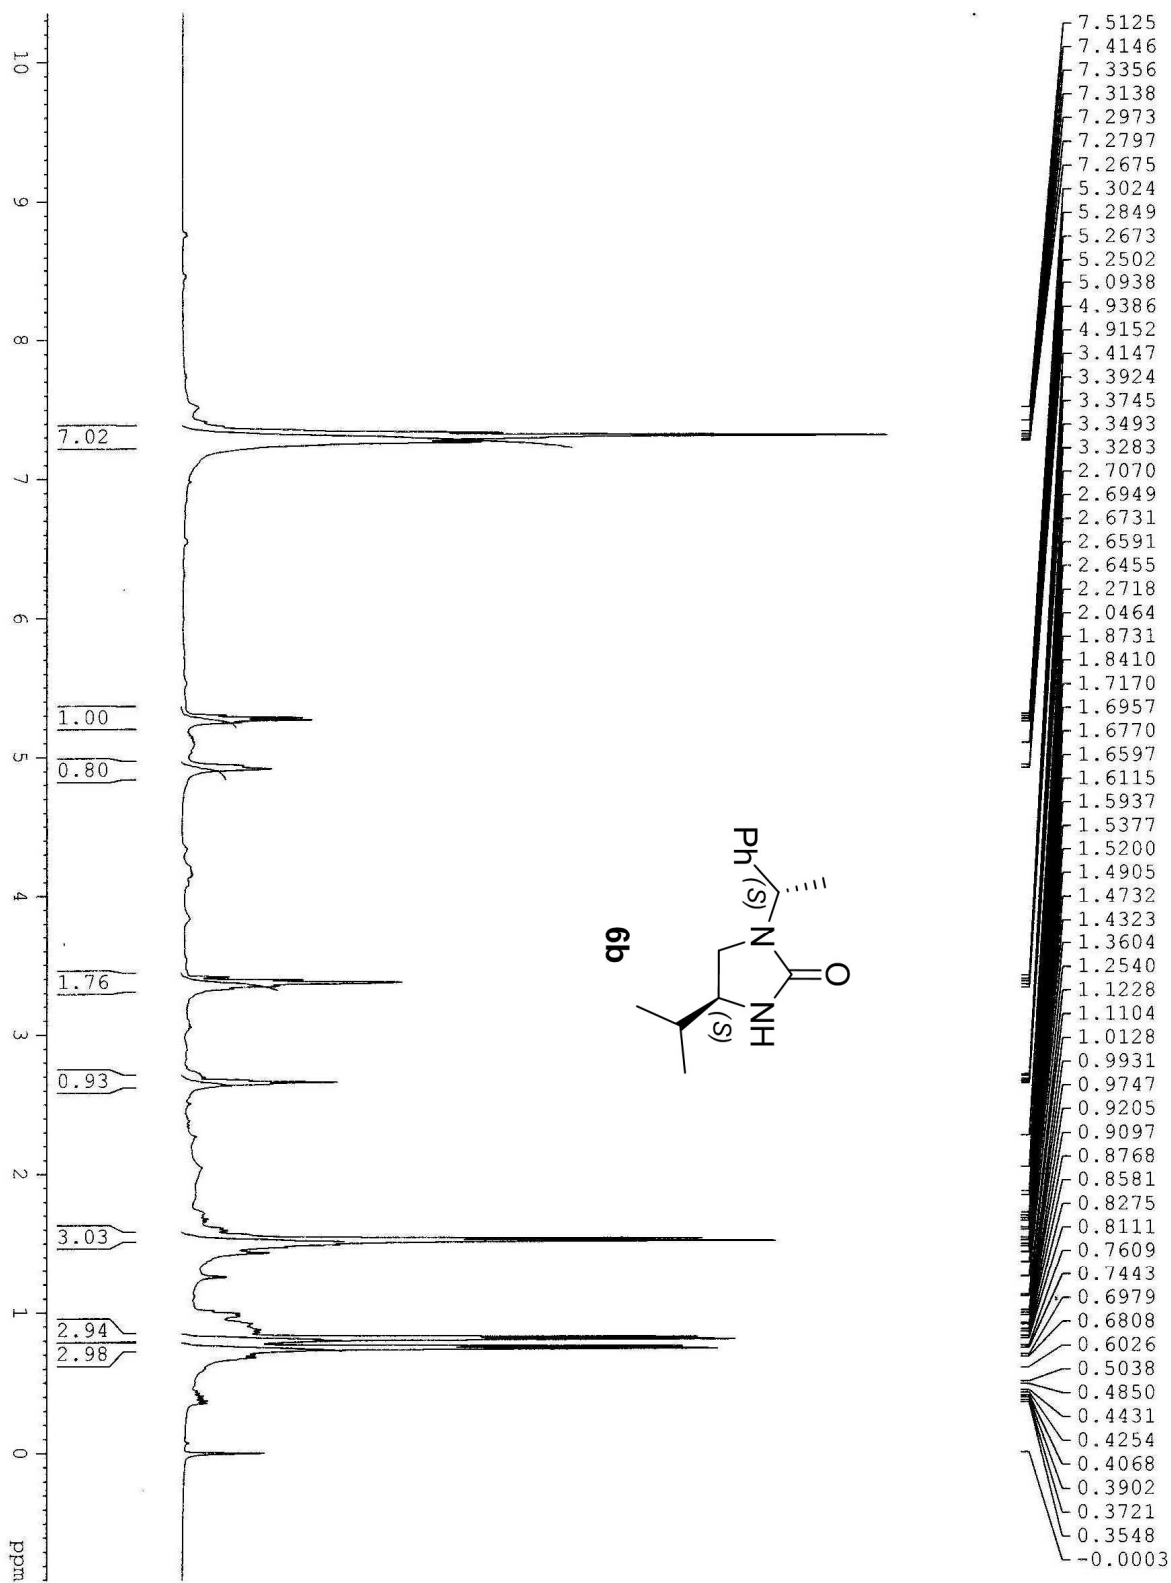

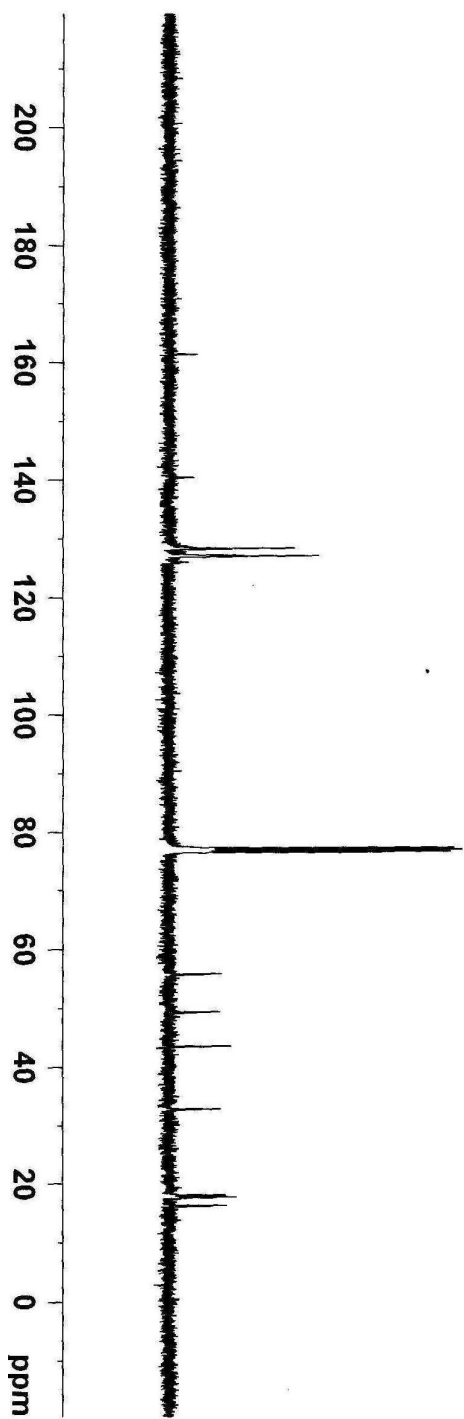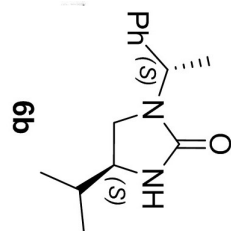

161.4

140.4

128.4

128.2

127.3

127.1

127.0

77.36

77.23

77.05

76.91

76.73

76.55

55.85

49.44

43.64

32.95

18.13

18.00

17.83

17.68

16.35

16.15

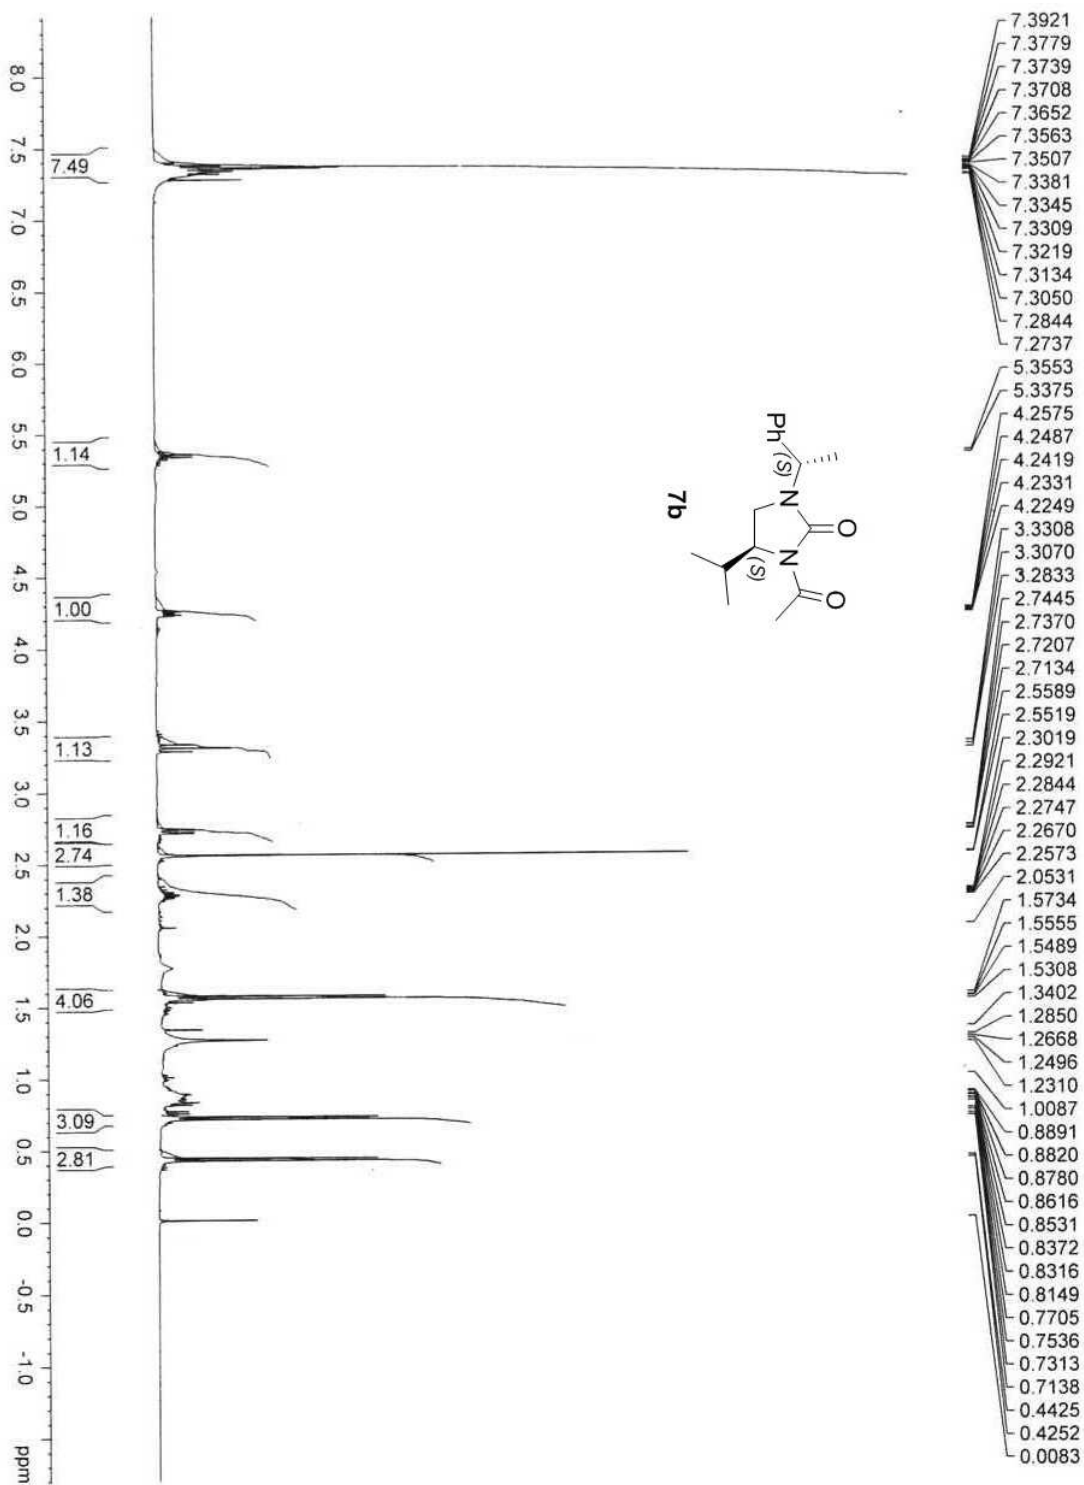

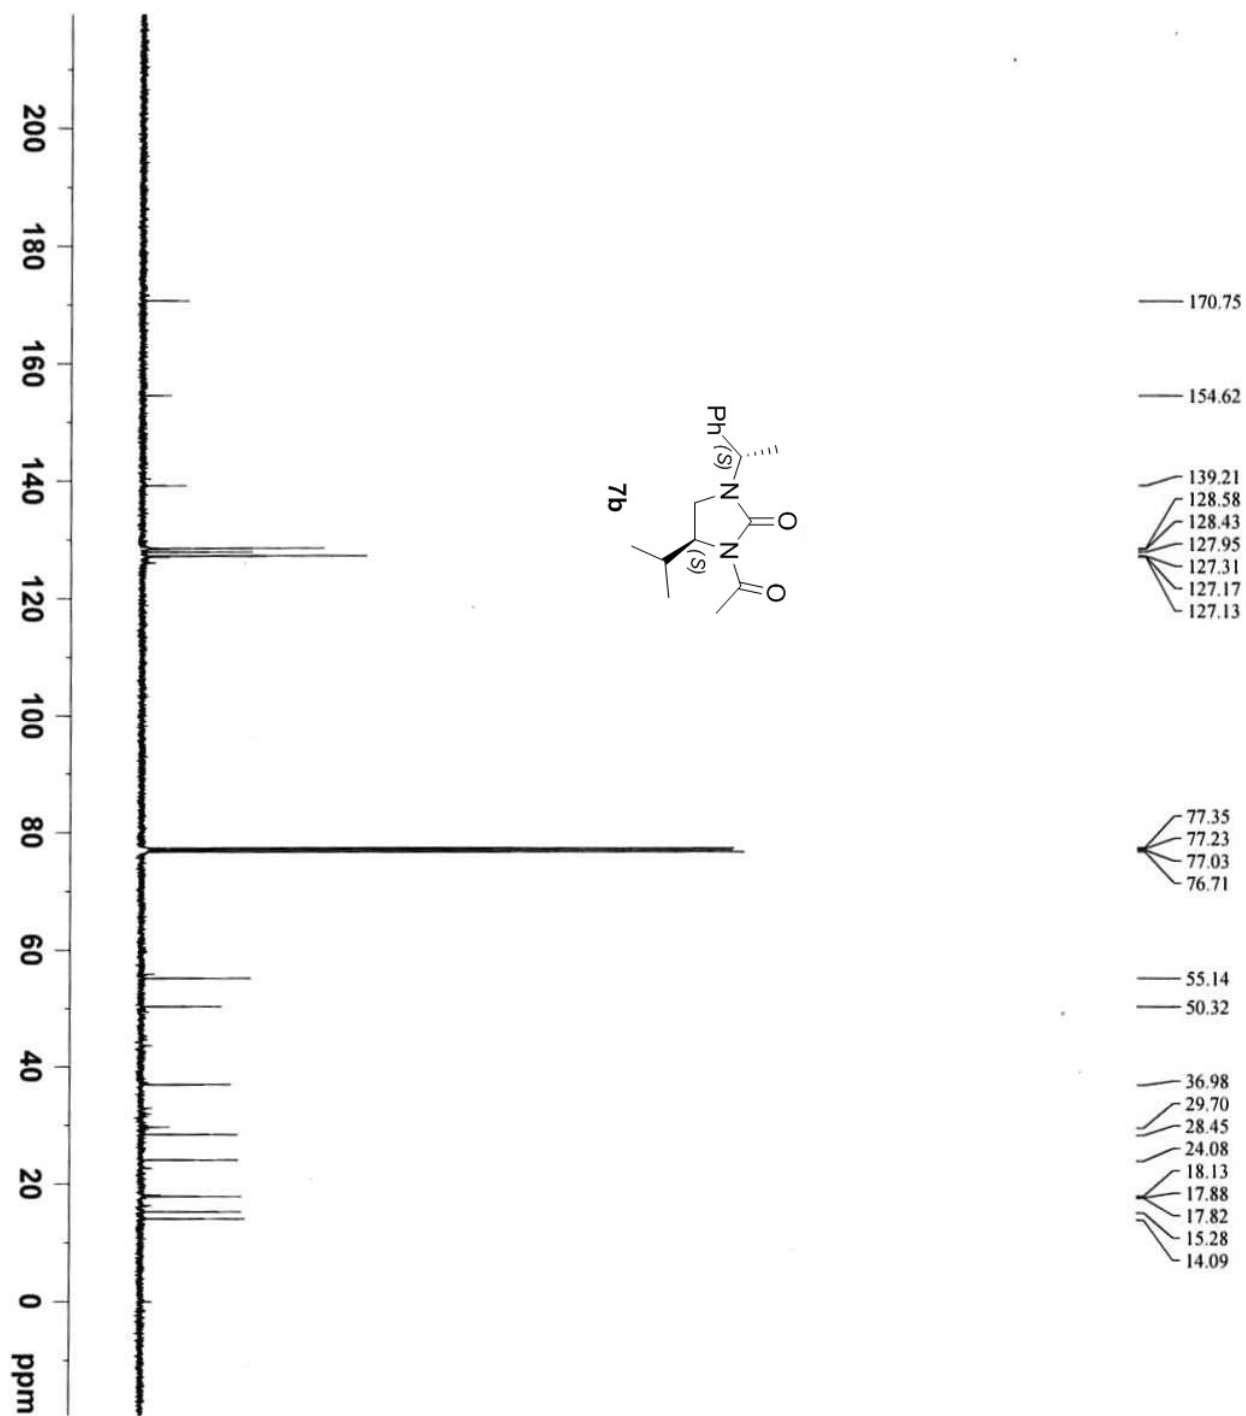

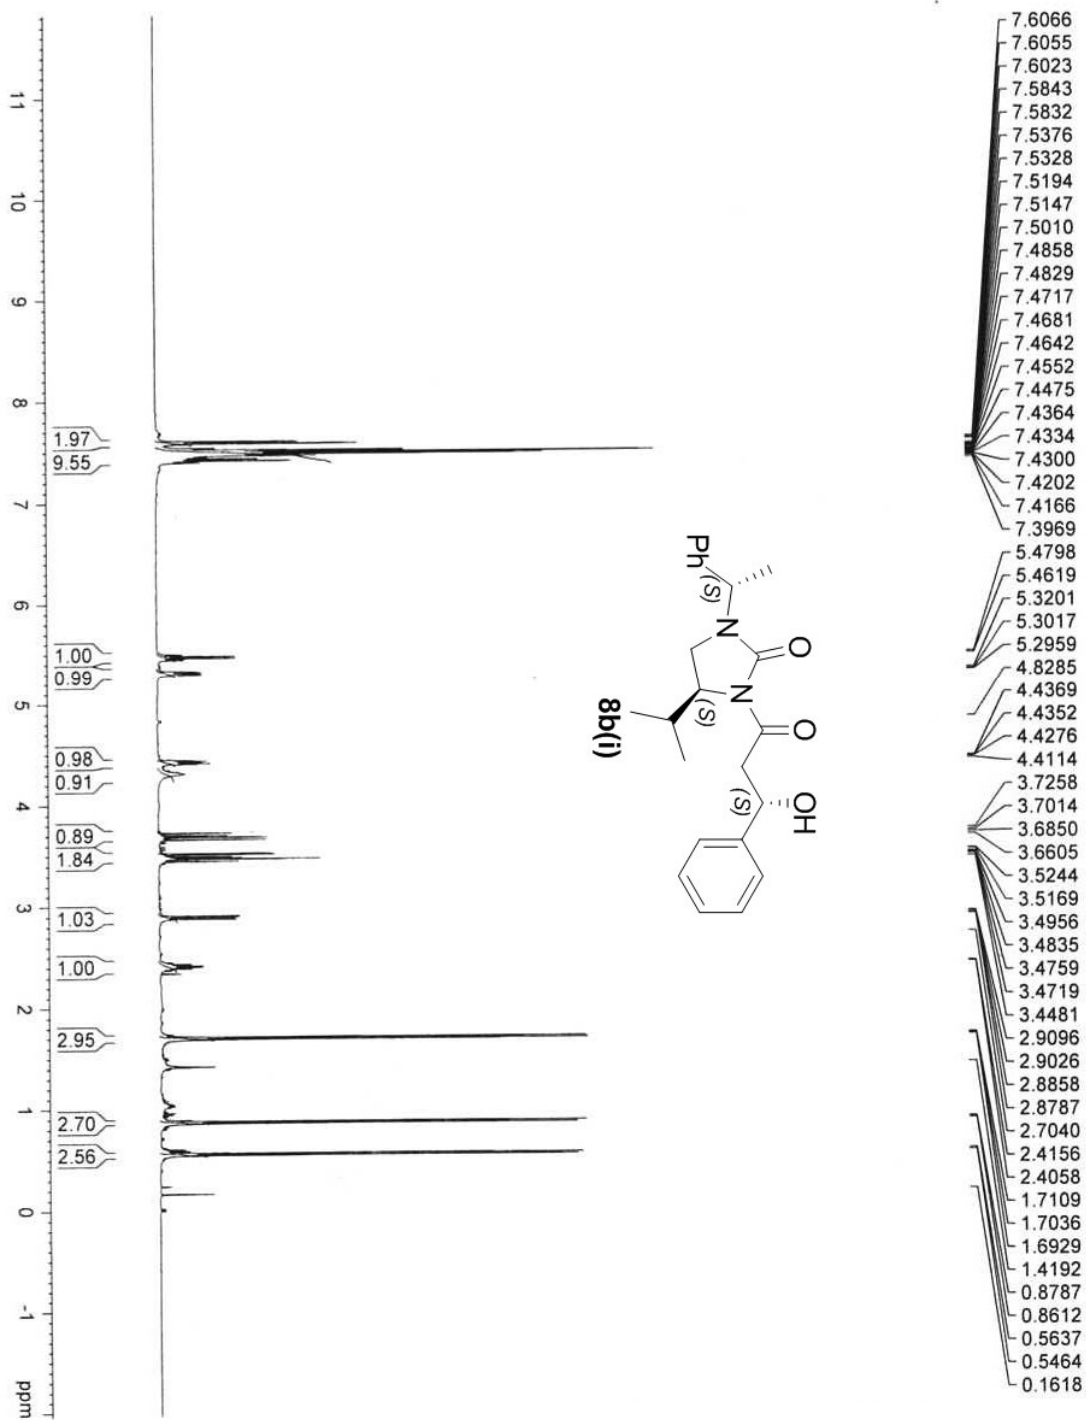



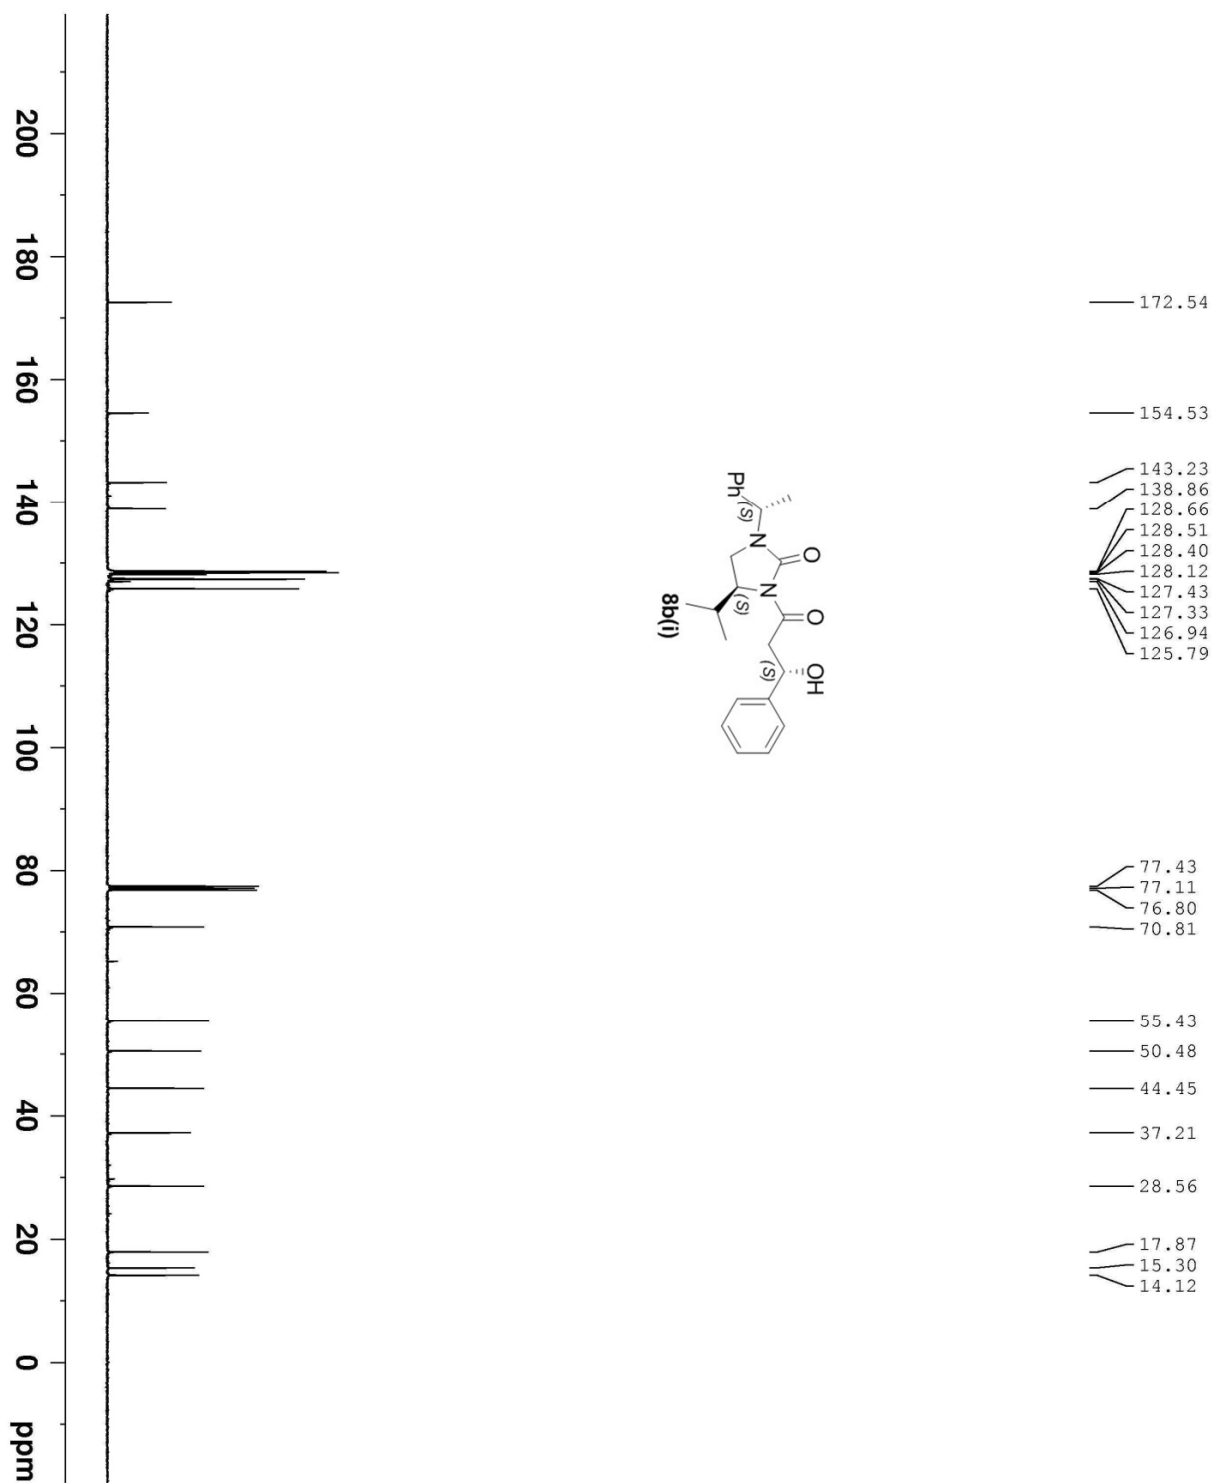

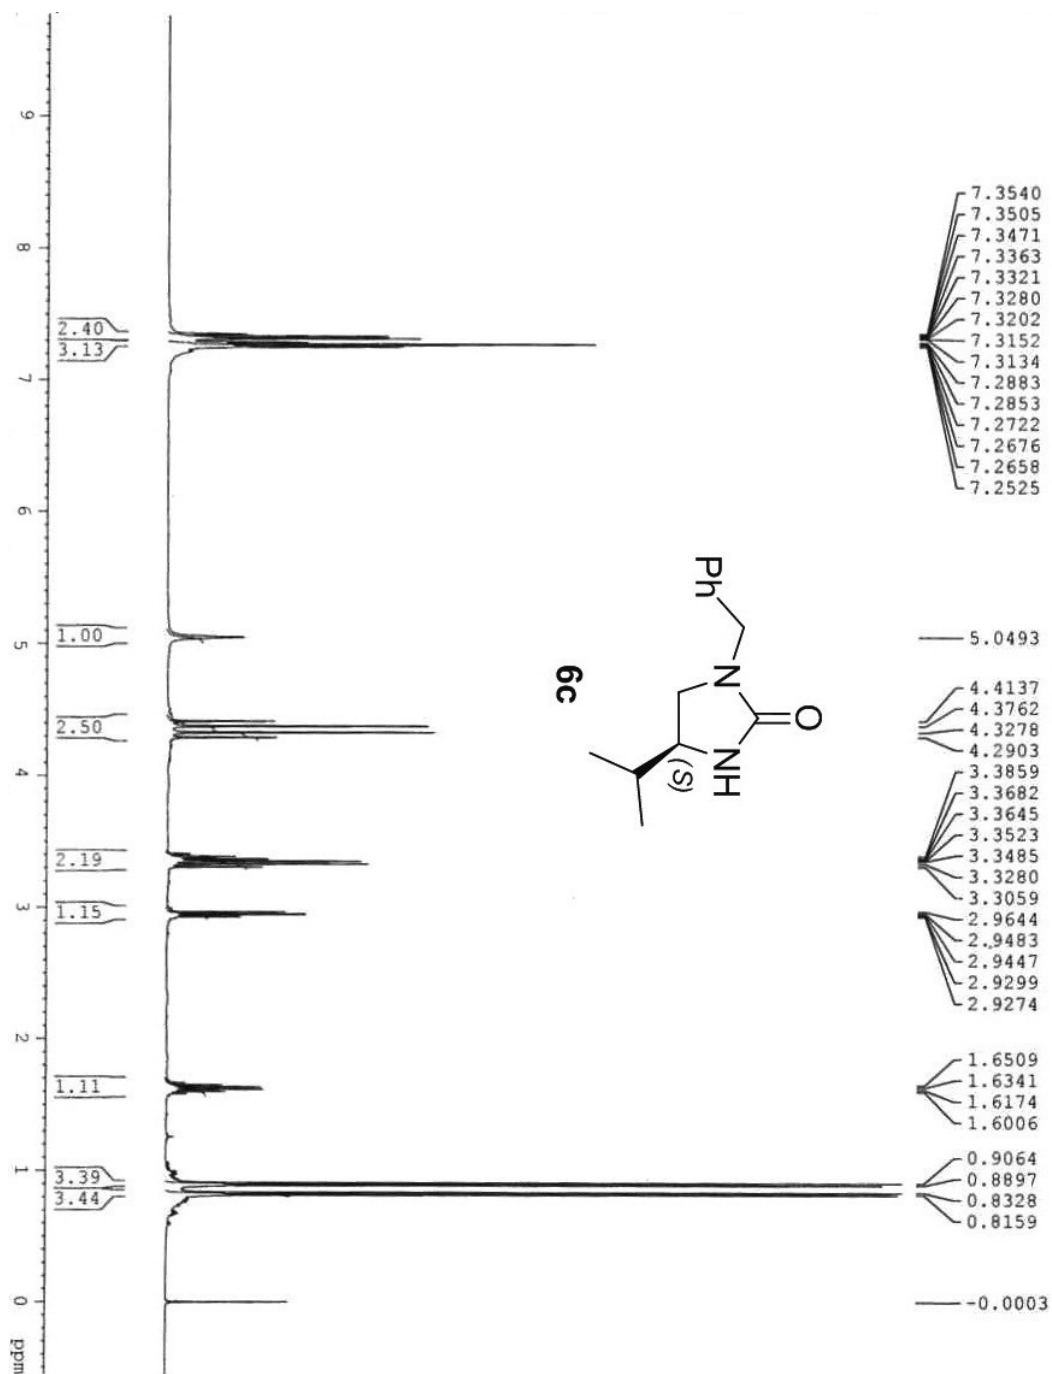

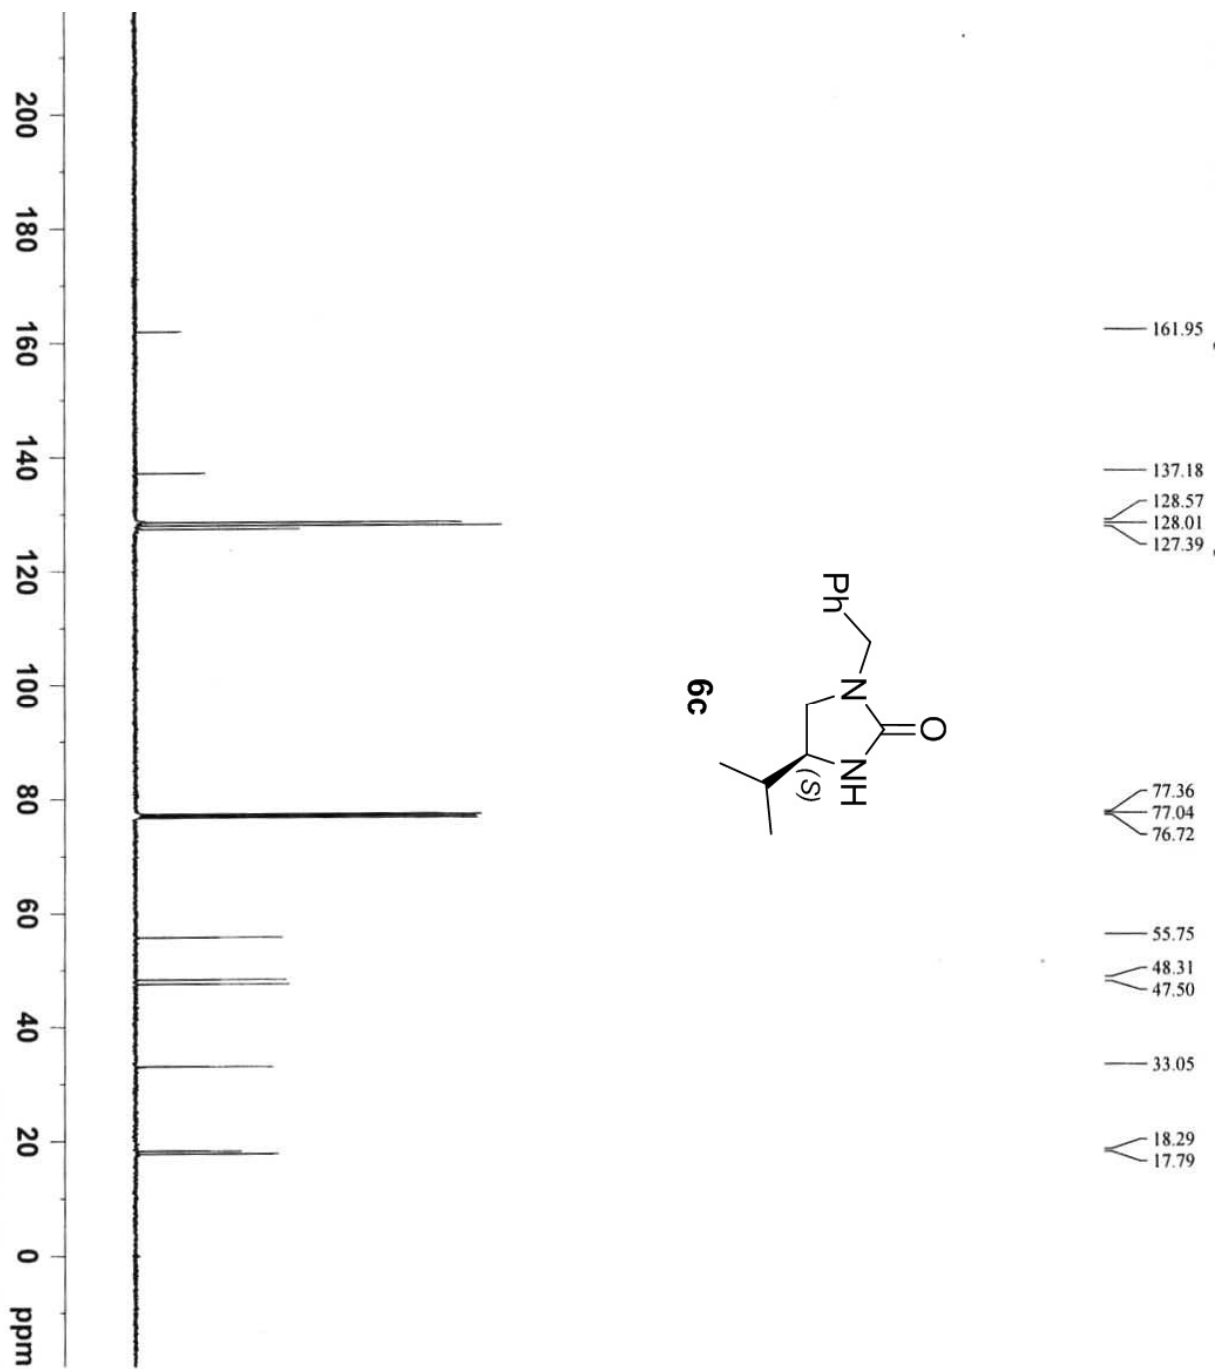

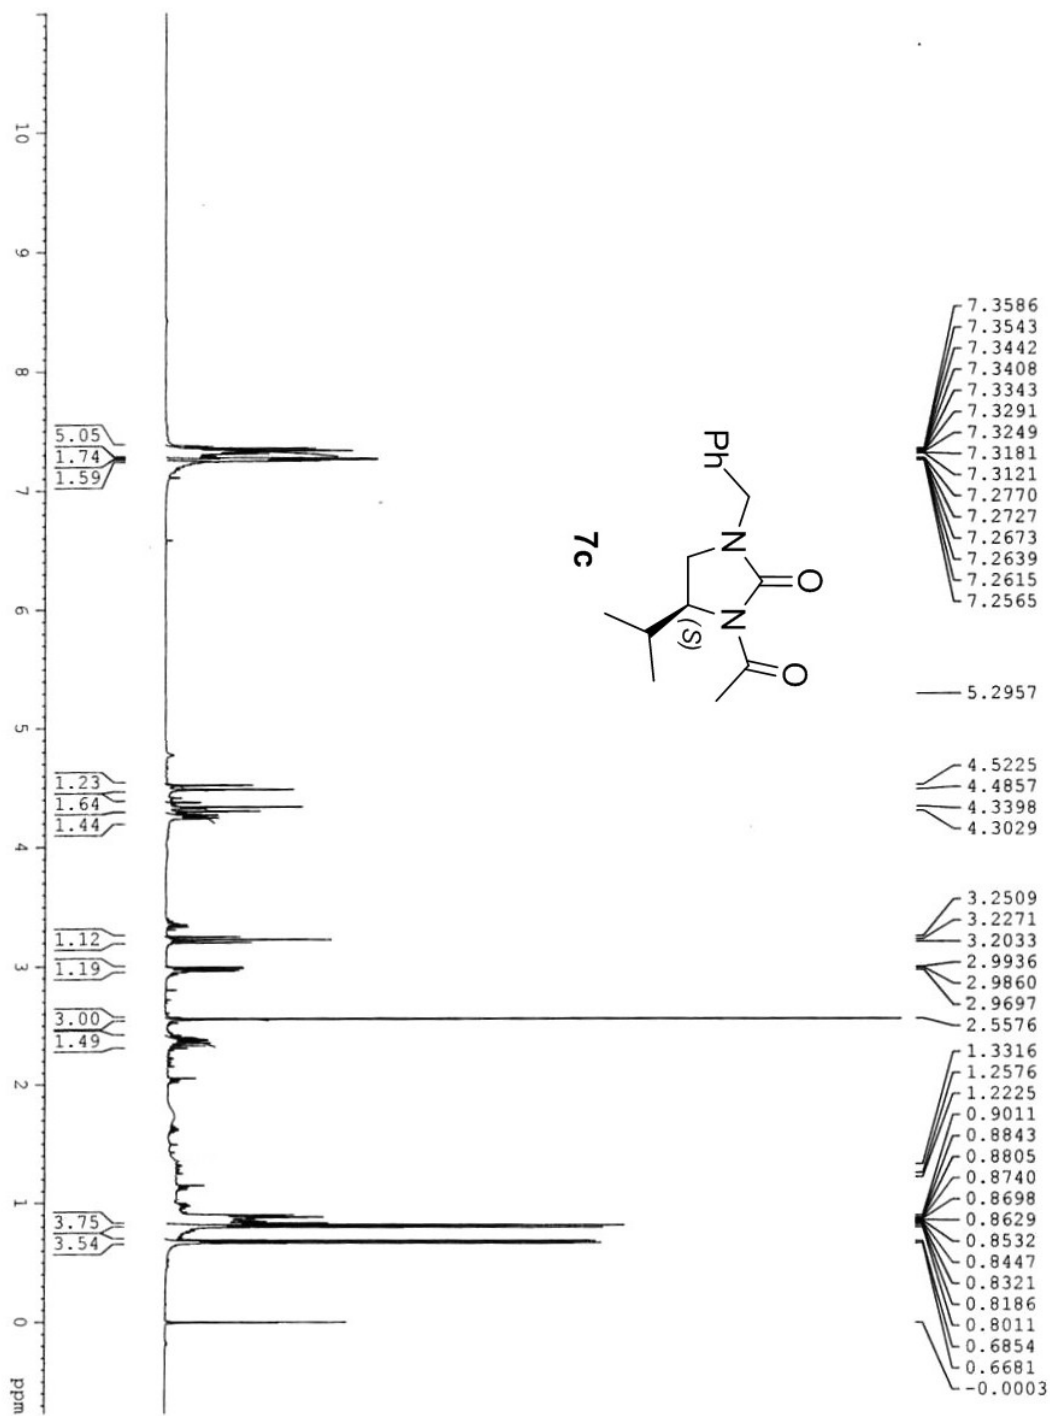

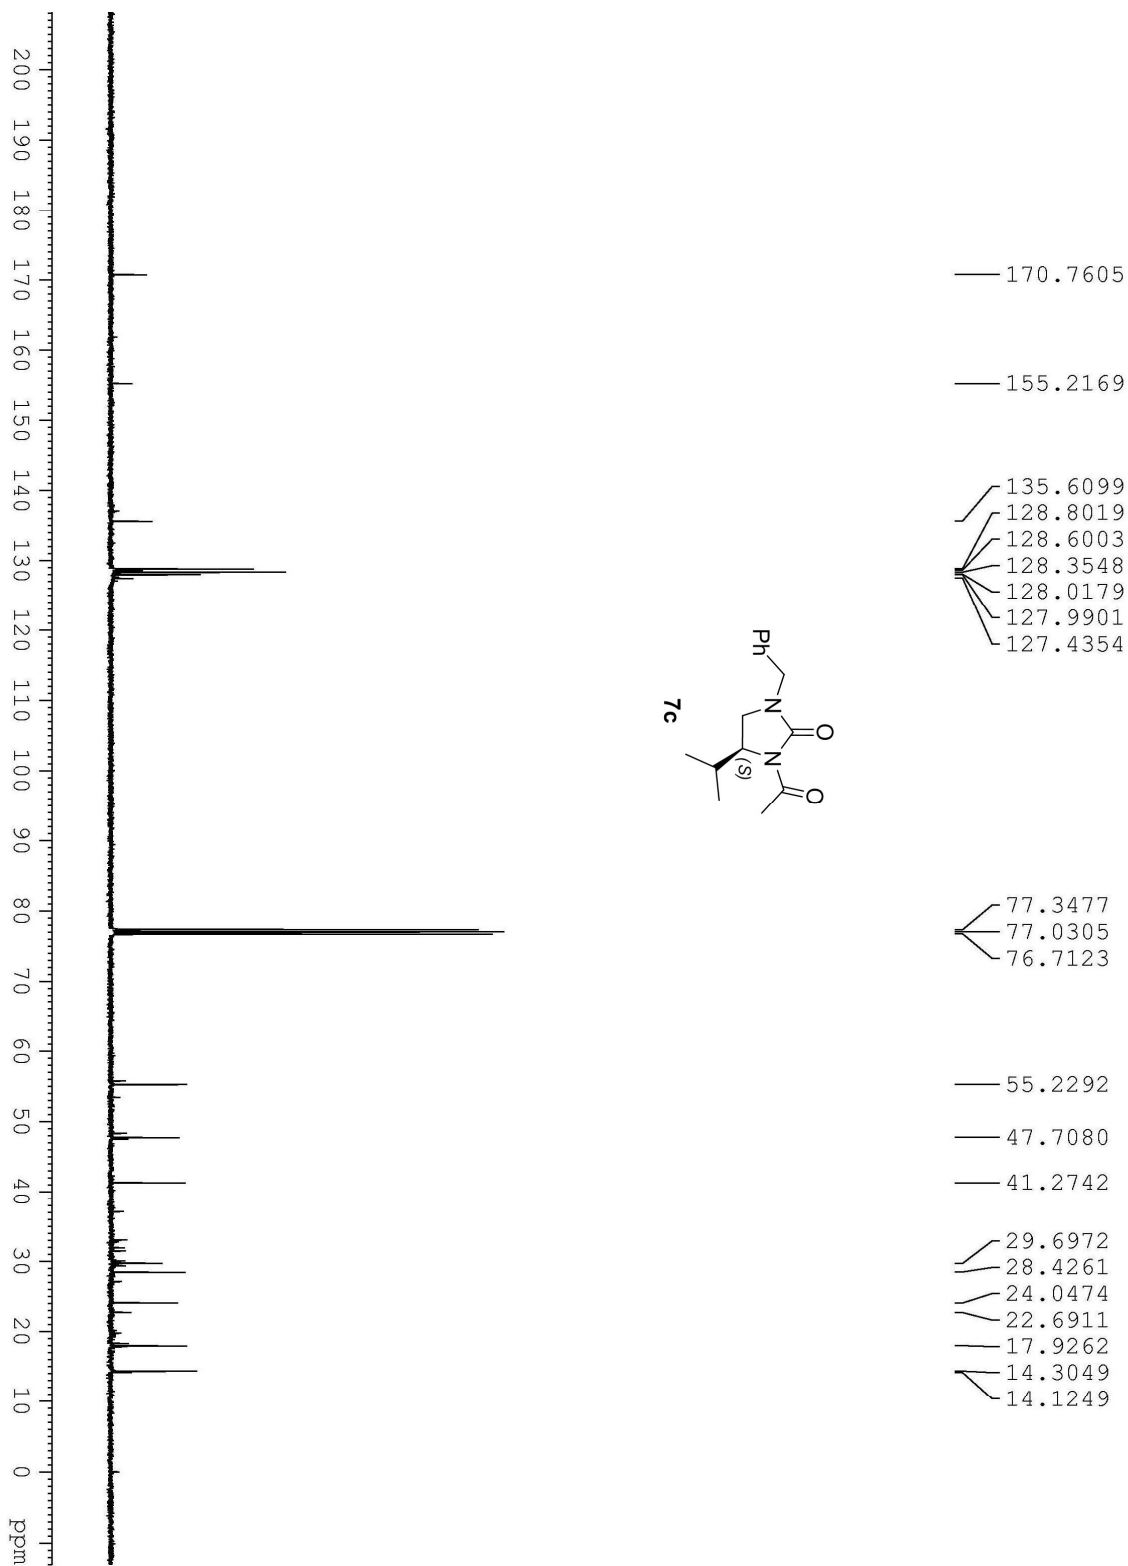

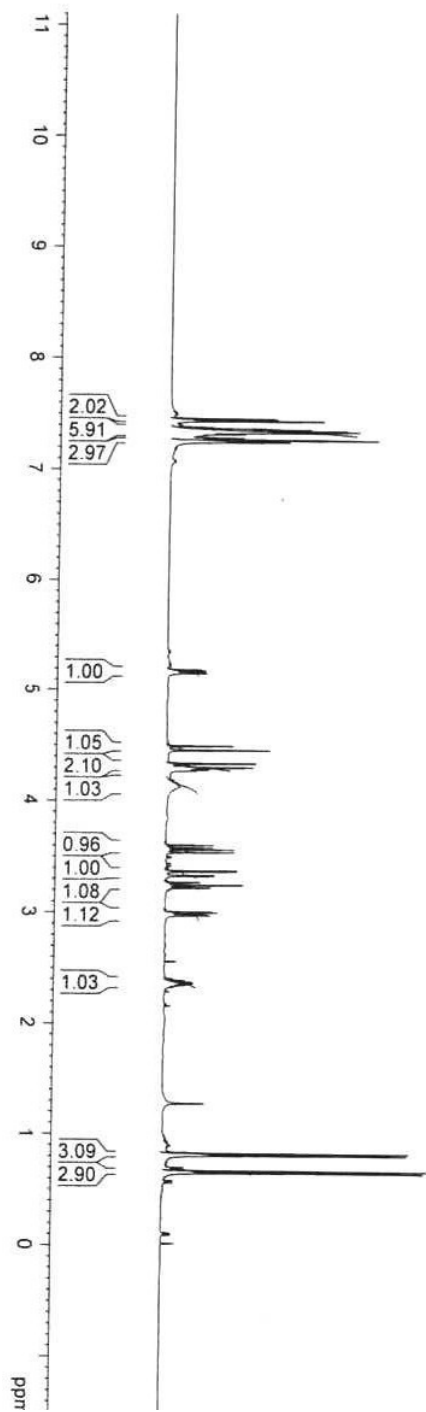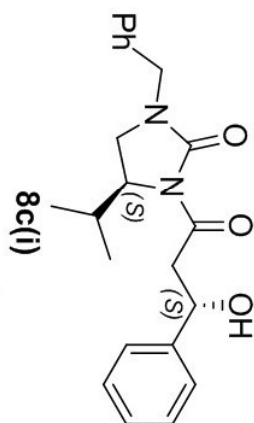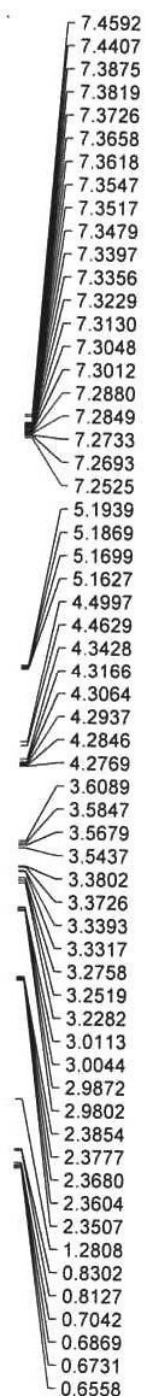

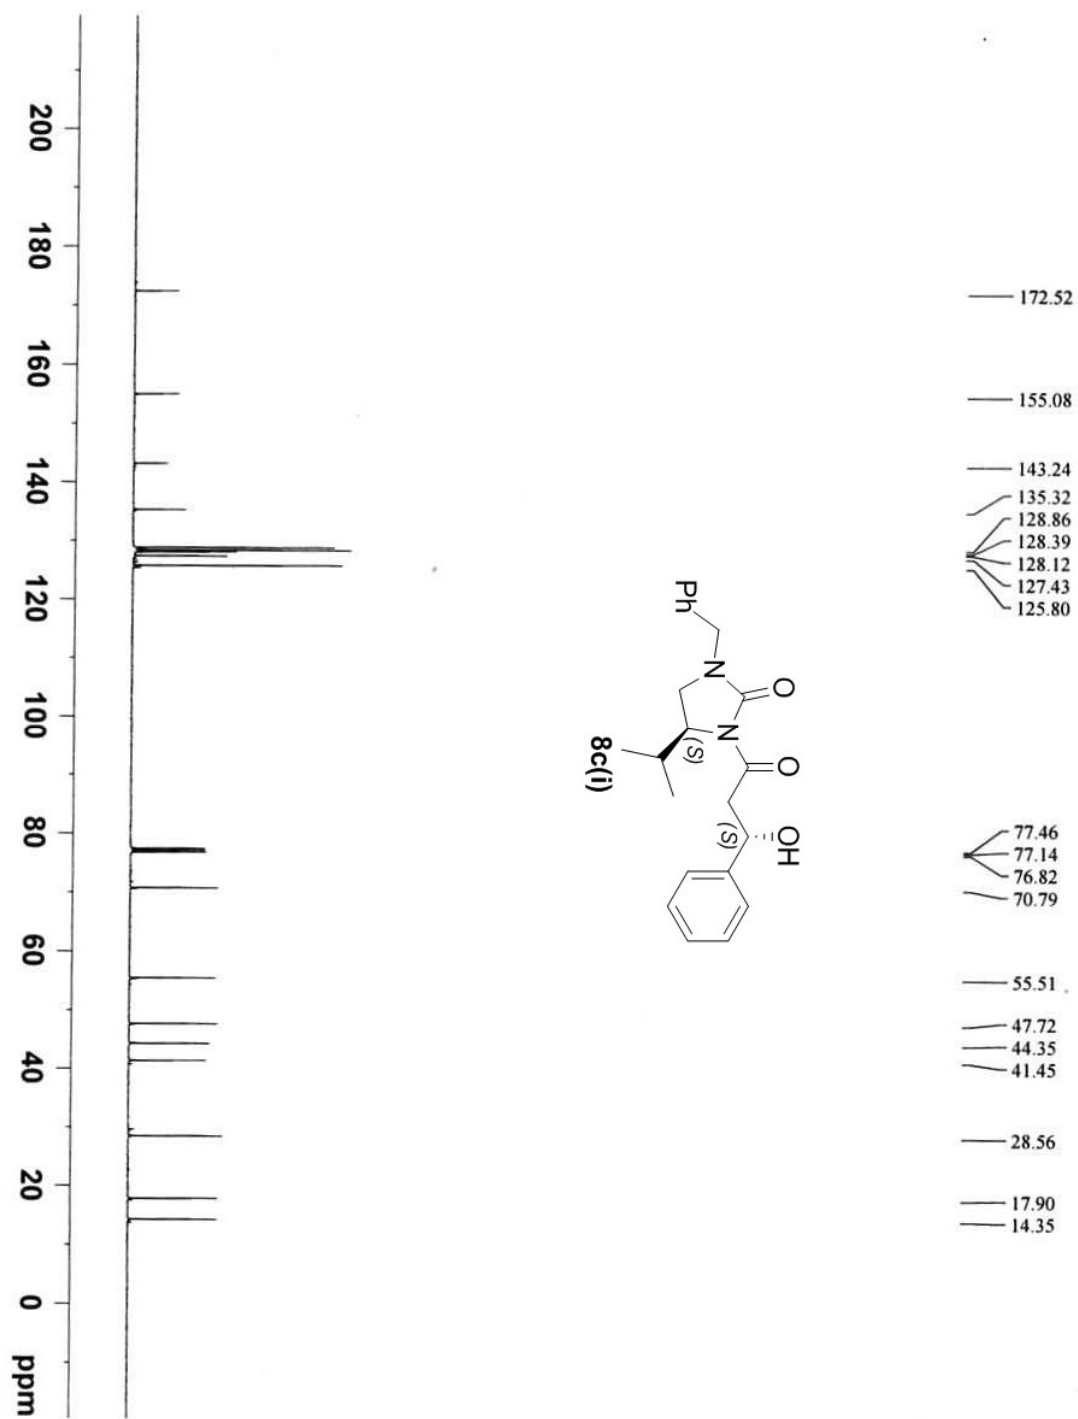

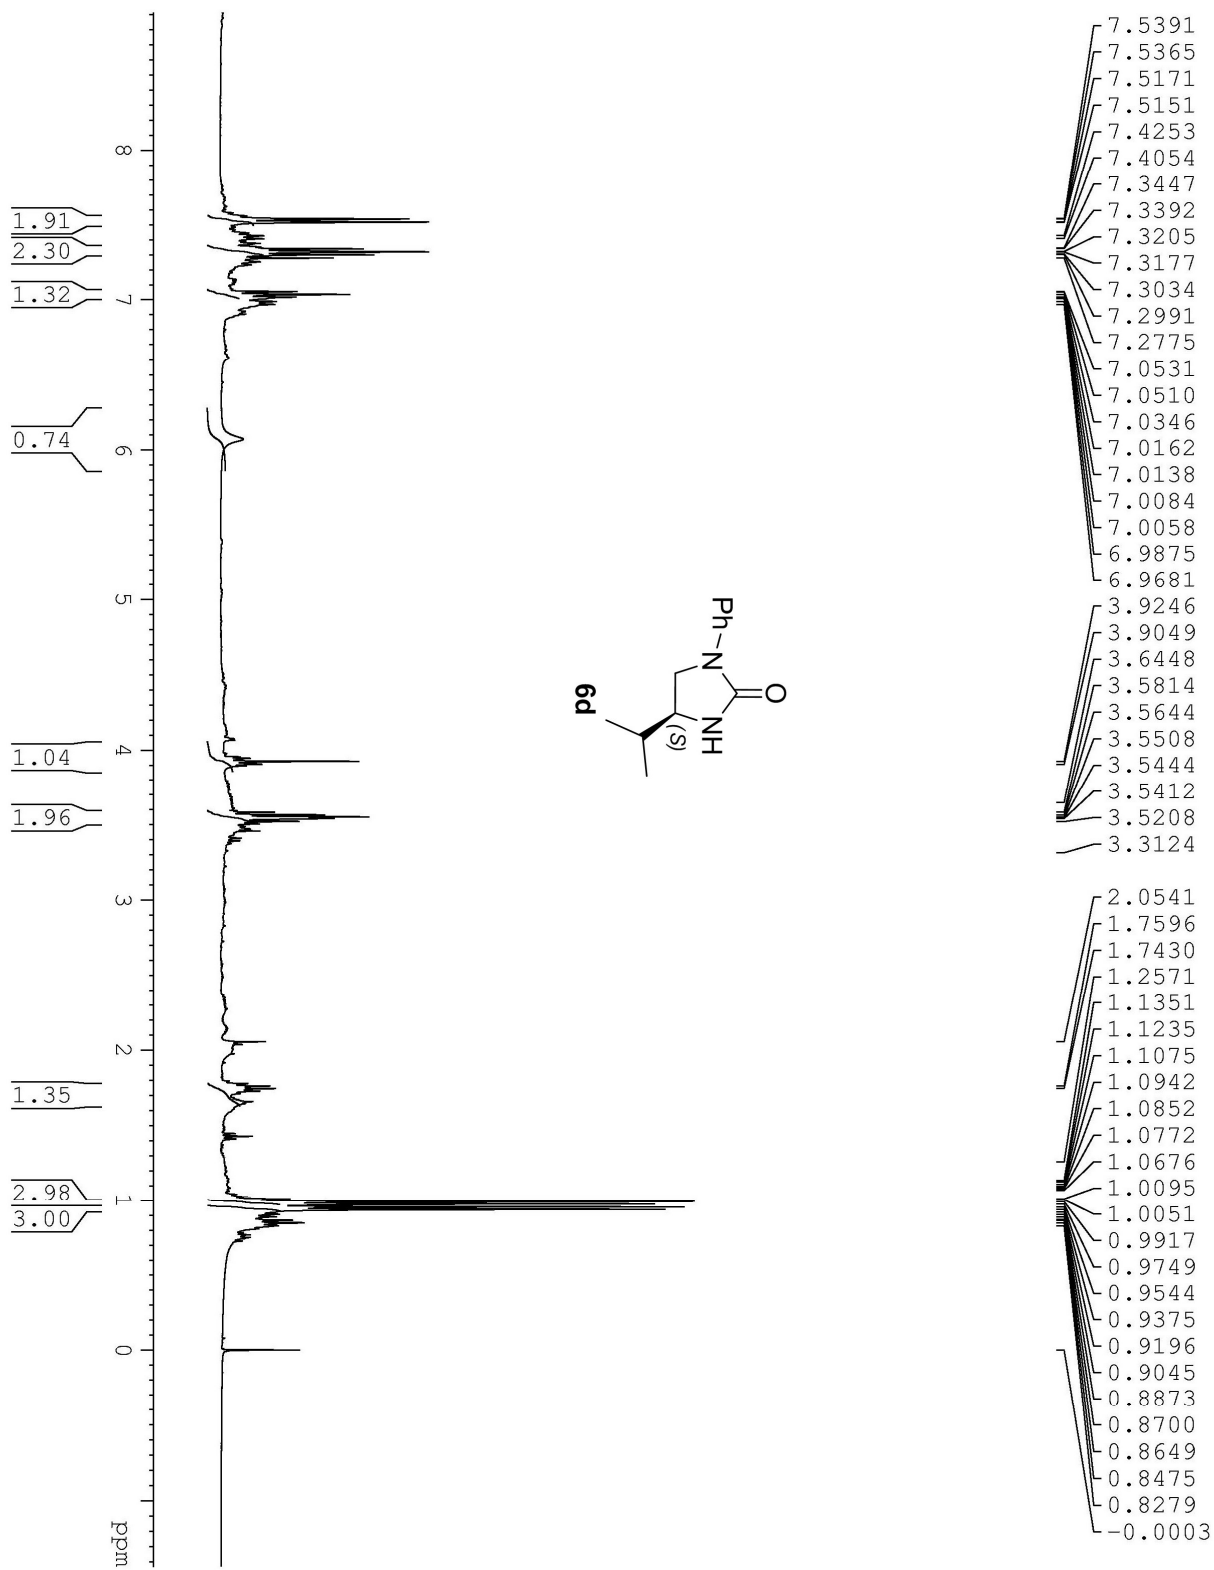



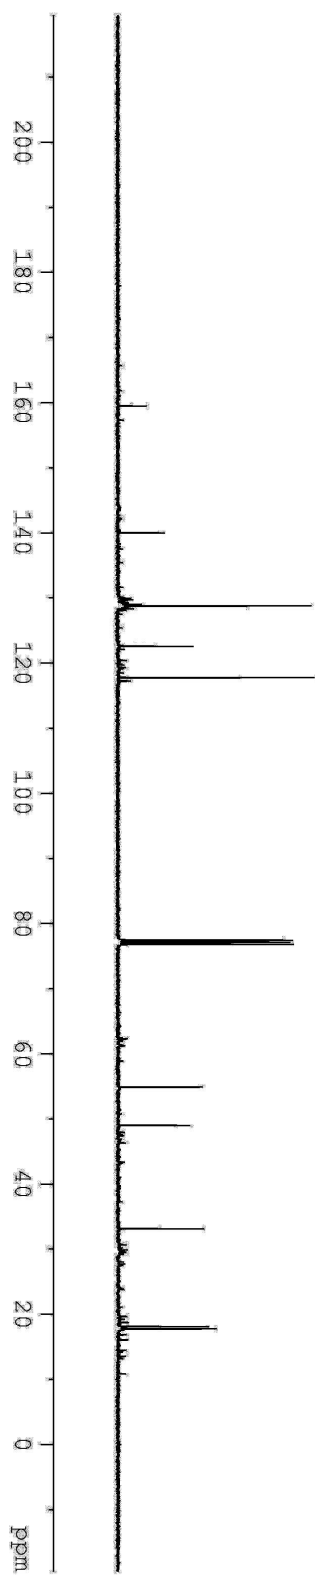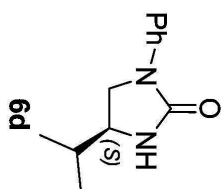

159.4719

140.0148

129.0307

123.6223

117.7759

77.4553  
77.1872  
76.8192

54.8781

49.0167

33.1276

18.0917  
17.7477

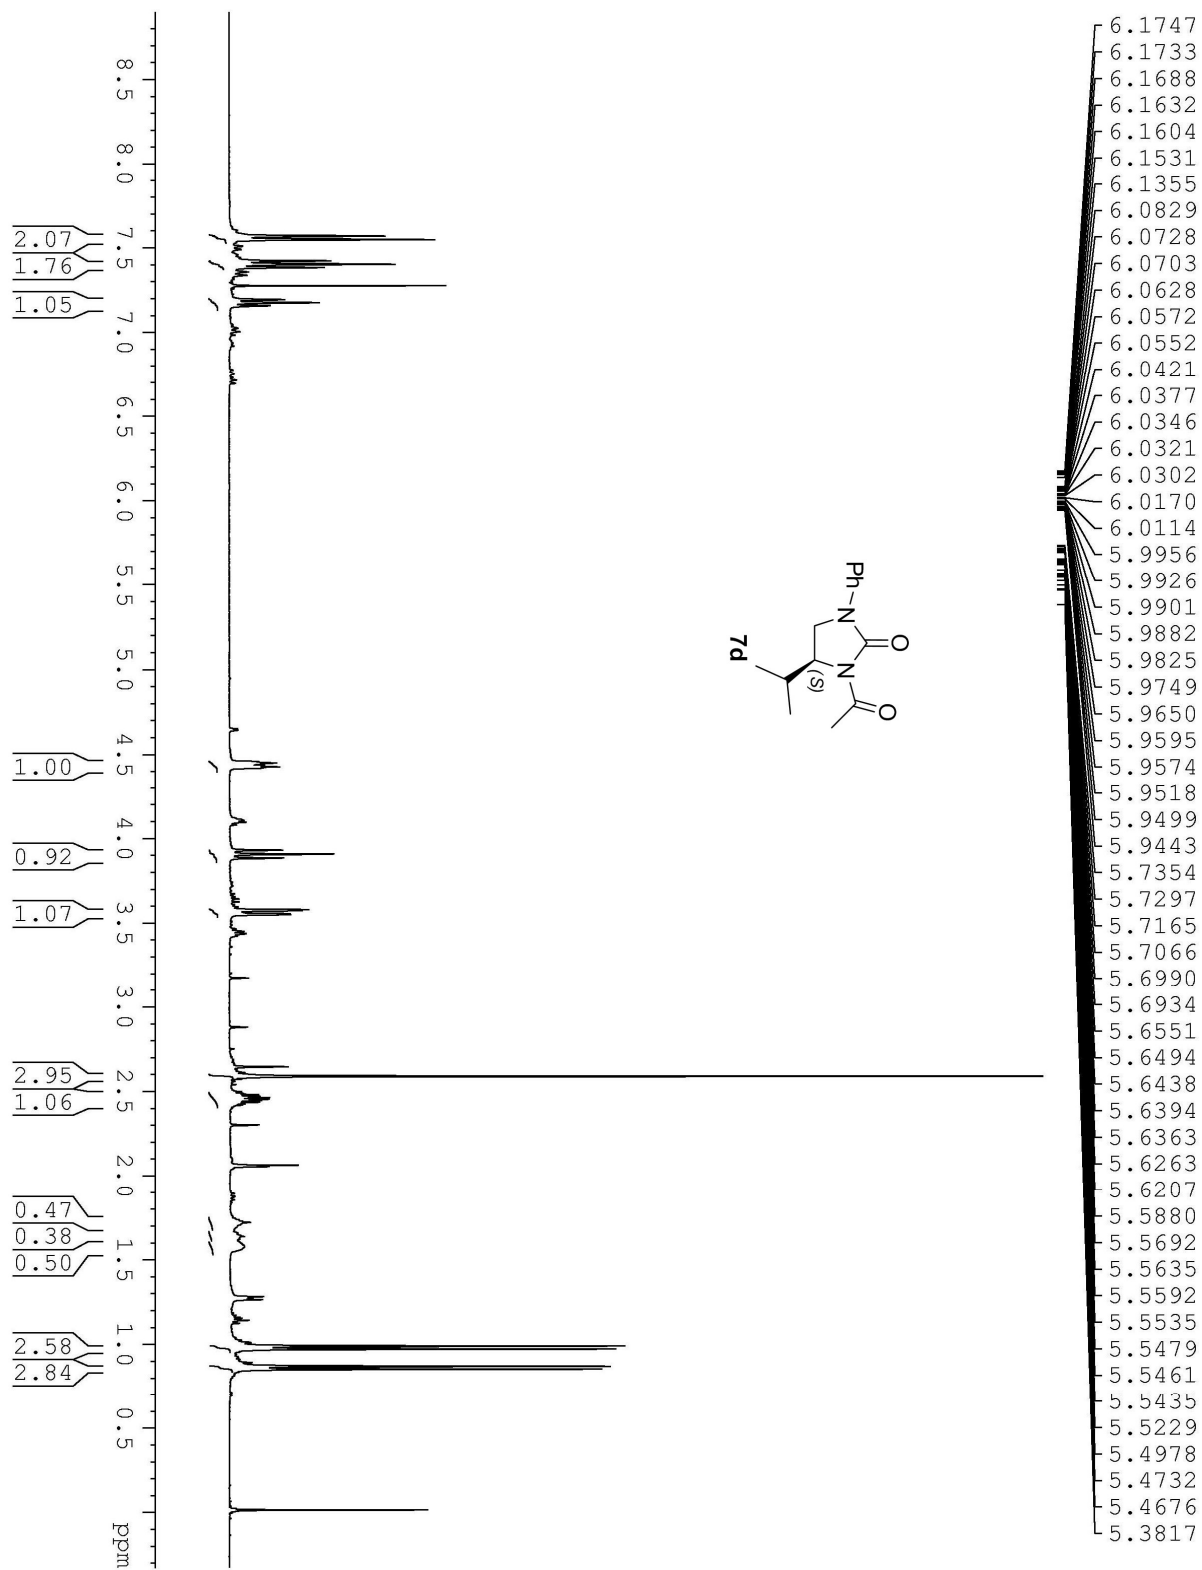

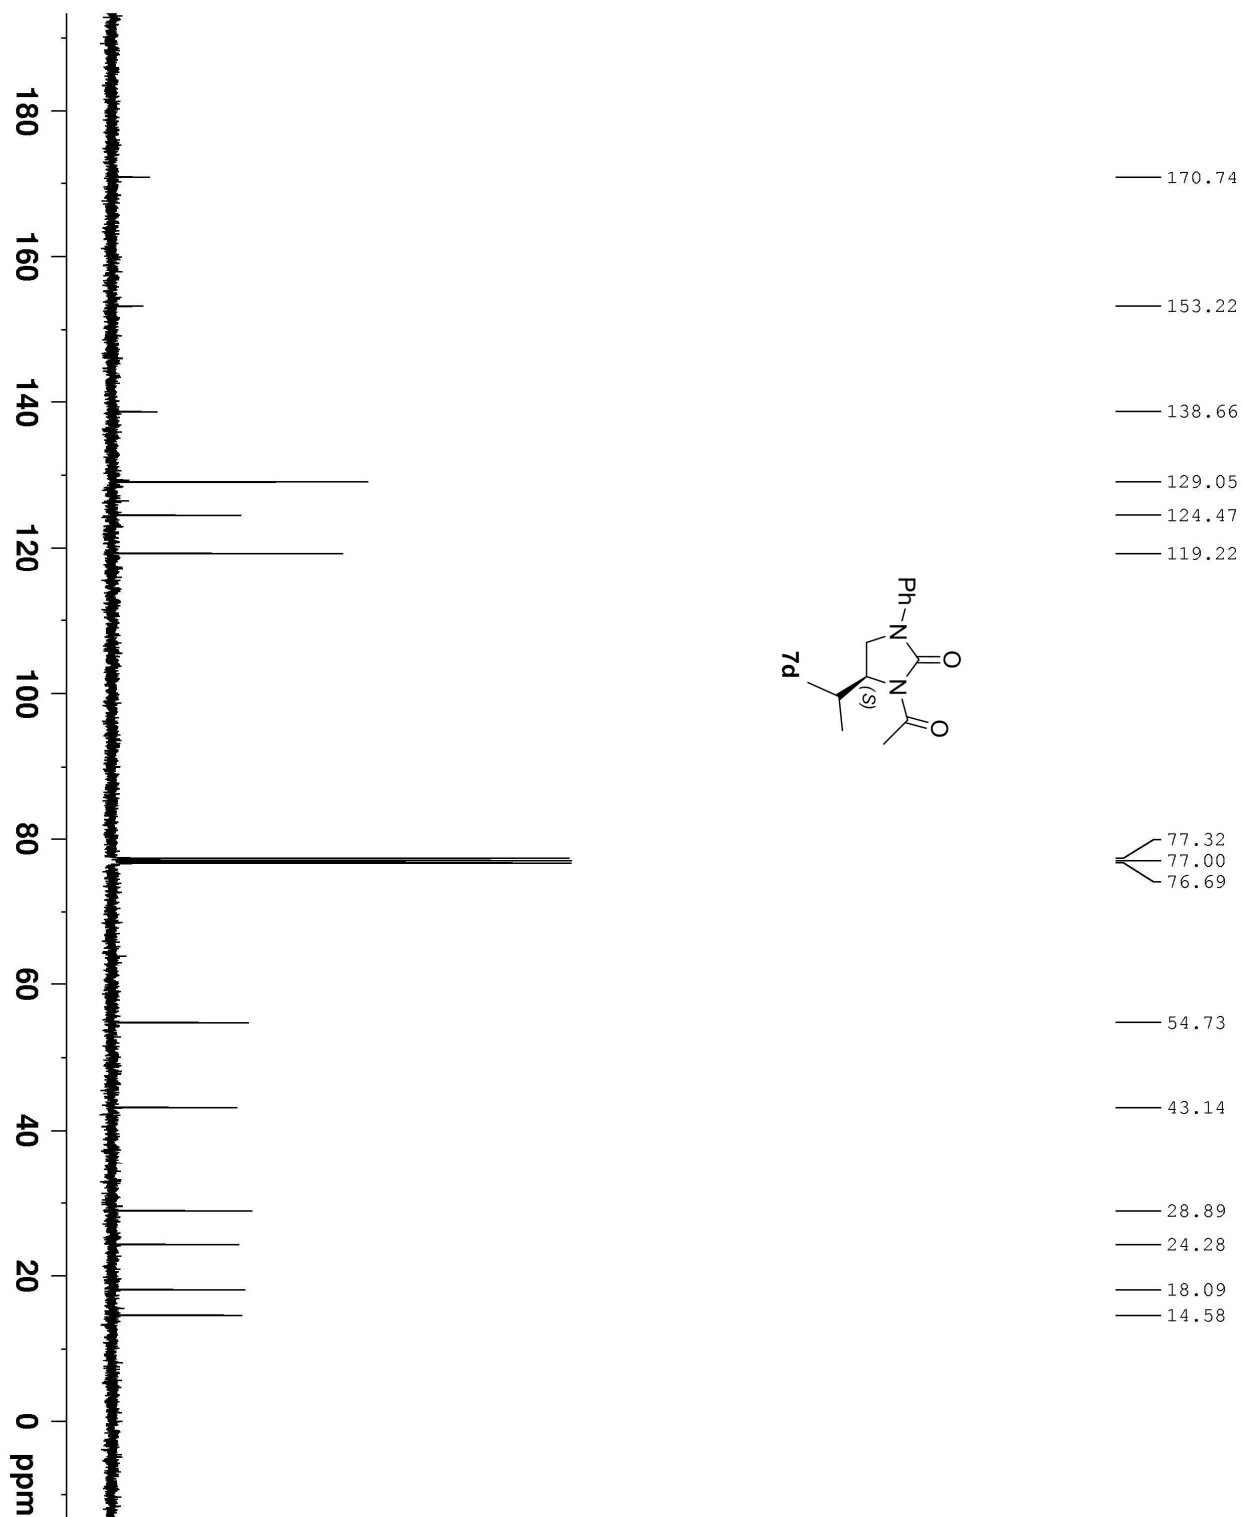

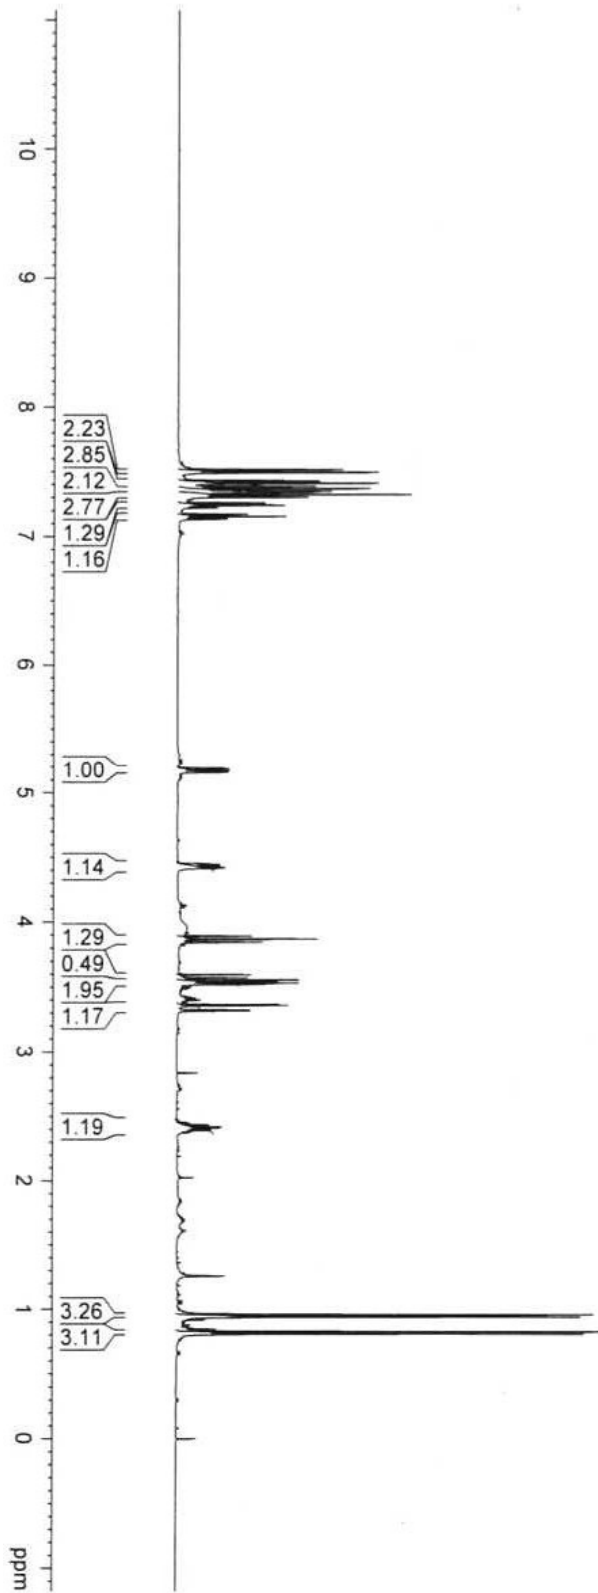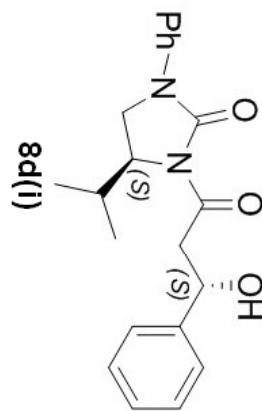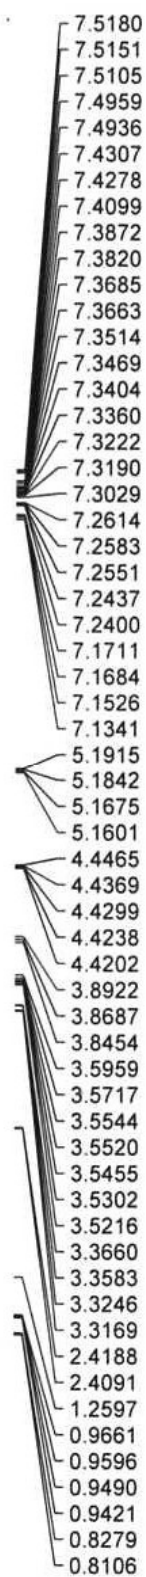

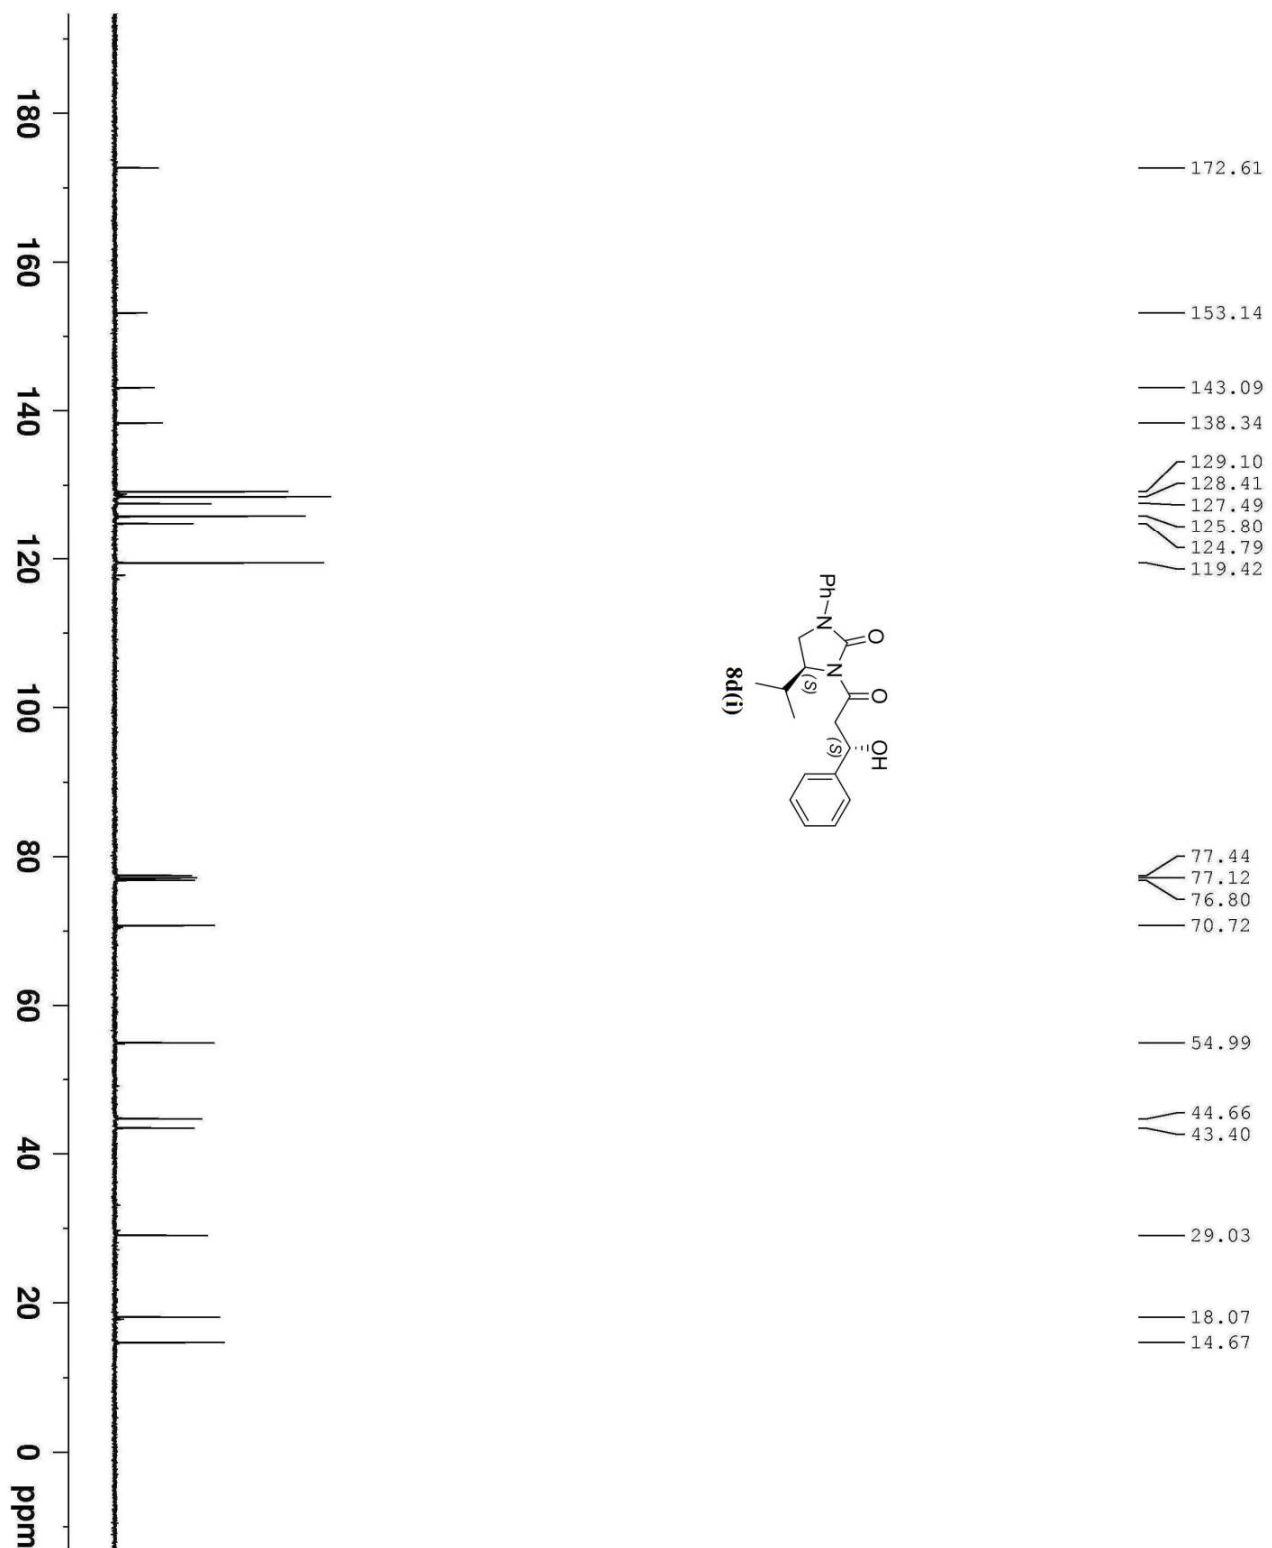

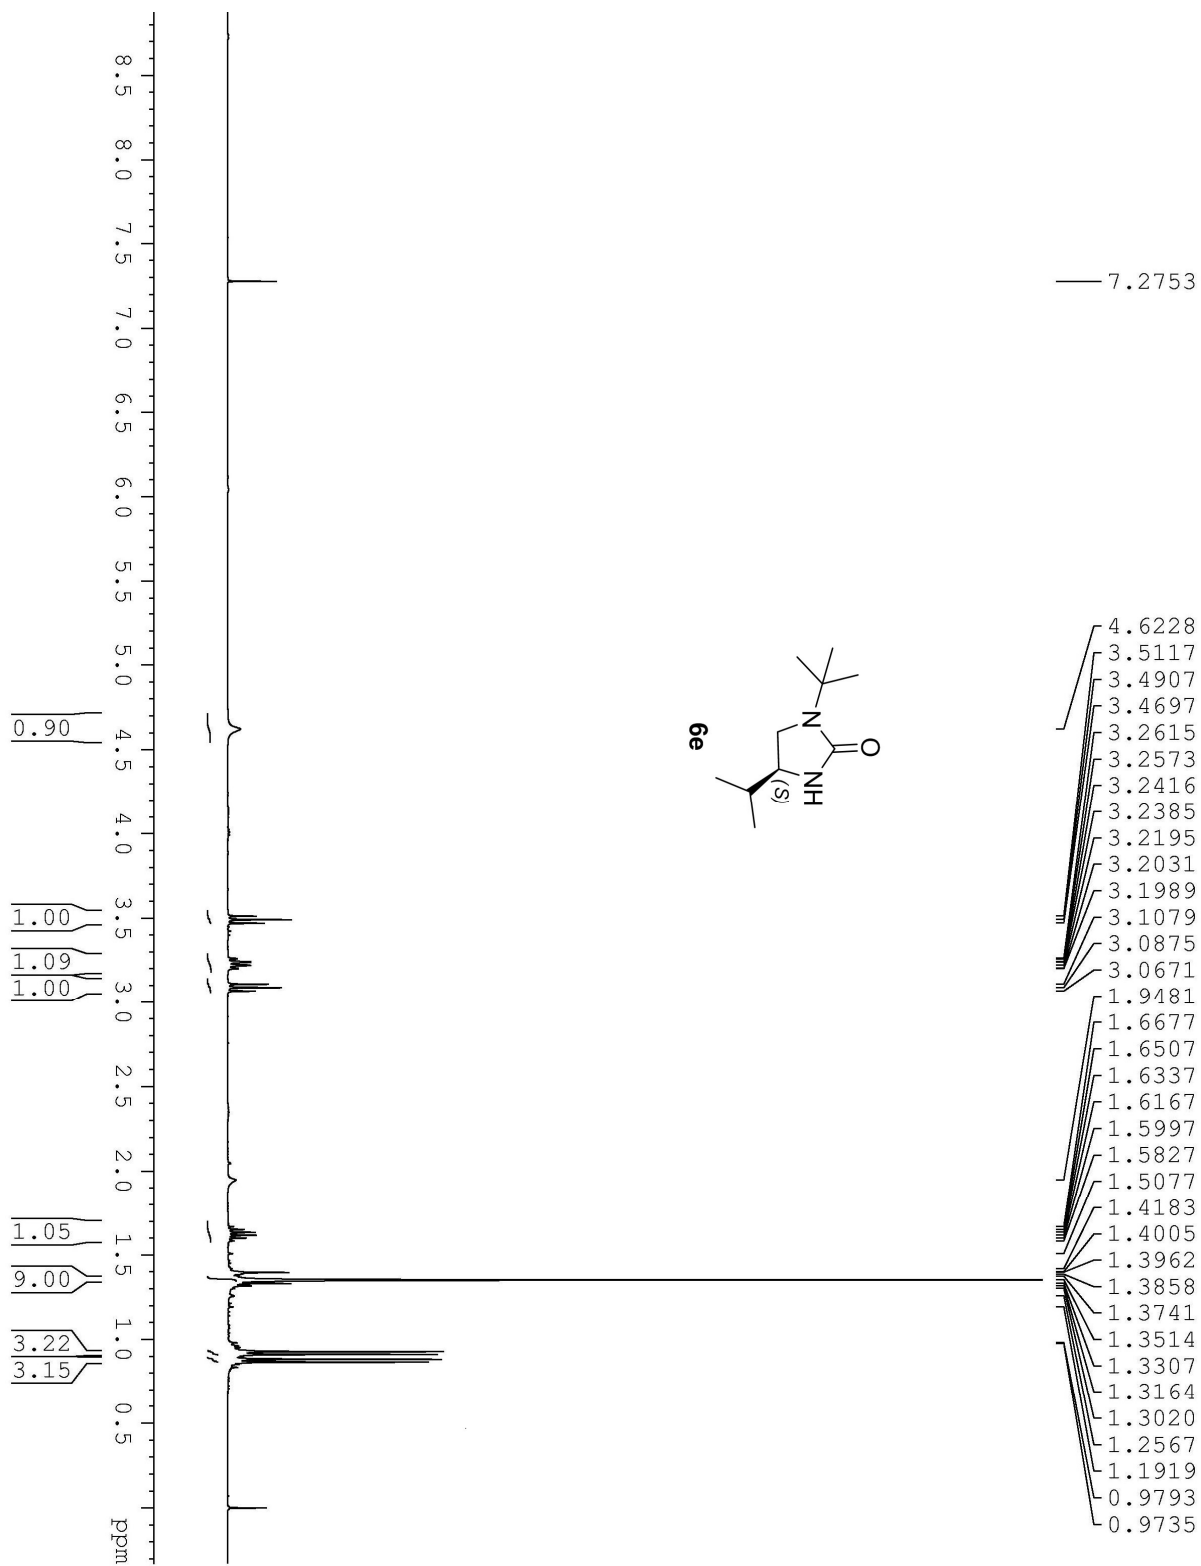

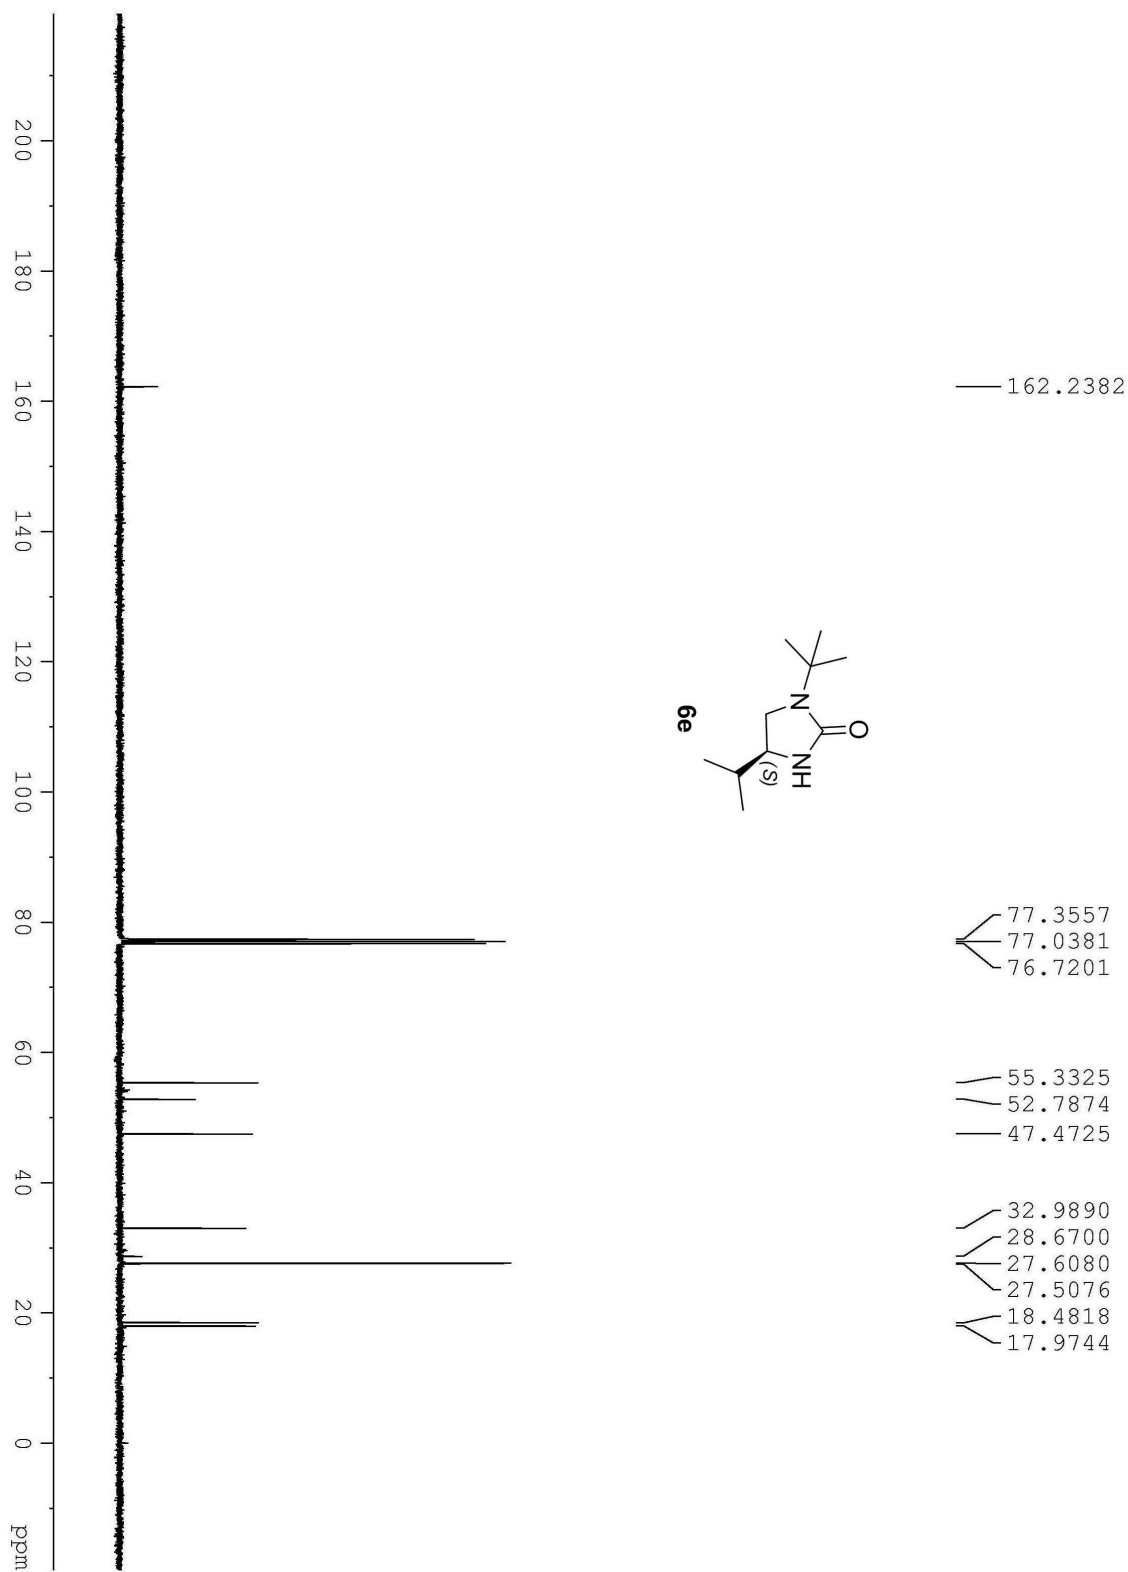

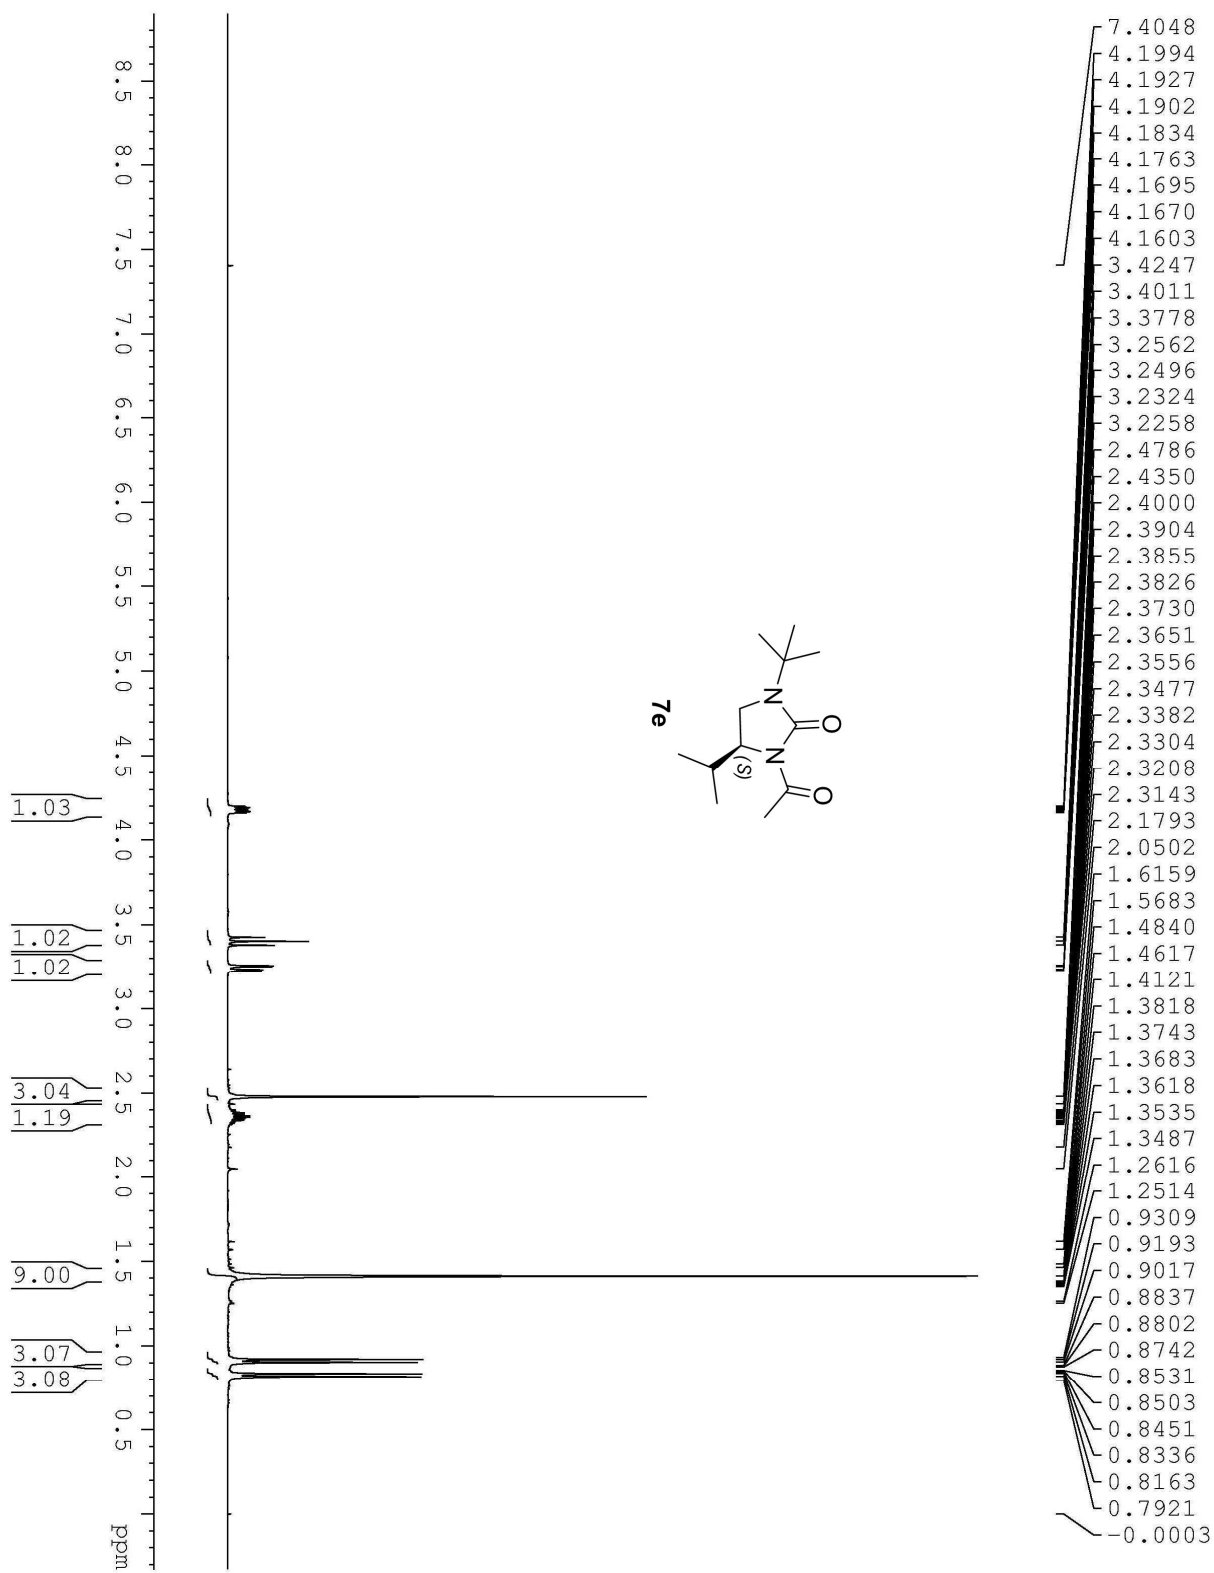



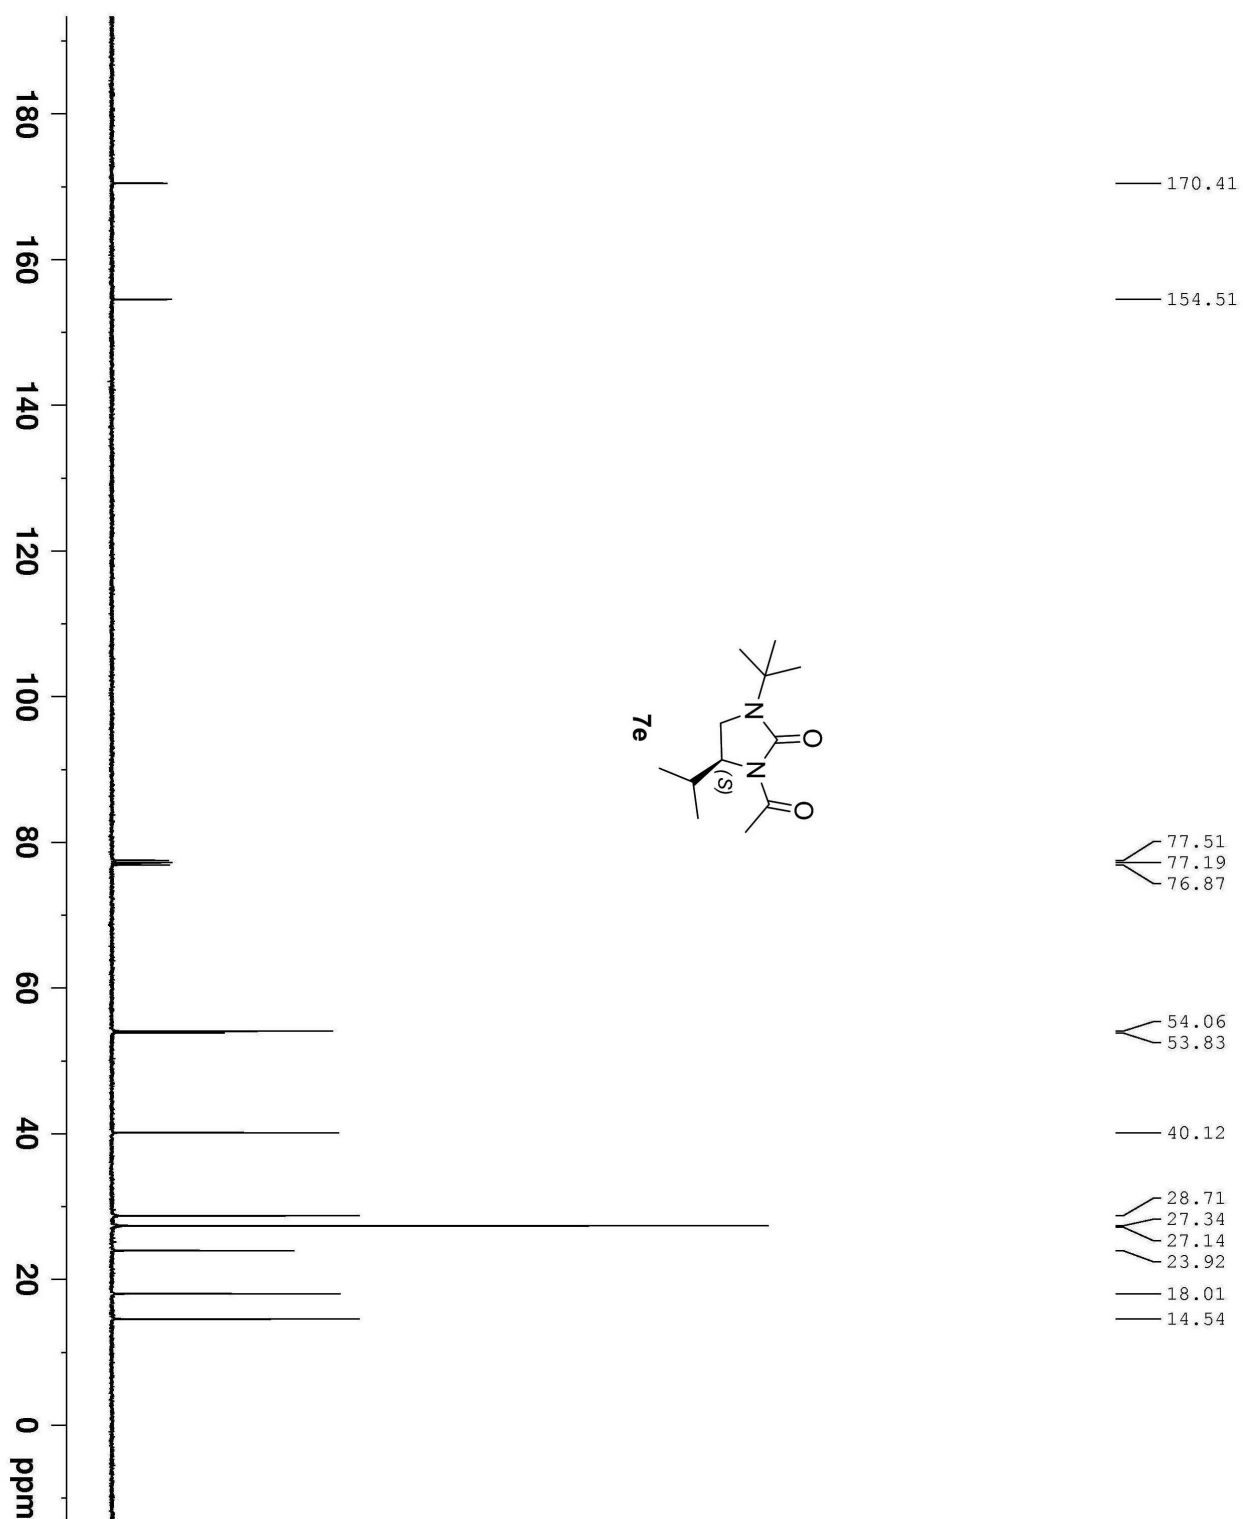

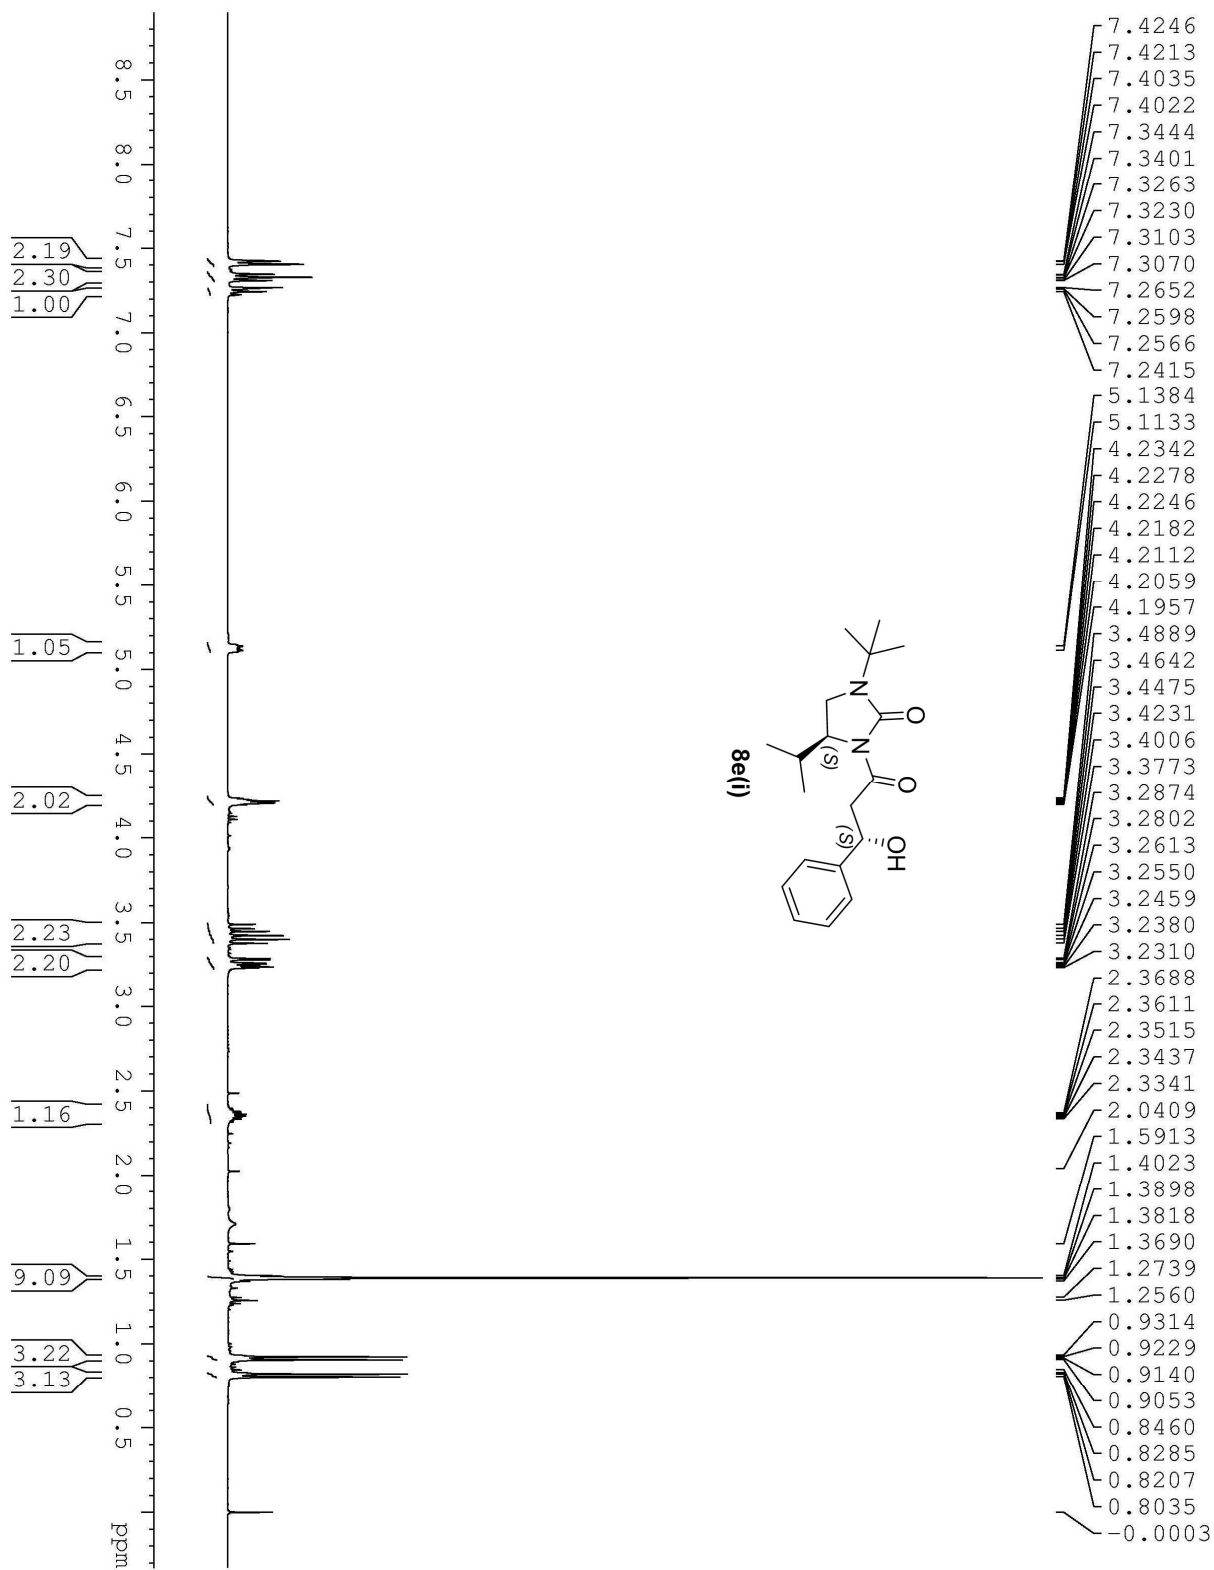

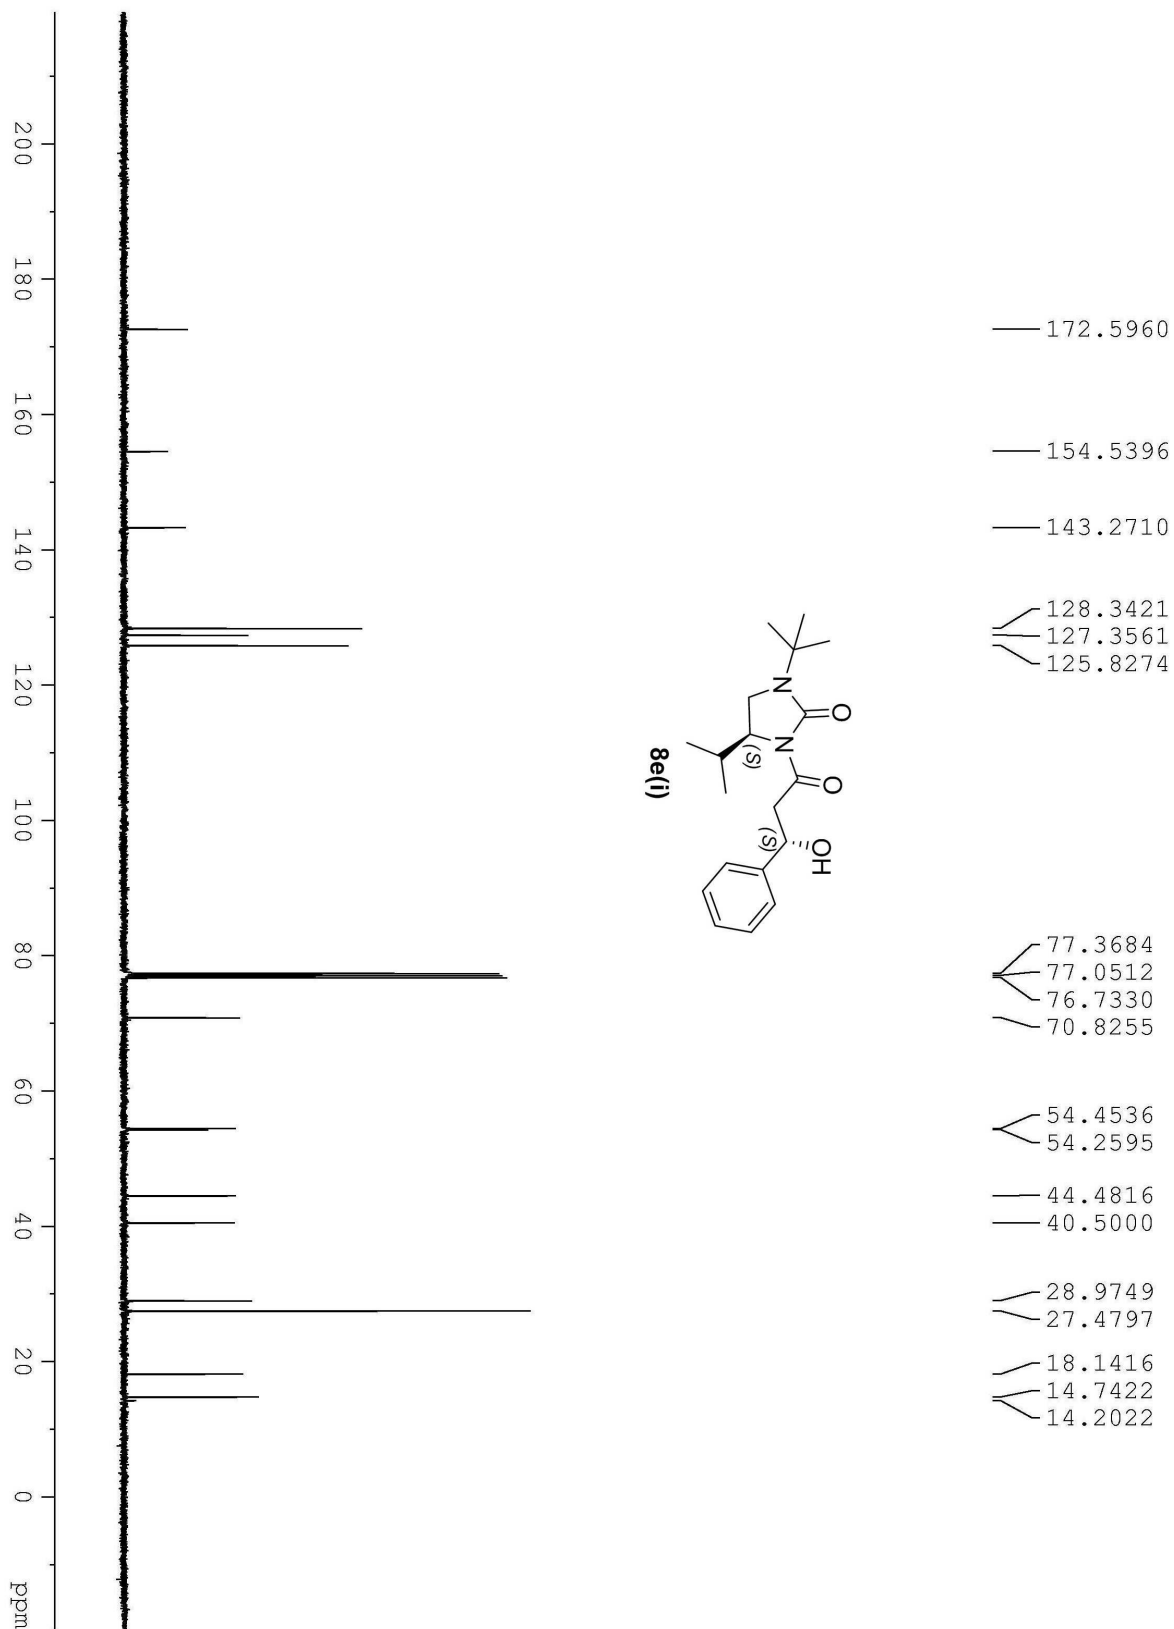

Supplement: Supplementary file 1 [file 4164754]
